# Supplementary material for: Fetal liver macrophages contribute to the hematopoietic stem cell niche by controlling granulopoiesis
Source: eLife. 2024 Mar 25;13:e86493. doi: 10.7554/eLife.86493 (PMC11006421; doi:10.7554/eLife.86493)
Supplement: Figure 1—source data 1. [file elife-86493-fig1-data1.xlsx]

## Sheet: Figure 1H
	A	B	C	D
Tnfrsf11aCre	43.73	91.64	46.92	9.72
Tnfrsf11aCre	41.8	91.39	45.45	8.06
Tnfrsf11aCre	41.25	89.87	42.8	7.96
Tnfrsf11aCre	37.75	89.52	39.27	6.96
Ms4a3Cre	0.21	0.86	0.47	11.6
Ms4a3Cre	0	0.32	0	10
Ms4a3Cre	0	0	0	9.67
Cxcr4CreERT	1.35	2.34	0.72	73.71
Cxcr4CreERT	0.93	1.84	0.58	72.16
Cxcr4CreERT	0.69	1.62	0	65.67
