# Supplementary material for: Fetal liver macrophages contribute to the hematopoietic stem cell niche by controlling granulopoiesis
Source: eLife. 2024 Mar 25;13:e86493. doi: 10.7554/eLife.86493 (PMC11006421; doi:10.7554/eLife.86493)
Supplement: Figure 3—source data 1. [file elife-86493-fig3-data1.xlsx]

## Sheet: Figure 3E
CD150 + shortest distance	CD150- shortest distance
0.345134	0
0.87785	0
0.943135	0
0.949036	0
0.975386	0
0.978709	0
1.01615	0
1.03166	0
1.11036	0
1.20744	0
1.21719	0
1.25468	0
1.37591	0
1.3911	0
1.42909	0
1.58548	0
1.79146	0
1.80951	0
1.90968	0
2.06622	0.0202717
2.06622	0.0420759
2.1035	0.13816
2.1595	0.140348
2.26244	0.172074
2.3028	0.187973
2.39457	0.188645
2.44311	0.323736
2.53717	0.345134
2.70972	0.346404
2.70972	0.353258
2.74988	0.36282
2.86334	0.432481
3.15488	0.435182
3.55719	0.458658
3.77377	0.493912
4.17612	0.520353
4.17612	0.528677
4.20636	0.594989
4.46435	0.605974
5.4877	0.654112
6.10421	0.657044
7.73347	0.658471
	0.662468
	0.726101
	0.726779
	0.733241
	0.814079
	0.814365
	0.847983
	0.87785
	0.882548
	0.884715
	0.906922
	0.913994
	0.943135
	0.944422
	0.947714
	0.949036
	0.966666
	0.975386
	0.978709
	0.986319
	0.990167
	1.00663
	1.01615
	1.01837
	1.03166
	1.03375
	1.04303
	1.04368
	1.05471
	1.11036
	1.14023
	1.14037
	1.16406
	1.18003
	1.20744
	1.21719
	1.22721
	1.24722
	1.25468
	1.25487
	1.27204
	1.28191
	1.3122
	1.31711
	1.32897
	1.33074
	1.3483
	1.35412
	1.37591
	1.38169
	1.38348
	1.3911
	1.40191
	1.41398
	1.42909
	1.45046
	1.46908
	1.48345
	1.50638
	1.519
	1.52216
	1.53198
	1.55285
	1.5771
	1.58548
	1.60501
	1.60998
	1.64386
	1.65413
	1.67324
	1.67697
	1.68738
	1.68918
	1.70436
	1.70648
	1.71702
	1.7303
	1.73381
	1.74013
	1.74708
	1.76836
	1.77287
	1.79146
	1.79371
	1.79712
	1.79968
	1.80283
	1.80951
	1.82906
	1.8311
	1.83301
	1.84017
	1.84406
	1.86302
	1.86974
	1.88433
	1.88435
	1.88532
	1.89903
	1.90853
	1.90968
	1.91098
	1.91372
	1.9316
	1.95259
	1.96624
	1.97359
	1.98194
	1.9955
	2.00238
	2.00297
	2.00601
	2.00767
	2.06561
	2.06622
	2.0665
	2.07359
	2.07834
	2.08619
	2.1035
	2.10909
	2.11279
	2.12291
	2.14458
	2.14757
	2.1595
	2.15973
	2.16337
	2.17419
	2.17864
	2.18863
	2.21814
	2.22324
	2.22458
	2.23564
	2.23704
	2.2451
	2.24991
	2.25037
	2.25496
	2.25535
	2.25799
	2.26244
	2.27234
	2.27253
	2.27689
	2.27882
	2.28201
	2.28775
	2.28962
	2.3028
	2.32748
	2.32783
	2.33374
	2.33407
	2.33536
	2.33623
	2.33871
	2.3431
	2.34918
	2.35564
	2.36568
	2.36662
	2.37385
	2.38911
	2.39457
	2.41031
	2.42239
	2.44052
	2.44311
	2.4503
	2.45061
	2.46214
	2.4631
	2.46401
	2.4961
	2.5046
	2.51952
	2.51981
	2.52843
	2.53717
	2.53759
	2.53945
	2.56592
	2.56817
	2.58429
	2.5901
	2.59087
	2.59167
	2.59485
	2.59759
	2.59918
	2.59963
	2.60946
	2.62136
	2.62421
	2.63598
	2.64199
	2.66132
	2.66863
	2.68777
	2.6893
	2.7071
	2.72726
	2.7383
	2.74488
	2.74515
	2.74988
	2.77262
	2.77845
	2.78649
	2.80076
	2.80298
	2.81772
	2.81918
	2.83133
	2.83701
	2.84268
	2.84703
	2.84711
	2.86334
	2.86355
	2.88709
	2.89467
	2.90095
	2.92229
	2.94109
	2.95372
	2.96541
	2.9789
	2.98596
	2.99002
	3.00347
	3.01741
	3.04474
	3.04879
	3.06456
	3.07019
	3.08251
	3.08424
	3.08629
	3.09931
	3.11063
	3.1116
	3.15488
	3.18858
	3.19248
	3.23669
	3.24028
	3.24954
	3.26341
	3.27753
	3.29872
	3.30246
	3.30406
	3.30534
	3.31018
	3.3122
	3.31782
	3.34684
	3.35595
	3.37773
	3.38297
	3.39557
	3.40659
	3.40795
	3.48379
	3.49145
	3.49555
	3.55719
	3.57639
	3.58041
	3.58966
	3.59013
	3.61598
	3.6234
	3.64887
	3.69421
	3.69951
	3.72579
	3.73629
	3.75722
	3.75875
	3.759
	3.75908
	3.77377
	3.78436
	3.8456
	3.84822
	3.86764
	3.89888
	3.90379
	3.90953
	3.92423
	3.93594
	3.94442
	3.95558
	3.99388
	4.01191
	4.05532
	4.05921
	4.07363
	4.09427
	4.10244
	4.10281
	4.12271
	4.13029
	4.15074
	4.20263
	4.20467
	4.20636
	4.22917
	4.23228
	4.25079
	4.28605
	4.39195
	4.41316
	4.41505
	4.41669
	4.41816
	4.42903
	4.4305
	4.43394
	4.43895
	4.45913
	4.46435
	4.46995
	4.47849
	4.52339
	4.54866
	4.65192
	4.67305
	4.67327
	4.70346
	4.70622
	4.71118
	4.72977
	4.76898
	4.77192
	4.80537
	4.81346
	4.82224
	4.83428
	4.84678
	4.87153
	4.87486
	4.89695
	4.9298
	4.95729
	4.96611
	4.97171
	5.01599
	5.02582
	5.04244
	5.06293
	5.06566
	5.08447
	5.10164
	5.10295
	5.12418
	5.13844
	5.16778
	5.24045
	5.24927
	5.25858
	5.2605
	5.27289
	5.28146
	5.29074
	5.38348
	5.44124
	5.4877
	5.53252
	5.54179
	5.54888
	5.55606
	5.56296
	5.56525
	5.56592
	5.59507
	5.70432
	5.73916
	5.74406
	5.76685
	5.77259
	5.82908
	5.8403
	5.84464
	5.88263
	5.88579
	5.88817
	5.92761
	5.97955
	5.99994
	6.00234
	6.00527
	6.02463
	6.05381
	6.05425
	6.0897
	6.10178
	6.10421
	6.11025
	6.12403
	6.12996
	6.13316
	6.16874
	6.17176
	6.19374
	6.19468
	6.28453
	6.3534
	6.36641
	6.36652
	6.4381
	6.55096
	6.6267
	6.66442
	6.66803
	6.68851
	6.74244
	6.81309
	6.87542
	6.94384
	6.94571
	7.06456
	7.08693
	7.10678
	7.15133
	7.24935
	7.26048
	7.30739
	7.45573
	7.46326
	7.48831
	7.57916
	7.59911
	7.61129
	7.62247
	7.63831
	7.66585
	7.73347
	7.80097
	7.85924
	7.89552
	7.91512
	7.9361
	8.04517
	8.06224
	8.08711
	8.19203
	8.25341
	8.36688
	8.40111
	8.42119
	8.44361
	8.47345
	8.65248
	8.65906
	8.68854
	8.80463
	8.96509
	8.99707
	9.03462
	9.04281
	9.14107
	9.17341
	9.23285
	9.34131
	9.35725
	9.45277
	9.45411
	9.56518
	9.62815
	9.78051
	10.0849
	10.2727
	10.4252
	11.5138
	12.0558
	12.7958
	12.9682
