# Supplementary material for: Fetal liver macrophages contribute to the hematopoietic stem cell niche by controlling granulopoiesis
Source: eLife. 2024 Mar 25;13:e86493. doi: 10.7554/eLife.86493 (PMC11006421; doi:10.7554/eLife.86493)
Supplement: Figure 4—figure supplement 1—source data 1. [file elife-86493-fig4-figsupp1-data1.xlsx]

## Sheet: Figure 4-figure supplement 1A
	Proportion (%)
Cluster A	2.61162
Cluster B	10.4681
Cluster C	3.70611
Cluster D	83.2141

## Sheet: Figure 4-figure supplement 1D
	Cluster A	Cluster B	Cluster C	Cluster D
Interaction with Ter119+ cells (%)	73	80	80.4	100

## Sheet: Figure 4-figure supplement 1E
Cluster A	Cluster B	Cluster C	Cluster D
55.4048	10.0385	9.9248	58.8692
61.2623	36.2906	37.0919	36.1067
27.4891	36.2906	36.596	6.7983
23.5225	33.5275	58.8692	26.4705
73.4515	17.0042	17.0042	43.0214
13.6405	27.781	36.1067	29.1805
30.8345	37.9776	37.9776	37.9389
19.6574	52.2768	42.1919	14.0483
9.9892	52.2768	42.0419	8.9916
18.0406	28.281	38.3906	7.6488
12.7515	40.2163	28.7632	32.9204
8.3153	40.2163	19.502	34.755
18.1196	28.7632	30.9179	18.9899
31.9606	25.21	6.7983	17.0135
12.8815	6.7983	14.2299	21.6583
38.1022	14.2299	17.5401	24.0745
37.6845	23.7031	10.2536	22.4008
21.8061	12.128	16.3828	15.4816
19.1174	12.3063	41.5891	11.8946
23.6502	22.2759	14.3978	15.1452
12.4348	11.52	14.0483	24.8266
32.8218	11.52	8.9916	16.9686
5.7119	39.5482	7.6488	30.9455
21.7066	10.941	32.9204	18.3719
17.3696	39.5482	10.941	32.5339
13.5336	18.8605	34.755	8.7115
19.3839	26.8659	18.9899	8.9316
17.2804	15.8392	29.3747	18.2686
21.3425	26.8659	26.0481	43.6393
8.319	28.2458	15.8761	34.1843
33.9652	28.2458	17.0135	38.5107
16.6093	18.9781	16.5003	40.4041
23.5853	12.4895	22.1802	37.0952
20.0869	18.9781	12.3268	33.6596
11.604	12.4895	10.3131	35.4428
13.8961	8.1825	18.6568	39.3025
54.1196	18.9781	6.0519	10.1327
12.854	8.1825	10.8104	25.3238
14.383	10.8104	21.6583	15.6946
8.5724	22.0295	22.4008	15.6692
21.8706	24.0745	8.1195	28.0189
17.5975	22.0295	15.4816	10.9673
41.7867	7.0423	23.0481	5.816
19.0074	12.8823	11.8946	26.8753
18.6061	21.874	15.1452	10.2815
10.3971	21.874	17.458	20.7227
30.3028	21.874	35.7358	14.1978
22.3326	21.874	24.8266	21.5962
14.812	24.265	16.2159	21.9425
18.7438	14.6153	16.9686	30.069
12.4994	26.3206	22.0376	33.7522
12.8488	40.2043	16.7744	27.6157
10.6626	7.4584	30.9455	24.8442
17.2681	40.2043	48.1741	16.7131
24.8267	36.0807	6.3506	13.3904
33.1279	22.8974	18.3719	18.792
61.7336	40.2043	42.9049	14.9824
22.8311	12.6087	32.5339	10.5911
23.3558	40.2043	45.3345	14.4711
45.4157	22.8974	35.2856	23.1569
12.4084	8.4431	27.4153	19.2825
11.5234	25.9702	30.8461	15.0085
25.5435	40.4986	47.2392	6.9051
13.3843	34.8307	39.9846	20.703
13.0288	26.7867	39.2852	13.7865
59.8685	34.8307	8.9316	5.5634
33.2605	34.8307	13.8358	7.5664
25.2848	13.7383	18.2686	13.9415
20.1235	32.2018	23.3878	12.3053
7.3593	13.7383	43.6393	7.4855
11.2403	32.2018	34.1843	9.7533
24.6216	26.727	32.1158	14.1967
27.9284	37.9001	28.1891	21.1621
6.9128	9.6115	38.5107	7.1879
18.9091	7.807	36.7716	15.2689
23.0286	30.1499	13.6976	34.7329
17.2052	28.3033	37.0952	8.7862
65.009	16.4636	33.6596	5.9971
13.1615	9.6771	10.5624	12.0245
28.4307	15.054	32.5183	10.1266
12.9235	18.4713	35.4428	13.0515
24.4674	33.7315	33.1965	14.1906
21.4148	10.6332	26.9703	21.1726
29.8804	9.6771	39.3025	15.377
	28.0189	9.6115	7.306
	10.9673	10.1327	13.5133
	12.0432	25.3238	21.9262
	23.942	20.9557	8.1352
	10.0381	16.0254	8.9878
	34.9651	25.0564	26.5638
	30.4275	19.0259	7.2954
	10.2815	15.0738	11.5085
	17.897	15.6946	18.4949
	17.897	28.5757	7.2286
	21.3778	33.7315	10.8652
	24.7658	15.0615	23.0727
	24.7658	7.0718	4.8608
	31.3992	15.6692	22.8548
	20.2309	28.0189	30.602
	15.0358	10.9673	25.5534
	31.3992	8.4172	33.5028
	12.3157	13.609	13.0673
	15.0358	9.8428	12.0922
	14.7079	38.371	5.8033
	15.0358	34.3936	9.4473
	15.0358	26.8753	27.7545
	12.3157	18.0275	25.3876
	12.3157	20.7227	14.3075
	25.105	14.1978	15.1728
	14.7079	21.9425	11.4413
	25.105	25.784	22.9032
	14.2195	30.069	8.0365
	20.2309	28.6365	8.2248
	25.105	16.6805	8.6621
	10.6388	33.7522	12.3964
	23.0265	27.6157	13.9999
	14.2195	17.5354	10.791
	14.6776	24.8442	13.4682
	20.2309	23.1253	6.9171
	20.2309	16.7131	5.7408
	12.3053	13.3904	20.3635
	7.4855	18.792	21.2656
	14.1874	5.7213	6.3105
	15.7918	14.9824	28.1463
	21.1621	10.5911	21.3751
	7.1879	14.4711	10.8558
	11.7208	12.8277	17.9287
	34.7329	19.8037	12.5588
	11.7208	23.1569	9.3957
	34.305	21.6878	5.86
	11.816	19.2825	11.9189
	10.6538	13.088	5.4775
	15.8099	15.0085	11.7372
	13.0515	25.3321	7.0495
	23.3615	10.6388	15.4366
	25.5563	23.0265	11.0792
	15.8099	6.9051	8.3437
	10.6538	20.703	39.4455
	7.306	13.7865	5.3008
	13.5133	7.5664	8.1542
	25.5563	6.7014	14.894
	17.9603	13.9415	7.4277
	8.0727	12.3053	18.3279
	15.8099	7.4855	14.4544
	25.5563	9.7533	8.9879
	8.1352	15.7918	8.038
	17.9603	14.1967	17.9034
	7.2954	21.1621	16.3404
	13.4259	7.1879	8.2511
	11.8135	15.2689	16.0869
	14.68	8.7862	22.8474
	15.078	40.5796	8.9447
	15.078	5.7914	10.9299
	15.078	5.9971	11.0054
	4.8608	10.1266	9.3002
	29.8026	24.879	19.6585
	29.8026	14.1906	9.3294
	29.8026	21.1726	8.0495
	22.0786	13.9397	15.7464
	15.5739	7.306	9.8516
	22.7346	13.5133	17.1765
	22.7346	18.7093	6.3129
	32.9823	21.4906	6.0409
	22.0786	24.178	10.4172
	11.9791	8.0727	6.7627
	11.9791	21.9262	19.0426
	22.0786	21.1651	16.5137
	29.8026	8.9878	10.4606
	29.8026	12.1666	12.8007
	14.3075	22.9742	11.5848
	28.2795	26.5638	12.1691
	11.315	7.2954	8.2229
	21.7927	17.3094	6.2154
	5.8903	11.5085	16.5604
	8.6621	18.3835	15.259
	10.7793	18.4949	14.4257
	22.7194	7.2286	7.4684
	22.7194	10.8652	13.9271
	22.7194	16.3883	7.5807
	12.3964	23.0727	19.5786
	10.7793	26.0173	9.6867
	13.9999	4.8608	6.9421
	12.0607	22.8548	7.7766
	16.5457	29.2267	18.9906
	5.8497	23.8415	11.7027
	14.3246	8.2702	14.3615
	20.3635	30.602	12.398
	21.2656	28.8602	7.2297
	8.6358	18.0488	9.6623
	34.2523	28.2234	7.1498
	20.3593	19.5842	14.7823
	20.3593	25.5534	16.41
	21.2893	18.2949	6.9852
	14.8575	33.5028	5.2931
	46.051	35.5568	8.6205
	13.0497	13.0673	16.2469
	6.8899	12.0922	10.6092
	12.7653	5.8033	7.3865
	12.4711	9.4473	21.0496
	14.4904	27.7545	6.6408
	12.233	25.3876	11.5111
	12.7653	19.096	15.3368
	41.4676	29.8985	23.5004
	13.0964	15.1728	14.3703
	26.5169	11.4413	35.0856
	27.5231	5.8903	21.8103
	58.2254	8.0365	14.7754
	27.9887	8.2248	18.5931
	27.9887	8.6621	17.5049
	29.3611	8.3945	18.8605
	15.3886	13.8712	23.3357
	45.0176	22.1929	5.1163
	11.0822	12.3964	10.0302
	45.0176	13.1641	9.0849
	43.014	13.9999	18.3722
	21.527	10.791	5.247
	29.0765	13.4682	5.1657
	12.3674	18.1291	20.1158
	10.075	4.7823	25.7295
	12.3674	6.9171	10.1071
	9.1885	5.7408	7.1386
	18.5436	11.8086	23.4365
	6.8037	6.3105	27.3501
	14.046	28.1463	28.7561
	9.3053	21.3751	9.8437
	12.0359	19.3435	28.0873
	36.9403	20.549	5.4256
	9.3053	6.9707	5.4695
	8.1542	10.8558	26.7662
	9.5045	17.9287	13.9307
	14.3766	17.0391	10.7231
	14.3766	12.5588	7.2263
	15.1286	6.8899	22.9023
	8.038	9.3957	39.1441
	14.0743	9.3751	32.5562
	24.1832	21.6334	9.768
	50.5419	5.86	9.3075
	12.9556	11.9189	13.8492
	12.0266	44.9232	8.5013
	12.9556	13.0964	6.6704
	12.0266	26.5169	11.529
	12.3623	27.5231	20.0903
	6.6428	56.6797	10.882
	8.3721	5.4775	5.1042
	22.7054	31.1532	6.4
	22.7054	24.8242	7.6826
	22.7054	27.2545	16.2121
	9.3294	29.1767	19.0983
	19.8237	5.99	13.8304
	18.2442	14.264	6.7933
	14.4906	25.0387	23.3709
	15.7464	40.5186	6.9984
	8.3134	15.4366	10.6483
	9.8516	49.5166	6.5508
	12.6725	38.5805	7.4719
	7.4595	26.6429	7.8459
	6.104	29.0765	7.1025
	13.2318	10.6672	7.6677
	13.0941	12.0498	8.3867
	10.9969	15.4045	23.4231
	13.6942	9.1885	20.6708
	14.808	18.5436	19.208
	14.808	7.0287	16.0676
	10.948	17.7621	28.6848
	21.8582	17.0128	6.7936
	11.5848	11.0792	29.0176
	11.3003	9.0562	25.1269
	5.1527	8.3437	6.5606
	8.2229	13.5522	13.2783
	11.9882	39.4455	17.678
	14.0429	5.3008	15.8809
	21.4333	8.1542	8.4062
	14.0429	14.894	12.5631
	28.8947	7.4277	24.0161
	14.0429	18.3279	16.35
	7.4641	15.0688	23.6149
	14.3262	13.855	7.7195
	11.2902	14.2059	12.6095
	14.3272	6.7941	6.7357
	11.2902	14.4544	10.8661
	17.577	8.9879	17.6565
	13.2939	20.4668	29.26
	16.4162	8.038	24.616
	16.4162	16.3404	13.6675
	17.7122	6.6101	9.3617
	13.2939	50.5419	6.8231
	13.4786	15.5163	19.1716
	12.0211	9.5645	8.5122
	8.937	8.2511	17.7036
	12.0211	16.0869	6.5505
	12.0211	22.8474	11.9959
	13.1138	15.7799	16.044
	10.2139	11.0054	7.67
	9.1239	6.6428	13.1158
	18.4015	8.3721	10.891
	20.2057	24.514	6.4661
	20.7968	23.2744	6.0523
	8.209	19.6585	7.8092
	10.9624	9.3294	5.6759
	11.277	8.0495	6.4962
	7.1843	19.401	14.0041
	41.4676	23.634	12.3644
	6.9618	16.538	6.6657
	21.1403	14.646	16.5675
	38.4717	15.7464	7.5139
	14.7754	9.4201	8.9628
	10.547	6.0409	9.3702
	16.1876	6.104	9.4866
	16.1876	10.4172	10.9316
	16.1876	6.3709	6.5928
	16.1876	6.7627	12.8873
	20.7071	22.1213	16.7451
	18.7572	10.4812	17.2798
	9.9928	19.0426	18.7326
	27.0706	16.5137	4.9315
	5.1163	10.4606	11.7015
	8.3943	16.5876	17.507
	23.5471	11.5848	10.7983
	10.0302	12.1691	9.5962
	20.1158	5.1527	14.3422
	13.6659	6.2154	5.3944
	17.8754	16.5604	9.7823
	7.6364	15.259	15.7166
	23.7864	20.866	7.031
	17.9227	14.4257	5.4913
	27.3501	28.8947	9.8247
	30.8904	7.4684	6.5077
	8.4891	7.4641	7.9087
	13.2982	13.9271	13.8671
	8.4891	14.3262	9.0881
	17.7976	7.5807	8.4884
	8.0963	19.5786	9.8609
	22.536	9.6867	7.6416
	9.9671	7.7766	12.0452
	30.1312	18.9906	17.1651
	17.7976	15.4066	6.7504
	10.1784	11.7027	13.7293
	10.1784	22.893	18.4965
	13.0325	21.3127	9.7353
	17.1671	17.7122	27.5752
	11.124	14.3615	11.6657
	13.0325	12.398	16.6178
	15.3784	7.2297	7.162
	13.0325	9.6623	8.4163
	11.0093	15.5297	8.906
	8.983	13.8321	5.8335
	12.7911	7.1498	31.2809
	11.0093	14.7823	6.1546
	8.983	16.41	11.8524
	11.0093	8.6205	4.598
	8.983	10.6092	15.8729
	20.2746	16.7795	18.8129
	11.0093	21.0496	12.275
	20.9606	26.3887	23.5587
	11.8625	6.6408	11.0021
	20.2746	15.3368	12.2555
	11.0093	23.5004	7.3436
	23.6555	14.3703	5.8736
	6.7933	7.1843	6.7286
	21.0657	71.7549	11.6194
	11.8625	28.3608	9.1509
	13.5934	6.9618	21.912
	8.8496	35.0856	16.0976
	15.2861	20.56	11.877
	8.8496	21.8103	8.2454
	8.1141	21.1403	6.2045
	7.6677	38.4717	8.5356
	8.3867	5.7175	9.018
	24.9698	14.7754	22.4917
	15.3822	11.9837	7.8176
	24.9698	18.5931	5.1406
	24.9698	21.4211	15.008
	15.3822	20.8491	17.1276
	10.2887	17.5049	14.8986
	24.9698	22.5536	12.1508
	10.0912	18.8605	19.5117
	13.2783	23.3357	18.3002
	14.2012	7.6913	12.1448
	16.1945	27.0706	4.8771
	8.4062	19.7658	19.3301
	17.1603	5.1163	20.2173
	17.1603	9.7391	19.3913
	16.1945	23.5471	6.3817
	17.1603	10.0302	8.4103
	17.1603	9.0849	8.5632
	10.583	18.3722	13.7385
	8.928	5.247	8.9813
	8.928	5.1657	12.0766
	6.5359	20.1158	5.7555
	17.1603	13.3443	5.431
	15.0168	25.7295	8.0976
	8.9161	10.1071	8.8048
	15.0168	7.1386	7.5264
	15.9986	23.4365	9.019
	15.0168	16.2483	14.3036
	7.5518	27.3501	6.2474
	15.9986	28.7561	12.0648
	13.7302	9.8437	16.2106
	13.2007	6.1436	5.588
	15.9986	11.7851	25.8818
	15.9986	28.0873	21.7769
	14.369	5.4256	14.5411
	9.8135	5.4695	6.5417
	14.369	26.7662	13.5033
	14.6962	13.9307	18.2293
	12.9284	10.7231	11.6358
	12.9284	35.1927	16.4396
	12.9284	10.4902	8.4112
	19.2163	7.2263	6.2812
	19.29	13.1306	32.1429
	19.29	14.8272	11.3905
	13.1158	17.1671	6.2455
	7.9129	7.9427	22.8232
	10.7757	39.1441	11.6685
	7.1376	32.5562	14.9976
	7.9129	20.365	16.9178
	8.8275	9.768	16.8965
	14.0041	9.3075	16.3016
	7.9129	34.7707	14.7973
	7.3674	13.8492	5.6682
	12.6471	8.5013	9.5487
	14.5215	6.6704	14.8568
	14.5215	9.4643	11.6644
	7.328	18.2889	27.8263
	15.3213	24.4492	6.7925
	10.2697	11.529	20.71
	18.2599	9.8391	6.2053
	14.5215	20.0903	24.5401
	8.488	10.882	16.5332
	7.5139	6.4	17.6608
	10.124	19.5659	19.8647
	10.4405	7.6826	17.8226
	8.9935	24.9843	14.9328
	8.9935	11.2231	10.29
	10.7899	8.3942	6.7984
	10.124	19.0983	4.7172
	4.9561	13.8304	7.2334
	14.6554	6.7933	7.749
	14.6554	23.3709	6.8223
	10.124	6.9984	14.1324
	6.7143	10.6483	13.4687
	10.124	11.2295	30.3371
	14.6554	6.5508	29.4806
	16.4112	15.2861	7.2784
	14.808	7.4719	20.7026
	14.7983	7.8459	21.3931
	10.8535	7.1025	7.4495
	14.9067	7.6677	5.8811
	14.9067	8.3867	26.3672
	10.8535	23.4231	7.1239
	14.808	11.7159	19.6853
	13.0476	33.2429	4.6711
	10.6361	20.6708	6.0712
	6.6059	19.208	8.932
	8.7409	16.0676	9.074
	10.6361	28.6848	6.7787
	8.7882	6.7936	6.1908
	8.7882	34.0271	12.4833
	8.6404	10.6918	7.348
	13.1531	29.0176	7.3132
	7.0073	25.1269	8.3159
	9.8396	6.5606	18.3216
	18.4965	13.2783	15.258
	10.9209	17.678	6.0464
	25.8403	15.8809	15.1128
	12.7394	8.4062	10.8839
	15.0897	18.1296	8.7093
	8.1697	12.5631	14.1451
	9.5605	16.1377	5.6454
	15.0897	24.0161	12.2588
	9.5605	16.35	16.9355
	8.1697	10.583	10.4035
	6.6904	9.6981	5.8674
	8.1697	6.6094	17.0361
	6.0283	23.6149	15.3888
	17.1483	7.7195	24.7895
	16.2108	12.6095	10.8184
	13.6369	18.8883	12.3988
	12.5984	6.7357	14.6363
	11.0021	10.8661	14.7768
	9.3976	17.6565	7.8631
	12.1271	15.8764	14.9421
	10.6594	17.9022	14.617
	10.6594	40.4071	16.7217
	10.6594	29.26	20.9211
	10.6594	24.616	17.6824
	12.1271	13.6675	28.9581
	15.6619	18.9509	18.6544
	10.6594	9.3617	20.2652
	15.6619	22.3615	19.7788
	11.877	6.8231	16.7806
	8.6317	11.8851	8.298
	6.4734	19.1716	9.2959
	11.4361	8.5122	15.6922
	10.1414	19.2538	17.3306
	17.1584	10.806	11.9333
	8.6317	4.8541	14.081
	17.1584	17.7036	23.7279
	15.6619	11.1147	10.0802
	7.4051	6.5505	6.4661
	17.1584	14.7277	25.8222
	15.008	11.9959	6.1772
	15.2932	16.044	7.7282
	12.7243	19.2163	7.6822
	13.2796	7.67	17.9448
	11.157	17.2346	14.0841
	12.1146	13.1158	6.8755
	13.9901	10.891	8.6502
	13.9901	6.4661	37.1204
	13.9901	6.0523	8.2824
	6.4737	7.8092	34.1941
	13.9901	5.6759	7.5775
	13.9901	6.4962	22.1256
	9.7562	14.0041	16.0475
	19.048	8.6537	6.1676
	13.1138	5.9828	12.6578
	9.7562	8.1026	15.9714
	8.5394	12.0388	18.172
	13.9192	12.3644	7.6226
	9.2663	6.6657	18.1223
	9.7562	9.8119	11.0727
	14.3163	10.2697	14.489
	14.3163	16.5675	20.5212
	27.4726	7.447	11.9851
	9.2663	7.5139	9.7863
	14.3163	19.2063	11.5684
	15.2863	8.9628	9.0794
	8.3897	9.3702	17.7715
	16.07	9.4866	12.2805
	14.3163	10.9316	6.3174
	14.3163	6.624	7.3077
	16.07	6.5928	6.5153
	8.5773	4.9561	13.4218
	11.9867	12.8873	6.0564
	17.5443	16.7451	21.2474
	14.2267	17.2798	9.9094
	14.617	18.7326	23.8855
	12.8848	4.9315	17.3345
	12.8848	11.7015	15.0463
	14.617	17.507	7.1347
	8.4112	10.7983	12.0259
	10.9624	9.5962	19.1473
	33.9637	6.5958	10.4977
	12.8961	14.3422	8.1519
	14.617	5.3944	8.0303
	11.9711	7.031	15.8364
	7.6114	11.1025	10.5506
	10.3834	9.3188	10.5841
	29.2464	18.8896	23.1984
	46.9857	6.6059	6.6255
	16.599	8.7409	17.0403
	12.3757	5.4913	37.289
	15.8119	9.8247	26.002
	34.1396	6.5077	17.4862
	34.1396	13.8671	44.8247
	34.1396	9.0881	18.4598
	11.6644	8.4884	6.1833
	7.8797	9.8609	18.0356
	11.2155	7.6416	10.0108
	26.1538	12.0452	7.288
	17.1483	17.1651	20.1184
	24.5401	6.7504	20.0569
	17.1483	8.4353	13.8029
	21.0973	18.4965	19.8595
	21.0973	9.7353	16.2145
	21.8656	27.5752	19.272
	10.3635	11.6657	10.6525
	6.7984	16.6178	46.1065
	12.6926	9.7639	10.0444
	15.3172	7.162	20.2358
	12.8992	10.6656	38.1353
	5.9753	8.4163	20.5601
	5.9753	7.026	16.6948
	7.018	8.906	15.9921
	12.2233	5.8335	14.6912
	12.2233	31.2809	20.8603
	6.7262	6.1546	10.455
	12.2233	11.8524	7.2131
	6.7262	4.598	16.18
	29.9088	19.5648	8.3519
	10.4781	15.8729	7.8102
	11.9322	18.8129	26.0554
	16.7608	12.275	21.933
	11.9322	23.5587	10.3657
	22.1848	11.0021	27.8674
	7.4495	11.2953	17.6882
	22.1848	12.2555	6.9076
	22.1848	7.3436	26.3259
	5.8811	5.8736	6.6814
	12.061	6.7286	12.7487
	12.061	11.659	9.7259
	12.061	15.8292	11.6185
	16.1189	15.884	18.4156
	8.7897	11.6194	12.3868
	12.2762	9.1509	12.549
	12.2762	21.912	4.9705
	11.118	10.1029	7.9468
	8.932	16.0976	9.3356
	12.2336	11.877	25.4249
	8.8985	18.0273	4.8355
	15.6182	8.2454	23.9658
	6.7787	6.4734	12.9374
	10.9288	17.3301	12.3703
	11.1046	6.2045	9.5016
	21.9275	8.5356	7.2152
	6.1908	9.018	20.3318
	10.4307	22.4917	15.9575
	9.7762	7.8176	16.5595
	7.4795	5.1406	32.8851
	11.7728	15.6781	11.3874
	11.7728	15.008	11.6185
	7.7015	17.1276	11.3771
	7.7015	12.7243	33.4373
	7.7015	14.8986	14.7234
	11.7728	15.1494	11.5143
	11.7728	12.1508	13.7682
	10.0936	19.5117	20.2277
	10.0936	18.3002	5.8981
	27.0942	10.6215	14.1312
	12.8919	4.8771	20.0514
	10.8839	19.3301	19.7436
	12.7653	18.4385	32.1789
	12.7653	5.9145	16.6589
	30.8664	20.2173	5.0011
	15.6955	19.3913	19.7498
	18.251	8.4103	7.3054
	30.8664	14.3178	11.3001
	12.6795	8.5632	9.2679
	6.6089	13.7385	5.2759
	13.0497	8.9813	33.8185
	12.233	12.0766	23.2504
	13.7118	6.509	5.994
	30.8664	5.431	6.117
	12.061	8.0976	14.4783
	10.2271	8.8048	6.1447
	6.0563	9.019	7.0248
	18.1074	14.3036	22.4158
	18.1074	16.2997	10.392
	11.8683	6.2474	23.2952
	11.8683	12.0648	18.2144
	15.2572	16.2106	15.2954
	12.4931	14.8206	21.9087
	11.8683	8.3897	6.4633
	13.4195	5.588	21.0214
	11.8683	14.6115	23.4356
	15.2572	12.0022	20.5286
	12.6795	21.7769	13.2468
	28.9581	14.5411	31.0281
	14.5827	6.5417	12.7258
	11.8683	13.5033	5.9432
	17.7201	18.2293	19.2413
	17.7594	11.6358	17.855
	10.952	6.6341	5.7812
	14.5827	16.4396	37.3156
	18.2523	11.1456	8.3781
	11.8683	9.4133	6.4903
	11.8683	8.4112	7.2511
	12.233	32.1429	29.7733
	14.5827	11.3905	8.7408
	13.6049	22.8232	7.2254
	14.5827	20.8805	10.6815
	12.233	17.3818	12.3993
	14.5827	11.6685	16.1359
	25.898	14.9976	20.6501
	14.5827	16.9178	16.9881
	20.5254	13.1293	19.7194
	25.0644	33.2383	21.3543
	37.4614	45.0728	29.4996
	10.0802	16.8965	16.9406
	20.5254	16.3016	9.4323
	7.2922	12.3757	36.4028
	25.8222	14.7973	7.8138
	8.3053	5.6682	16.566
	7.2922	31.9146	6.9103
	14.5297	9.5487	12.8423
	23.6719	38.2673	7.9762
	14.0699	11.6644	7.0403
	17.3402	27.8263	10.465
	35.3839	15.4945	18.7075
	7.5775	13.1798	19.8985
	11.9483	11.9466	9.83
	11.9483	25.4315	14.7351
	11.5929	20.71	23.9141
	8.7897	6.2053	19.6123
	21.8461	24.5401	11.9597
	21.8461	11.1701	31.5149
	7.6226	16.5332	12.4437
	19.0656	11.1766	6.9186
	18.2665	23.2312	9.523
	8.7195	19.8647	8.0058
	19.0656	10.29	22.0958
	16.3689	12.6926	15.0631
	11.0805	15.8166	30.1934
	16.3689	13.7156	21.1559
	21.4451	4.7172	27.5955
	21.174	7.2334	25.2877
	13.2675	5.6976	7.2905
	17.7893	6.8223	23.5717
	16.3689	13.4687	22.361
	9.7863	7.5912	21.3402
	13.2675	10.2527	23.4798
	21.4451	5.8612	12.2201
	13.2675	30.3371	12.6926
	14.695	29.4806	19.2584
	12.355	7.2784	18.3503
	18.6981	8.797	16.4375
	12.4793	12.669	5.0657
	8.6419	20.7026	11.8294
	12.4793	15.0082	19.4359
	27.7404	7.4495	17.9079
	12.4793	15.3805	19.9573
	18.6981	29.7808	11.5698
	17.8738	5.8811	9.1424
	27.7404	16.1132	16.9403
	11.6656	8.8171	11.7114
	27.7404	10.7926	37.3202
	17.8738	12.9035	25.8427
	16.5071	13.4904	27.8559
	12.2762	5.425	6.8355
	23.1713	8.932	8.1804
	16.3805	11.4201	8.032
	27.7404	9.074	25.4161
	13.9457	15.6182	7.1859
	38.3025	6.7787	13.7934
	24.1797	5.7384	31.1631
	42.0758	9.1708	12.9638
	6.888	21.602	9.3001
	15.0958	6.1908	14.2627
	14.9508	12.4833	26.0431
	24.1797	7.3132	22.6257
	17.0403	8.3159	8.1514
	19.9391	18.3216	26.9998
	24.1797	8.2004	26.9081
	24.1797	6.0464	19.7227
	20.0239	10.1975	28.6944
	20.0239	9.367	20.647
	19.9391	11.1377	14.7328
	24.1797	15.7669	9.617
	24.1797	6.7727	31.0489
	24.1797	15.1128	12.0816
	8.2227	27.0942	34.0445
	19.9214	14.7502	22.9842
	19.9391	10.8839	8.1988
	22.9285	5.9786	19.3437
	19.9391	11.4768	9.7772
	17.5084	14.1451	22.5761
	10.9324	5.6454	7.8929
	22.9285	35.5118	6.905
	22.9285	12.2588	12.5558
	16.1624	41.0071	8.124
	36.6086	16.9355	25.0652
	13.0645	33.5965	6.9837
	20.7913	22.364	16.414
	13.0645	10.4035	5.7319
	10.0444	13.5869	12.2399
	19.9465	5.8496	27.6249
	12.6096	5.8674	8.9005
	28.3074	17.0361	11.7812
	19.9465	14.6714	6.4726
	16.6948	15.2834	10.1027
	29.8384	15.3888	6.9621
	9.1919	24.7895	7.3847
	20.8603	10.8184	15.6733
	14.1349	12.3988	9.607
	14.1349	18.3995	7.7541
	29.8384	6.0563	5.5803
	29.8384	14.6363	6.3407
	11.535	15.9076	17.2893
	14.4767	14.617	8.0899
	11.535	14.0844	12.2108
	23.9942	5.3308	31.5396
	23.9942	20.9211	6.2666
	14.5095	13.4195	13.4254
	29.8384	8.0921	27.7311
	13.1779	17.6824	11.2579
	6.9076	11.7485	17.1374
	28.8664	28.9581	12.9097
	26.3259	18.6544	22.3641
	6.6814	12.265	16.2383
	22.8624	17.7201	5.6353
	15.195	12.95	16.5071
	15.195	10.952	12.8454
	15.195	18.7916	9.722
	10.6044	18.9883	20.1039
	14.5095	20.3281	11.1356
	8.6405	15.3276	6.1361
	15.195	20.2652	10.9316
	14.5095	19.7788	15.6422
	14.5095	16.7806	7.8959
	31.484	8.298	6.4221
	11.5159	9.2959	13.9108
	14.5095	17.3306	6.498
	16.0041	11.9333	8.5618
	14.5095	25.898	14.7725
	13.1779	14.081	9.7431
	17.2301	8.6707	10.4312
	13.1779	23.7279	7.1519
	11.5159	21.7928	15.4206
	18.8846	37.4614	9.9205
	16.2789	10.0802	9.7021
	12.3757	25.2453	10.1143
	13.1779	6.4661	7.5858
	18.5499	25.8222	15.6641
	16.2789	6.1772	7.2193
	18.5389	11.8477	7.0388
	18.5389	7.7282	13.1845
	7.2152	7.6822	23.8006
	6.9039	17.9448	9.3567
	20.3318	15.3536	8.7416
	18.5389	27.8155	17.766
	11.3049	13.9778	9.1355
	6.9039	6.8755	12.3703
	18.5389	8.6502	5.7201
	25.6127	19.5283	18.5603
	11.697	37.1204	19.6736
	11.3049	8.2824	29.8442
	11.697	34.1941	7.9306
	11.697	25.2487	19.2865
	6.7462	7.5775	12.8168
	11.3771	21.9984	15.2619
	17.1545	16.0475	15.4302
	13.8686	13.3419	11.8925
	8.2496	6.1676	11.0979
	25.4329	12.6578	9.3663
	14.3829	22.1343	6.4573
	8.2496	15.9714	19.7279
	8.2496	10.2458	10.6978
	13.5777	19.7044	13.1584
	10.2838	18.172	5.7972
	14.3695	7.6226	28.9458
	22.0176	18.1223	13.1623
	12.6768	18.2536	11.5111
	22.0176	8.7195	6.2805
	8.0684	11.0727	11.0754
	22.0176	25.5223	16.014
	7.3054	14.489	15.8819
	10.2838	20.5212	16.1589
	9.3198	25.5401	15.5316
	10.2838	23.745	12.2494
	9.2679	23.4904	14.534
	33.8185	17.2281	10.3674
	22.3305	9.5414	15.3934
	10.3383	11.9851	6.1576
	8.3592	16.5	9.7239
	22.4158	9.7863	7.3035
	10.3383	20.8493	6.0192
	22.3305	13.6133	21.0664
	22.6358	5.9841	12.5949
	19.4288	11.5684	22.9888
	8.3592	15.646	10.9413
	9.2122	9.0794	7.1387
	17.2528	17.7715	9.772
	21.9677	12.355	15.8836
	9.2122	12.2805	12.6159
	17.2528	19.069	14.4111
	15.3258	14.0927	6.9721
	9.7861	6.3174	13.5685
	34.7986	7.3077	8.8266
	17.2528	38.7189	14.672
	9.7861	6.5153	20.7329
	17.2528	16.0374	12.1166
	5.7812	6.0564	6.3891
	18.6521	21.2474	8.7061
	13.5766	29.2098	6.4385
	15.0711	9.9094	25.3006
	10.4307	19.4075	9.3456
	13.5766	23.8855	21.901
	14.7041	15.0463	8.7611
	10.5745	8.4383	6.7695
	18.341	7.1347	18.2942
	30.2847	12.0259	13.9377
	26.2156	16.3805	18.7674
	13.5766	19.1473	10.9097
	18.341	10.4977	11.3166
	12.148	43.8488	6.9988
	15.0711	12.0703	11.2235
	7.4795	8.1519	8.6709
	12.148	6.9176	5.8812
	15.0711	15.8364	7.6345
	26.164	43.9576	11.1158
	22.941	6.9053	17.8797
	12.148	10.5506	11.0416
	12.148	17.0659	13.8782
	22.941	10.5841	19.1838
	14.855	6.982	10.0804
	10.5745	26.8962	6.7884
	19.7194	6.6255	6.4694
	22.941	17.0403	10.2907
	26.164	37.289	20.8487
	10.5745	41.8696	19.1091
	14.4358	26.002	7.6629
	10.5745	15.6614	17.0833
	10.5745	46.3316	6.4633
	11.7728	19.8701	15.4105
	6.9103	44.8247	11.4523
	13.7139	20.8633	20.5344
	10.5745	14.4326	12.3595
	18.1471	18.4598	14.4416
	13.7139	6.1833	9.0194
	11.1759	26.753	8.5164
	26.164	26.6856	34.0703
	21.0487	18.0356	7.0487
	11.1759	10.0108	9.3262
	13.7139	7.288	9.8118
	14.7351	20.1184	17.4878
	18.1471	20.0569	26.0259
	21.0487	13.8029	6.4855
	13.7139	19.8595	21.7954
	18.1471	16.2145	17.981
	26.164	36.6086	19.4495
	13.6649	19.272	6.2123
	13.6649	25.5192	20.2936
	11.3731	10.6525	9.8845
	13.6649	46.1065	18.3363
	13.6649	10.0444	5.8577
	11.7728	20.2358	16.8248
	12.5393	7.963	4.8042
	34.0807	20.5601	5.8273
	13.6649	16.6948	11.6582
	13.6649	20.8556	15.2382
	16.2295	15.9921	10.9251
	23.2218	9.1919	6.5059
	17.5064	14.6912	14.8749
	34.0807	20.8603	17.225
	24.9236	10.455	5.7245
	21.8546	16.18	15.5278
	20.0621	28.5556	8.0983
	24.9236	38.496	12.1414
	16.0577	15.2597	7.5887
	19.3756	8.3519	8.8092
	11.9961	7.8102	21.172
	16.6336	37.0918	10.0052
	14.9026	26.0554	7.2586
	15.4561	21.933	11.8965
	11.9961	10.3657	14.4065
	8.6236	33.3178	11.1761
	10.0936	27.8674	10.2865
	14.9026	28.2171	8.7837
	15.4359	23.5106	8.6386
	16.7168	26.3259	20.7456
	15.4359	6.6814	5.3942
	15.4359	22.8624	16.1673
	18.7073	13.7738	12.3418
	9.6809	9.7259	14.4782
	15.4561	18.8648	21.6956
	12.4271	11.6185	27.5174
	21.8546	14.507	19.0731
	15.4359	10.1214	28.8197
	18.8421	18.4156	27.9662
	29.2059	19.169	16.7492
	19.0854	12.3868	26.9537
	11.7114	37.7194	30.2818
	18.8421	12.549	27.3406
	31.7117	18.2008	17.6084
	15.4359	6.7928	5.7994
	31.7117	4.9705	5.3741
	11.5256	7.9468	8.0682
	31.7117	9.3356	42.8803
	31.7117	22.0219	31.8936
	23.7391	5.0167	5.9414
	30.7865	4.8355	14.0234
	23.7391	11.1227	35.5652
	23.7391	23.9658	12.3927
	15.4365	18.4865	19.0888
	15.4365	16.6962	13.3649
	21.3073	12.9374	15.4075
	15.4365	9.9655	7.7573
	18.3137	12.3703	8.4098
	21.3073	9.5016	14.9039
	18.3137	23.7221	9.3563
	21.3073	7.2152	12.7417
	26.4719	7.4283	11.6655
	21.3073	20.3318	19.3619
	18.3137	15.9575	17.6978
	10.658	16.5595	13.7618
	10.658	6.3794	10.4017
	26.4719	24.9747	10.4389
	18.3137	32.8851	14.3431
	26.4719	16.5993	5.5368
	18.3137	11.3874	13.3398
	18.3137	10.6148	5.7211
	18.3137	11.6185	9.0113
	18.3137	6.6079	17.3274
	10.181	11.3771	6.6306
	18.3137	17.5751	12.9865
	18.3137	9.5742	5.4306
	21.6934	13.8686	7.7364
	8.1988	13.6402	8.0705
	9.6527	10.1573	15.3147
	21.045	33.4373	8.2807
	36.4053	13.7682	12.8326
	7.242	5.8981	6.1055
	10.9624	7.4197	8.7879
	13.568	14.1312	17.5977
	18.3655	17.2113	5.8149
	18.4015	19.7436	13.177
	8.209	5.2895	11.1463
	10.9624	8.402	4.7035
	11.277	9.2156	5.7174
	21.3486	16.6589	10.6844
	8.4453	5.0011	11.5011
	11.948	8.0684	15.6731
	15.0167	19.7498	12.0126
	26.516	25.7895	10.2475
	12.2399	7.3054	14.9162
	26.516	12.7924	5.1566
	14.1301	7.945	7.6164
	7.0796	9.2679	10.1019
	10.1027	5.2759	10.1458
	6.9621	23.2504	7.8694
	13.6697	6.117	7.2843
	13.6697	14.4783	8.8325
	13.6697	7.0248	14.4897
	13.6697	22.4158	9.049
	10.9051	10.392	7.0672
	5.5803	23.2952	25.3868
	14.5297	18.2144	12.8789
	11.5833	6.4633	18.3412
	33.7441	6.344	12.4669
	47.8323	26.0524	7.4815
	13.2929	21.0214	44.9623
	27.7311	14.7752	15.2056
	13.2929	25.4802	18.1613
	11.2579	9.8189	21.7803
	17.1374	23.4356	10.6593
	10.9246	20.5286	10.5919
	12.2639	19.0324	7.5495
	12.9097	13.2468	5.9284
	19.7323	31.0281	4.9433
	11.7224	12.7258	9.2085
	18.6981	5.9432	10.1065
	24.8638	19.2413	19.378
	21.5105	17.855	17.7411
	17.5809	5.7812	7.7456
	24.8638	37.3156	27.3856
	8.0723	13.828	21.583
	7.3614	17.2978	22.5212
	10.1364	8.3781	24.5816
	17.566	16.9823	23.4896
	10.5592	18.0223	22.6316
	13.451	7.2511	27.8161
	14.412	29.7733	14.7003
	13.451	20.5212	9.3287
	14.412	9.5437	8.8547
	14.412	20.1663	8.6794
	13.451	8.7408	16.4479
	14.412	7.2254	14.8151
	11.1566	7.6459	11.2026
	14.412	10.6815	5.7633
	11.1358	12.3993	5.4855
	12.2578	16.1359	19.5395
	13.5932	20.6501	7.1601
	10.4312	19.8364	14.931
	9.7433	12.0089	13.16
	10.0166	26.4582	20.7702
	10.1143	16.9881	13.7441
	9.7433	10.8355	14.734
	9.7433	19.7194	25.2578
	18.6516	21.3543	19.4807
	7.2193	9.8877	11.9945
	7.0388	22.8205	12.2638
	18.6516	16.9406	6.5893
	9.7433	36.4028	17.6423
	16.4448	7.8138	17.9894
	9.3567	15.1005	14.408
	10.8776	6.9103	16.0357
	17.766	7.9762	15.873
	9.1159	15.7581	15.7188
	14.9818	7.0403	20.4614
	12.6306	8.5758	19.8562
	14.9818	10.465	14.9216
	16.1624	19.8985	22.3353
	14.9818	11.8867	21.9461
	29.8442	9.83	17.1466
	7.9306	14.7351	19.1202
	14.0699	14.6215	10.3619
	10.8776	19.6123	10.4459
	14.0699	11.9597	15.4787
	14.4493	12.4437	5.8024
	12.0111	6.9186	9.9195
	14.4493	35.0736	5.2229
	8.8509	8.0058	20.9359
	12.0111	18.8767	11.2115
	14.4493	9.7399	6.8948
	12.0111	12.4677	22.9364
	13.7633	22.0958	21.4985
	11.8442	13.2562	12.0745
	12.0111	15.0631	16.065
	21.4538	30.1934	5.7621
	11.8084	15.5874	6.4058
	6.9338	12.8333	16.48
	11.8084	22.5391	16.33
	14.4493	21.1559	12.5839
	21.4538	27.5955	18.1919
	11.8084	37.9679	9.3915
	15.5077	25.2877	13.127
	9.3239	23.3261	11.4403
	13.1779	36.9943	7.0218
	21.032	7.2905	7.4642
	12.3106	7.6748	10.2771
	21.032	23.5717	7.8037
	11.1885	22.361	6.72
	7.8401	21.3402	15.7231
	12.7984	13.2679	7.2079
	8.3393	29.1	7.2964
	12.9664	23.4798	6.5493
	15.4931	12.2201	8.7429
	11.2809	18.5544	9.5468
	15.4931	13.8661	18.9513
	11.8176	12.4128	23.6577
	13.5685	16.671	7.111
	13.1779	19.2584	14.4376
	11.2074	18.3503	12.7599
	11.2809	16.4375	7.9103
	15.4931	5.0657	20.4845
	11.8176	9.634	6.6665
	16.909	14.9385	27.0069
	11.8176	24.7933	13.9773
	6.3891	16.7673	22.8335
	11.8176	19.4359	13.2499
	11.8176	17.5327	18.7487
	25.2312	25.7256	11.4396
	16.3312	18.7073	19.5138
	8.4593	9.3621	15.3805
	19.3756	17.9079	10.422
	15.359	19.9573	11.0379
	6.7695	19.0369	5.2165
	12.5692	11.5698	8.7958
	12.1117	9.1424	11.3638
	15.359	17.2948	10.7201
	15.359	24.3282	11.1719
	8.9623	16.9403	7.8589
	8.1527	37.3202	31.3224
	12.9424	29.5926	20.4147
	8.1527	33.9581	24.6522
	8.9623	27.8559	16.0036
	11.0416	24.3697	7.297
	8.9623	28.4533	15.7249
	12.9424	6.8355	12.4708
	9.3716	26.163	25.7575
	15.1028	20.6848	13.8722
	8.3249	8.1804	9.3448
	21.9677	8.032	16.2818
	8.3249	14.5602	6.838
	8.3249	24.2015	17.6274
	18.7921	16.1912	8.9694
	21.9677	25.4161	10.5861
	6.4633	16.2824	6.54
	9.0194	7.1859	19.4203
	16.7334	11.9479	20.9214
	26.2156	21.4708	12.814
	11.0259	13.7934	19.2326
	9.7865	31.1631	6.4359
	26.2156	9.3001	18.1977
	9.7865	7.0533	18.0894
	9.5046	7.667	11.1482
	14.1962	26.0431	15.5768
	12.1328	22.6257	10.4115
	12.1328	26.9998	9.0503
	18.1089	23.6945	5.8662
	9.0549	26.9081	12.3236
	12.1328	19.7227	5.3101
	12.1328	20.6999	18.4993
	18.8213	28.6944	23.8634
	12.8134	8.9711	23.2088
	6.4931	20.647	6.604
	16.3825	15.7032	8.3596
	6.4989	14.7328	13.6642
	23.0772	9.617	12.9915
	16.8248	12.0816	10.7304
	4.8042	34.0445	5.8822
	5.8273	28.4717	17.2112
	10.9253	17.187	7.8983
	10.9253	22.9842	12.3203
	21.108	26.0047	5.2275
	11.9512	15.6125	9.1902
	17.378	36.4053	5.821
	17.378	7.242	9.9375
	8.006	13.2393	17.5229
	17.378	10.3226	7.0593
	16.5231	20.0236	14.4237
	16.9978	19.3437	25.2964
	16.9978	9.7772	31.8204
	11.4932	22.5761	10.2875
	10.4594	7.8929	5.5347
	16.9978	6.905	7.9994
	16.9978	12.5558	8.8021
	7.5887	21.3486	5.3812
	16.5231	25.0652	22.1132
	16.9978	6.9837	16.363
	12.8566	11.948	23.2869
	15.7201	16.414	7.3625
	13.1026	5.7319	11.5741
	13.1026	23.4271	11.0688
	16.9978	25.4072	24.6563
	9.9074	10.4807	15.4873
	15.7201	12.2399	18.3956
	15.7201	27.6249	14.9968
	8.7837	11.7812	7.1351
	9.9074	6.4726	11.8757
	15.7201	10.1027	8.4624
	5.3942	6.9621	7.6959
	10.8185	15.6733	12.8908
	16.6945	11.8339	11.3892
	24.4166	14.8186	12.0491
	15.7201	14.4073	15.782
	15.7201	9.607	6.7724
	10.8185	7.7541	16.9517
	10.8185	5.5803	7.363
	4.715	6.3407	9.3946
	15.7201	17.2893	7.4385
	12.8938	8.0899	16.8471
	10.8185	12.2108	6.5331
	25.1062	4.6923	11.0034
	15.7201	11.7705	7.6027
	21.7713	31.5396	6.1321
	21.7713	47.8323	11.0704
	21.4503	13.4254	20.2809
	22.9766	13.1192	13.4559
	21.4503	27.7311	20.1481
	22.9766	13.4666	11.245
	21.4503	11.2579	5.8134
	22.9766	17.1374	18.3773
	82.969	11.0111	17.6146
	7.081	7.9916	10.2307
	7.081	12.9097	14.9056
	7.081	11.7224	19.2799
	41.6621	37.2063	23.3858
	41.6621	14.0654	13.8994
	29.4075	5.6353	13.8719
	25.6669	30.5426	13.0411
	25.6669	15.2115	18.2869
	25.6669	16.5071	22.0192
	31.1615	24.2315	11.3382
	25.6163	8.0723	15.4147
	31.1615	9.722	11.5021
	12.9507	7.3614	12.2729
	14.0234	10.7138	9.3367
	31.1615	20.1039	10.0351
	25.6163	7.0999	14.7359
	31.1615	11.1356	6.0258
	31.1615	10.9316	9.6019
	12.9507	17.7491	8.7412
	12.9507	15.6422	7.2722
	25.6163	7.8959	20.1807
	25.6163	15.8406	18.5615
	14.3533	6.4221	18.4158
	10.4342	13.9108	10.2811
	16.07	8.8658	6.3206
	15.7536	9.8668	6.5611
	12.8961	6.498	7.7637
	20.2057	8.5618	11.2078
	5.1541	16.0413	15.1822
	20.8842	10.4312	17.2848
	14.617	7.1519	8.8995
	10.4824	6.5222	21.2282
	14.617	9.9205	17.8428
	7.5719	9.7021	10.376
	8.9496	10.1143	6.83
	5.5368	7.5858	11.164
	9.7	15.6641	14.8761
	10.9653	7.1842	7.433
	10.9653	7.2193	9.7242
	10.0107	7.0388	9.1493
	8.9496	12.8487	13.3053
	10.9653	13.1845	12.2841
	10.9653	23.8006	18.2907
	9.4056	16.4448	7.4632
	10.4515	9.3567	6.4848
	10.9653	8.7416	26.3506
	10.4515	17.766	10.7249
	6.1055	9.1355	4.8323
	7.1492	12.3703	10.4347
	8.493	5.7201	18.4492
	9.9277	18.5603	5.5269
	8.493	11.5361	6.9343
	12.1472	19.6736	8.182
	11.1463	16.1861	10.5231
	10.7755	29.8442	6.2262
	11.4804	7.9306	11.3026
	10.4824	19.2865	6.314
	12.3923	8.9301	10.4406
	10.4824	9.2264	8.007
	14.9162	12.8168	15.2301
	22.8446	15.2619	13.1814
	12.3923	15.4302	19.3834
	7.6292	11.0979	15.5682
	10.1458	9.3663	13.0292
	7.8694	6.4573	12.6724
	9.5466	19.7279	21.8744
	13.1653	11.2297	6.9426
	9.5466	10.6978	9.423
	11.4498	13.1584	20.3369
	7.4332	5.7972	9.6793
	9.2482	28.9458	12.0332
	15.677	13.1623	5.953
	11.4498	11.5111	10.6667
	14.9101	8.4961	16.7383
	7.4815	11.0754	20.9146
	33.7441	16.014	14.7625
	14.9154	15.8819	5.7655
	14.9154	16.1589	11.8746
	12.1841	15.5316	11.0897
	12.5197	12.2494	15.4762
	12.5197	14.534	15.2698
	14.9154	13.5948	13.5475
	7.3117	15.3934	17.99
	17.7517	6.1576	17.1759
	12.1841	9.7239	14.5598
	7.3117	7.3035	20.5866
	9.5694	21.0664	10.3161
	7.7456	22.9888	20.0891
	8.8895	10.9413	10.0257
	16.9026	7.1387	18.6449
	18.8626	9.772	7.3802
	18.8626	8.3393	9.95
	18.8626	15.4399	7.879
	12.1841	15.8836	8.5353
	14.9101	9.3611	17.0083
	8.6794	12.6159	16.4898
	10.6207	14.4111	12.292
	5.8487	6.9721	8.2608
	12.1841	13.5685	8.6465
	18.8626	8.8266	15.0762
	8.8895	11.2074	15.2243
	10.6207	14.672	9.26
	14.9101	20.7329	19.2357
	18.8626	12.6815	15.1384
	14.9154	12.1166	23.0686
	14.9154	6.3891	10.2488
	15.2022	6.4385	14.8905
	12.5197	11.5923	8.9915
	14.2165	18.5834	14.3855
	15.2022	9.3456	10.6388
	11.8221	21.901	12.8474
	18.8626	8.7611	8.1361
	15.2022	6.7695	7.5356
	18.8626	18.2942	23.3634
	12.5197	9.924	6.0026
	11.8221	18.7674	7.43
	15.2022	11.3166	16.6777
	11.8221	6.8618	15.6902
	18.8626	6.9988	18.7592
	10.3354	11.2235	19.5862
	18.8626	8.6709	6.2192
	19.1202	5.8812	17.0503
	15.2022	7.6345	16.3972
	7.0915	11.1158	13.2561
	15.2022	11.0416	15.4466
	7.0915	13.8782	21.8014
	20.9359	19.1838	5.3084
	7.0915	10.0804	6.315
	18.8626	6.7884	14.0929
	15.2022	17.4752	13.4587
	15.2022	6.4694	7.0957
	12.0745	24.3372	11.8307
	16.065	8.2148	8.1895
	6.5384	10.2907	9.0909
	8.4843	20.8487	10.7431
	16.48	19.1091	13.2604
	16.33	7.6629	8.4722
	14.4954	17.0833	26.4015
	9.005	6.4633	7.0954
	10.1364	11.4523	24.568
	8.9225	20.5344	13.9313
	9.2072	12.3595	17.0461
	9.005	9.0194	24.3503
	9.005	8.5164	17.1523
	10.2771	13.4006	7.2699
	8.9225	34.0703	28.9292
	9.005	7.0487	12.8045
	12.42	20.4015	15.7505
	8.9225	24.0552	18.1652
	7.2964	7.1057	23.146
	16.9106	9.3262	6.0177
	10.181	14.1962	18.3939
	10.3015	6.482	9.8503
	10.3015	9.8118	6.8516
	16.8733	17.4878	14.0172
	17.717	26.0259	30.4532
	23.6577	6.4855	9.9869
	17.717	17.981	13.2237
	16.8733	19.4495	5.6229
	9.841	20.2936	37.3968
	10.3015	9.8845	6.6426
	9.841	6.4931	12.0486
	16.8733	15.6913	12.3418
	6.6665	18.3363	8.4107
	16.8733	5.8577	16.2391
	11.8507	26.8802	28.9017
	15.5202	16.8248	25.328
	11.8507	4.8042	15.5955
	15.5202	5.8273	24.0764
	8.9486	11.6582	12.2461
	15.4007	10.1923	6.499
	15.5202	15.2382	12.0424
	11.8507	10.9251	10.7664
	11.8507	6.5059	5.2988
	15.4007	14.8749	18.0483
	11.8507	10.8484	26.9943
	8.3785	8.006	6.7427
	11.8507	11.5088	14.4032
	9.5443	5.7245	34.3388
	23.6216	6.2053	18.709
	12.468	8.0983	16.0552
	23.6216	12.1414	10.8222
	9.5443	13.7996	16.4071
	12.4865	11.8439	11.0987
	18.5897	7.5887	10.7733
	18.5007	19.6236	52.2249
	10.4749	22.9228	25.3826
	12.468	21.172	5.807
	23.6216	10.0052	8.1667
	12.468	7.2586	16.6608
	12.468	22.9992	7.9226
	10.5964	11.8965	12.6333
	15.2797	6.3055	14.0966
	12.4865	11.1761	10.1803
	10.5964	10.2865	9.6287
	10.4749	8.7837	20.6117
	18.5897	8.6386	10.805
	10.5964	5.3942	13.1341
	10.4749	6.3553	23.9853
	12.468	12.4252	15.1609
	12.468	34.2928	21.6509
	15.2419	22.1328	16.9232
	15.2797	26.7151	22.6575
	10.5964	16.1673	11.3241
	9.0503	12.3418	15.5077
	10.4749	28.2693	7.8673
	12.468	14.4782	19.9956
	16.9694	8.4094	4.8223
	8.8509	27.5174	10.8281
	8.3596	18.6688	18.6115
	10.5964	28.8197	19.5483
	18.646	31.4242	19.8554
	10.7304	27.9662	5.4995
	12.468	24.8401	8.0196
	18.646	26.3243	9.5993
	12.468	16.7492	19.0347
	9.9439	26.9537	24.2101
	10.1628	30.2818	12.5114
	12.468	27.3406	20.3682
	12.468	17.6084	12.2832
	18.646	49.6929	7.2018
	10.1628	97.302	5.9281
	10.1628	37.9171	7.8028
	18.646	5.7994	12.7823
	18.646	5.3741	5.9737
	18.646	8.0682	20.2901
	18.646	47.1424	10.1124
	12.468	37.1354	21.3141
	5.5347	29.4075	19.2828
	7.1926	20.4589	16.1923
	12.4978	16.1342	25.1517
	12.468	42.8803	14.598
	12.4978	13.9971	22.3343
	9.952	31.8936	12.9223
	13.5528	5.9414	9.6832
	10.8668	14.0234	26.2029
	18.646	35.5652	30.8209
	12.4978	22.0271	31.2242
	18.646	12.3927	12.9301
	14.1014	19.0888	25.5943
	7.249	36.6765	12.3046
	18.646	13.3649	27.181
	13.3228	16.884	19.0941
	9.952	30.0291	30.7901
	12.4978	31.9846	23.6854
	13.3228	15.4075	35.2655
	9.952	7.7573	13.0865
	13.3228	8.4098	17.6253
	7.249	10.9726	16.7486
	13.3651	14.9039	32.5456
	16.8471	15.7536	26.1445
	9.303	11.6655	23.4139
	13.0543	19.3619	29.3397
	12.6618	5.1541	22.0114
	12.6969	17.6978	27.2224
	19.9875	13.7618	25.4459
	7.9033	10.4017	20.7722
	15.2369	25.6	15.0379
	7.9033	6.5902	27.8018
	15.2369	10.4389	29.1978
	15.2369	14.3431	7.4524
	12.6618	5.5368	8.8451
	7.9033	13.3398	14.5171
	18.9042	5.7211	18.5482
	19.9875	9.0113	21.0096
	13.0543	17.3274	31.35
	15.2369	6.6306	9.8924
	15.2369	6.8987	9.8515
	12.6618	12.9865	25.3594
	15.2369	5.4306	21.518
	22.0192	7.7364	30.5906
	12.6618	8.0705	5.8929
	18.9042	15.3147	21.1123
	15.2369	12.8326	5.9
	8.2531	6.1055	14.6971
	15.0787	5.7887	11.9104
	15.0787	8.7879	21.362
	12.8982	17.5977	23.472
	8.9948	5.8149	16.6865
	7.2722	11.1463	13.0219
	10.2386	10.7755	30.2502
	15.2369	4.7035	18.7731
	10.2386	5.7174	12.8202
	10.2386	10.6844	21.0941
	12.8982	11.5011	15.032
	8.8995	15.6731	15.251
	21.2282	12.0126	17.6121
	12.8982	10.2475	6.7583
	10.0606	14.9162	11.6716
	10.0606	25.4416	21.1028
	11.4432	5.1566	12.061
	10.0606	9.0074	9.033
	11.4432	7.6164	7.7912
	10.0606	10.1019	13.0106
	19.4681	10.1458	11.9023
	11.4684	7.8694	31.4203
	13.4516	7.2843	12.8134
	12.9004	8.8325	9.5919
	10.0606	14.4897	16.1582
	12.9004	11.8089	30.0136
	12.9004	9.049	8.5068
	4.8323	7.0672	18.8802
	12.8982	10.1732	20.6169
	12.9004	15.4005	11.2136
	12.9004	25.3868	9.4844
	5.5269	12.8789	14.963
	12.8982	9.8476	16.4872
	8.4376	18.3412	18.7016
	13.8956	11.1854	22.073
	12.9004	12.4669	9.8627
	12.9004	7.4815	18.8181
	12.6273	44.9623	36.6134
	10.4406	15.2056	7.7952
	11.355	18.1613	14.8297
	11.355	21.7803	8.7768
	13.1814	10.6593	12.4687
	6.6277	10.5919	7.2431
	10.992	10.2111	20.1865
	12.6724	7.5495	23.7355
	13.7891	5.9284	9.245
	11.355	22.1176	9.1772
	10.992	4.9433	17.2826
	11.4432	9.2085	11.2394
	20.3369	10.1065	15.3092
	8.8993	26.4335	12.8014
	8.9557	19.378	7.6927
	12.108	17.7411	16.493
	8.8993	7.7456	16.1652
	12.2495	5.9384	14.534
	9.6367	27.3856	15.2547
	21.6683	21.583	10.1717
	14.3715	22.5212	12.2679
	12.108	23.4896	17.4031
	17.557	22.6316	12.3752
	12.2495	27.8161	13.6776
	13.1963	14.7003	22.0428
	12.6249	9.3287	11.3006
	33.6818	8.8547	8.0475
	8.3179	8.6794	24.4796
	13.1963	16.4479	10.7871
	14.3715	14.8151	7.8667
	13.1963	11.2026	15.4817
	12.6249	5.7633	5.7459
	8.6465	5.4855	7.3028
	9.7544	17.322	15.4337
	14.9479	19.5395	8.2859
	9.7544	7.1601	11.9764
	9.6367	14.931	20.7763
	12.6249	13.16	13.628
	17.6441	20.7702	5.7114
	12.8474	13.7441	8.7948
	16.5565	14.734	10.6791
	16.5565	25.2578	9.8107
	16.5565	19.4807	12.4978
	17.5991	11.9945	19.2363
	8.0843	12.2638	7.5606
	8.0843	6.5893	13.8114
	12.4659	17.6423	12.0043
	13.4167	17.9894	13.4674
	14.4073	10.3441	15.4702
	14.5558	14.408	19.1668
	19.256	16.0357	9.3807
	16.5202	15.873	16.8143
	14.5558	15.7188	7.1664
	14.5558	20.4614	7.4422
	5.3084	8.0566	13.3046
	14.0929	19.8562	16.835
	9.6386	14.9216	21.1184
	14.4073	11.7146	15.961
	14.5558	22.3353	15.0671
	16.7897	21.9461	6.2896
	13.1853	9.8081	8.4257
	26.4015	17.1466	13.476
	7.0954	19.1202	4.8988
	27.453	10.3619	6.6925
	13.9313	10.4459	15.4443
	16.7897	15.4787	11.4385
	27.453	5.8024	6.0219
	9.2252	9.9195	6.7236
	12.8045	5.2229	5.9017
	15.7505	20.9359	26.3929
	13.3356	11.2115	16.3624
	23.2082	6.8948	7.2038
	16.7897	21.4985	15.0601
	33.0758	16.1478	38.7212
	16.7897	25.3968	13.1634
	11.494	12.0745	60.1426
	9.2252	16.065	36.7556
	14.5304	5.7621	18.8881
	23.2082	10.9965	6.6038
	9.2252	6.4058	5.9038
	33.0758	16.48	7.4355
	11.494	16.33	27.1183
	33.0758	12.5839	12.894
	10.2456	18.1919	20.7989
	16.7897	9.3915	21.8932
	8.3449	12.724	19.3012
	27.453	13.127	12.1175
	23.2082	4.8399	14.1322
	14.5304	11.4403	8.444
	23.2082	7.0218	10.8802
	23.2082	7.4642	11.3466
	10.7653	10.2771	11.204
	32.5563	7.8037	10.865
	6.499	6.72	5.2767
	14.4837	14.6984	6.644
	14.5304	15.7231	11.0784
	8.696	7.2964	19.9972
	10.7653	19.8306	16.52
	10.7653	6.5493	50.7491
	10.7653	9.172	5.6369
	10.2456	8.7429	16.3197
	14.4837	9.5468	5.4305
	10.7653	18.9513	5.3702
	34.4645	12.0441	7.2485
	17.2613	23.6577	7.2239
	12.868	7.111	5.2489
	8.696	14.4376	12.66
	9.4969	12.7599	16.664
	52.2249	14.6866	10.1493
	9.4969	7.9103	29.7507
	9.4969	20.4845	20.3997
	18.8213	6.6665	12.7503
	14.4692	27.0069	5.7933
	12.868	13.9773	20.6665
	9.4969	22.8335	21.3616
	14.4692	13.2499	24.5946
	9.4969	26.8074	15.2706
	14.4692	18.7487	4.82
	15.6271	11.4396	22.2078
	12.1566	19.5138	13.4632
	11.4696	15.3805	16.4175
	18.8213	10.422	12.396
	20.7076	11.0379	12.6473
	18.9652	5.2165	14.3072
	20.7076	18.0255	10.6149
	16.9232	8.7958	19.2401
	18.8213	11.3638	21.6726
	14.4692	10.7201	10.7737
	11.3241	11.1719	13.2872
	17.4635	7.8589	12.5508
	18.9652	31.3224	6.5964
	10.1694	20.4147	16.2623
	4.8223	24.6522	9.6224
	7.5667	24.7359	15.3345
	24.434	11.2296	12.0306
	13.3107	16.0036	15.7834
	8.7142	19.3997	20.7277
	11.294	18.5007	5.9502
	24.2967	7.297	9.4783
	12.2832	15.7249	10.2398
	10.1694	12.4708	23.778
	18.8213	25.7575	12.5606
	13.3107	13.8722	21.6891
	13.3107	9.3448	21.2454
	18.8213	13.9686	5.7266
	20.6046	16.2818	15.6232
	8.7069	6.838	7.5222
	6.0502	17.6274	12.6236
	18.9652	8.9694	8.9864
	13.7602	10.5861	5.8299
	24.434	6.54	16.1839
	10.2106	13.3431	12.0619
	24.434	19.4203	11.8228
	24.434	20.9214	29.7174
	24.434	12.814	7.018
	20.6046	11.163	14.4325
	10.4028	6.4359	5.9869
	18.9652	18.1977	12.9662
	24.2967	18.0894	9.0607
	18.9652	11.1482	8.323
	18.9652	18.5832	20.6829
	16.4611	15.5768	7.8958
	18.9652	10.4115	7.2955
	16.4611	9.0503	10.2094
	18.9652	5.8662	9.8232
	24.2967	12.3236	5.9519
	18.9652	5.3101	6.1195
	18.9652	18.4993	12.9456
	12.4842	23.8634	27.1689
	18.9652	6.604	25.9305
	14.5171	8.3596	24.3045
	18.9652	13.6642	6.6661
	18.9652	12.9915	14.8955
	12.4842	10.7304	30.1291
	18.9652	5.8822	9.4639
	18.9652	17.2112	19.765
	24.434	7.8983	8.0548
	5.8929	12.3203	11.9379
	18.9652	9.1902	10.395
	26.2653	5.821	6.094
	12.4842	17.5229	7.6551
	10.7645	7.0593	23.5452
	27.679	14.4237	17.8581
	18.9652	23.647	23.0202
	18.9652	25.2964	17.9364
	18.7484	31.8204	14.6842
	18.1769	33.4937	6.7669
	14.5931	10.2875	12.457
	11.2269	5.5347	18.4366
	18.1769	7.9994	5.3759
	28.6241	8.8021	21.3824
	24.2967	5.3812	24.0021
	13.8745	22.1132	10.5559
	26.2653	16.363	17.618
	13.1589	23.2869	15.7981
	9.5919	7.3625	9.7655
	26.2653	13.5528	17.1136
	14.5931	11.5741	5.4241
	13.1589	11.0688	25.5457
	11.5314	24.6563	4.9963
	13.8745	15.4873	22.1175
	15.2616	18.3956	8.1754
	15.2616	14.9968	12.1566
	12.7034	7.1351	21.6028
	28.6241	11.8757	9.5941
	8.829	7.6959	36.0995
	28.6241	12.8908	29.0353
	8.829	11.3892	12.312
	13.8745	12.0491	6.8506
	15.2156	15.782	16.4394
	24.5152	6.7724	15.8718
	7.6504	16.9517	27.0343
	15.2156	7.363	13.6122
	7.5787	9.3946	11.8279
	10.7062	7.4385	10.977
	16.1025	16.8471	13.3574
	25.3804	6.5331	16.4945
	10.8373	11.0034	17.0792
	16.6945	7.6027	6.5141
	6.4066	6.1321	11.9638
	18.0842	11.0704	16.8123
	7.6927	20.2809	13.9501
	6.4066	13.4559	6.0823
	16.5492	14.0655	6.4622
	10.7062	5.8315	6.8218
	16.1025	20.6951	6.5606
	16.1025	7.3243	15.9627
	16.1025	20.1481	13.2295
	11.3939	11.245	9.9687
	10.3981	6.4529	21.9837
	10.3981	5.8134	9.818
	11.3939	18.3773	7.4106
	10.3981	17.6146	13.8573
	14.99	11.0608	19.7333
	13.6686	10.2307	24.9725
	13.8889	14.9056	29.5637
	13.8889	19.2799	42.3711
	10.8373	23.3858	10.091
	13.7273	16.3908	19.653
	11.3939	13.8994	8.3853
	27.679	13.8719	9.9406
	13.8889	13.0411	12.3704
	7.546	18.2869	19.2158
	8.1544	22.0192	8.1905
	10.6791	11.3382	10.1547
	8.1544	15.4147	25.3367
	20.4196	11.5021	18.0625
	20.4196	12.2729	28.1373
	12.7039	9.3367	11.9265
	13.8889	10.0351	29.4308
	12.7039	6.0258	6.978
	11.783	9.6019	7.2932
	17.2627	8.7412	9.8459
	7.546	7.2722	8.8232
	16.8143	13.1604	9.2942
	12.7039	18.4158	25.0154
	7.6078	10.2811	25.372
	13.8889	6.5611	7.5685
	13.8889	7.7637	19.3004
	15.961	11.2078	14.658
	6.7162	17.2848	19.3777
	12.1174	8.8995	9.747
	5.4604	21.2282	5.6517
	6.7162	9.7693	14.3669
	13.8889	17.8428	10.4191
	12.3122	10.376	14.0908
	13.8889	6.83	21.1241
	12.5279	11.164	7.1207
	22.1083	14.8761	12.6396
	12.5279	7.433	16.5215
	7.5897	9.7242	5.2819
	22.1083	19.4681	13.6047
	7.0214	9.1493	5.4505
	35.7349	13.3053	17.0159
	12.07	12.2841	18.3708
	21.06	18.2907	14.4758
	35.7349	7.4632	7.2697
	14.8235	6.4848	26.0707
	16.1143	26.3506	20.3777
	13.0721	10.7249	19.1067
	11.5827	4.8323	18.0822
	11.5827	10.4347	17.599
	21.3569	18.4492	23.1701
	11.5827	14.872	18.2438
	21.3569	5.5269	16.4968
	21.3569	6.9343	7.0982
	11.5827	8.182	15.6662
	11.5827	13.8956	6.2866
	12.07	10.5231	9.9269
	10.5287	6.2262	7.0535
	11.4007	11.3026	8.6807
	9.6084	6.314	6.4488
	15.101	10.4406	11.7036
	8.3555	8.007	7.5273
	8.8663	12.276	6.0331
	10.5287	15.2301	14.4606
	9.6084	13.1814	11.3022
	8.3555	5.9469	13.2648
	10.5287	19.3834	18.2932
	10.5287	15.5682	14.8381
	31.1615	13.0292	13.0655
	8.3555	12.6724	28.0993
	15.4518	21.8744	16.803
	8.3555	15.9922	22.5654
	31.1615	6.9426	12.5831
	8.3706	9.423	16.7353
	9.9915	20.3369	21.2959
	15.4518	9.6793	27.7247
	8.3475	12.0332	7.3223
	31.1615	5.953	19.8207
	16.8928	10.6667	21.65
	10.3786	16.7383	6.3186
	8.3706	20.9146	18.631
	10.3786	8.9029	8.2741
	16.8928	14.7625	12.4994
	11.1363	5.7655	35.4933
	4.82	9.1332	15.3891
	11.1363	11.8746	21.9493
	15.7309	11.0897	21.5204
	11.4299	15.4762	30.76
	11.3052	15.2698	11.1137
	12.6473	17.99	19.771
	40.1036	17.1759	36.6531
	14.3072	14.5598	11.9894
	17.5026	20.5866	21.5685
	13.0665	10.3161	8.1512
	21.6726	20.0891	11.3928
	17.5026	10.0257	17.2229
	13.0665	18.6449	15.5821
	7.6273	7.3802	22.6495
	17.5026	9.95	22.9501
	14.4066	7.879	8.5479
	7.6273	8.5353	22.6951
	14.4066	17.0083	18.3707
	15.9776	16.4898	13.7071
	19.2839	12.292	10.5434
	12.0306	8.2608	18.8566
	15.7834	8.6465	12.5449
	18.0311	15.0762	17.1764
	24.5973	15.2243	13.9299
	9.4783	9.26	4.9436
	12.5025	15.1384	26.9769
	10.2398	23.0686	8.4927
	22.7335	10.2488	11.1852
	22.7335	14.8905	21.0133
	16.6773	8.9915	5.5882
	5.7266	14.3855	6.8653
	16.6773	17.6441	9.2719
	8.7741	12.8474	20.1182
	21.5097	13.7305	14.4294
	25.1662	8.1361	14.5581
	25.1662	23.7595	18.1959
	22.863	7.5356	11.8296
	9.8144	23.3634	12.163
	10.6207	6.0026	18.2016
	9.8144	7.43	8.9974
	16.6773	16.6777	6.5217
	16.6773	15.6902	14.6645
	19.4241	18.7592	10.1445
	9.54	19.5862	19.7436
	11.8228	6.2192	17.7341
	19.4241	12.9068	11.6202
	19.4241	17.0503	11.2325
	16.6808	16.3972	19.2272
	9.54	16.4821	8.9809
	10.5999	13.2561	21.9429
	21.574	15.4466	34.7927
	10.5999	21.8014	30.059
	39.101	5.3084	21.0048
	10.5999	6.315	17.503
	15.5679	14.0929	27.8706
	10.0195	13.4587	17.9765
	17.4938	7.0957	9.1225
	8.4843	11.8307	23.6276
	15.5679	8.1895	32.7886
	8.4843	9.0909	17.3687
	16.7836	10.7431	7.0887
	11.0828	13.2604	17.0247
	11.0828	8.4722	13.5616
	11.0828	26.4015	21.7704
	18.2513	7.0954	11.8883
	18.2513	24.568	7.4887
	11.0828	13.9313	14.2318
	8.4086	17.0461	30.8241
	18.2513	24.3503	9.182
	18.2513	17.1523	30.1646
	18.2513	7.2699	8.4811
	15.0404	26.8575	8.0672
	6.6661	27.3095	28.2082
	11.4419	28.9292	12.5215
	30.1291	10.8369	7.0053
	12.3054	12.8045	15.5954
	12.3054	15.7505	16.7193
	12.3054	12.2121	8.6589
	12.3054	18.1652	13.4653
	6.057	24.9279	12.0348
	10.4551	9.1089	10.2675
	17.2213	23.146	17.2895
	18.7478	6.0177	8.7148
	17.2213	27.799	7.662
	7.804	18.3939	7.6563
	20.4783	9.8503	21.6256
	18.7478	6.8516	14.8316
	20.4783	14.0172	15.4749
	17.671	23.9886	8.9311
	11.049	30.4532	11.6876
	17.2213	9.9869	13.3662
	5.3759	36.8718	13.3689
	18.7478	13.2237	17.323
	15.5947	14.0383	10.253
	14.0138	5.6229	27.816
	14.0138	37.3968	9.3285
	14.0138	6.6426	15.1519
	10.7107	12.0486	7.9781
	23.7745	12.3418	12.928
	23.7745	8.4107	20.9802
	20.4558	16.2391	15.9054
	6.207	28.9017	16.2668
	17.0485	25.328	15.1001
	13.3275	15.5955	24.8612
	30.7028	18.4028	14.0606
	13.3275	24.0764	25.4896
	11.7718	12.2461	15.9258
	8.2224	38.5224	11.0375
	28.9125	6.499	20.3901
	8.2224	12.0424	11.5829
	16.4394	10.7664	11.7119
	11.4823	5.2988	19.5404
	11.4823	18.0483	13.9569
	26.2087	11.6255	7.0091
	15.3836	26.9943	16.9932
	11.8967	6.7427	8.9508
	11.8967	7.1569	20.1515
	11.8967	14.4032	23.7161
	11.4823	34.3388	10.5015
	15.3836	18.709	31.3268
	11.8967	16.0552	16.3078
	10.7516	34.4645	20.8821
	13.4844	10.8222	6.7575
	13.4844	16.4071	20.2768
	13.4844	12.6274	11.964
	11.3921	11.0987	8.3841
	11.7059	10.7733	14.8224
	8.6915	52.2249	5.9104
	8.6915	6.1897	10.6015
	6.5606	15.2612	9.272
	11.7059	25.3826	7.0986
	22.5633	11.9374	12.7212
	16.5864	7.9823	7.4701
	22.5633	5.807	13.5061
	11.7059	8.1667	5.8066
	7.4106	16.6608	6.7121
	13.4844	7.9226	10.8698
	16.5864	12.6333	7.2524
	25.2228	14.0966	11.2363
	29.2892	12.1566	17.5668
	14.6114	10.1803	17.2464
	11.1555	9.6287	20.0891
	11.1555	18.3361	6.3912
	9.7168	20.6117	6.5884
	9.6011	12.9618	7.2829
	9.6011	10.805	7.9165
	9.6011	10.3871	13.3544
	9.7168	13.1341	24.8514
[truncated: 5,693 more rows]
