# Supplementary material for: Fetal liver macrophages contribute to the hematopoietic stem cell niche by controlling granulopoiesis
Source: eLife. 2024 Mar 25;13:e86493. doi: 10.7554/eLife.86493 (PMC11006421; doi:10.7554/eLife.86493)
Supplement: Figure 4—figure supplement 2—source data 1. [file elife-86493-fig4-figsupp2-data1.xlsx]

## Sheet: Figure 4-figure supplement 2
Section 1	cells	Proportion
CD150+ CD41+	6	0.455927
CD150+ CD41-	1310	99.5441
Total	1316
Section 2		Proportion
CD150+ CD41+	29	0.661044
CD150+ CD41-	4358	99.339
Total	4387
Section 3		Proportion
CD150+ CD41+	13	1.87861
CD150+ CD41-	679	98.1214
Total	692
