# Supplementary material for: Fetal liver macrophages contribute to the hematopoietic stem cell niche by controlling granulopoiesis
Source: eLife. 2024 Mar 25;13:e86493. doi: 10.7554/eLife.86493 (PMC11006421; doi:10.7554/eLife.86493)
Supplement: Figure 4—source data 1. [file elife-86493-fig4-data1.xlsx]

## Sheet: Figure 4F
A	B	C	D
0	0	1	0
0	0	0	1
0	0	2	0
0	0	0	0
0	0	2	0
0	0	1	0
0	0	0	0
0	0	1	0
0	0	0	0
0	0	1	1
0	0	0	1
0	0	0	0
0	0	3	1
0	0	0	0
0	0	0	0
0	1	0	0
2	1	0	1
2	0	3	0
0	0	1	0
0	0	5	0
