# Supplementary material for: Fetal liver macrophages contribute to the hematopoietic stem cell niche by controlling granulopoiesis
Source: eLife. 2024 Mar 25;13:e86493. doi: 10.7554/eLife.86493 (PMC11006421; doi:10.7554/eLife.86493)
Supplement: Figure 5—source data 1. [file elife-86493-fig5-data1.xlsx]

## Sheet: Figure 5A
Label	Total_count	Mac_count
Tnfrsf11a+/+; Spi1f/f	4348500	24753
Tnfrsf11a+/+; Spi1f/f	4080000	31203
Tnfrsf11a+/+; Spi1f/f	3690000	22605
Tnfrsf11a+/+; Spi1f/f	5044500	22362
Tnfrsf11a+/+; Spi1f/f	6430500	40143
Tnfrsf11a+/+; Spi1f/f	5992500	38616
Tnfrsf11a+/+; Spi1f/f	4677000	28965
Tnfrsf11a+/+; Spi1f/f	5910000	31908
Tnfrsf11a+/+; Spi1f/f	2559000	19947
Tnfrsf11a+/+; Spi1f/f	4386000	13398
Tnfrsf11a+/+; Spi1f/f	3585000	9090
Tnfrsf11aCre/+; Spi1f/f	2481000	2961
Tnfrsf11aCre/+; Spi1f/f	4101000	3417
Tnfrsf11aCre/+; Spi1f/f	4302000	1839
Tnfrsf11aCre/+; Spi1f/f	3196500	525
Tnfrsf11aCre/+; Spi1f/f	4359000	1071

## Sheet: Figure 5C
Label	Total_count	CD45_count
Tnfrsf11a+/+; Spi1f/f	3585000	160653
Tnfrsf11a+/+; Spi1f/f	5044500	174933
Tnfrsf11a+/+; Spi1f/f	2673430	175890
Tnfrsf11a+/+; Spi1f/f	4348500	177693
Tnfrsf11a+/+; Spi1f/f	2559000	180930
Tnfrsf11a+/+; Spi1f/f	2144380	187890
Tnfrsf11a+/+; Spi1f/f	3690000	189399
Tnfrsf11a+/+; Spi1f/f	4677000	210249
Tnfrsf11a+/+; Spi1f/f	4880000	218400
Tnfrsf11a+/+; Spi1f/f	4386000	220887
Tnfrsf11a+/+; Spi1f/f	3427090	221870
Tnfrsf11a+/+; Spi1f/f	4080000	227661
Tnfrsf11a+/+; Spi1f/f	5910000	258402
Tnfrsf11a+/+; Spi1f/f	6430500	326442
Tnfrsf11a+/+; Spi1f/f	5992500	338604
Tnfrsf11a+/+; Spi1f/f	4960000	439760
Tnfrsf11aCre/+; Spi1f/f	3196500	108921
Tnfrsf11aCre/+; Spi1f/f	2492440	154700
Tnfrsf11aCre/+; Spi1f/f	2481000	194694
Tnfrsf11aCre/+; Spi1f/f	3671070	224140
Tnfrsf11aCre/+; Spi1f/f	4101000	240210
Tnfrsf11aCre/+; Spi1f/f	4359000	284262
Tnfrsf11aCre/+; Spi1f/f	4302000	284439
Tnfrsf11aCre/+; Spi1f/f	4040000	350800
Tnfrsf11aCre/+; Spi1f/f	6600000	377580
Tnfrsf11aCre/+; Spi1f/f	6100000	498890

## Sheet: Figure 5E
Label	p_erytrocytes
Tnfrsf11a+/+; Spi1f/f	78.5969
Tnfrsf11a+/+; Spi1f/f	88.4956
Tnfrsf11a+/+; Spi1f/f	83.0816
Tnfrsf11a+/+; Spi1f/f	53.7037
Tnfrsf11a+/+; Spi1f/f	66.899
Tnfrsf11a+/+; Spi1f/f	64.8649
Tnfrsf11a+/+; Spi1f/f	78.4729
Tnfrsf11a+/+; Spi1f/f	68.9162
Tnfrsf11a+/+; Spi1f/f	60.5459
Tnfrsf11a+/+; Spi1f/f	84.6608
Tnfrsf11a+/+; Spi1f/f	52.7083
Tnfrsf11a+/+; Spi1f/f	61.3569
Tnfrsf11a+/+; Spi1f/f	68.9162
Tnfrsf11aCre/+; Spi1f/f	60.4246
Tnfrsf11aCre/+; Spi1f/f	48.2
Tnfrsf11aCre/+; Spi1f/f	49.9454
Tnfrsf11aCre/+; Spi1f/f	48.8181
Tnfrsf11aCre/+; Spi1f/f	42.0664
Tnfrsf11aCre/+; Spi1f/f	58.7669
Tnfrsf11aCre/+; Spi1f/f	78.4017
Tnfrsf11aCre/+; Spi1f/f	62.6898
Tnfrsf11aCre/+; Spi1f/f	44.4183

## Sheet: Figure 5F
Label	S0	S1	S2	S3	S4	S5
Tnfrsf11a+/+; Spi1f/f	0.34	7.07	18.7	44	17.9	10.8
Tnfrsf11a+/+; Spi1f/f	0.42	9.28	18.4	42.2	19.4	9.02
Tnfrsf11a+/+; Spi1f/f	0.42	12.3	11.7	56.6	13.7	4.66
Tnfrsf11a+/+; Spi1f/f	0.39	8.59	10.1	65	12.1	3.34
Tnfrsf11a+/+; Spi1f/f	0.25	8.77	16	49.7	16	8.33
Tnfrsf11a+/+; Spi1f/f	0.35	8.71	11.2	39.9	28.4	10.5
Tnfrsf11a+/+; Spi1f/f	0.25	10.1	13.2	48	18.4	9.32
Tnfrsf11a+/+; Spi1f/f	0.45	10.7	13.6	39.3	26.5	7.92
Tnfrsf11a+/+; Spi1f/f	0.39	10.8	13	42.5	25.1	7.23
Tnfrsf11a+/+; Spi1f/f	0.84	8.64	2.46	71.7	14.1	0.95
Tnfrsf11a+/+; Spi1f/f	0.39	7.87	2.38	76.5	10.8	0.75
Tnfrsf11aCre/+; Spi1f/f	0.18	3.41	17	47.4	19.7	11.5
Tnfrsf11aCre/+; Spi1f/f	0.49	13.5	11.8	51	16.2	6.3
Tnfrsf11aCre/+; Spi1f/f	0.92	14.9	12.5	47.2	16.4	6.8
Tnfrsf11aCre/+; Spi1f/f	0.72	7.77	9.57	58	16.6	6.45
Tnfrsf11aCre/+; Spi1f/f	1.26	8.6	2.78	72	13.3	1.04
