# Supplementary material for: Fetal liver macrophages contribute to the hematopoietic stem cell niche by controlling granulopoiesis
Source: eLife. 2024 Mar 25;13:e86493. doi: 10.7554/eLife.86493 (PMC11006421; doi:10.7554/eLife.86493)
Supplement: Figure 6—source data 1. [file elife-86493-fig6-data1.xlsx]

## Sheet: Figure 6C
Label	HSC.LTcount	HSC.STcount	MPP2count	MPP3count	MPP4count
Tnfrsf11a+/+; Spi1f/f	450	8073	2169	7431	2295
Tnfrsf11a+/+; Spi1f/f	330	3456	1446	3861	1917
Tnfrsf11a+/+; Spi1f/f	951	6303	4146	10098	2346
Tnfrsf11a+/+; Spi1f/f	810	9117	3738	11601	2412
Tnfrsf11a+/+; Spi1f/f	636	4674	2787	6627	2307
Tnfrsf11a+/+; Spi1f/f	675	2952	2319	4674	1014
Tnfrsf11aCre/+; Spi1f/f	447	4506	2256	6330	2883
Tnfrsf11aCre/+; Spi1f/f	510	6561	2157	7287	2241
Tnfrsf11aCre/+; Spi1f/f	951	6108	3939	10194	2190
Tnfrsf11aCre/+; Spi1f/f	696	3021	2262	4752	996
Tnfrsf11aCre/+; Spi1f/f	534	2334	1092	2892	3783

## Sheet: Figure 6D
Label	CLPcount	CMPcount	GMPcount	MEPcount
Tnfrsf11a+/+; Spi1f/f	1572	158145	34317	294456
Tnfrsf11a+/+; Spi1f/f	726	87813	26124	253926
Tnfrsf11a+/+; Spi1f/f	1257	393018	70569	331086
Tnfrsf11a+/+; Spi1f/f	1668	311322	54471	286092
Tnfrsf11a+/+; Spi1f/f	2418	222525	33369	215355
Tnfrsf11a+/+; Spi1f/f	999	262572	45987	265944
Tnfrsf11a+/+; Spi1f/f		35620	24770	237810
Tnfrsf11a+/+; Spi1f/f		84190	58350	488500
Tnfrsf11a+/+; Spi1f/f		37650	26930	236390
Tnfrsf11a+/+; Spi1f/f		52370	31010	375470
Tnfrsf11a+/+; Spi1f/f		52230	36000	525730
Tnfrsf11aCre/+; Spi1f/f	1779	112440	59682	349293
Tnfrsf11aCre/+; Spi1f/f	1452	111009	48876	354282
Tnfrsf11aCre/+; Spi1f/f	1617	376410	74058	324576
Tnfrsf11aCre/+; Spi1f/f	615	249525	43902	246495
Tnfrsf11aCre/+; Spi1f/f	726	235251	46956	249090
Tnfrsf11aCre/+; Spi1f/f		80360	54200	618690
Tnfrsf11aCre/+; Spi1f/f		72870	44160	592690
Tnfrsf11aCre/+; Spi1f/f		43600	27540	350600
Tnfrsf11aCre/+; Spi1f/f		58850	59930	421710
Tnfrsf11aCre/+; Spi1f/f		39050	20390	255640

## Sheet: Figure 6E
Label	Total	Divided	% Divided
Tnfrsf11aCre/+; Spi1f/f	11	8	0.727273
Tnfrsf11aCre/+; Spi1f/f	14	9	0.642857
Tnfrsf11aCre/+; Spi1f/f	26	10	0.384615
Tnfrsf11aCre/+; Spi1f/f	25	11	0.44
Tnfrsf11aCre/+; Spi1f/f	20	9	0.45
Tnfrsf11a+/+; Spi1f/f	12	8	0.666667
Tnfrsf11a+/+; Spi1f/f	12	8	0.666667
Tnfrsf11a+/+; Spi1f/f	10	5	0.5
Tnfrsf11a+/+; Spi1f/f	15	8	0.533333
Tnfrsf11a+/+; Spi1f/f	28	20	0.714286

## Sheet: Figure 6F
Label	Replicate	Counts
Tnfrsf11a+/+; Spi1f/f	2nd	78
Tnfrsf11a+/+; Spi1f/f	1st	34
Tnfrsf11a+/+; Spi1f/f	2nd	143
Tnfrsf11a+/+; Spi1f/f	1st	25
Tnfrsf11a+/+; Spi1f/f	2nd	182
Tnfrsf11a+/+; Spi1f/f	1st	61
Tnfrsf11a+/+; Spi1f/f	2nd	127
Tnfrsf11a+/+; Spi1f/f	1st	21
Tnfrsf11a+/+; Spi1f/f	2nd	132
Tnfrsf11a+/+; Spi1f/f	1st	21
Tnfrsf11a+/+; Spi1f/f	2nd	100
Tnfrsf11a+/+; Spi1f/f	1st	32
Tnfrsf11a+/+; Spi1f/f	1st	105
Tnfrsf11a+/+; Spi1f/f	2nd	156
Tnfrsf11aCre/+; Spi1f/f	2nd	152
Tnfrsf11aCre/+; Spi1f/f	1st	28
Tnfrsf11aCre/+; Spi1f/f	2nd	152
Tnfrsf11aCre/+; Spi1f/f	1st	48
Tnfrsf11aCre/+; Spi1f/f	2nd	133
Tnfrsf11aCre/+; Spi1f/f	1st	53
Tnfrsf11aCre/+; Spi1f/f	2nd	98
Tnfrsf11aCre/+; Spi1f/f	1st	31
Tnfrsf11aCre/+; Spi1f/f	1st	53
Tnfrsf11aCre/+; Spi1f/f	1st	64
Tnfrsf11aCre/+; Spi1f/f	1st	75
Tnfrsf11aCre/+; Spi1f/f	1st	60
Tnfrsf11aCre/+; Spi1f/f	2nd	62
Tnfrsf11aCre/+; Spi1f/f	2nd	83
Tnfrsf11aCre/+; Spi1f/f	2nd	126
Tnfrsf11aCre/+; Spi1f/f	2nd	215
