# Supplementary material for: Fetal liver macrophages contribute to the hematopoietic stem cell niche by controlling granulopoiesis
Source: eLife. 2024 Mar 25;13:e86493. doi: 10.7554/eLife.86493 (PMC11006421; doi:10.7554/eLife.86493)
Supplement: Figure 7—source data 1. [file elife-86493-fig7-data1.xlsx]

## Sheet: Figure 7A
genotype	Macrophages_count	Granulocytes_count	Monocytes_count	Macrophages_percent	Granulocytes_percent	Monocytes_percent
Tnfrsf11a+/+; Spi1f/f	24753	2637	12252	62.4414	6.65204	30.9066
Tnfrsf11a+/+; Spi1f/f	31203	5121	18078	57.3563	9.41326	33.2304
Tnfrsf11a+/+; Spi1f/f	22605	2796	15186	55.6952	6.88891	37.4159
Tnfrsf11a+/+; Spi1f/f	22362	2862	14748	55.9442	7.16001	36.8958
Tnfrsf11a+/+; Spi1f/f	40143	1380	30462	55.7658	1.91707	42.3171
Tnfrsf11a+/+; Spi1f/f	38616	2706	39363	47.8602	3.35378	48.786
Tnfrsf11a+/+; Spi1f/f	28965	1119	24651	52.9186	2.0444	45.037
Tnfrsf11a+/+; Spi1f/f	31908	1239	21171	58.743	2.28101	38.976
Tnfrsf11a+/+; Spi1f/f	19947	1062	11583	61.2021	3.25847	35.5394
Tnfrsf11a+/+; Spi1f/f	13398	4833	11133	45.6273	16.4589	37.9138
Tnfrsf11a+/+; Spi1f/f	9090	3549	8412	43.1808	16.8591	39.9601
Tnfrsf11aCre/+; Spi1f/f	2961	5526	16575	11.8147	22.0493	66.136
Tnfrsf11aCre/+; Spi1f/f	3417	7359	29286	8.52928	18.369	73.1017
Tnfrsf11aCre/+; Spi1f/f	1839	6738	27822	5.05234	18.5115	76.4362
Tnfrsf11aCre/+; Spi1f/f	525	4341	7035	4.41139	36.4759	59.1127
Tnfrsf11aCre/+; Spi1f/f	1071	7056	23556	3.38036	22.2706	74.349

## Sheet: Figure 7C
genotype	A	B	C
Tnfrsf11a+/+; Spi1f/f	746	784	4759
Tnfrsf11a+/+; Spi1f/f	479	1505	3912
Tnfrsf11a+/+; Spi1f/f	1363	504	4967
Tnfrsf11a+/+; Spi1f/f	1465	763	7245
Tnfrsf11a+/+; Spi1f/f	1181	4908	6099
Tnfrsf11a+/+; Spi1f/f	1053	3871	6607
Tnfrsf11a+/+; Spi1f/f	699	3034	4054
Tnfrsf11a+/+; Spi1f/f	754	3503	4663
Tnfrsf11a+/+; Spi1f/f	386	2447	2509
Tnfrsf11aCre/+; Spi1f/f	288	130	982
Tnfrsf11aCre/+; Spi1f/f	132	93	545
Tnfrsf11aCre/+; Spi1f/f	52	14	126
Tnfrsf11aCre/+; Spi1f/f	387	66	1173

## Sheet: Figure 7D
Label	Neutrophils	Cx3cr1+ Monocytes	Cx3cr1- Monocytes
Tnfrsf11a+/+; Spi1f/f	2637	2232	10020
Tnfrsf11a+/+; Spi1f/f	5121	3210	14868
Tnfrsf11a+/+; Spi1f/f	2796	4812	10374
Tnfrsf11a+/+; Spi1f/f	2862	6060	8688
Tnfrsf11a+/+; Spi1f/f	1380	5910	24552
Tnfrsf11a+/+; Spi1f/f	2706	8532	30831
Tnfrsf11a+/+; Spi1f/f	1119	3471	21180
Tnfrsf11a+/+; Spi1f/f	1239	3999	17172
Tnfrsf11a+/+; Spi1f/f	1062	2193	9390
Tnfrsf11a+/+; Spi1f/f	4833	6948	4185
Tnfrsf11a+/+; Spi1f/f	3549	6462	1950
Tnfrsf11aCre/+; Spi1f/f	5526	2001	14574
Tnfrsf11aCre/+; Spi1f/f	7359	7272	22014
Tnfrsf11aCre/+; Spi1f/f	6738	7452	20370
Tnfrsf11aCre/+; Spi1f/f	4341	2097	4938
Tnfrsf11aCre/+; Spi1f/f	7056	14664	8892

## Sheet: Figure 7E
genotype	F480_count	Neutrophils_count
Tnfrsf11a+/+; Spi1f/f	22086	53100
Tnfrsf11a+/+; Spi1f/f	21690	54552
Tnfrsf11a+/+; Spi1f/f	14790	35346
Tnfrsf11a+/+; Spi1f/f	32508	53022
Tnfrsf11a+/+; Spi1f/f	34470	68418
Tnfrsf11a+/+; Spi1f/f	41022	76068
Tnfrsf11a+/+; Spi1f/f	54090	106806
Tnfrsf11a+/+; Spi1f/f	15966	92658
Tnfrsf11a+/+; Spi1f/f	15876	95796
Tnfrsf11a+/+; Spi1f/f	13074	75876
Tnfrsf11a+/+; Spi1f/f	16428	112494
Tnfrsf11aCre/+; Spi1f/f	19668	28770
Tnfrsf11aCre/+; Spi1f/f	38706	137076
Tnfrsf11aCre/+; Spi1f/f	58686	276360
Tnfrsf11aCre/+; Spi1f/f	32040	205368
Tnfrsf11aCre/+; Spi1f/f	40902	213264

## Sheet: Figure 7F
genotype	F480_count	Neutrophils_count
Tnfrsf11aCre/+; Spi1f/f	16494	343266
Tnfrsf11aCre/+; Spi1f/f	26220	241236
Tnfrsf11aCre/+; Spi1f/f	22332	447534
Tnfrsf11aCre/+; Spi1f/f	19284	491898
Tnfrsf11aCre/+; Spi1f/f	72114	687462
Tnfrsf11aCre/+; Spi1f/f	17682	531042
Tnfrsf11aCre/+; Spi1f/f	36348	436908
Tnfrsf11aCre/+; Spi1f/f	43200	532824
Tnfrsf11a+/+; Spi1f/f	9792	252876
Tnfrsf11a+/+; Spi1f/f	11238	219084
Tnfrsf11a+/+; Spi1f/f	12000	328254
Tnfrsf11a+/+; Spi1f/f	21510	196686
Tnfrsf11a+/+; Spi1f/f	17916	234066
Tnfrsf11a+/+; Spi1f/f	16242	190302
Tnfrsf11a+/+; Spi1f/f	15282	279240
Tnfrsf11a+/+; Spi1f/f	15924	194760
Tnfrsf11a+/+; Spi1f/f	10398	254208
Tnfrsf11a+/+; Spi1f/f	58410	376398
Tnfrsf11a+/+; Spi1f/f	33624	244644
Tnfrsf11a+/+; Spi1f/f	74430	589368
Tnfrsf11a+/+; Spi1f/f	75810	374736

## Sheet: Figure 7G
	Tnfrsf11a+/+; Spi1f/f	Tnfrsf11aCre/+; Spi1f/f
GM	0	5
	1	2
	0	2
	0	1
	0	2
GEMM	30	20
	17	30
	16	19
	6	12
	18	12
M	8	14
	6	6
	8	8
	7	7
	4	12
G	0	0
	0	2
	0	1
	0	0
	0	1
CFU-E	20	18
	17	13
	19	23
	15	13
	26	37
BFU-E	5	6
	10	12
	19	15
	8	2
	22	13

## Sheet: Figure 7I
genotype	chimerism	Neutrophils	Ly6Chigh Monocytes
Tnfrsf11a+/+; Spi1f/f	97.5	5.94	2.12
Tnfrsf11a+/+; Spi1f/f	94.1	6.42	2.47
Tnfrsf11a+/+; Spi1f/f	96.2	3.7	2.06
Tnfrsf11a+/+; Spi1f/f	97.4	4.96	1.48
Tnfrsf11a+/+; Spi1f/f	99	6.77	2.76
Tnfrsf11a+/+; Spi1f/f	97.7	4.27	1.93
Tnfrsf11aCre/+; Spi1f/f	97.4	6.98	3.76
Tnfrsf11aCre/+; Spi1f/f	97.5	6.86	4.29
Tnfrsf11aCre/+; Spi1f/f	93.2	8.68	4.25
Tnfrsf11aCre/+; Spi1f/f	97.4	6.74	3.82
Tnfrsf11aCre/+; Spi1f/f	95.8	6	6.12
Tnfrsf11aCre/+; Spi1f/f	98.4	6.93	3.55
