# Supplementary material for: Fetal liver macrophages contribute to the hematopoietic stem cell niche by controlling granulopoiesis
Source: eLife. 2024 Mar 25;13:e86493. doi: 10.7554/eLife.86493 (PMC11006421; doi:10.7554/eLife.86493)
Supplement: Supplementary file 1. [file elife-86493-supp1.xlsx]

## Sheet: Sheet 1 - Table S1
Table S1
Cluster	ID	Description	GeneRatio	BgRatio	pvalue	p.adjust	qvalue	geneID	Count
C1	GO:0006412	translation	17/98	627/23328	9.74e-10	8.66e-07	7.43e-07	Rps2/Ncl/Npm1/Pa2g4/Eif5a/Eif4g2/Eif1a/Rps5/Rpl24/Uqcc2/Rps8/Rps18/Tardbp/Eef1g/Rpl21/Rmnd1/Rc3h1	17
C1	GO:0043043	peptide biosynthetic process	17/98	649/23328	1.64e-09	8.66e-07	7.43e-07	Rps2/Ncl/Npm1/Pa2g4/Eif5a/Eif4g2/Eif1a/Rps5/Rpl24/Uqcc2/Rps8/Rps18/Tardbp/Eef1g/Rpl21/Rmnd1/Rc3h1	17
C1	GO:0043604	amide biosynthetic process	18/98	761/23328	2.56e-09	9.02e-07	7.74e-07	Rps2/Ncl/Npm1/Pa2g4/Eif5a/Eif4g2/Eif1a/Rps5/Rpl24/Uqcc2/Rps8/Rps18/Tardbp/Eef1g/Rpl21/Acss1/Rmnd1/Rc3h1	18
C1	GO:0006518	peptide metabolic process	17/98	795/23328	3.29e-08	8.68e-06	7.45e-06	Rps2/Ncl/Npm1/Pa2g4/Eif5a/Eif4g2/Eif1a/Rps5/Rpl24/Uqcc2/Rps8/Rps18/Tardbp/Eef1g/Rpl21/Rmnd1/Rc3h1	17
C1	GO:0022613	ribonucleoprotein complex biogenesis	11/98	409/23328	1.2e-06	0.000254156	0.000218177	Hsp90ab1/Rps2/Ncl/Dkc1/Npm1/Rbmxl1/Pa2g4/Rps5/Rpl24/Rps8/Wdr12	11
C1	GO:0042254	ribosome biogenesis	9/98	296/23328	4.43e-06	0.000779657	0.000669287	Rps2/Ncl/Dkc1/Npm1/Pa2g4/Rps5/Rpl24/Rps8/Wdr12	9
C1	GO:0010608	posttranscriptional regulation of gene expression	11/98	535/23328	1.54e-05	0.00232991	0.00200008	Ncl/Dkc1/Npm1/Pa2g4/Eif5a/Eif4g2/Ppp3ca/Uqcc2/Tardbp/Rmnd1/Rc3h1	11
C1	GO:0006417	regulation of translation	9/98	355/23328	1.89e-05	0.00250124	0.00214715	Ncl/Npm1/Pa2g4/Eif5a/Eif4g2/Uqcc2/Tardbp/Rmnd1/Rc3h1	9
C1	GO:0006913	nucleocytoplasmic transport	8/98	308/23328	4.74e-05	0.00501038	0.00430109	Hsp90ab1/Npm1/Eif5a/Ppp3ca/Rab18/Ubr5/Tardbp/Ywhae	8
C1	GO:0051169	nuclear transport	8/98	308/23328	4.74e-05	0.00501038	0.00430109	Hsp90ab1/Npm1/Eif5a/Ppp3ca/Rab18/Ubr5/Tardbp/Ywhae	8
C1	GO:0034248	regulation of cellular amide metabolic process	9/98	410/23328	5.81e-05	0.0055805	0.00479051	Ncl/Npm1/Pa2g4/Eif5a/Eif4g2/Uqcc2/Tardbp/Rmnd1/Rc3h1	9
C1	GO:0051347	positive regulation of transferase activity	10/98	591/23328	0.000191459	0.0160152	0.013748	Ccnd1/Hsp90ab1/Rps2/Dkc1/Hmgn1/Npm1/Ltf/Flt3/Dgkz/Ccnd2	10
C1	GO:0045727	positive regulation of translation	5/98	128/23328	0.000207647	0.0160152	0.013748	Npm1/Eif5a/Eif4g2/Uqcc2/Rmnd1	5
C1	GO:0006364	rRNA processing	6/98	206/23328	0.000236307	0.0160152	0.013748	Ncl/Dkc1/Npm1/Pa2g4/Rps8/Wdr12	6
C1	GO:0034504	protein localization to nucleus	7/98	293/23328	0.000239522	0.0160152	0.013748	Hsp90ab1/Npm1/Ppp3ca/Ubr5/Tardbp/Tmem201/Ywhae	7
C1	GO:0006396	RNA processing	12/98	854/23328	0.000242424	0.0160152	0.013748	Ncl/Dkc1/Npm1/Rbmxl1/Pa2g4/Ppp3ca/Pspc1/Rps8/Tardbp/Ctr9/Ints10/Wdr12	12
C1	GO:0016072	rRNA metabolic process	6/98	215/23328	0.000297248	0.0184818	0.0158655	Ncl/Dkc1/Npm1/Pa2g4/Rps8/Wdr12	6
C1	GO:0044770	cell cycle phase transition	8/98	415/23328	0.000365587	0.0214681	0.018429	Ccnd1/Npm1/Ppp3ca/Calm1/Rpl24/Dgkz/Ttk/Ccnd2	8
C1	GO:0006886	intracellular protein transport	12/98	932/23328	0.000532067	0.0278048	0.0238687	Hsp90ab1/Npm1/Eif5a/Ppp3ca/Rab18/Ubr5/Hspa4/Ywhab/Tardbp/Ywhae/Stx2/Ap1g2	12
C1	GO:0034250	positive regulation of cellular amide metabolic process	5/98	158/23328	0.000547219	0.0278048	0.0238687	Npm1/Eif5a/Eif4g2/Uqcc2/Rmnd1	5
C1	GO:0034660	ncRNA metabolic process	8/98	444/23328	0.000570868	0.0278048	0.0238687	Ncl/Dkc1/Npm1/Pa2g4/Rps8/Ints10/Wdr12/Rc3h1	8
C1	GO:1903047	mitotic cell cycle process	10/98	680/23328	0.000578719	0.0278048	0.0238687	Ccnd1/Ppp3ca/Calm1/Mcm2/Rpl24/Dgkz/Ttk/Reep3/Stx2/Ccnd2	10
C1	GO:0034622	cellular protein-containing complex assembly	12/98	951/23328	0.000635722	0.0292156	0.0250797	Hsp90ab1/Rps2/Npm1/Rbmxl1/Set/Gtf2f2/Brd2/Rps5/Mcm2/Rpl24/Uqcc2/Hspa4	12
C1	GO:0051170	import into nucleus	5/98	169/23328	0.000741985	0.0303171	0.0260253	Hsp90ab1/Ppp3ca/Rab18/Ubr5/Tardbp	5
C1	GO:0051726	regulation of cell cycle	12/98	969/23328	0.000749124	0.0303171	0.0260253	Ccnd1/Hsp90ab1/Npm1/Dach1/Fen1/Rpl24/Tardbp/Dgkz/Ttk/Rps15a/Ccnd2/Wdr12	12
C1	GO:0034470	ncRNA processing	7/98	355/23328	0.000753299	0.0303171	0.0260253	Ncl/Dkc1/Npm1/Pa2g4/Rps8/Ints10/Wdr12	7
C1	GO:0065004	protein-DNA complex assembly	5/98	171/23328	0.000782327	0.0303171	0.0260253	Npm1/Set/Gtf2f2/Brd2/Mcm2	5
C1	GO:0022618	ribonucleoprotein complex assembly	5/98	172/23328	0.000803101	0.0303171	0.0260253	Hsp90ab1/Rps2/Rbmxl1/Rps5/Rpl24	5
C1	GO:1903311	regulation of mRNA metabolic process	6/98	266/23328	0.000910681	0.0331928	0.0284939	Ncl/Npm1/Rbmxl1/Tardbp/Ctr9/Rc3h1	6
C1	GO:0071826	ribonucleoprotein complex subunit organization	5/98	179/23328	0.000960267	0.0332932	0.0285801	Hsp90ab1/Rps2/Rbmxl1/Rps5/Rpl24	5
C1	GO:0006413	translational initiation	4/98	104/23328	0.000976431	0.0332932	0.0285801	Rps2/Npm1/Eif4g2/Eif1a	4
C1	GO:0044772	mitotic cell cycle phase transition	7/98	376/23328	0.00105248	0.0347648	0.0298434	Ccnd1/Ppp3ca/Calm1/Rpl24/Dgkz/Ttk/Ccnd2	7
C1	GO:0006974	cellular response to DNA damage stimulus	10/98	750/23328	0.00121892	0.0390423	0.0335153	Ccnd1/Hmgn1/Npm1/Inip/Fen1/Chchd6/Ubr5/Mcm2/Dgkz/Zbtb40	10
C1	GO:0043487	regulation of RNA stability	4/98	116/23328	0.00146334	0.0454927	0.0390527	Dkc1/Npm1/Tardbp/Rc3h1	4
C1	GO:0006325	chromatin organization	10/98	774/23328	0.0015406	0.0465262	0.0399398	Hmgn1/Npm1/Set/Bmi1/Brd2/Ubr5/N6amt1/Mcm2/Chd6/Ctr9	10
C1	GO:2000278	regulation of DNA biosynthetic process	4/98	119/23328	0.00160739	0.0471949	0.0405139	Hsp90ab1/Dkc1/Npm1/Dach1	4
C2	GO:0006954	inflammatory response	22/98	729/23328	2.69e-13	3.45e-10	2.14e-10	Thbs1/Nfkbiz/Il1b/Ccr2/Cxcl2/Cybb/Hp/Clec7a/Fn1/Ctsc/C3/Zfp36/Nfkbia/Itgam/Ccl3/Alox5ap/Hmgb2/Mmp8/Jun/Lilrb4a/Cers6/Il17ra	22
C2	GO:0060326	cell chemotaxis	15/98	303/23328	2.48e-12	1.59e-09	9.88e-10	Thbs1/Il1b/Ccr2/Cxcl2/Lyst/Coro1a/Lgals3/Nr4a1/Dusp1/Itgam/Ccl3/Hmgb2/Mtus1/Il17ra/Met	15
C2	GO:0030334	regulation of cell migration	23/98	936/23328	4.86e-12	2.08e-09	1.29e-09	Thbs1/Vim/Il1b/Ccr2/Sorl1/Clec7a/Fn1/Coro1a/Lgals3/Tmsb10/Egr1/Dusp1/Arhgdib/Ptprc/Jun/Iqgap1/Mtus1/Slk/Myo1f/Klf4/Prkx/Actg1/Met	23
C2	GO:2000145	regulation of cell motility	23/98	986/23328	1.39e-11	3.84e-09	2.39e-09	Thbs1/Vim/Il1b/Ccr2/Sorl1/Clec7a/Fn1/Coro1a/Lgals3/Tmsb10/Egr1/Dusp1/Arhgdib/Ptprc/Jun/Iqgap1/Mtus1/Slk/Myo1f/Klf4/Prkx/Actg1/Met	23
C2	GO:0010942	positive regulation of cell death	20/98	715/23328	1.5e-11	3.84e-09	2.39e-09	Thbs1/Fos/Il1b/Atf3/Hp/Ctsc/Nr4a1/Egr1/Dusp1/Mcl1/Itgam/Ccl3/Ptprc/Jun/Hcar2/Slk/Top2a/Xdh/Capn2/Stk17b	20
C2	GO:0032101	regulation of response to external stimulus	22/98	919/23328	2.55e-11	5.44e-09	3.38e-09	Thbs1/Nfkbiz/Il1b/Ccr2/Clec7a/Fn1/Ctsc/C3/Zfp36/Nfkbia/Anxa2/Dusp1/Ccl3/Alox5ap/Hmgb2/Mmp8/Mtus1/Samhd1/Myo1f/Klf4/Il17ra/Met	22
C2	GO:0050729	positive regulation of inflammatory response	11/98	152/23328	4.3e-11	7.88e-09	4.89e-09	Nfkbiz/Il1b/Ccr2/Clec7a/Ctsc/C3/Nfkbia/Ccl3/Alox5ap/Mmp8/Il17ra	11
C2	GO:0006935	chemotaxis	18/98	612/23328	7.91e-11	1.27e-08	7.88e-09	Thbs1/Il1b/Ccr2/Cxcl2/Emb/Lyst/Fn1/Coro1a/Lgals3/Lsp1/Nr4a1/Dusp1/Itgam/Ccl3/Hmgb2/Mtus1/Il17ra/Met	18
C2	GO:0042330	taxis	18/98	617/23328	9.03e-11	1.29e-08	7.99e-09	Thbs1/Il1b/Ccr2/Cxcl2/Emb/Lyst/Fn1/Coro1a/Lgals3/Lsp1/Nr4a1/Dusp1/Itgam/Ccl3/Hmgb2/Mtus1/Il17ra/Met	18
C2	GO:0001817	regulation of cytokine production	19/98	707/23328	1.02e-10	1.31e-08	8.15e-09	Thbs1/Il1b/Ccr2/Sorl1/Clec7a/C3/Zfp36/Egr1/Ccl3/Hmgb2/Ptprc/Mmp8/Iqgap1/Clec4e/Klf4/Srgn/Capn2/Il17ra/Met	19
C2	GO:0030595	leukocyte chemotaxis	12/98	219/23328	1.38e-10	1.61e-08	1e-08	Thbs1/Il1b/Ccr2/Cxcl2/Lyst/Coro1a/Lgals3/Dusp1/Itgam/Ccl3/Mtus1/Il17ra	12
C2	GO:0043065	positive regulation of apoptotic process	18/98	645/23328	1.85e-10	1.98e-08	1.23e-08	Thbs1/Il1b/Atf3/Ctsc/Nr4a1/Egr1/Dusp1/Mcl1/Itgam/Ccl3/Ptprc/Jun/Hcar2/Slk/Top2a/Xdh/Capn2/Stk17b	18
C2	GO:0043068	positive regulation of programmed cell death	18/98	650/23328	2.09e-10	2.07e-08	1.28e-08	Thbs1/Il1b/Atf3/Ctsc/Nr4a1/Egr1/Dusp1/Mcl1/Itgam/Ccl3/Ptprc/Jun/Hcar2/Slk/Top2a/Xdh/Capn2/Stk17b	18
C2	GO:0032103	positive regulation of response to external stimulus	15/98	418/23328	2.31e-10	2.1e-08	1.3e-08	Thbs1/Nfkbiz/Il1b/Ccr2/Clec7a/Fn1/Ctsc/C3/Nfkbia/Ccl3/Alox5ap/Hmgb2/Mmp8/Il17ra/Met	15
C2	GO:0071345	cellular response to cytokine stimulus	21/98	934/23328	2.45e-10	2.1e-08	1.3e-08	Vim/Il1b/Ccr2/Cxcl2/Fn1/Coro1a/Lsp1/Zfp36/Nfkbia/Egr1/Dusp1/Ccl3/Ptprc/Klf6/Samhd1/Ifitm3/Klf4/Pirb/Nfil3/Il17ra/Actg1	21
C2	GO:0030097	hemopoiesis	21/98	953/23328	3.53e-10	2.83e-08	1.76e-08	Fos/Nfkbiz/Il1b/Ccr2/Junb/Zfp36/Nfkbia/Egr1/Pim1/Anxa2/Itgam/Ccl3/Hmgb2/Ptprc/Jun/Clec4e/Klf4/Pirb/Prkx/Top2a/Klf13	21
C2	GO:0001816	cytokine production	19/98	785/23328	5.92e-10	4.47e-08	2.77e-08	Thbs1/Il1b/Ccr2/Sorl1/Clec7a/C3/Zfp36/Egr1/Ccl3/Hmgb2/Ptprc/Mmp8/Iqgap1/Clec4e/Klf4/Srgn/Capn2/Il17ra/Met	19
C2	GO:0031349	positive regulation of defense response	12/98	278/23328	2.12e-09	1.51e-07	9.37e-08	Nfkbiz/Il1b/Ccr2/Clec7a/Ctsc/C3/Nfkbia/Ccl3/Alox5ap/Hmgb2/Mmp8/Il17ra	12
C2	GO:0000165	MAPK cascade	18/98	768/23328	2.95e-09	2e-07	1.24e-07	Thbs1/Il1b/Atf3/Sorl1/Fn1/Akap13/C3/Zfp36/Dusp1/Ccl3/Ptprc/Mmp8/Jun/Iqgap1/Klf4/Xdh/Dusp2/Met	18
C2	GO:0023014	signal transduction by protein phosphorylation	18/98	778/23328	3.62e-09	2.29e-07	1.42e-07	Thbs1/Il1b/Atf3/Sorl1/Fn1/Akap13/C3/Zfp36/Dusp1/Ccl3/Ptprc/Mmp8/Jun/Iqgap1/Klf4/Xdh/Dusp2/Met	18
C2	GO:0050900	leukocyte migration	13/98	360/23328	3.74e-09	2.29e-07	1.42e-07	Thbs1/Il1b/Ccr2/Cxcl2/Lyst/Coro1a/Lgals3/Dusp1/Itgam/Ccl3/Mtus1/Myo1g/Il17ra	13
C2	GO:0043408	regulation of MAPK cascade	17/98	717/23328	7.24e-09	4.22e-07	2.62e-07	Thbs1/Il1b/Atf3/Sorl1/Fn1/Akap13/C3/Dusp1/Ccl3/Ptprc/Mmp8/Jun/Iqgap1/Klf4/Xdh/Dusp2/Met	17
C2	GO:0030155	regulation of cell adhesion	17/98	723/23328	8.19e-09	4.57e-07	2.84e-07	Thbs1/Nfkbiz/Il1b/Ccr2/Fn1/Coro1a/Lgals3/Dusp1/Cytip/Ptprc/Iqgap1/Slk/Myo1f/Klf4/Prkx/S100a10/Actg1	17
C2	GO:1903706	regulation of hemopoiesis	13/98	424/23328	2.61e-08	1.37e-06	8.54e-07	Fos/Nfkbiz/Il1b/Ccr2/Zfp36/Nfkbia/Pim1/Itgam/Ccl3/Hmgb2/Ptprc/Jun/Klf13	13
C2	GO:0031347	regulation of defense response	15/98	594/23328	2.68e-08	1.37e-06	8.54e-07	Nfkbiz/Il1b/Ccr2/Clec7a/Ctsc/C3/Zfp36/Nfkbia/Ccl3/Alox5ap/Hmgb2/Mmp8/Samhd1/Myo1f/Il17ra	15
C2	GO:0097529	myeloid leukocyte migration	10/98	219/23328	2.95e-08	1.46e-06	9.04e-07	Thbs1/Il1b/Ccr2/Cxcl2/Lgals3/Dusp1/Itgam/Ccl3/Mtus1/Il17ra	10
C2	GO:0019221	cytokine-mediated signaling pathway	12/98	369/23328	4.92e-08	2.34e-06	1.45e-06	Il1b/Ccr2/Cxcl2/Nfkbia/Egr1/Ccl3/Ptprc/Klf6/Samhd1/Ifitm3/Pirb/Il17ra	12
C2	GO:0001819	positive regulation of cytokine production	13/98	449/23328	5.1e-08	2.34e-06	1.45e-06	Thbs1/Il1b/Ccr2/Sorl1/Clec7a/C3/Egr1/Ccl3/Hmgb2/Ptprc/Mmp8/Clec4e/Il17ra	13
C2	GO:0050727	regulation of inflammatory response	12/98	372/23328	5.37e-08	2.38e-06	1.48e-06	Nfkbiz/Il1b/Ccr2/Clec7a/Ctsc/C3/Zfp36/Nfkbia/Ccl3/Alox5ap/Mmp8/Il17ra	12
C2	GO:1901216	positive regulation of neuron death	8/98	126/23328	6.07e-08	2.59e-06	1.61e-06	Fos/Il1b/Egr1/Mcl1/Itgam/Ccl3/Jun/Capn2	8
C2	GO:0048514	blood vessel morphogenesis	15/98	648/23328	8.35e-08	3.43e-06	2.13e-06	Thbs1/Il1b/Ccr2/Cybb/Fn1/Lgals3/Junb/C3/Nr4a1/Anxa2/Jun/Klf4/Prkx/Xdh/Actg1	15
C2	GO:0001568	blood vessel development	16/98	747/23328	8.56e-08	3.43e-06	2.13e-06	Thbs1/Il1b/Ccr2/Cybb/Fn1/Lgals3/Junb/C3/Nr4a1/Egr1/Anxa2/Jun/Klf4/Prkx/Xdh/Actg1	16
C2	GO:0030335	positive regulation of cell migration	14/98	564/23328	1.01e-07	3.91e-06	2.43e-06	Thbs1/Il1b/Ccr2/Clec7a/Fn1/Coro1a/Lgals3/Egr1/Ptprc/Jun/Iqgap1/Myo1f/Actg1/Met	14
C2	GO:0009611	response to wounding	13/98	492/23328	1.47e-07	5.54e-06	3.44e-06	Thbs1/F13a1/Ccr2/Clec7a/Lyst/Fn1/C3/Zfp36/Anxa2/Jun/Klf4/Lilrb4a/Actg1	13
C2	GO:0001944	vasculature development	16/98	781/23328	1.57e-07	5.74e-06	3.56e-06	Thbs1/Il1b/Ccr2/Cybb/Fn1/Lgals3/Junb/C3/Nr4a1/Egr1/Anxa2/Jun/Klf4/Prkx/Xdh/Actg1	16
C2	GO:2000147	positive regulation of cell motility	14/98	587/23328	1.64e-07	5.77e-06	3.59e-06	Thbs1/Il1b/Ccr2/Clec7a/Fn1/Coro1a/Lgals3/Egr1/Ptprc/Jun/Iqgap1/Myo1f/Actg1/Met	14
C2	GO:0001906	cell killing	9/98	200/23328	1.7e-07	5.77e-06	3.59e-06	Cxcl2/Clec7a/Lyst/Ctsc/Coro1a/Lgals3/C3/Itgam/Ptprc	9
C2	GO:0030099	myeloid cell differentiation	12/98	414/23328	1.71e-07	5.77e-06	3.59e-06	Fos/Junb/Zfp36/Nfkbia/Anxa2/Itgam/Ccl3/Hmgb2/Jun/Pirb/Prkx/Klf13	12
C2	GO:0070997	neuron death	12/98	416/23328	1.8e-07	5.92e-06	3.68e-06	Fos/Il1b/Cxcl2/Sorl1/Coro1a/Btg2/Egr1/Mcl1/Itgam/Ccl3/Jun/Capn2	12
C2	GO:0040017	positive regulation of locomotion	14/98	603/23328	2.27e-07	7.28e-06	4.52e-06	Thbs1/Il1b/Ccr2/Clec7a/Fn1/Coro1a/Lgals3/Egr1/Ptprc/Jun/Iqgap1/Myo1f/Actg1/Met	14
C2	GO:0051272	positive regulation of cellular component movement	14/98	608/23328	2.51e-07	7.84e-06	4.87e-06	Thbs1/Il1b/Ccr2/Clec7a/Fn1/Coro1a/Lgals3/Egr1/Ptprc/Jun/Iqgap1/Myo1f/Actg1/Met	14
C2	GO:0006909	phagocytosis	11/98	358/23328	3.25e-07	9.92e-06	6.16e-06	Thbs1/Il1b/Ccr2/Clec7a/Lyst/Coro1a/C3/Itgam/Ptprc/Myo1g/Met	11
C2	GO:0001525	angiogenesis	13/98	537/23328	3.98e-07	1.19e-05	7.37e-06	Thbs1/Il1b/Ccr2/Cybb/Fn1/Lgals3/C3/Nr4a1/Anxa2/Jun/Klf4/Prkx/Actg1	13
C2	GO:1903708	positive regulation of hemopoiesis	9/98	224/23328	4.43e-07	1.29e-05	8.03e-06	Fos/Nfkbiz/Il1b/Ccr2/Itgam/Ccl3/Hmgb2/Ptprc/Jun	9
C2	GO:1901214	regulation of neuron death	11/98	377/23328	5.41e-07	1.54e-05	9.59e-06	Fos/Il1b/Sorl1/Coro1a/Btg2/Egr1/Mcl1/Itgam/Ccl3/Jun/Capn2	11
C2	GO:0051493	regulation of cytoskeleton organization	13/98	557/23328	6e-07	1.67e-05	1.04e-05	Coro1a/Tmsb10/Gda/Akap13/Kif11/Arhgdib/Add3/Iqgap1/Myo1f/Capn2/S100a10/Actg1/Met	13
C2	GO:0046777	protein autophosphorylation	9/98	241/23328	8.17e-07	2.23e-05	1.39e-05	Pim1/Ptprc/Jun/Iqgap1/Slk/Prkx/Stk17b/Ppp2r5a/Met	9
C2	GO:1902107	positive regulation of leukocyte differentiation	8/98	180/23328	9.37e-07	2.5e-05	1.55e-05	Fos/Nfkbiz/Il1b/Ccr2/Itgam/Ccl3/Ptprc/Jun	8
C2	GO:0071621	granulocyte chemotaxis	7/98	126/23328	1.04e-06	2.72e-05	1.69e-05	Thbs1/Il1b/Cxcl2/Lgals3/Itgam/Ccl3/Il17ra	7
C2	GO:0002521	leukocyte differentiation	13/98	586/23328	1.06e-06	2.72e-05	1.69e-05	Fos/Nfkbiz/Il1b/Ccr2/Junb/Egr1/Anxa2/Itgam/Ccl3/Ptprc/Jun/Clec4e/Pirb	13
C2	GO:0002252	immune effector process	16/98	912/23328	1.23e-06	3.09e-05	1.92e-05	Nfkbiz/Il1b/Ccr2/Lyst/Ctsc/Coro1a/Lgals3/C3/Itgam/Ptprc/Clec4e/Samhd1/Myo1f/Ifitm3/Pirb/Myo1g	16
C2	GO:0035239	tube morphogenesis	16/98	937/23328	1.74e-06	4.3e-05	2.67e-05	Thbs1/Il1b/Ccr2/Cybb/Fn1/Lgals3/Junb/C3/Nr4a1/Anxa2/Jun/Klf4/Prkx/Xdh/Actg1/Met	16
C2	GO:0042060	wound healing	10/98	349/23328	2.15e-06	5.21e-05	3.23e-05	Thbs1/F13a1/Ccr2/Clec7a/Lyst/Fn1/C3/Anxa2/Lilrb4a/Actg1	10
C2	GO:0097435	supramolecular fiber organization	14/98	730/23328	2.19e-06	5.21e-05	3.23e-05	Vim/Coro1a/Tmsb10/Gda/Akap13/Anxa2/Tpm4/Add3/Slk/Myo1f/Myo1g/S100a10/Actg1/Met	14
C2	GO:0009617	response to bacterium	16/98	974/23328	2.87e-06	6.67e-05	4.14e-05	Lyz2/Vim/Il1b/Cxcl2/Hp/Lyst/C3/Zfp36/Nfkbia/Slfn2/Hmgb2/Clec4e/Myo1f/Lilrb4a/Mpeg1/Cd52	16
C2	GO:0032956	regulation of actin cytoskeleton organization	10/98	361/23328	2.91e-06	6.67e-05	4.14e-05	Coro1a/Tmsb10/Akap13/Arhgdib/Add3/Iqgap1/Myo1f/S100a10/Actg1/Met	10
C2	GO:0008284	positive regulation of cell population proliferation	16/98	996/23328	3.82e-06	8.6e-05	5.34e-05	Thbs1/Vim/Il1b/Ccr2/Atf3/Clec7a/Fn1/Coro1a/Lgals3/Nr4a1/Egr1/Pim1/Anxa2/Hmgb2/Ptprc/Jun	16
C2	GO:0072593	reactive oxygen species metabolic process	9/98	292/23328	3.96e-06	8.77e-05	5.44e-05	Thbs1/Il1b/Cybb/Hp/Itgam/Mmp8/Klf4/Xdh/Met	9
C2	GO:0097530	granulocyte migration	7/98	155/23328	4.16e-06	9.05e-05	5.62e-05	Thbs1/Il1b/Cxcl2/Lgals3/Itgam/Ccl3/Il17ra	7
C2	GO:0010563	negative regulation of phosphorus metabolic process	12/98	566/23328	4.52e-06	9.5e-05	5.9e-05	Il1b/Atf3/Sorl1/Dusp1/Ptprc/Jun/Iqgap1/Klf4/Xdh/Dusp2/Ppp2r5a/Met	12
C2	GO:0045936	negative regulation of phosphate metabolic process	12/98	566/23328	4.52e-06	9.5e-05	5.9e-05	Il1b/Atf3/Sorl1/Dusp1/Ptprc/Jun/Iqgap1/Klf4/Xdh/Dusp2/Ppp2r5a/Met	12
C2	GO:0042326	negative regulation of phosphorylation	11/98	471/23328	4.67e-06	9.66e-05	6e-05	Il1b/Atf3/Sorl1/Dusp1/Ptprc/Jun/Klf4/Xdh/Dusp2/Ppp2r5a/Met	11
C2	GO:0045637	regulation of myeloid cell differentiation	8/98	224/23328	4.78e-06	9.73e-05	6.04e-05	Fos/Zfp36/Nfkbia/Itgam/Ccl3/Hmgb2/Jun/Klf13	8
C2	GO:0043405	regulation of MAP kinase activity	9/98	301/23328	5.07e-06	0.000101606	6.31e-05	Thbs1/Il1b/Sorl1/Akap13/Dusp1/Ptprc/Iqgap1/Dusp2/Met	9
C2	GO:0002696	positive regulation of leukocyte activation	11/98	479/23328	5.48e-06	0.000108143	6.72e-05	Thbs1/Nfkbiz/Il1b/Ccr2/Clec7a/Lyst/Ctsc/Coro1a/Itgam/Ptprc/Mmp8	11
C2	GO:0002274	myeloid leukocyte activation	8/98	231/23328	5.99e-06	0.000116469	7.23e-05	Thbs1/Ccr2/Ctsc/Itgam/Mmp8/Jun/Myo1f/Pirb	8
C2	GO:0070372	regulation of ERK1 and ERK2 cascade	9/98	308/23328	6.1e-06	0.000116849	7.26e-05	Il1b/Atf3/Fn1/C3/Dusp1/Ccl3/Ptprc/Jun/Klf4	9
C2	GO:2001236	regulation of extrinsic apoptotic signaling pathway	7/98	165/23328	6.28e-06	0.000118565	7.36e-05	Thbs1/Il1b/Atf3/Lgals3/Mcl1/Hmgb2/Ptprc	7
C2	GO:0007596	blood coagulation	7/98	166/23328	6.54e-06	0.000121575	7.55e-05	Thbs1/F13a1/Lyst/Fn1/C3/Anxa2/Lilrb4a	7
C2	GO:0007599	hemostasis	7/98	168/23328	7.07e-06	0.000129633	8.05e-05	Thbs1/F13a1/Lyst/Fn1/C3/Anxa2/Lilrb4a	7
C2	GO:0050817	coagulation	7/98	169/23328	7.35e-06	0.000132876	8.25e-05	Thbs1/F13a1/Lyst/Fn1/C3/Anxa2/Lilrb4a	7
C2	GO:0050867	positive regulation of cell activation	11/98	496/23328	7.61e-06	0.000135669	8.43e-05	Thbs1/Nfkbiz/Il1b/Ccr2/Clec7a/Lyst/Ctsc/Coro1a/Itgam/Ptprc/Mmp8	11
C2	GO:0030036	actin cytoskeleton organization	13/98	705/23328	7.96e-06	0.000139953	8.69e-05	Coro1a/Tmsb10/Akap13/Tpm4/Arhgdib/Add3/Iqgap1/Myo1f/Myo1g/S100a10/Arhgap26/Actg1/Met	13
C2	GO:0051235	maintenance of location	9/98	320/23328	8.3e-06	0.000143835	8.93e-05	Il1b/Sorl1/Coro1a/Tmsb10/C3/Nfkbia/Ptprc/Srgn/Soat1	9
C2	GO:0043409	negative regulation of MAPK cascade	7/98	173/23328	8.57e-06	0.000145145	9.01e-05	Il1b/Atf3/Sorl1/Dusp1/Ptprc/Klf4/Dusp2	7
C2	GO:0010035	response to inorganic substance	11/98	503/23328	8.68e-06	0.000145145	9.01e-05	Thbs1/Fos/Hp/Fn1/Junb/Nr4a1/Alox5ap/Jun/Iqgap1/Xdh/Met	11
C2	GO:2000379	positive regulation of reactive oxygen species metabolic process	6/98	114/23328	8.71e-06	0.000145145	9.01e-05	Thbs1/Il1b/Itgam/Mmp8/Klf4/Xdh	6
C2	GO:0032970	regulation of actin filament-based process	10/98	410/23328	8.92e-06	0.000146656	9.11e-05	Coro1a/Tmsb10/Akap13/Arhgdib/Add3/Iqgap1/Myo1f/S100a10/Actg1/Met	10
C2	GO:0001776	leukocyte homeostasis	6/98	115/23328	9.16e-06	0.000148755	9.24e-05	Ccr2/Coro1a/Itgam/Hcar2/Pirb/Lilrb4a	6
C2	GO:0070371	ERK1 and ERK2 cascade	9/98	325/23328	9.39e-06	0.000150626	9.36e-05	Il1b/Atf3/Fn1/C3/Dusp1/Ccl3/Ptprc/Jun/Klf4	9
C2	GO:1902532	negative regulation of intracellular signal transduction	11/98	513/23328	1.04e-05	0.000165384	0.000102717	Thbs1/Il1b/Atf3/Sorl1/Dusp1/Mcl1/Ptprc/Klf4/Xdh/Dusp2/Met	11
C2	GO:0048872	homeostasis of number of cells	9/98	330/23328	1.06e-05	0.000166005	0.000103102	Ccr2/Coro1a/Zfp36/Itgam/Hmgb2/Hcar2/Pirb/Lilrb4a/Klf13	9
C2	GO:0001933	negative regulation of protein phosphorylation	10/98	425/23328	1.22e-05	0.000188203	0.000116888	Il1b/Atf3/Sorl1/Dusp1/Ptprc/Jun/Klf4/Xdh/Dusp2/Met	10
C2	GO:0002443	leukocyte mediated immunity	11/98	523/23328	1.25e-05	0.000188678	0.000117184	Il1b/Ccr2/Lyst/Ctsc/Coro1a/C3/Itgam/Ptprc/Myo1f/Pirb/Myo1g	11
C2	GO:0043410	positive regulation of MAPK cascade	11/98	523/23328	1.25e-05	0.000188678	0.000117184	Thbs1/Il1b/Akap13/C3/Ccl3/Ptprc/Mmp8/Jun/Iqgap1/Xdh/Met	11
C2	GO:0002262	myeloid cell homeostasis	7/98	187/23328	1.42e-05	0.000212114	0.000131739	Ccr2/Zfp36/Itgam/Hmgb2/Hcar2/Lilrb4a/Klf13	7
C2	GO:0051592	response to calcium ion	6/98	128/23328	1.69e-05	0.000248832	0.000154544	Thbs1/Fos/Junb/Alox5ap/Jun/Iqgap1	6
C2	GO:0071900	regulation of protein serine/threonine kinase activity	10/98	442/23328	1.71e-05	0.000248832	0.000154544	Thbs1/Il1b/Sorl1/Akap13/Pim1/Dusp1/Ptprc/Iqgap1/Dusp2/Met	10
C2	GO:0031589	cell-substrate adhesion	9/98	351/23328	1.73e-05	0.000249564	0.000154999	Thbs1/Fn1/Coro1a/Iqgap1/Slk/Prkx/Myo1g/S100a10/Actg1	9
C2	GO:0045087	innate immune response	14/98	879/23328	1.81e-05	0.000255129	0.000158455	Vim/Cybb/Lyst/Coro1a/Lgals3/C3/Ccl3/Hmgb2/Clec4e/Samhd1/Myo1f/Ifitm3/Mpeg1/Actg1	14
C2	GO:0051338	regulation of transferase activity	14/98	879/23328	1.81e-05	0.000255129	0.000158455	Thbs1/Il1b/Sorl1/Akap13/Zfp36/Egr1/Pim1/Dusp1/Ptprc/Iqgap1/Klf4/Dusp2/Ppp2r5a/Met	14
C2	GO:0050878	regulation of body fluid levels	9/98	354/23328	1.85e-05	0.000256424	0.000159259	Thbs1/F13a1/Lyst/Fn1/C3/Anxa2/Xdh/Lilrb4a/Met	9
C2	GO:0043523	regulation of neuron apoptotic process	8/98	270/23328	1.86e-05	0.000256424	0.000159259	Il1b/Coro1a/Btg2/Egr1/Mcl1/Itgam/Ccl3/Jun	8
C2	GO:1901342	regulation of vasculature development	9/98	356/23328	1.94e-05	0.000264177	0.000164074	Thbs1/Il1b/Ccr2/Cybb/Lgals3/C3/Egr1/Klf4/Xdh	9
C2	GO:0002456	T cell mediated immunity	6/98	132/23328	2.01e-05	0.000271803	0.000168811	Il1b/Ccr2/Lyst/Ctsc/Ptprc/Myo1g	6
C2	GO:0010038	response to metal ion	8/98	274/23328	2.07e-05	0.000276044	0.000171444	Thbs1/Fos/Fn1/Junb/Alox5ap/Jun/Iqgap1/Xdh	8
C2	GO:2000377	regulation of reactive oxygen species metabolic process	7/98	207/23328	2.74e-05	0.000356229	0.000221246	Thbs1/Il1b/Hp/Itgam/Mmp8/Klf4/Xdh	7
C2	GO:0002366	leukocyte activation involved in immune response	8/98	285/23328	2.74e-05	0.000356229	0.000221246	Nfkbiz/Ccr2/Coro1a/Lgals3/Itgam/Ptprc/Clec4e/Myo1f	8
C2	GO:0030029	actin filament-based process	13/98	793/23328	2.75e-05	0.000356229	0.000221246	Coro1a/Tmsb10/Akap13/Tpm4/Arhgdib/Add3/Iqgap1/Myo1f/Myo1g/S100a10/Arhgap26/Actg1/Met	13
C2	GO:1904018	positive regulation of vasculature development	7/98	208/23328	2.82e-05	0.000361895	0.000224765	Thbs1/Il1b/Cybb/Lgals3/C3/Egr1/Klf4	7
C2	GO:0002263	cell activation involved in immune response	8/98	289/23328	3.02e-05	0.000383812	0.000238377	Nfkbiz/Ccr2/Coro1a/Lgals3/Itgam/Ptprc/Clec4e/Myo1f	8
C2	GO:0042098	T cell proliferation	7/98	213/23328	3.28e-05	0.000412907	0.000256447	Il1b/Ccr2/Coro1a/Lgals3/Itgam/Ptprc/Lilrb4a	7
C2	GO:0002694	regulation of leukocyte activation	12/98	692/23328	3.33e-05	0.000415388	0.000257988	Thbs1/Nfkbiz/Il1b/Ccr2/Clec7a/Lyst/Ctsc/Coro1a/Lgals3/Itgam/Ptprc/Mmp8	12
C2	GO:0051402	neuron apoptotic process	8/98	298/23328	3.76e-05	0.000463287	0.000287737	Il1b/Coro1a/Btg2/Egr1/Mcl1/Itgam/Ccl3/Jun	8
C2	GO:0001935	endothelial cell proliferation	6/98	149/23328	3.98e-05	0.000486815	0.000302349	Thbs1/Nr4a1/Hmgb2/Jun/Prkx/Xdh	6
C2	GO:0002573	myeloid leukocyte differentiation	7/98	220/23328	4.03e-05	0.000488074	0.000303132	Fos/Junb/Anxa2/Itgam/Ccl3/Jun/Pirb	7
C2	GO:0043069	negative regulation of programmed cell death	14/98	951/23328	4.29e-05	0.00051422	0.00031937	Thbs1/Il1b/Fn1/Coro1a/Lgals3/Btg2/Nr4a1/Pim1/Dusp1/Mcl1/Hmgb2/Jun/Klf4/Met	14
C2	GO:0050920	regulation of chemotaxis	7/98	224/23328	4.52e-05	0.000537014	0.000333527	Thbs1/Il1b/Ccr2/Fn1/Dusp1/Mtus1/Met	7
C2	GO:1902105	regulation of leukocyte differentiation	8/98	309/23328	4.85e-05	0.00057082	0.000354523	Fos/Nfkbiz/Il1b/Ccr2/Itgam/Ccl3/Ptprc/Jun	8
C2	GO:0071241	cellular response to inorganic substance	7/98	227/23328	4.92e-05	0.000573554	0.000356221	Thbs1/Fos/Fn1/Junb/Alox5ap/Jun/Iqgap1	7
C2	GO:0009895	negative regulation of catabolic process	8/98	311/23328	5.07e-05	0.000586542	0.000364288	Il1b/Sorl1/Hp/Zfp36/Anxa2/Mcl1/Hcar2/Usp25	8
C2	GO:0071248	cellular response to metal ion	6/98	156/23328	5.15e-05	0.000589841	0.000366337	Fos/Fn1/Junb/Alox5ap/Jun/Iqgap1	6
C2	GO:0051726	regulation of cell cycle	14/98	969/23328	5.25e-05	0.000596172	0.000370269	Thbs1/Il1b/Junb/Btg2/Nr4a1/Mki67/Pim1/Kif11/Ptprc/Jun/Iqgap1/Klf4/Top2a/Met	14
C2	GO:0071363	cellular response to growth factor stimulus	11/98	613/23328	5.34e-05	0.000600911	0.000373212	Thbs1/Fos/Sorl1/Coro1a/Nr4a1/Zfp36/Egr1/Jun/Iqgap1/Klf4/Xdh	11
C2	GO:0097191	extrinsic apoptotic signaling pathway	7/98	233/23328	5.8e-05	0.00064679	0.000401707	Thbs1/Il1b/Atf3/Lgals3/Mcl1/Hmgb2/Ptprc	7
C2	GO:0042110	T cell activation	10/98	514/23328	6.11e-05	0.000670861	0.000416657	Nfkbiz/Il1b/Ccr2/Coro1a/Lgals3/Egr1/Itgam/Ptprc/Clec4e/Lilrb4a	10
C2	GO:0050865	regulation of cell activation	12/98	737/23328	6.12e-05	0.000670861	0.000416657	Thbs1/Nfkbiz/Il1b/Ccr2/Clec7a/Lyst/Ctsc/Coro1a/Lgals3/Itgam/Ptprc/Mmp8	12
C2	GO:0044087	regulation of cellular component biogenesis	14/98	984/23328	6.19e-05	0.000673284	0.000418162	Il1b/Sorl1/Coro1a/Lgals3/Tmsb10/Gda/Akap13/Add3/Iqgap1/Slk/Asap1/S100a10/Actg1/Met	14
C2	GO:0070848	response to growth factor	11/98	626/23328	6.44e-05	0.000693039	0.000430431	Thbs1/Fos/Sorl1/Coro1a/Nr4a1/Zfp36/Egr1/Jun/Iqgap1/Klf4/Xdh	11
C2	GO:0042116	macrophage activation	5/98	100/23328	6.48e-05	0.000693039	0.000430431	Thbs1/Ctsc/Itgam/Mmp8/Jun	5
C2	GO:0002444	myeloid leukocyte mediated immunity	5/98	105/23328	8.18e-05	0.000867056	0.000538508	Ccr2/Lyst/C3/Itgam/Myo1f	5
C2	GO:0002449	lymphocyte mediated immunity	9/98	432/23328	8.66e-05	0.000910464	0.000565468	Il1b/Ccr2/Lyst/Ctsc/Coro1a/C3/Ptprc/Pirb/Myo1g	9
C2	GO:0045785	positive regulation of cell adhesion	9/98	435/23328	9.12e-05	0.00094758	0.00058852	Thbs1/Nfkbiz/Il1b/Ccr2/Fn1/Coro1a/Ptprc/Iqgap1/S100a10	9
C2	GO:0043549	regulation of kinase activity	12/98	769/23328	9.16e-05	0.00094758	0.00058852	Thbs1/Il1b/Sorl1/Akap13/Egr1/Pim1/Dusp1/Ptprc/Iqgap1/Dusp2/Ppp2r5a/Met	12
C2	GO:0045639	positive regulation of myeloid cell differentiation	5/98	108/23328	9.35e-05	0.00095933	0.000595818	Fos/Itgam/Ccl3/Hmgb2/Jun	5
C2	GO:0007015	actin filament organization	9/98	437/23328	9.45e-05	0.000962017	0.000597487	Coro1a/Tmsb10/Tpm4/Add3/Myo1f/Myo1g/S100a10/Actg1/Met	9
C2	GO:0002526	acute inflammatory response	5/98	110/23328	0.000101947	0.00102991	0.000639652	Il1b/Hp/Fn1/C3/Alox5ap	5
C2	GO:0007159	leukocyte cell-cell adhesion	8/98	345/23328	0.000104518	0.00104763	0.00065066	Nfkbiz/Il1b/Ccr2/Coro1a/Lgals3/Itgam/Ptprc/Klf4	8
C2	GO:0002460	adaptive immune response based on somatic recombination of immune receptors built from immunoglobulin superfamily domains	9/98	445/23328	0.000108377	0.00107789	0.000669452	Nfkbiz/Il1b/Ccr2/Lyst/Ctsc/C3/Ptprc/Pirb/Myo1g	9
C2	GO:0014706	striated muscle tissue development	9/98	447/23328	0.000112108	0.00110642	0.000687172	Fos/Atf3/Btg2/Akap13/Nr4a1/Egr1/Pim1/Met/Ifrd1	9
C2	GO:0001818	negative regulation of cytokine production	7/98	260/23328	0.000115026	0.00111802	0.000694375	Thbs1/Zfp36/Ptprc/Mmp8/Klf4/Srgn/Met	7
C2	GO:0051348	negative regulation of transferase activity	7/98	260/23328	0.000115026	0.00111802	0.000694375	Il1b/Sorl1/Zfp36/Dusp1/Ptprc/Dusp2/Ppp2r5a	7
C2	GO:0045859	regulation of protein kinase activity	11/98	673/23328	0.000122242	0.00117922	0.000732388	Thbs1/Il1b/Sorl1/Akap13/Egr1/Pim1/Dusp1/Ptprc/Iqgap1/Dusp2/Met	11
C2	GO:0043066	negative regulation of apoptotic process	13/98	931/23328	0.000139607	0.00133669	0.000830186	Thbs1/Il1b/Fn1/Coro1a/Lgals3/Btg2/Nr4a1/Pim1/Dusp1/Mcl1/Hmgb2/Jun/Klf4	13
C2	GO:0002683	negative regulation of immune system process	9/98	462/23328	0.00014368	0.00135864	0.00084382	Thbs1/Ccr2/Lgals3/Zfp36/Nfkbia/Dusp1/Ptprc/Samhd1/Klf13	9
C2	GO:0045766	positive regulation of angiogenesis	6/98	188/23328	0.000144018	0.00135864	0.00084382	Thbs1/Il1b/Cybb/Lgals3/C3/Klf4	6
C2	GO:0001952	regulation of cell-matrix adhesion	5/98	119/23328	0.00014767	0.00138293	0.000858905	Thbs1/Iqgap1/Slk/S100a10/Actg1	5
C2	GO:0002688	regulation of leukocyte chemotaxis	5/98	121/23328	0.000159674	0.0014845	0.000921992	Thbs1/Il1b/Ccr2/Dusp1/Mtus1	5
C2	GO:0060537	muscle tissue development	9/98	470/23328	0.000163356	0.00150781	0.000936469	Fos/Atf3/Btg2/Akap13/Nr4a1/Egr1/Pim1/Met/Ifrd1	9
C2	GO:0034599	cellular response to oxidative stress	7/98	276/23328	0.000166258	0.00152364	0.000946296	Thbs1/Fos/Mcl1/Itgam/Jun/Gsr/Met	7
C2	GO:1902903	regulation of supramolecular fiber organization	8/98	370/23328	0.000168846	0.00153638	0.000954209	Coro1a/Tmsb10/Gda/Akap13/Add3/S100a10/Actg1/Met	8
C2	GO:0008285	negative regulation of cell population proliferation	11/98	699/23328	0.000170091	0.00153681	0.000954478	Thbs1/Il1b/Lgals3/Btg2/Dusp1/Slfn2/Jun/Ifitm3/Klf4/Xdh/Klf13	11
C2	GO:1990266	neutrophil migration	5/98	124/23328	0.000179061	0.00158986	0.000987426	Il1b/Cxcl2/Lgals3/Itgam/Ccl3	5
C2	GO:0007519	skeletal muscle tissue development	6/98	196/23328	0.00018062	0.00158986	0.000987426	Fos/Atf3/Btg2/Nr4a1/Egr1/Met	6
C2	GO:0043086	negative regulation of catalytic activity	11/98	704/23328	0.000180919	0.00158986	0.000987426	Thbs1/Il1b/Sorl1/Hp/Nr4a1/Zfp36/Dusp1/Ptprc/Klf4/Dusp2/Ppp2r5a	11
C2	GO:0061061	muscle structure development	11/98	704/23328	0.000180919	0.00158986	0.000987426	Fos/Atf3/Btg2/Akap13/Nr4a1/Egr1/Pim1/Capn2/Actg1/Met/Ifrd1	11
C2	GO:0051347	positive regulation of transferase activity	10/98	591/23328	0.000191459	0.00167103	0.00103784	Thbs1/Il1b/Sorl1/Akap13/Egr1/Pim1/Ptprc/Iqgap1/Klf4/Met	10
C2	GO:0031400	negative regulation of protein modification process	10/98	592/23328	0.000194079	0.00168137	0.00104426	Il1b/Atf3/Sorl1/Dusp1/Ptprc/Jun/Klf4/Xdh/Dusp2/Met	10
C2	GO:0009991	response to extracellular stimulus	8/98	378/23328	0.000195264	0.00168137	0.00104426	Fos/Atf3/Sorl1/Zfp36/Pim1/Ptprc/Jun/Lilrb4a	8
C2	GO:0051099	positive regulation of binding	6/98	200/23328	0.000201486	0.00172338	0.00107035	Anxa2/Hmgb2/Mmp8/Klf4/S100a10/Met	6
C2	GO:0002285	lymphocyte activation involved in immune response	6/98	203/23328	0.00021835	0.00185525	0.00115225	Nfkbiz/Ccr2/Coro1a/Lgals3/Ptprc/Clec4e	6
C2	GO:0050776	regulation of immune response	12/98	845/23328	0.000220034	0.00185726	0.0011535	Nfkbiz/Il1b/Ccr2/Lgals3/C3/Itgam/Hmgb2/Ptprc/Clec4e/Samhd1/Myo1f/Myo1g	12
C2	GO:0071902	positive regulation of protein serine/threonine kinase activity	7/98	291/23328	0.000229751	0.0019266	0.00119657	Thbs1/Il1b/Akap13/Pim1/Ptprc/Iqgap1/Met	7
C2	GO:0060538	skeletal muscle organ development	6/98	206/23328	0.000236307	0.00196872	0.00122273	Fos/Atf3/Btg2/Nr4a1/Egr1/Met	6
C2	GO:0051098	regulation of binding	8/98	390/23328	0.000241196	0.00199648	0.00123997	Sorl1/Anxa2/Hmgb2/Mmp8/Jun/Klf4/S100a10/Met	8
C2	GO:0060627	regulation of vesicle-mediated transport	10/98	611/23328	0.000249904	0.0020553	0.0012765	Il1b/Ccr2/Sorl1/Clec7a/Coro1a/Lgals3/C3/Anxa2/Itgam/Ptprc	10
C2	GO:0001936	regulation of endothelial cell proliferation	5/98	134/23328	0.000256893	0.00209932	0.00130384	Thbs1/Nr4a1/Hmgb2/Jun/Xdh	5
C2	GO:0097190	apoptotic signaling pathway	10/98	614/23328	0.000259844	0.00211	0.00131047	Thbs1/Il1b/Atf3/Ctsc/Lgals3/Mcl1/Itgam/Hmgb2/Ptprc/Jun	10
C2	GO:0007160	cell-matrix adhesion	6/98	214/23328	0.000289925	0.00231143	0.00143557	Thbs1/Fn1/Iqgap1/Slk/S100a10/Actg1	6
C2	GO:0010810	regulation of cell-substrate adhesion	6/98	214/23328	0.000289925	0.00231143	0.00143557	Thbs1/Fn1/Iqgap1/Slk/S100a10/Actg1	6
C2	GO:0046649	lymphocyte activation	12/98	871/23328	0.000290054	0.00231143	0.00143557	Nfkbiz/Il1b/Ccr2/Clec7a/Lyst/Coro1a/Lgals3/Egr1/Itgam/Ptprc/Clec4e/Lilrb4a	12
C2	GO:0002685	regulation of leukocyte migration	6/98	217/23328	0.00031233	0.00247357	0.00153628	Thbs1/Il1b/Ccr2/Lgals3/Dusp1/Mtus1	6
C2	GO:0001909	leukocyte mediated cytotoxicity	5/98	141/23328	0.000325039	0.00255843	0.00158898	Lyst/Ctsc/Coro1a/Itgam/Ptprc	5
C2	GO:1903037	regulation of leukocyte cell-cell adhesion	7/98	309/23328	0.000330376	0.00257323	0.00159817	Nfkbiz/Il1b/Ccr2/Coro1a/Lgals3/Ptprc/Klf4	7
C2	GO:0006979	response to oxidative stress	8/98	409/23328	0.000331796	0.00257323	0.00159817	Thbs1/Fos/Hp/Mcl1/Itgam/Jun/Gsr/Met	8
C2	GO:0051129	negative regulation of cellular component organization	11/98	756/23328	0.000332935	0.00257323	0.00159817	Vim/Il1b/Sorl1/Coro1a/Lgals3/Tmsb10/Add3/Asap1/Top2a/Met/Ifrd1	11
C2	GO:2001233	regulation of apoptotic signaling pathway	8/98	413/23328	0.000354025	0.00271985	0.00168924	Thbs1/Il1b/Atf3/Ctsc/Lgals3/Mcl1/Hmgb2/Ptprc	8
C2	GO:0046651	lymphocyte proliferation	7/98	317/23328	0.000385186	0.00294163	0.00182698	Il1b/Ccr2/Coro1a/Lgals3/Itgam/Ptprc/Lilrb4a	7
C2	GO:0043406	positive regulation of MAP kinase activity	6/98	226/23328	0.000387789	0.00294398	0.00182844	Thbs1/Il1b/Akap13/Ptprc/Iqgap1/Met	6
C2	GO:0002824	positive regulation of adaptive immune response based on somatic recombination of immune receptors built from immunoglobulin superfamily domains	5/98	147/23328	0.000393653	0.00297093	0.00184517	Nfkbiz/Il1b/Ccr2/C3/Ptprc	5
C2	GO:0033673	negative regulation of kinase activity	6/98	227/23328	0.000396982	0.00297853	0.0018499	Il1b/Sorl1/Dusp1/Ptprc/Dusp2/Ppp2r5a	6
C2	GO:0032943	mononuclear cell proliferation	7/98	320/23328	0.000407526	0.00300492	0.00186629	Il1b/Ccr2/Coro1a/Lgals3/Itgam/Ptprc/Lilrb4a	7
C2	GO:0045765	regulation of angiogenesis	7/98	320/23328	0.000407526	0.00300492	0.00186629	Thbs1/Il1b/Ccr2/Cybb/Lgals3/C3/Klf4	7
C2	GO:0071216	cellular response to biotic stimulus	7/98	320/23328	0.000407526	0.00300492	0.00186629	Vim/Il1b/Cxcl2/Clec7a/Zfp36/Nfkbia/Lilrb4a	7
C2	GO:0050921	positive regulation of chemotaxis	5/98	149/23328	0.000418793	0.00307035	0.00190692	Thbs1/Il1b/Ccr2/Fn1/Met	5
C2	GO:0001667	ameboidal-type cell migration	8/98	427/23328	0.000441608	0.00321922	0.00199939	Thbs1/Nr4a1/Arhgdib/Jun/Iqgap1/Klf4/Prkx/Met	8
C2	GO:0006470	protein dephosphorylation	6/98	235/23328	0.000476819	0.00345627	0.00214661	Vcan/Dusp1/Ptprc/Pirb/Dusp2/Ppp2r5a	6
C2	GO:0002821	positive regulation of adaptive immune response	5/98	154/23328	0.000486942	0.0035092	0.00217948	Nfkbiz/Il1b/Ccr2/C3/Ptprc	5
C2	GO:0007204	positive regulation of cytosolic calcium ion concentration	7/98	330/23328	0.000489592	0.0035092	0.00217948	Il1b/Ccr2/Cxcl2/Coro1a/Ccl3/Ptprc/Cd52	7
C2	GO:0062197	cellular response to chemical stress	7/98	332/23328	0.000507486	0.00361724	0.00224659	Thbs1/Fos/Mcl1/Itgam/Jun/Gsr/Met	7
C2	GO:0032675	regulation of interleukin-6 production	5/98	156/23328	0.000516419	0.00366059	0.00227351	Il1b/Mmp8/Capn2/Il17ra/Met	5
C2	GO:0043254	regulation of protein-containing complex assembly	8/98	438/23328	0.000522149	0.00366075	0.00227361	Sorl1/Coro1a/Lgals3/Tmsb10/Gda/Add3/Asap1/Met	8
C2	GO:0050673	epithelial cell proliferation	8/98	438/23328	0.000522149	0.00366075	0.00227361	Thbs1/Nr4a1/Mki67/Zfp36/Hmgb2/Jun/Prkx/Xdh	8
C2	GO:0045860	positive regulation of protein kinase activity	8/98	440/23328	0.000537998	0.00375137	0.00232989	Thbs1/Il1b/Akap13/Egr1/Pim1/Ptprc/Iqgap1/Met	8
C2	GO:0042063	gliogenesis	7/98	338/23328	0.000564319	0.00391363	0.00243066	Vim/Il1b/Ccr2/Vcan/Fn1/Itgam/Ccl3	7
C2	GO:0070661	leukocyte proliferation	7/98	344/23328	0.000626112	0.00431882	0.00268232	Il1b/Ccr2/Coro1a/Lgals3/Itgam/Ptprc/Lilrb4a	7
C2	GO:0031330	negative regulation of cellular catabolic process	6/98	250/23328	0.000659813	0.00452695	0.00281159	Sorl1/Hp/Zfp36/Anxa2/Mcl1/Usp25	6
C2	GO:1905952	regulation of lipid localization	5/98	165/23328	0.00066599	0.00454503	0.00282281	Thbs1/Il1b/C3/Nfkbia/Anxa2	5
C2	GO:0032940	secretion by cell	12/98	959/23328	0.000684194	0.00464456	0.00288463	Il1b/Ccr2/Sorl1/Lyst/Coro1a/Lgals3/Itgam/Clec4e/Hcar2/Myo1f/Srgn/Myo1g	12
C2	GO:0032635	interleukin-6 production	5/98	167/23328	0.000703219	0.00474858	0.00294924	Il1b/Mmp8/Capn2/Il17ra/Met	5
C2	GO:1902533	positive regulation of intracellular signal transduction	12/98	967/23328	0.00073574	0.00494217	0.00306947	Thbs1/Il1b/Akap13/C3/Mcl1/Ccl3/Ptprc/Mmp8/Jun/Iqgap1/Xdh/Met	12
C2	GO:0035303	regulation of dephosphorylation	5/98	169/23328	0.000741985	0.00495816	0.0030794	Vcan/Ptprc/Iqgap1/Pirb/Ppp2r5a	5
C2	GO:0051403	stress-activated MAPK cascade	6/98	257/23328	0.000761914	0.00506495	0.00314573	Il1b/Zfp36/Dusp1/Mmp8/Xdh/Met	6
C2	GO:0042493	response to drug	6/98	260/23328	0.000809239	0.00535182	0.00332389	Fos/Il1b/Cybb/Lyst/Add3/Jun	6
C2	GO:0002250	adaptive immune response	9/98	587/23328	0.000820529	0.00539866	0.00335299	Nfkbiz/Il1b/Ccr2/Lyst/Ctsc/C3/Ptprc/Pirb/Myo1g	9
C2	GO:0042102	positive regulation of T cell proliferation	4/98	100/23328	0.000843403	0.00552085	0.00342887	Il1b/Ccr2/Coro1a/Ptprc	4
C2	GO:0019216	regulation of lipid metabolic process	7/98	363/23328	0.000858037	0.00558813	0.00347066	Il1b/Sorl1/C3/Egr1/Hcar2/Capn2/Ppp2r5a	7
C2	GO:0042129	regulation of T cell proliferation	5/98	175/23328	0.0008679	0.00562382	0.00349283	Il1b/Ccr2/Coro1a/Lgals3/Ptprc	5
C2	GO:2001237	negative regulation of extrinsic apoptotic signaling pathway	4/98	101/23328	0.000875379	0.00564378	0.00350522	Il1b/Lgals3/Mcl1/Hmgb2	4
C2	GO:0045582	positive regulation of T cell differentiation	4/98	102/23328	0.000908201	0.00582611	0.00361847	Nfkbiz/Il1b/Ccr2/Ptprc	4
C2	GO:0032496	response to lipopolysaccharide	7/98	368/23328	0.000929133	0.00593073	0.00368344	Vim/Il1b/Cxcl2/Zfp36/Nfkbia/Hmgb2/Lilrb4a	7
C2	GO:1905954	positive regulation of lipid localization	4/98	105/23328	0.00101186	0.00642545	0.0039907	Il1b/C3/Nfkbia/Anxa2	4
C2	GO:0016311	dephosphorylation	7/98	374/23328	0.0010205	0.00642545	0.0039907	Vcan/Dusp1/Ptprc/Iqgap1/Pirb/Dusp2/Ppp2r5a	7
C2	GO:0031098	stress-activated protein kinase signaling cascade	6/98	272/23328	0.00102166	0.00642545	0.0039907	Il1b/Zfp36/Dusp1/Mmp8/Xdh/Met	6
C2	GO:0051480	regulation of cytosolic calcium ion concentration	7/98	375/23328	0.00103639	0.00645298	0.0040078	Il1b/Ccr2/Cxcl2/Coro1a/Ccl3/Ptprc/Cd52	7
C2	GO:0002699	positive regulation of immune effector process	6/98	273/23328	0.00104113	0.00645298	0.0040078	Nfkbiz/Il1b/Ccr2/C3/Itgam/Ptprc	6
C2	GO:0110053	regulation of actin filament organization	6/98	273/23328	0.00104113	0.00645298	0.0040078	Coro1a/Tmsb10/Add3/S100a10/Actg1/Met	6
C2	GO:0014812	muscle cell migration	4/98	106/23328	0.00104819	0.00646552	0.00401559	Sorl1/Egr1/Iqgap1/Met	4
C2	GO:0110020	regulation of actomyosin structure organization	4/98	107/23328	0.00108542	0.00663361	0.00411998	Akap13/S100a10/Actg1/Met	4
C2	GO:2001235	positive regulation of apoptotic signaling pathway	5/98	184/23328	0.00108578	0.00663361	0.00411998	Thbs1/Atf3/Ctsc/Mcl1/Ptprc	5
C2	GO:0031329	regulation of cellular catabolic process	10/98	740/23328	0.00110225	0.00670233	0.00416266	Vim/Il1b/Sorl1/Hp/Ctsc/Btg2/Zfp36/Anxa2/Mcl1/Usp25	10
C2	GO:1903034	regulation of response to wounding	5/98	186/23328	0.00113925	0.00689462	0.00428209	Thbs1/Clec7a/Anxa2/Klf4/Actg1	5
C2	GO:0009894	regulation of catabolic process	11/98	884/23328	0.00120885	0.00728145	0.00452234	Vim/Il1b/Sorl1/Hp/Ctsc/Btg2/Zfp36/Anxa2/Mcl1/Hcar2/Usp25	11
C2	GO:0030217	T cell differentiation	6/98	282/23328	0.00122943	0.00737084	0.00457786	Nfkbiz/Il1b/Ccr2/Egr1/Ptprc/Clec4e	6
C2	GO:0030316	osteoclast differentiation	4/98	111/23328	0.00124367	0.00742152	0.00460933	Fos/Junb/Anxa2/Ccl3	4
C2	GO:0007346	regulation of mitotic cell cycle	8/98	502/23328	0.00125961	0.00748183	0.00464679	Il1b/Btg2/Mki67/Kif11/Iqgap1/Klf4/Top2a/Met	8
C2	GO:0002237	response to molecule of bacterial origin	7/98	389/23328	0.00128008	0.00756838	0.00470055	Vim/Il1b/Cxcl2/Zfp36/Nfkbia/Hmgb2/Lilrb4a	7
C2	GO:0071222	cellular response to lipopolysaccharide	6/98	285/23328	0.00129767	0.00763718	0.00474328	Vim/Il1b/Cxcl2/Zfp36/Nfkbia/Lilrb4a	6
C2	GO:0050764	regulation of phagocytosis	4/98	113/23328	0.00132855	0.00778323	0.00483399	Il1b/Clec7a/C3/Ptprc	4
C2	GO:0033674	positive regulation of kinase activity	8/98	511/23328	0.00140948	0.00821981	0.00510514	Thbs1/Il1b/Akap13/Egr1/Pim1/Ptprc/Iqgap1/Met	8
C2	GO:0007162	negative regulation of cell adhesion	6/98	290/23328	0.00141779	0.00823089	0.00511202	Thbs1/Lgals3/Dusp1/Ptprc/Myo1f/Klf4	6
C2	GO:0043491	protein kinase B signaling	5/98	196/23328	0.00143637	0.00830121	0.00515569	Thbs1/Il1b/Klf4/Xdh/Met	5
C2	GO:0098609	cell-cell adhesion	10/98	768/23328	0.00145434	0.00836738	0.00519679	Nfkbiz/Il1b/Ccr2/Emb/Fn1/Coro1a/Lgals3/Itgam/Ptprc/Klf4	10
C2	GO:0002822	regulation of adaptive immune response based on somatic recombination of immune receptors built from immunoglobulin superfamily domains	5/98	197/23328	0.00146895	0.00841365	0.00522552	Nfkbiz/Il1b/Ccr2/C3/Ptprc	5
C2	GO:0002286	T cell activation involved in immune response	4/98	117/23328	0.00151031	0.00853627	0.00530168	Nfkbiz/Ccr2/Lgals3/Clec4e	4
C2	GO:0045621	positive regulation of lymphocyte differentiation	4/98	117/23328	0.00151031	0.00853627	0.00530168	Nfkbiz/Il1b/Ccr2/Ptprc	4
C2	GO:0071901	negative regulation of protein serine/threonine kinase activity	4/98	117/23328	0.00151031	0.00853627	0.00530168	Il1b/Sorl1/Dusp1/Dusp2	4
C2	GO:0010631	epithelial cell migration	6/98	295/23328	0.00154623	0.00866297	0.00538037	Thbs1/Nr4a1/Jun/Klf4/Prkx/Met	6
C2	GO:0071219	cellular response to molecule of bacterial origin	6/98	295/23328	0.00154623	0.00866297	0.00538037	Vim/Il1b/Cxcl2/Zfp36/Nfkbia/Lilrb4a	6
C2	GO:0050870	positive regulation of T cell activation	5/98	200/23328	0.00156993	0.00875746	0.00543906	Nfkbiz/Il1b/Ccr2/Coro1a/Ptprc	5
C2	GO:0090132	epithelium migration	6/98	297/23328	0.00160002	0.00887981	0.00551505	Thbs1/Nr4a1/Jun/Klf4/Prkx/Met	6
C2	GO:0000187	activation of MAPK activity	4/98	119/23328	0.00160739	0.00887981	0.00551505	Thbs1/Il1b/Ptprc/Met	4
C2	GO:0006897	endocytosis	9/98	647/23328	0.00161262	0.00887981	0.00551505	Thbs1/Sorl1/Clec7a/Lgals3/C3/Anxa2/Itgam/Ifitm3/Actg1	9
C2	GO:0000302	response to reactive oxygen species	5/98	202/23328	0.00164003	0.00899212	0.0055848	Thbs1/Fos/Hp/Jun/Met	5
C2	GO:0090130	tissue migration	6/98	299/23328	0.00165523	0.00903684	0.00561257	Thbs1/Nr4a1/Jun/Klf4/Prkx/Met	6
C2	GO:0006469	negative regulation of protein kinase activity	5/98	207/23328	0.00182533	0.00992331	0.00616314	Il1b/Sorl1/Dusp1/Ptprc/Dusp2	5
C2	GO:0051251	positive regulation of lymphocyte activation	7/98	416/23328	0.00187532	0.010152	0.00630519	Nfkbiz/Il1b/Ccr2/Clec7a/Lyst/Coro1a/Ptprc	7
C2	GO:1903409	reactive oxygen species biosynthetic process	4/98	125/23328	0.00192458	0.0103749	0.00644364	Il1b/Cybb/Mmp8/Klf4	4
C2	GO:0007517	muscle organ development	7/98	420/23328	0.00197924	0.010548	0.00655115	Fos/Atf3/Btg2/Nr4a1/Egr1/Pim1/Met	7
C2	GO:0001889	liver development	4/98	126/23328	0.00198136	0.010548	0.00655115	Hp/Mki67/Jun/Met	4
C2	GO:2000181	negative regulation of blood vessel morphogenesis	4/98	126/23328	0.00198136	0.010548	0.00655115	Thbs1/Ccr2/Klf4/Xdh	4
C2	GO:0043542	endothelial cell migration	5/98	212/23328	0.00202555	0.0107388	0.0066696	Thbs1/Nr4a1/Klf4/Prkx/Met	5
C2	GO:0051101	regulation of DNA binding	4/98	127/23328	0.00203928	0.0107516	0.00667756	Hmgb2/Mmp8/Jun/Klf4	4
C2	GO:0050778	positive regulation of immune response	9/98	670/23328	0.00204473	0.0107516	0.00667756	Nfkbiz/Il1b/Ccr2/Lgals3/C3/Itgam/Hmgb2/Ptprc/Myo1g	9
C2	GO:0002819	regulation of adaptive immune response	5/98	213/23328	0.00206744	0.0107826	0.00669685	Nfkbiz/Il1b/Ccr2/C3/Ptprc	5
C2	GO:0051651	maintenance of location in cell	5/98	213/23328	0.00206744	0.0107826	0.00669685	Sorl1/Coro1a/Tmsb10/Ptprc/Srgn	5
C2	GO:0010811	positive regulation of cell-substrate adhesion	4/98	128/23328	0.00209837	0.0108996	0.0067695	Thbs1/Fn1/Iqgap1/S100a10	4
C2	GO:1901888	regulation of cell junction assembly	5/98	215/23328	0.00215313	0.0111225	0.00690796	Il1b/Iqgap1/Slk/S100a10/Actg1	5
C2	GO:0061008	hepaticobiliary system development	4/98	129/23328	0.00215862	0.0111225	0.00690796	Hp/Mki67/Jun/Met	4
C2	GO:0022407	regulation of cell-cell adhesion	7/98	427/23328	0.00217181	0.0111457	0.00692235	Nfkbiz/Il1b/Ccr2/Coro1a/Lgals3/Ptprc/Klf4	7
C2	GO:0070374	positive regulation of ERK1 and ERK2 cascade	5/98	216/23328	0.00219693	0.0112297	0.00697452	Il1b/C3/Ccl3/Ptprc/Jun	5
C2	GO:0032368	regulation of lipid transport	4/98	130/23328	0.00222006	0.011303	0.00702001	Thbs1/Il1b/Nfkbia/Anxa2	4
C2	GO:0031668	cellular response to extracellular stimulus	5/98	217/23328	0.00224138	0.0113664	0.00705938	Fos/Atf3/Pim1/Ptprc/Jun	5
C2	GO:0002761	regulation of myeloid leukocyte differentiation	4/98	131/23328	0.0022827	0.0115304	0.00716124	Fos/Itgam/Ccl3/Jun	4
C2	GO:0050863	regulation of T cell activation	6/98	321/23328	0.0023628	0.0118881	0.00738345	Nfkbiz/Il1b/Ccr2/Coro1a/Lgals3/Ptprc	6
C2	GO:1903039	positive regulation of leukocyte cell-cell adhesion	5/98	221/23328	0.00242575	0.0121572	0.00755055	Nfkbiz/Il1b/Ccr2/Coro1a/Ptprc	5
C2	GO:0002697	regulation of immune effector process	7/98	440/23328	0.00256765	0.0128183	0.00796115	Nfkbiz/Il1b/Ccr2/Lgals3/C3/Itgam/Ptprc	7
C2	GO:0050767	regulation of neurogenesis	11/98	977/23328	0.00265128	0.0131844	0.00818856	Vim/Il1b/Ccr2/Sorl1/Fn1/Hmgb2/Iqgap1/Asap1/Klf4/Met/Ifrd1	11
C2	GO:0034341	response to interferon-gamma	4/98	137/23328	0.00268432	0.0132972	0.00825862	Vim/Ccl3/Ifitm3/Actg1	4
C2	GO:0080135	regulation of cellular response to stress	9/98	699/23328	0.0027167	0.0133409	0.0082857	Il1b/Dusp1/Mcl1/Itgam/Mmp8/Klf4/Usp25/Xdh/Met	9
C2	GO:0032271	regulation of protein polymerization	5/98	227/23328	0.00272267	0.0133409	0.0082857	Coro1a/Tmsb10/Gda/Add3/Met	5
C2	GO:0033993	response to lipid	10/98	837/23328	0.00272432	0.0133409	0.0082857	Vim/Il1b/Cxcl2/Akap13/Zfp36/Nfkbia/Pim1/Hmgb2/Klf4/Lilrb4a	10
C2	GO:0050671	positive regulation of lymphocyte proliferation	4/98	138/23328	0.00275567	0.013443	0.00834917	Il1b/Ccr2/Coro1a/Ptprc	4
C2	GO:1901343	negative regulation of vasculature development	4/98	139/23328	0.0028283	0.0137451	0.00853677	Thbs1/Ccr2/Klf4/Xdh	4
C2	GO:0032946	positive regulation of mononuclear cell proliferation	4/98	140/23328	0.00290223	0.0140512	0.00872687	Il1b/Ccr2/Coro1a/Ptprc	4
C2	GO:0050670	regulation of lymphocyte proliferation	5/98	231/23328	0.00293473	0.0141551	0.00879141	Il1b/Ccr2/Coro1a/Lgals3/Ptprc	5
C2	GO:0032872	regulation of stress-activated MAPK cascade	5/98	232/23328	0.00298956	0.0143655	0.00892211	Il1b/Dusp1/Mmp8/Xdh/Met	5
C2	GO:0032944	regulation of mononuclear cell proliferation	5/98	234/23328	0.00310143	0.0148475	0.00922145	Il1b/Ccr2/Coro1a/Lgals3/Ptprc	5
C2	GO:0034762	regulation of transmembrane transport	8/98	582/23328	0.00315375	0.0149533	0.00928714	Thbs1/Ahnak/Il1b/Cybb/Coro1a/C3/Pim1/Met	8
C2	GO:0031334	positive regulation of protein-containing complex assembly	5/98	235/23328	0.00315848	0.0149533	0.00928714	Coro1a/Lgals3/Gda/Asap1/Met	5
C2	GO:0070302	regulation of stress-activated protein kinase signaling cascade	5/98	235/23328	0.00315848	0.0149533	0.00928714	Il1b/Dusp1/Mmp8/Xdh/Met	5
C2	GO:0051249	regulation of lymphocyte activation	8/98	583/23328	0.00318675	0.0150316	0.0093358	Nfkbiz/Il1b/Ccr2/Clec7a/Lyst/Coro1a/Lgals3/Ptprc	8
C2	GO:0033002	muscle cell proliferation	5/98	236/23328	0.0032163	0.0151154	0.00938784	Thbs1/Egr1/Pim1/Jun/Klf4	5
C2	GO:0061041	regulation of wound healing	4/98	146/23328	0.0033738	0.0157978	0.00981163	Thbs1/Clec7a/Anxa2/Actg1	4
C2	GO:0051607	defense response to virus	5/98	239/23328	0.00339431	0.015836	0.00983538	Il1b/Lyst/Ptprc/Samhd1/Ifitm3	5
C2	GO:0042742	defense response to bacterium	7/98	464/23328	0.00344228	0.0160016	0.00993824	Lyz2/Hp/Lyst/Hmgb2/Clec4e/Myo1f/Mpeg1	7
C2	GO:0006898	receptor-mediated endocytosis	5/98	240/23328	0.0034552	0.0160037	0.00993951	Sorl1/C3/Anxa2/Itgam/Ifitm3	5
C2	GO:0034614	cellular response to reactive oxygen species	4/98	150/23328	0.00371564	0.0171481	0.0106503	Thbs1/Fos/Jun/Met	4
C2	GO:0050830	defense response to Gram-positive bacterium	4/98	151/23328	0.00380463	0.0174958	0.0108663	Lyz2/Hmgb2/Myo1f/Mpeg1	4
C2	GO:0070665	positive regulation of leukocyte proliferation	4/98	152/23328	0.00389506	0.0178477	0.0110848	Il1b/Ccr2/Coro1a/Ptprc	4
C2	GO:0034330	cell junction organization	9/98	740/23328	0.00395415	0.018003	0.0111812	Il1b/Fn1/C3/Itgam/Iqgap1/Slk/Srgn/S100a10/Actg1	9
C2	GO:0006874	cellular calcium ion homeostasis	7/98	476/23328	0.00395701	0.018003	0.0111812	Il1b/Ccr2/Cxcl2/Coro1a/Ccl3/Ptprc/Cd52	7
C2	GO:0015850	organic hydroxy compound transport	5/98	249/23328	0.00403905	0.0183113	0.0113727	Emb/Lgals3/Nfkbia/Anxa2/Soat1	5
C2	GO:0070663	regulation of leukocyte proliferation	5/98	251/23328	0.00417782	0.0188737	0.011722	Il1b/Ccr2/Coro1a/Lgals3/Ptprc	5
C2	GO:0002687	positive regulation of leukocyte migration	4/98	156/23328	0.00427135	0.0191613	0.0119007	Thbs1/Il1b/Ccr2/Lgals3	4
C2	GO:0030856	regulation of epithelial cell differentiation	4/98	156/23328	0.00427135	0.0191613	0.0119007	Il1b/Zfp36/Prkx/Xdh	4
C2	GO:0051961	negative regulation of nervous system development	6/98	365/23328	0.00443459	0.0197601	0.0122725	Vim/Il1b/Sorl1/Ctsc/Asap1/Ifrd1	6
C2	GO:0010638	positive regulation of organelle organization	8/98	616/23328	0.00443562	0.0197601	0.0122725	Il1b/Coro1a/Gda/Anxa2/Slk/Asap1/S100a10/Met	8
C2	GO:0050777	negative regulation of immune response	4/98	158/23328	0.00446839	0.0198372	0.0123204	Ccr2/Lgals3/Ptprc/Samhd1	4
C2	GO:0030855	epithelial cell differentiation	8/98	619/23328	0.00456556	0.0201452	0.0125117	Vim/Il1b/Zfp36/Jun/Klf4/Prkx/Xdh/Met	8
C2	GO:0045580	regulation of T cell differentiation	4/98	159/23328	0.00456917	0.0201452	0.0125117	Nfkbiz/Il1b/Ccr2/Ptprc	4
C2	GO:0007178	transmembrane receptor protein serine/threonine kinase signaling pathway	6/98	368/23328	0.00461304	0.020269	0.0125886	Thbs1/Fos/Vim/Sorl1/Egr1/Jun	6
C2	GO:0071396	cellular response to lipid	8/98	621/23328	0.00465381	0.0203783	0.0126565	Vim/Il1b/Cxcl2/Akap13/Zfp36/Nfkbia/Pim1/Lilrb4a	8
C2	GO:0007088	regulation of mitotic nuclear division	4/98	160/23328	0.00467147	0.0203861	0.0126613	Il1b/Mki67/Kif11/Met	4
C2	GO:0055074	calcium ion homeostasis	7/98	493/23328	0.00478399	0.0208063	0.0129223	Il1b/Ccr2/Cxcl2/Coro1a/Ccl3/Ptprc/Cd52	7
C2	GO:0050678	regulation of epithelial cell proliferation	6/98	372/23328	0.00485917	0.0210619	0.013081	Thbs1/Nr4a1/Zfp36/Hmgb2/Jun/Xdh	6
C2	GO:0002703	regulation of leukocyte mediated immunity	5/98	261/23328	0.00492322	0.0212676	0.0132088	Il1b/Ccr2/C3/Itgam/Ptprc	5
C2	GO:0044403	symbiotic process	6/98	374/23328	0.0049858	0.0214017	0.0132921	Fn1/Zfp36/Anxa2/Jun/Ifitm3/Top2a	6
C2	GO:1902904	negative regulation of supramolecular fiber organization	4/98	163/23328	0.00498761	0.0214017	0.0132921	Coro1a/Tmsb10/Add3/Met	4
C2	GO:0048660	regulation of smooth muscle cell proliferation	4/98	165/23328	0.00520617	0.0222651	0.0138283	Thbs1/Egr1/Jun/Klf4	4
C2	GO:0022409	positive regulation of cell-cell adhesion	5/98	265/23328	0.00524628	0.022362	0.0138886	Nfkbiz/Il1b/Ccr2/Coro1a/Ptprc	5
C2	GO:0046631	alpha-beta T cell activation	4/98	166/23328	0.00531782	0.0224859	0.0139655	Nfkbiz/Ccr2/Ptprc/Lilrb4a	4
C2	GO:0051896	regulation of protein kinase B signaling	4/98	166/23328	0.00531782	0.0224859	0.0139655	Thbs1/Klf4/Xdh/Met	4
C2	GO:0072503	cellular divalent inorganic cation homeostasis	7/98	503/23328	0.00532791	0.0224859	0.0139655	Il1b/Ccr2/Cxcl2/Coro1a/Ccl3/Ptprc/Cd52	7
C2	GO:0007167	enzyme linked receptor protein signaling pathway	10/98	928/23328	0.00562127	0.0236462	0.0146861	Thbs1/Fos/Vim/Il1b/Sorl1/Egr1/Jun/Iqgap1/Xdh/Met	10
C2	GO:0032874	positive regulation of stress-activated MAPK cascade	4/98	169/23328	0.00566236	0.0236639	0.0146971	Il1b/Mmp8/Xdh/Met	4
C2	GO:0051017	actin filament bundle assembly	4/98	169/23328	0.00566236	0.0236639	0.0146971	Add3/S100a10/Actg1/Met	4
C2	GO:0048659	smooth muscle cell proliferation	4/98	170/23328	0.00578045	0.0240789	0.0149549	Thbs1/Egr1/Jun/Klf4	4
C2	GO:0051494	negative regulation of cytoskeleton organization	4/98	171/23328	0.00590016	0.0244191	0.0151661	Coro1a/Tmsb10/Add3/Met	4
C2	GO:0070304	positive regulation of stress-activated protein kinase signaling cascade	4/98	171/23328	0.00590016	0.0244191	0.0151661	Il1b/Mmp8/Xdh/Met	4
C2	GO:1903532	positive regulation of secretion by cell	6/98	388/23328	0.00594131	0.0245103	0.0152228	Il1b/Sorl1/Lgals3/Itgam/Clec4e/Hcar2	6
C2	GO:0061572	actin filament bundle organization	4/98	172/23328	0.00602152	0.0247616	0.0153788	Add3/S100a10/Actg1/Met	4
C2	GO:0016050	vesicle organization	5/98	275/23328	0.00611927	0.0250831	0.0155786	Lyst/Coro1a/Anxa2/Srgn/S100a10	5
C2	GO:0044270	cellular nitrogen compound catabolic process	6/98	391/23328	0.00616234	0.0251792	0.0156382	Vim/Gda/Btg2/Zfp36/Samhd1/Xdh	6
C2	GO:0007369	gastrulation	4/98	176/23328	0.00652358	0.0264866	0.0164502	Fn1/Dusp1/Klf4/Dusp2	4
C2	GO:0009612	response to mechanical stimulus	4/98	176/23328	0.00652358	0.0264866	0.0164502	Thbs1/Fos/Nfkbia/Jun	4
C2	GO:0071496	cellular response to external stimulus	5/98	280/23328	0.00659207	0.0266802	0.0165705	Fos/Atf3/Pim1/Ptprc/Jun	5
C2	GO:0046700	heterocycle catabolic process	6/98	397/23328	0.00662233	0.0267184	0.0165942	Vim/Gda/Btg2/Zfp36/Samhd1/Xdh	6
C2	GO:0045596	negative regulation of cell differentiation	9/98	806/23328	0.00683255	0.0274801	0.0170673	Vim/Il1b/Sorl1/Zfp36/Nfkbia/Asap1/Xdh/Klf13/Ifrd1	9
C2	GO:1901652	response to peptide	6/98	400/23328	0.00686148	0.0275102	0.017086	Vim/Il1b/Sorl1/Nr4a1/Nfkbia/Egr1	6
C2	GO:0072507	divalent inorganic cation homeostasis	7/98	528/23328	0.00689097	0.0275424	0.017106	Il1b/Ccr2/Cxcl2/Coro1a/Ccl3/Ptprc/Cd52	7
C2	GO:0009615	response to virus	5/98	286/23328	0.00719262	0.0286588	0.0177993	Il1b/Lyst/Ptprc/Samhd1/Ifitm3	5
C2	GO:0010951	negative regulation of endopeptidase activity	4/98	182/23328	0.0073276	0.0291062	0.0180772	Thbs1/Sorl1/Nr4a1/Klf4	4
C2	GO:0006959	humoral immune response	6/98	406/23328	0.00735852	0.0291388	0.0180975	Il1b/Ccr2/Cxcl2/Lgals3/C3/Ptprc	6
C2	GO:0022604	regulation of cell morphogenesis	7/98	538/23328	0.00760347	0.0298841	0.0185603	Vim/Fn1/Coro1a/Ccl3/S100a10/Met/Ifrd1	7
C2	GO:0046890	regulation of lipid biosynthetic process	4/98	184/23328	0.00760948	0.0298841	0.0185603	Il1b/C3/Egr1/Capn2	4
C2	GO:0030098	lymphocyte differentiation	6/98	409/23328	0.0076166	0.0298841	0.0185603	Nfkbiz/Il1b/Ccr2/Egr1/Ptprc/Clec4e	6
C2	GO:0002705	positive regulation of leukocyte mediated immunity	4/98	185/23328	0.00775306	0.0303268	0.0188353	Il1b/C3/Itgam/Ptprc	4
C2	GO:0019439	aromatic compound catabolic process	6/98	411/23328	0.00779225	0.0303874	0.0188729	Vim/Gda/Btg2/Zfp36/Samhd1/Xdh	6
C2	GO:0051258	protein polymerization	5/98	293/23328	0.00794046	0.0308715	0.0191736	Coro1a/Tmsb10/Gda/Add3/Met	5
C2	GO:0010876	lipid localization	6/98	413/23328	0.00797081	0.0308959	0.0191887	Thbs1/Il1b/C3/Nfkbia/Anxa2/Soat1	6
C2	GO:0051604	protein maturation	5/98	294/23328	0.00805154	0.0311149	0.0193247	Thbs1/Sorl1/Hp/Srgn/Capn2	5
C2	GO:0002253	activation of immune response	6/98	416/23328	0.00824416	0.0317635	0.0197276	Nfkbiz/Il1b/Lgals3/C3/Ptprc/Myo1g	6
C2	GO:0044089	positive regulation of cellular component biogenesis	7/98	550/23328	0.00852901	0.0327627	0.0203481	Coro1a/Lgals3/Gda/Iqgap1/Asap1/S100a10/Met	7
C2	GO:0007611	learning or memory	5/98	299/23328	0.00862322	0.0328791	0.0204205	Il1b/Btg2/Egr1/Jun/Pirb	5
C2	GO:0051783	regulation of nuclear division	4/98	191/23328	0.00865213	0.0328791	0.0204205	Il1b/Mki67/Kif11/Met	4
C2	GO:1901699	cellular response to nitrogen compound	8/98	691/23328	0.00865991	0.0328791	0.0204205	Thbs1/Vim/Il1b/Sorl1/Ly6c2/Nr4a1/Egr1/Capn2	8
C2	GO:1902882	regulation of response to oxidative stress	3/98	100/23328	0.00866184	0.0328791	0.0204205	Mcl1/Itgam/Met	3
C2	GO:0045619	regulation of lymphocyte differentiation	4/98	192/23328	0.00880832	0.0333365	0.0207045	Nfkbiz/Il1b/Ccr2/Ptprc	4
C2	GO:0032755	positive regulation of interleukin-6 production	3/98	101/23328	0.0089002	0.0335852	0.020859	Il1b/Mmp8/Il17ra	3
C2	GO:0001704	formation of primary germ layer	3/98	102/23328	0.00914238	0.0343979	0.0213637	Fn1/Dusp1/Dusp2	3
C2	GO:0034329	cell junction assembly	6/98	426/23328	0.00920422	0.0345293	0.0214453	Il1b/Fn1/Iqgap1/Slk/S100a10/Actg1	6
C2	GO:0072676	lymphocyte migration	3/98	103/23328	0.0093884	0.0351175	0.0218107	Ccr2/Ccl3/Myo1g	3
C2	GO:0002706	regulation of lymphocyte mediated immunity	4/98	196/23328	0.00945149	0.0352508	0.0218934	Il1b/Ccr2/C3/Ptprc	4
C2	GO:0048525	negative regulation of viral process	3/98	104/23328	0.00963826	0.0358431	0.0222614	Zfp36/Jun/Ifitm3	3
C2	GO:0046634	regulation of alpha-beta T cell activation	3/98	105/23328	0.00989198	0.0366804	0.0227813	Nfkbiz/Ccr2/Ptprc	3
C2	GO:1902905	positive regulation of supramolecular fiber organization	4/98	200/23328	0.0101245	0.0374192	0.0232402	Coro1a/Gda/S100a10/Met	4
C2	GO:0035710	CD4-positive, alpha-beta T cell activation	3/98	106/23328	0.0101496	0.0374192	0.0232402	Nfkbiz/Ccr2/Lilrb4a	3
C2	GO:0050792	regulation of viral process	4/98	201/23328	0.0102975	0.037856	0.0235115	Zfp36/Jun/Ifitm3/Top2a	4
C2	GO:0048145	regulation of fibroblast proliferation	3/98	107/23328	0.010411	0.0380551	0.0236352	Fn1/Anxa2/Jun	3
C2	GO:1903426	regulation of reactive oxygen species biosynthetic process	3/98	107/23328	0.010411	0.0380551	0.0236352	Il1b/Mmp8/Klf4	3
C2	GO:0045446	endothelial cell differentiation	3/98	108/23328	0.0106764	0.0387057	0.0240392	Il1b/Xdh/Met	3
C2	GO:0048661	positive regulation of smooth muscle cell proliferation	3/98	108/23328	0.0106764	0.0387057	0.0240392	Thbs1/Egr1/Jun	3
C2	GO:0051047	positive regulation of secretion	6/98	440/23328	0.0106795	0.0387057	0.0240392	Il1b/Sorl1/Lgals3/Itgam/Clec4e/Hcar2	6
C2	GO:1901361	organic cyclic compound catabolic process	6/98	442/23328	0.0109032	0.0394052	0.0244736	Vim/Gda/Btg2/Zfp36/Samhd1/Xdh	6
C2	GO:0048144	fibroblast proliferation	3/98	109/23328	0.0109456	0.0394473	0.0244999	Fn1/Anxa2/Jun	3
C2	GO:0032231	regulation of actin filament bundle assembly	3/98	110/23328	0.0112188	0.0402059	0.024971	S100a10/Actg1/Met	3
C2	GO:0032612	interleukin-1 production	3/98	110/23328	0.0112188	0.0402059	0.024971	Il1b/Egr1/Ccl3	3
C2	GO:1903530	regulation of secretion by cell	8/98	725/23328	0.0113525	0.0405421	0.0251798	Il1b/Ccr2/Sorl1/Lgals3/Itgam/Clec4e/Hcar2/Srgn	8
C2	GO:0031032	actomyosin structure organization	4/98	207/23328	0.0113758	0.0405421	0.0251798	Akap13/S100a10/Actg1/Met	4
C2	GO:0032963	collagen metabolic process	3/98	111/23328	0.0114959	0.0407437	0.025305	Vim/Fn1/Mmp8	3
C2	GO:1904659	glucose transmembrane transport	3/98	111/23328	0.0114959	0.0407437	0.025305	Il1b/C3/Met	3
C2	GO:0030162	regulation of proteolysis	8/98	727/23328	0.0115282	0.0407456	0.0253061	Thbs1/Il1b/Sorl1/Ctsc/Nr4a1/Klf4/Usp25/Xdh	8
C2	GO:0043281	regulation of cysteine-type endopeptidase activity involved in apoptotic process	4/98	209/23328	0.0117508	0.0411711	0.0255704	Thbs1/Nr4a1/Klf4/Xdh	4
C2	GO:0008645	hexose transmembrane transport	3/98	112/23328	0.0117769	0.0411711	0.0255704	Il1b/C3/Met	3
C2	GO:0030038	contractile actin filament bundle assembly	3/98	112/23328	0.0117769	0.0411711	0.0255704	S100a10/Actg1/Met	3
C2	GO:0043149	stress fiber assembly	3/98	112/23328	0.0117769	0.0411711	0.0255704	S100a10/Actg1/Met	3
C2	GO:0015749	monosaccharide transmembrane transport	3/98	114/23328	0.0123508	0.0429432	0.026671	Il1b/C3/Met	3
C2	GO:0071346	cellular response to interferon-gamma	3/98	114/23328	0.0123508	0.0429432	0.026671	Vim/Ccl3/Actg1	3
C2	GO:0034219	carbohydrate transmembrane transport	3/98	115/23328	0.0126436	0.0438426	0.0272297	Il1b/C3/Met	3
C2	GO:0007610	behavior	8/98	741/23328	0.0128151	0.0443176	0.0275246	Thbs1/Il1b/Btg2/Egr1/Jun/Pirb/Capn2/Met	8
C2	GO:0006875	cellular metal ion homeostasis	7/98	596/23328	0.0128586	0.0443482	0.0275437	Il1b/Ccr2/Cxcl2/Coro1a/Ccl3/Ptprc/Cd52	7
C2	GO:0043903	regulation of interspecies interactions between organisms	4/98	218/23328	0.0135363	0.0464693	0.0288611	Zfp36/Jun/Ifitm3/Top2a	4
C2	GO:0021782	glial cell development	3/98	118/23328	0.013546	0.0464693	0.0288611	Vim/Il1b/Itgam	3
C2	GO:0050890	cognition	5/98	336/23328	0.0137512	0.0470475	0.0292201	Il1b/Btg2/Egr1/Jun/Pirb	5
C2	GO:0043534	blood vessel endothelial cell migration	3/98	119/23328	0.0138548	0.0471503	0.029284	Thbs1/Nr4a1/Klf4	3
C2	GO:0060759	regulation of response to cytokine stimulus	3/98	119/23328	0.0138548	0.0471503	0.029284	Ptprc/Samhd1/Klf4	3
C2	GO:0050768	negative regulation of neurogenesis	5/98	337/23328	0.013913	0.0472234	0.0293294	Vim/Il1b/Sorl1/Asap1/Ifrd1	5
C2	GO:0032680	regulation of tumor necrosis factor production	3/98	120/23328	0.0141675	0.0479602	0.029787	Zfp36/Ccl3/Ptprc	3
C2	GO:0060348	bone development	4/98	222/23328	0.0143823	0.0484714	0.0301045	Thbs1/Akap13/Anxa2/Ptprc	4
C2	GO:0009306	protein secretion	6/98	470/23328	0.0143941	0.0484714	0.0301045	Il1b/Sorl1/Lyst/Clec4e/Hcar2/Srgn	6
C2	GO:0050829	defense response to Gram-negative bacterium	3/98	121/23328	0.0144843	0.0486474	0.0302138	Lyz2/Hmgb2/Mpeg1	3
C2	GO:0035592	establishment of protein localization to extracellular region	6/98	471/23328	0.0145316	0.048679	0.0302334	Il1b/Sorl1/Lyst/Clec4e/Hcar2/Srgn	6
C2	GO:0002768	immune response-regulating cell surface receptor signaling pathway	5/98	342/23328	0.0147415	0.0490823	0.0304839	Nfkbiz/Lgals3/Ptprc/Clec4e/Myo1g	5
C2	GO:0003158	endothelium development	3/98	122/23328	0.014805	0.0490823	0.0304839	Il1b/Xdh/Met	3
C2	GO:0016525	negative regulation of angiogenesis	3/98	122/23328	0.014805	0.0490823	0.0304839	Thbs1/Ccr2/Klf4	3
C2	GO:1903555	regulation of tumor necrosis factor superfamily cytokine production	3/98	122/23328	0.014805	0.0490823	0.0304839	Zfp36/Ccl3/Ptprc	3
C2	GO:0051495	positive regulation of cytoskeleton organization	4/98	225/23328	0.0150384	0.0497275	0.0308846	Coro1a/Gda/S100a10/Met	4
C2	GO:0002040	sprouting angiogenesis	3/98	123/23328	0.0151298	0.0499011	0.0309924	Thbs1/Nr4a1/Klf4	3
C7	GO:0006954	inflammatory response	19/98	729/23328	1.18e-10	1.43e-07	9.2e-08	Cd5l/Lpl/Igf1/Hmox1/Lipa/Cdh5/C1qa/Grn/Csf1r/Ptgs1/Tgm2/Pld3/Sirpa/Il1a/Aif1/Appl2/Cd81/Nr1h3/Apoe	19
C7	GO:0030334	regulation of cell migration	18/98	936/23328	4.41e-08	2.68e-05	1.72e-05	Igf1/Hmox1/Sdc3/Cdh5/Sema6d/Grn/Csf1r/Tmsb4x/Lgmn/Glul/Atp8a1/Hbegf/Il1a/Aif1/Appl2/Cd81/Sash1/Apoe	18
C7	GO:2000145	regulation of cell motility	18/98	986/23328	9.64e-08	3.91e-05	2.51e-05	Igf1/Hmox1/Sdc3/Cdh5/Sema6d/Grn/Csf1r/Tmsb4x/Lgmn/Glul/Atp8a1/Hbegf/Il1a/Aif1/Appl2/Cd81/Sash1/Apoe	18
C7	GO:0032101	regulation of response to external stimulus	17/98	919/23328	1.91e-07	5.81e-05	3.73e-05	Lpl/Igf1/Cdh5/Sema6d/Grn/Csf1r/Lamp1/Tgm2/Pld3/Sirpa/Lgmn/Aif1/Appl2/Cd81/Nr1h3/Sash1/Apoe	17
C7	GO:1905954	positive regulation of lipid localization	7/98	105/23328	2.62e-07	6.39e-05	4.09e-05	Lpl/Abca1/Atp8a1/Il1a/Abcb4/Nr1h3/Apoe	7
C7	GO:0050727	regulation of inflammatory response	11/98	372/23328	3.84e-07	7.8e-05	5e-05	Lpl/Igf1/Cdh5/Grn/Tgm2/Pld3/Sirpa/Appl2/Cd81/Nr1h3/Apoe	11
C7	GO:0030335	positive regulation of cell migration	13/98	564/23328	5.42e-07	9.43e-05	6.04e-05	Igf1/Hmox1/Cdh5/Sema6d/Grn/Csf1r/Tmsb4x/Lgmn/Atp8a1/Hbegf/Il1a/Aif1/Sash1	13
C7	GO:2000147	positive regulation of cell motility	13/98	587/23328	8.49e-07	0.000129093	8.27e-05	Igf1/Hmox1/Cdh5/Sema6d/Grn/Csf1r/Tmsb4x/Lgmn/Atp8a1/Hbegf/Il1a/Aif1/Sash1	13
C7	GO:0010876	lipid localization	11/98	413/23328	1.07e-06	0.000138839	8.9e-05	Lpl/Abca1/Abcc3/Psap/Hexa/Atp8a1/Il1a/Abcb4/Pitpnc1/Nr1h3/Apoe	11
C7	GO:0040017	positive regulation of locomotion	13/98	603/23328	1.14e-06	0.000138839	8.9e-05	Igf1/Hmox1/Cdh5/Sema6d/Grn/Csf1r/Tmsb4x/Lgmn/Atp8a1/Hbegf/Il1a/Aif1/Sash1	13
C7	GO:0051272	positive regulation of cellular component movement	13/98	608/23328	1.25e-06	0.000138839	8.9e-05	Igf1/Hmox1/Cdh5/Sema6d/Grn/Csf1r/Tmsb4x/Lgmn/Atp8a1/Hbegf/Il1a/Aif1/Sash1	13
C7	GO:0001667	ameboidal-type cell migration	11/98	427/23328	1.48e-06	0.000150546	9.65e-05	Igf1/Hmox1/Cdh5/Sema6d/Grn/Lgmn/Glul/Hbegf/Appl2/Sash1/Apoe	11
C7	GO:0050865	regulation of cell activation	14/98	737/23328	1.9e-06	0.000173486	0.000111191	Vcam1/Igf1/Hmox1/Grn/Cd86/Lamp1/Bank1/Sirpa/Mertk/Il1a/Aif1/Cd81/Nr1h3/Apoe	14
C7	GO:0034330	cell junction organization	14/98	740/23328	2e-06	0.000173486	0.000111191	C1qb/C1qc/Cdh5/Actb/Myo9a/C1qa/Dmpk/Dst/Epb41l3/Csf1r/Actn1/Lgmn/Pkp4/Apoe	14
C7	GO:0006897	endocytosis	13/98	647/23328	2.49e-06	0.000202042	0.000129493	Marco/Actb/Abca1/Grn/Mrc1/Sirpa/Aif1/Appl2/Clcn5/Cd81/Nr1h3/Hip1/Apoe	13
C7	GO:0043542	endothelial cell migration	8/98	212/23328	2.72e-06	0.000207179	0.000132785	Igf1/Hmox1/Cdh5/Grn/Lgmn/Glul/Sash1/Apoe	8
C7	GO:0070665	positive regulation of leukocyte proliferation	7/98	152/23328	3.19e-06	0.000222041	0.00014231	Vcam1/Igf1/Csf1r/Cd86/Il1a/Aif1/Cd81	7
C7	GO:0042102	positive regulation of T cell proliferation	6/98	100/23328	3.62e-06	0.000222041	0.00014231	Vcam1/Igf1/Cd86/Il1a/Aif1/Cd81	6
C7	GO:0010631	epithelial cell migration	9/98	295/23328	3.63e-06	0.000222041	0.00014231	Igf1/Hmox1/Cdh5/Grn/Lgmn/Glul/Hbegf/Sash1/Apoe	9
C7	GO:0050728	negative regulation of inflammatory response	7/98	156/23328	3.78e-06	0.000222041	0.00014231	Igf1/Cdh5/Grn/Sirpa/Appl2/Nr1h3/Apoe	7
C7	GO:0090132	epithelium migration	9/98	297/23328	3.83e-06	0.000222041	0.00014231	Igf1/Hmox1/Cdh5/Grn/Lgmn/Glul/Hbegf/Sash1/Apoe	9
C7	GO:0090130	tissue migration	9/98	299/23328	4.05e-06	0.000223819	0.00014345	Igf1/Hmox1/Cdh5/Grn/Lgmn/Glul/Hbegf/Sash1/Apoe	9
C7	GO:0002694	regulation of leukocyte activation	13/98	692/23328	5.17e-06	0.000257632	0.000165122	Vcam1/Igf1/Hmox1/Grn/Cd86/Lamp1/Bank1/Sirpa/Mertk/Il1a/Aif1/Cd81/Nr1h3	13
C7	GO:1905952	regulation of lipid localization	7/98	165/23328	5.48e-06	0.000257632	0.000165122	Lpl/Abca1/Atp8a1/Il1a/Abcb4/Nr1h3/Apoe	7
C7	GO:0010594	regulation of endothelial cell migration	7/98	166/23328	5.7e-06	0.000257632	0.000165122	Igf1/Hmox1/Grn/Lgmn/Glul/Sash1/Apoe	7
C7	GO:0008285	negative regulation of cell population proliferation	13/98	699/23328	5.77e-06	0.000257632	0.000165122	Igf1/Hmox1/Cdh5/Fth1/Csf1r/Cd86/Ctsl/Il1a/Ifi30/Aif1/Appl2/Hpgds/Apoe	13
C7	GO:0010632	regulation of epithelial cell migration	8/98	235/23328	5.82e-06	0.000257632	0.000165122	Igf1/Hmox1/Grn/Lgmn/Glul/Hbegf/Sash1/Apoe	8
C7	GO:0031347	regulation of defense response	12/98	594/23328	5.93e-06	0.000257632	0.000165122	Lpl/Igf1/Cdh5/Grn/Lamp1/Tgm2/Pld3/Sirpa/Appl2/Cd81/Nr1h3/Apoe	12
C7	GO:0030036	actin cytoskeleton organization	13/98	705/23328	6.32e-06	0.000265265	0.000170014	Actb/Epb41l3/Marcks/Csf1r/Actn1/Sirpa/Tmsb4x/Fmnl2/Csrp1/Ctsl/Il1a/Aif1/Hip1	13
C7	GO:0015850	organic hydroxy compound transport	8/98	249/23328	8.89e-06	0.000360627	0.000231133	Actb/Abca1/Entpd1/Abcc3/Ptgs1/Abcb4/Nr1h3/Apoe	8
C7	GO:0045087	innate immune response	14/98	879/23328	1.42e-05	0.000558581	0.000358006	Fcna/Marco/C1qb/C1qc/C1qa/Cfp/Grn/Mrc1/Csf1r/Lamp1/Pld3/Sirpa/Appl2/Apoe	14
C7	GO:0032368	regulation of lipid transport	6/98	130/23328	1.64e-05	0.000623781	0.000399794	Abca1/Atp8a1/Il1a/Abcb4/Nr1h3/Apoe	6
C7	GO:0050870	positive regulation of T cell activation	7/98	200/23328	1.92e-05	0.000687234	0.000440462	Vcam1/Igf1/Cd86/Sirpa/Il1a/Aif1/Cd81	7
C7	GO:0006869	lipid transport	9/98	364/23328	1.95e-05	0.000687234	0.000440462	Abca1/Abcc3/Psap/Atp8a1/Il1a/Abcb4/Pitpnc1/Nr1h3/Apoe	9
C7	GO:0001816	cytokine production	13/98	785/23328	1.98e-05	0.000687234	0.000440462	Lpl/Igf1/Hmox1/Lipa/Abca1/Pld3/Bank1/Sirpa/Mertk/Il1a/Aif1/Appl2/Cd81	13
C7	GO:0030029	actin filament-based process	13/98	793/23328	2.2e-05	0.00074281	0.000476082	Actb/Epb41l3/Marcks/Csf1r/Actn1/Sirpa/Tmsb4x/Fmnl2/Csrp1/Ctsl/Il1a/Aif1/Hip1	13
C7	GO:0050671	positive regulation of lymphocyte proliferation	6/98	138/23328	2.3e-05	0.00075408	0.000483305	Vcam1/Igf1/Cd86/Il1a/Aif1/Cd81	6
C7	GO:0071222	cellular response to lipopolysaccharide	8/98	285/23328	2.35e-05	0.00075408	0.000483305	Abca1/Mrc1/Cd86/Sirpa/Il1a/Fcgr4/Nr1h3/Sash1	8
C7	GO:0032946	positive regulation of mononuclear cell proliferation	6/98	140/23328	2.5e-05	0.000779079	0.000499327	Vcam1/Igf1/Cd86/Il1a/Aif1/Cd81	6
C7	GO:0050866	negative regulation of cell activation	7/98	210/23328	2.62e-05	0.000798029	0.000511473	Hmox1/Grn/Cd86/Bank1/Mertk/Nr1h3/Apoe	7
C7	GO:0032102	negative regulation of response to external stimulus	9/98	384/23328	2.97e-05	0.00087233	0.000559094	Igf1/Cdh5/Sema6d/Grn/Sirpa/Aif1/Appl2/Nr1h3/Apoe	9
C7	GO:0071219	cellular response to molecule of bacterial origin	8/98	295/23328	3.01e-05	0.00087233	0.000559094	Abca1/Mrc1/Cd86/Sirpa/Il1a/Fcgr4/Nr1h3/Sash1	8
C7	GO:1903039	positive regulation of leukocyte cell-cell adhesion	7/98	221/23328	3.63e-05	0.00101821	0.000652591	Vcam1/Igf1/Cd86/Sirpa/Il1a/Aif1/Cd81	7
C7	GO:0010634	positive regulation of epithelial cell migration	6/98	150/23328	3.68e-05	0.00101821	0.000652591	Igf1/Hmox1/Grn/Lgmn/Hbegf/Sash1	6
C7	GO:0050776	regulation of immune response	13/98	845/23328	4.24e-05	0.00114621	0.000734632	Cd5l/Fcna/C1qb/C1qc/Hmox1/C1qa/Cfp/Grn/Lamp1/Appl2/Cd81/Fcgr4/Apoe	13
C7	GO:0031348	negative regulation of defense response	7/98	228/23328	4.43e-05	0.00117162	0.000750916	Igf1/Cdh5/Grn/Sirpa/Appl2/Nr1h3/Apoe	7
C7	GO:0071396	cellular response to lipid	11/98	621/23328	4.95e-05	0.00128221	0.000821796	Lpl/Igf1/Abca1/Mrc1/Cd86/Sirpa/Il1a/Abcb4/Fcgr4/Nr1h3/Sash1	11
C7	GO:0042110	T cell activation	10/98	514/23328	5.12e-05	0.00129759	0.000831655	Vcam1/Igf1/Mafb/Cd86/Psap/Sirpa/Ctsl/Il1a/Aif1/Cd81	10
C7	GO:0071216	cellular response to biotic stimulus	8/98	320/23328	5.35e-05	0.00132813	0.000851224	Abca1/Mrc1/Cd86/Sirpa/Il1a/Fcgr4/Nr1h3/Sash1	8
C7	GO:0008284	positive regulation of cell population proliferation	14/98	996/23328	5.59e-05	0.00135142	0.000866151	Vcam1/Igf1/Hmox1/Grn/Csf1r/Cd86/Tgm2/Ctsz/Lgmn/Glul/Hbegf/Il1a/Aif1/Cd81	14
C7	GO:0032103	positive regulation of response to external stimulus	9/98	418/23328	5.73e-05	0.00135142	0.000866151	Lpl/Grn/Csf1r/Lamp1/Tgm2/Lgmn/Aif1/Cd81/Sash1	9
C7	GO:0046649	lymphocyte activation	13/98	871/23328	5.77e-05	0.00135142	0.000866151	Vcam1/Igf1/Mafb/Cd86/Lamp1/Psap/Bank1/Sirpa/Mertk/Ctsl/Il1a/Aif1/Cd81	13
C7	GO:0045834	positive regulation of lipid metabolic process	6/98	167/23328	6.7e-05	0.00149665	0.000959233	Igf1/Sh3glb1/Il1a/Cd81/Nr1h3/Apoe	6
C7	GO:0010595	positive regulation of endothelial cell migration	5/98	103/23328	6.76e-05	0.00149665	0.000959233	Igf1/Hmox1/Grn/Lgmn/Sash1	5
C7	GO:0015748	organophosphate ester transport	5/98	103/23328	6.76e-05	0.00149665	0.000959233	Abca1/Atp8a1/Abcb4/Pitpnc1/Apoe	5
C7	GO:0070663	regulation of leukocyte proliferation	7/98	251/23328	8.11e-05	0.001762	0.0011293	Vcam1/Igf1/Csf1r/Cd86/Il1a/Aif1/Cd81	7
C7	GO:0007033	vacuole organization	6/98	174/23328	8.4e-05	0.00177815	0.00113965	Ctsd/Abca1/Grn/Acp2/Hexa/Sh3glb1	6
C7	GO:0048661	positive regulation of smooth muscle cell proliferation	5/98	108/23328	8.47e-05	0.00177815	0.00113965	Igf1/Hmox1/Tgm2/Hbegf/Aif1	5
C7	GO:0042129	regulation of T cell proliferation	6/98	175/23328	8.67e-05	0.00178936	0.00114683	Vcam1/Igf1/Cd86/Il1a/Aif1/Cd81	6
C7	GO:0042060	wound healing	8/98	349/23328	9.78e-05	0.0019847	0.00127204	Igf1/Hmox1/Entpd1/Dst/Mertk/Hbegf/Il1a/Apoe	8
C7	GO:0061024	membrane organization	12/98	803/23328	0.000112472	0.00223113	0.00142998	Marco/Abca1/Dmpk/Epb41l3/Psap/Sirpa/Sh3glb1/Atp8a1/Abcb4/Aif1/Appl2/Apoe	12
C7	GO:0022409	positive regulation of cell-cell adhesion	7/98	265/23328	0.000113665	0.00223113	0.00142998	Vcam1/Igf1/Cd86/Sirpa/Il1a/Aif1/Cd81	7
C7	GO:0006909	phagocytosis	8/98	358/23328	0.000116631	0.00225301	0.001444	Marco/Abca1/Tgm2/Sirpa/Mertk/Aif1/Appl2/Nr1h3	8
C7	GO:0002683	negative regulation of immune system process	9/98	462/23328	0.000122565	0.00230201	0.00147541	C1qc/Igf1/Hmox1/Grn/Mafb/Cd86/Bank1/Mertk/Nr1h3	9
C7	GO:0015711	organic anion transport	9/98	463/23328	0.000124576	0.00230201	0.00147541	Abca1/Abcc3/Psap/Atp8a1/Il1a/Abcb4/Slc43a2/Pitpnc1/Apoe	9
C7	GO:0006956	complement activation	6/98	187/23328	0.000124842	0.00230201	0.00147541	Cd5l/Fcna/C1qb/C1qc/C1qa/Cfp	6
C7	GO:0019216	regulation of lipid metabolic process	8/98	363/23328	0.000128293	0.00233034	0.00149356	Igf1/Psap/Sh3glb1/Il1a/Appl2/Cd81/Nr1h3/Apoe	8
C7	GO:0002695	negative regulation of leukocyte activation	6/98	189/23328	0.000132312	0.002368	0.0015177	Hmox1/Grn/Cd86/Bank1/Mertk/Nr1h3	6
C7	GO:0032496	response to lipopolysaccharide	8/98	368/23328	0.000140904	0.00248521	0.00159282	Abca1/Mrc1/Cd86/Sirpa/Il1a/Fcgr4/Nr1h3/Sash1	8
C7	GO:0051249	regulation of lymphocyte activation	10/98	583/23328	0.00014445	0.00251137	0.00160959	Vcam1/Igf1/Cd86/Lamp1/Bank1/Sirpa/Mertk/Il1a/Aif1/Cd81	10
C7	GO:0001817	regulation of cytokine production	11/98	707/23328	0.000156014	0.0026742	0.00171395	Lpl/Igf1/Hmox1/Pld3/Bank1/Sirpa/Mertk/Il1a/Aif1/Appl2/Cd81	11
C7	GO:0048771	tissue remodeling	6/98	196/23328	0.000161294	0.00272205	0.00174461	Igf1/Lipa/Csf1r/Tgm2/Il1a/Fcgr4	6
C7	GO:1902533	positive regulation of intracellular signal transduction	13/98	967/23328	0.000164177	0.00272205	0.00174461	Marco/Igf1/Csf1r/Cd86/Psap/Tgm2/Bank1/Sh3glb1/Hbegf/Il1a/Cd81/Sash1/Apoe	13
C7	GO:0033993	response to lipid	12/98	837/23328	0.000165515	0.00272205	0.00174461	Lpl/Igf1/Abca1/Grn/Mrc1/Cd86/Sirpa/Il1a/Abcb4/Fcgr4/Nr1h3/Sash1	12
C7	GO:0006820	anion transport	10/98	597/23328	0.000175018	0.00283995	0.00182018	Abca1/Abcc3/Psap/Atp8a1/Il1a/Abcb4/Slc43a2/Clcn5/Pitpnc1/Apoe	10
C7	GO:0044255	cellular lipid metabolic process	13/98	981/23328	0.000189008	0.00302662	0.00193982	Lpl/Lipa/Csf1r/Ptgs1/Psap/Hexa/Sh3glb1/Appl2/Hpgds/Pitpnc1/Cd81/Nr1h3/Apoe	13
C7	GO:0009611	response to wounding	9/98	492/23328	0.000196136	0.00309997	0.00198683	Igf1/Hmox1/Grn/Entpd1/Dst/Mertk/Hbegf/Il1a/Apoe	9
C7	GO:0002237	response to molecule of bacterial origin	8/98	389/23328	0.000205592	0.00317065	0.00203213	Abca1/Mrc1/Cd86/Sirpa/Il1a/Fcgr4/Nr1h3/Sash1	8
C7	GO:0097435	supramolecular fiber organization	11/98	730/23328	0.000205819	0.00317065	0.00203213	Cdh5/Dst/Marcks/Colgalt1/Actn1/Sirpa/Tmsb4x/Csrp1/Aif1/Hip1/Apoe	11
C7	GO:0044070	regulation of anion transport	5/98	133/23328	0.000225366	0.00342837	0.00219732	Atp8a1/Il1a/Abcb4/Slc43a2/Apoe	5
C7	GO:0046394	carboxylic acid biosynthetic process	7/98	299/23328	0.00023849	0.00358324	0.00229657	Lpl/Ptgs1/Glul/Hpgds/Nr1h3/Gatm/Akr1a1	7
C7	GO:0016053	organic acid biosynthetic process	7/98	300/23328	0.000243378	0.00361208	0.00231506	Lpl/Ptgs1/Glul/Hpgds/Nr1h3/Gatm/Akr1a1	7
C7	GO:0042098	T cell proliferation	6/98	213/23328	0.000252801	0.00370673	0.00237572	Vcam1/Igf1/Cd86/Il1a/Aif1/Cd81	6
C7	GO:1903037	regulation of leukocyte cell-cell adhesion	7/98	309/23328	0.000291104	0.00420072	0.00269233	Vcam1/Igf1/Cd86/Sirpa/Il1a/Aif1/Cd81	7
C7	GO:0097529	myeloid leukocyte migration	6/98	219/23328	0.000293395	0.00420072	0.00269233	Csf1r/Sirpa/Lgmn/Il1a/Aif1/Cd81	6
C7	GO:0048871	multicellular organismal homeostasis	9/98	521/23328	0.000299132	0.00423307	0.00271306	Slc40a1/Lipa/Csf1r/Ptgs1/Il1a/Appl2/Fcgr4/Nr1h3/Gatm	9
C7	GO:0043410	positive regulation of MAPK cascade	9/98	523/23328	0.000307635	0.00430335	0.0027581	Marco/Igf1/Csf1r/Psap/Bank1/Il1a/Cd81/Sash1/Apoe	9
C7	GO:0051345	positive regulation of hydrolase activity	9/98	524/23328	0.000311961	0.00431427	0.0027651	Ctsd/Myo9a/Grn/Cd86/Psap/Lgmn/Pkp4/Nr1h3/Hip1	9
C7	GO:0002253	activation of immune response	8/98	416/23328	0.000322822	0.00436527	0.00279779	Cd5l/Fcna/C1qb/C1qc/C1qa/Cfp/Appl2/Cd81	8
C7	GO:0051251	positive regulation of lymphocyte activation	8/98	416/23328	0.000322822	0.00436527	0.00279779	Vcam1/Igf1/Cd86/Lamp1/Sirpa/Il1a/Aif1/Cd81	8
C7	GO:0023014	signal transduction by protein phosphorylation	11/98	778/23328	0.000354344	0.00473887	0.00303724	Marco/Igf1/Clec1b/Csf1r/Psap/Bank1/Sirpa/Il1a/Cd81/Sash1/Apoe	11
C7	GO:0051235	maintenance of location	7/98	320/23328	0.000359372	0.00474064	0.00303837	Ftl1/Lpl/Fth1/Tmsb4x/Hexa/Nr1h3/Apoe	7
C7	GO:0002252	immune effector process	12/98	912/23328	0.000362268	0.00474064	0.00303837	Cd5l/Fcna/C1qb/C1qc/Hmox1/C1qa/Cfp/Grn/Cd86/Lamp1/Appl2/Cd81	12
C7	GO:0050863	regulation of T cell activation	7/98	321/23328	0.000366165	0.00474067	0.00303839	Vcam1/Igf1/Cd86/Sirpa/Il1a/Aif1/Cd81	7
C7	GO:0002274	myeloid leukocyte activation	6/98	231/23328	0.000389858	0.00494226	0.0031676	Hmox1/C1qa/Grn/Aif1/Fcgr4/Nr1h3	6
C7	GO:0050670	regulation of lymphocyte proliferation	6/98	231/23328	0.000389858	0.00494226	0.0031676	Vcam1/Igf1/Cd86/Il1a/Aif1/Cd81	6
C7	GO:0032944	regulation of mononuclear cell proliferation	6/98	234/23328	0.000417463	0.00523765	0.00335692	Vcam1/Igf1/Cd86/Il1a/Aif1/Cd81	6
C7	GO:0055088	lipid homeostasis	5/98	153/23328	0.000429933	0.00533906	0.00342191	Lpl/Abca1/Abcb4/Nr1h3/Apoe	5
C7	GO:0045785	positive regulation of cell adhesion	8/98	435/23328	0.000434325	0.00533913	0.00342196	Vcam1/Igf1/Cd86/Tgm2/Sirpa/Il1a/Aif1/Cd81	8
C7	GO:0032675	regulation of interleukin-6 production	5/98	156/23328	0.000469807	0.00571755	0.00366449	Lpl/Bank1/Sirpa/Il1a/Aif1	5
C7	GO:0070661	leukocyte proliferation	7/98	344/23328	0.000553099	0.00666457	0.00427146	Vcam1/Igf1/Csf1r/Cd86/Il1a/Aif1/Cd81	7
C7	GO:0007159	leukocyte cell-cell adhesion	7/98	345/23328	0.000562683	0.00669932	0.00429373	Vcam1/Igf1/Cd86/Sirpa/Il1a/Aif1/Cd81	7
C7	GO:0032940	secretion by cell	12/98	959/23328	0.000566993	0.00669932	0.00429373	Igf1/Hmox1/Abca1/Entpd1/Lamp1/Ptgs1/Psap/Mertk/Glul/Il1a/Nr1h3/Apoe	12
C7	GO:0048660	regulation of smooth muscle cell proliferation	5/98	165/23328	0.000606258	0.00709439	0.00454694	Igf1/Hmox1/Tgm2/Hbegf/Aif1	5
C7	GO:0032635	interleukin-6 production	5/98	167/23328	0.000640238	0.00741427	0.00475196	Lpl/Bank1/Sirpa/Il1a/Aif1	5
C7	GO:0055082	cellular chemical homeostasis	11/98	836/23328	0.000645779	0.00741427	0.00475196	Slc40a1/Vcam1/Ftl1/Igf1/Hmox1/Cdh5/Grn/Dmpk/Fth1/Tgm2/Apoe	11
C7	GO:0048659	smooth muscle cell proliferation	5/98	170/23328	0.000693859	0.00789183	0.00505804	Igf1/Hmox1/Tgm2/Hbegf/Aif1	5
C7	GO:0050900	leukocyte migration	7/98	360/23328	0.000723005	0.00803196	0.00514785	Vcam1/Csf1r/Sirpa/Lgmn/Il1a/Aif1/Cd81	7
C7	GO:0010942	positive regulation of cell death	10/98	715/23328	0.00072308	0.00803196	0.00514785	Hmox1/Ctsd/C1qa/Grn/Tgm2/Ctsz/Sh3glb1/Hip1/Dnmt3a/Apoe	10
C7	GO:0001818	negative regulation of cytokine production	6/98	260/23328	0.000725978	0.00803196	0.00514785	Igf1/Hmox1/Bank1/Sirpa/Mertk/Appl2	6
C7	GO:0043408	regulation of MAPK cascade	10/98	717/23328	0.0007387	0.00809909	0.00519087	Marco/Igf1/Csf1r/Psap/Bank1/Sirpa/Il1a/Cd81/Sash1/Apoe	10
C7	GO:0042116	macrophage activation	4/98	100/23328	0.0007807	0.00840803	0.00538887	C1qa/Grn/Aif1/Nr1h3	4
C7	GO:0046889	positive regulation of lipid biosynthetic process	4/98	100/23328	0.0007807	0.00840803	0.00538887	Igf1/Il1a/Nr1h3/Apoe	4
C7	GO:0048608	reproductive structure development	8/98	477/23328	0.000793495	0.00840803	0.00538887	Ctsb/Vcam1/Igf1/Serpinb6a/Psap/Mertk/Ctsl/Il1a	8
C7	GO:0044283	small molecule biosynthetic process	9/98	597/23328	0.000796256	0.00840803	0.00538887	Lpl/Entpd1/Ptgs1/Glul/Hpgds/Nr1h3/Gatm/Akr1a1/Apoe	9
C7	GO:0040008	regulation of growth	10/98	726/23328	0.000812488	0.00840803	0.00538887	Igf1/Selenop/Sema6d/Creg1/Epb41l3/Lgmn/Sh3glb1/Hbegf/Cd81/Apoe	10
C7	GO:0002696	positive regulation of leukocyte activation	8/98	479/23328	0.00081524	0.00840803	0.00538887	Vcam1/Igf1/Cd86/Lamp1/Sirpa/Il1a/Aif1/Cd81	8
C7	GO:0050808	synapse organization	8/98	479/23328	0.00081524	0.00840803	0.00538887	C1qb/C1qc/Actb/C1qa/Dmpk/Actn1/Lgmn/Apoe	8
C7	GO:0061458	reproductive system development	8/98	481/23328	0.000837463	0.00856464	0.00548925	Ctsb/Vcam1/Igf1/Serpinb6a/Psap/Mertk/Ctsl/Il1a	8
C7	GO:0050821	protein stabilization	5/98	178/23328	0.000853297	0.00865386	0.00554643	Igf1/Grn/Lamp1/Ifi30/Hip1	5
C7	GO:0046916	cellular transition metal ion homeostasis	4/98	104/23328	0.000904081	0.00903194	0.00578875	Slc40a1/Ftl1/Hmox1/Fth1	4
C7	GO:0032787	monocarboxylic acid metabolic process	9/98	608/23328	0.00090542	0.00903194	0.00578875	Lpl/Igf1/Lipa/Ptgs1/Appl2/Hpgds/Nr1h3/Gatm/Akr1a1	9
C7	GO:0060627	regulation of vesicle-mediated transport	9/98	611/23328	0.000937219	0.00923888	0.00592139	Hmox1/Lamp1/Sirpa/Mertk/Sh3glb1/Appl2/Nr1h3/Hip1/Apoe	9
C7	GO:1901214	regulation of neuron death	7/98	377/23328	0.000946406	0.00923888	0.00592139	Igf1/Hmox1/C1qa/Grn/Ctsz/Lgmn/Apoe	7
C7	GO:0007610	behavior	10/98	741/23328	0.00094894	0.00923888	0.00592139	Igf1/Selenop/Grn/Ptgs1/Psap/Lgmn/Hexa/Atp8a1/Gatm/Apoe	10
C7	GO:0009991	response to extracellular stimulus	7/98	378/23328	0.00096107	0.00928272	0.00594948	Vcam1/Lpl/Glul/Sh3glb1/Appl2/Gatm/Apoe	7
C7	GO:0014812	muscle cell migration	4/98	106/23328	0.000970653	0.00930146	0.00596149	Igf1/Sema6d/Tmsb4x/Aif1	4
C7	GO:0044057	regulation of system process	9/98	617/23328	0.00100355	0.00954153	0.00611536	Igf1/Dmpk/Ptgs1/Hbegf/Il1a/Aif1/Fcgr4/Nr1h3/Apoe	9
C7	GO:0050867	positive regulation of cell activation	8/98	496/23328	0.00102014	0.00962415	0.00616831	Vcam1/Igf1/Cd86/Lamp1/Sirpa/Il1a/Aif1/Cd81	8
C7	GO:0045766	positive regulation of angiogenesis	5/98	188/23328	0.00108924	0.010197	0.00653546	Hmox1/Cdh5/Grn/Il1a/Sash1	5
C7	GO:0032612	interleukin-1 production	4/98	110/23328	0.00111402	0.0103493	0.00663309	Lpl/Igf1/Abca1/Sirpa	4
C7	GO:0031647	regulation of protein stability	6/98	287/23328	0.00120871	0.0111404	0.00714011	Igf1/Grn/Lamp1/Ifi30/Cd81/Hip1	6
C7	GO:1903531	negative regulation of secretion by cell	5/98	193/23328	0.00122389	0.0111404	0.00714011	Hmox1/Entpd1/Ptgs1/Nr1h3/Apoe	5
C7	GO:0033674	positive regulation of kinase activity	8/98	511/23328	0.0012335	0.0111404	0.00714011	Igf1/Csf1r/Cd86/Mertk/Sh3glb1/Hbegf/Cd81/Sash1	8
C7	GO:0000165	MAPK cascade	10/98	768/23328	0.00124196	0.0111404	0.00714011	Marco/Igf1/Csf1r/Psap/Bank1/Sirpa/Il1a/Cd81/Sash1/Apoe	10
C7	GO:0051051	negative regulation of transport	8/98	512/23328	0.0012489	0.0111404	0.00714011	Hmox1/Entpd1/Ptgs1/Sirpa/Slc43a2/Appl2/Nr1h3/Apoe	8
C7	GO:0043549	regulation of kinase activity	10/98	769/23328	0.0012541	0.0111404	0.00714011	Igf1/Actb/Csf1r/Cd86/Mertk/Sh3glb1/Hbegf/Cd81/Sash1/Apoe	10
C7	GO:0050731	positive regulation of peptidyl-tyrosine phosphorylation	5/98	195/23328	0.00128106	0.0112974	0.00724075	Igf1/Csf1r/Bank1/Hbegf/Cd81	5
C7	GO:0072330	monocarboxylic acid biosynthetic process	5/98	196/23328	0.00131037	0.0114728	0.00735315	Lpl/Ptgs1/Hpgds/Nr1h3/Gatm	5
C7	GO:0006911	phagocytosis, engulfment	5/98	197/23328	0.00134018	0.01165	0.00746669	Marco/Abca1/Sirpa/Aif1/Appl2	5
C7	GO:0030307	positive regulation of cell growth	5/98	198/23328	0.00137048	0.0118289	0.00758138	Igf1/Sh3glb1/Hbegf/Cd81/Apoe	5
C7	GO:0006959	humoral immune response	7/98	406/23328	0.00145	0.0124271	0.00796479	Cd5l/Fcna/C1qb/C1qc/C1qa/Cfp/Cd81	7
C7	GO:0007611	learning or memory	6/98	299/23328	0.00148905	0.0125908	0.00806969	Igf1/Ptgs1/Lgmn/Atp8a1/Gatm/Apoe	6
C7	GO:0043534	blood vessel endothelial cell migration	4/98	119/23328	0.00148979	0.0125908	0.00806969	Igf1/Hmox1/Cdh5/Apoe	4
C7	GO:0007167	enzyme linked receptor protein signaling pathway	11/98	928/23328	0.00150273	0.0126126	0.00808366	Igf1/Cdh5/Csf1r/Mertk/Lgmn/Hexa/Sh3glb1/Gfra2/Hbegf/Appl2/Hip1	11
C7	GO:0043066	negative regulation of apoptotic process	11/98	931/23328	0.00154166	0.0128507	0.00823625	Slc40a1/Igf1/Hmox1/Cdh5/Grn/Csf1r/Mertk/Lgmn/Sh3glb1/Aif1/Apoe	11
C7	GO:0045216	cell-cell junction organization	5/98	205/23328	0.00159698	0.0132213	0.00847379	Cdh5/Actb/Epb41l3/Csf1r/Pkp4	5
C7	GO:0035239	tube morphogenesis	11/98	937/23328	0.001622	0.0132442	0.00848846	Igf1/Hmox1/Cdh5/Grn/Tgm2/Ctsz/Glul/Hbegf/Il1a/Sash1/Apoe	11
C7	GO:0099024	plasma membrane invagination	5/98	206/23328	0.00163146	0.0132442	0.00848846	Marco/Abca1/Sirpa/Aif1/Appl2	5
C7	GO:0030003	cellular cation homeostasis	9/98	662/23328	0.0016324	0.0132442	0.00848846	Slc40a1/Ftl1/Hmox1/Cdh5/Grn/Dmpk/Fth1/Tgm2/Apoe	9
C7	GO:0070997	neuron death	7/98	416/23328	0.00166532	0.0134218	0.00860232	Igf1/Hmox1/C1qa/Grn/Ctsz/Lgmn/Apoe	7
C7	GO:1904018	positive regulation of vasculature development	5/98	208/23328	0.00170204	0.0136275	0.00873416	Hmox1/Cdh5/Grn/Il1a/Sash1	5
C7	GO:0070372	regulation of ERK1 and ERK2 cascade	6/98	308/23328	0.00172996	0.0137606	0.00881943	Marco/Igf1/Csf1r/Sirpa/Il1a/Apoe	6
C7	GO:0050778	positive regulation of immune response	9/98	670/23328	0.00177175	0.0140014	0.00897379	Cd5l/Fcna/C1qb/C1qc/C1qa/Cfp/Lamp1/Appl2/Cd81	9
C7	GO:0043069	negative regulation of programmed cell death	11/98	951/23328	0.0018229	0.0141248	0.00905285	Slc40a1/Igf1/Hmox1/Cdh5/Grn/Csf1r/Mertk/Lgmn/Sh3glb1/Aif1/Apoe	11
C7	GO:1901216	positive regulation of neuron death	4/98	126/23328	0.00183725	0.0141248	0.00905285	C1qa/Grn/Ctsz/Apoe	4
C7	GO:0043112	receptor metabolic process	5/98	212/23328	0.0018499	0.0141248	0.00905285	Lgmn/Sh3glb1/Cd81/Nr1h3/Apoe	5
C7	GO:0030097	hemopoiesis	11/98	953/23328	0.00185319	0.0141248	0.00905285	C1qc/Clec1b/Csf1r/Mafb/Psap/Actn1/Sirpa/Mertk/Ctsl/Il1a/Cd81	11
C7	GO:0010324	membrane invagination	5/98	213/23328	0.0018883	0.0141248	0.00905285	Marco/Abca1/Sirpa/Aif1/Appl2	5
C7	GO:0014902	myotube differentiation	4/98	127/23328	0.00189109	0.0141248	0.00905285	Igf1/Dmpk/Pld3/Cd81	4
C7	GO:0042157	lipoprotein metabolic process	4/98	127/23328	0.00189109	0.0141248	0.00905285	Ctsd/Abca1/Glul/Apoe	4
C7	GO:0006873	cellular ion homeostasis	9/98	677/23328	0.00190138	0.0141248	0.00905285	Slc40a1/Ftl1/Hmox1/Cdh5/Grn/Dmpk/Fth1/Tgm2/Apoe	9
C7	GO:0034329	cell junction assembly	7/98	426/23328	0.0019048	0.0141248	0.00905285	Cdh5/Actb/Myo9a/Dst/Epb41l3/Actn1/Pkp4	7
C7	GO:0000904	cell morphogenesis involved in differentiation	10/98	814/23328	0.00190949	0.0141248	0.00905285	Actb/Sema6d/Dst/Clec1b/Csf1r/Actn1/Mertk/Hexa/Sh3glb1/Apoe	10
C7	GO:0019725	cellular homeostasis	11/98	957/23328	0.00191503	0.0141248	0.00905285	Slc40a1/Vcam1/Ftl1/Igf1/Hmox1/Cdh5/Grn/Dmpk/Fth1/Tgm2/Apoe	11
C7	GO:0022407	regulation of cell-cell adhesion	7/98	427/23328	0.00193015	0.0141505	0.00906936	Vcam1/Igf1/Cd86/Sirpa/Il1a/Aif1/Cd81	7
C7	GO:0046651	lymphocyte proliferation	6/98	317/23328	0.00199943	0.0145707	0.00933866	Vcam1/Igf1/Cd86/Il1a/Aif1/Cd81	6
C7	GO:0002685	regulation of leukocyte migration	5/98	217/23328	0.00204772	0.0148338	0.00950729	Csf1r/Lgmn/Il1a/Aif1/Cd81	5
C7	GO:0032943	mononuclear cell proliferation	6/98	320/23328	0.00209596	0.0150046	0.00961678	Vcam1/Igf1/Cd86/Il1a/Aif1/Cd81	6
C7	GO:0045765	regulation of angiogenesis	6/98	320/23328	0.00209596	0.0150046	0.00961678	Hmox1/Cdh5/Grn/Glul/Il1a/Sash1	6
C7	GO:0009617	response to bacterium	11/98	974/23328	0.00219695	0.0156356	0.0100212	Lpl/Abca1/Grn/Mrc1/Cd86/Bank1/Sirpa/Il1a/Fcgr4/Nr1h3/Sash1	11
C7	GO:0001558	regulation of cell growth	7/98	438/23328	0.0022266	0.0157545	0.0100974	Igf1/Sema6d/Epb41l3/Sh3glb1/Hbegf/Cd81/Apoe	7
C7	GO:0070371	ERK1 and ERK2 cascade	6/98	325/23328	0.00226464	0.0158487	0.0101577	Marco/Igf1/Csf1r/Sirpa/Il1a/Apoe	6
C7	GO:0050801	ion homeostasis	10/98	835/23328	0.00229849	0.0158487	0.0101577	Slc40a1/Ftl1/Hmox1/Cdh5/Abca1/Grn/Dmpk/Fth1/Tgm2/Apoe	10
C7	GO:0055076	transition metal ion homeostasis	4/98	134/23328	0.00229892	0.0158487	0.0101577	Slc40a1/Ftl1/Hmox1/Fth1	4
C7	GO:0007163	establishment or maintenance of cell polarity	5/98	223/23328	0.00230502	0.0158487	0.0101577	Igf1/Cdh5/Actb/Myo9a/Frmd4b	5
C7	GO:0051048	negative regulation of secretion	5/98	223/23328	0.00230502	0.0158487	0.0101577	Hmox1/Entpd1/Ptgs1/Nr1h3/Apoe	5
C7	GO:0046942	carboxylic acid transport	6/98	333/23328	0.0025556	0.0174728	0.0111987	Abcc3/Psap/Il1a/Abcb4/Slc43a2/Apoe	6
C7	GO:0050890	cognition	6/98	336/23328	0.00267166	0.0181643	0.0116419	Igf1/Ptgs1/Lgmn/Atp8a1/Gatm/Apoe	6
C7	GO:0015849	organic acid transport	6/98	337/23328	0.00271121	0.0183308	0.0117486	Abcc3/Psap/Il1a/Abcb4/Slc43a2/Apoe	6
C7	GO:0008610	lipid biosynthetic process	8/98	581/23328	0.00274544	0.0184596	0.0118312	Lpl/Igf1/Ptgs1/Sh3glb1/Il1a/Hpgds/Nr1h3/Apoe	8
C7	GO:0007169	transmembrane receptor protein tyrosine kinase signaling pathway	8/98	583/23328	0.00280367	0.0187476	0.0120157	Igf1/Csf1r/Mertk/Lgmn/Sh3glb1/Gfra2/Hbegf/Hip1	8
C7	GO:0002521	leukocyte differentiation	8/98	586/23328	0.00289282	0.0192381	0.0123301	C1qc/Csf1r/Mafb/Psap/Mertk/Ctsl/Il1a/Cd81	8
C7	GO:0033002	muscle cell proliferation	5/98	236/23328	0.00294226	0.0194605	0.0124726	Igf1/Hmox1/Tgm2/Hbegf/Aif1	5
C7	GO:1903530	regulation of secretion by cell	9/98	725/23328	0.00300909	0.0197949	0.012687	Igf1/Hmox1/Entpd1/Lamp1/Ptgs1/Glul/Il1a/Nr1h3/Apoe	9
C7	GO:0051347	positive regulation of transferase activity	8/98	591/23328	0.00304634	0.0198373	0.0127141	Igf1/Csf1r/Cd86/Mertk/Sh3glb1/Hbegf/Cd81/Sash1	8
C7	GO:0006633	fatty acid biosynthetic process	4/98	145/23328	0.00305626	0.0198373	0.0127141	Lpl/Ptgs1/Hpgds/Nr1h3	4
C7	GO:0030162	regulation of proteolysis	9/98	727/23328	0.00306443	0.0198373	0.0127141	Igf1/Ctsd/Grn/Serpinb6a/Ctsz/Lgmn/Nr1h3/Hip1/Apoe	9
C7	GO:0031667	response to nutrient levels	6/98	346/23328	0.0030873	0.0198796	0.0127412	Lpl/Glul/Sh3glb1/Appl2/Gatm/Apoe	6
C7	GO:0006898	receptor-mediated endocytosis	5/98	240/23328	0.00316167	0.0202514	0.0129795	Marco/Mrc1/Cd81/Hip1/Apoe	5
C7	GO:0006875	cellular metal ion homeostasis	8/98	596/23328	0.00320614	0.020348	0.0130414	Slc40a1/Ftl1/Hmox1/Cdh5/Dmpk/Fth1/Tgm2/Apoe	8
C7	GO:0007043	cell-cell junction assembly	4/98	147/23328	0.0032102	0.020348	0.0130414	Cdh5/Actb/Epb41l3/Pkp4	4
C7	GO:0051338	regulation of transferase activity	10/98	879/23328	0.00332146	0.0209441	0.0134235	Igf1/Actb/Csf1r/Cd86/Mertk/Sh3glb1/Hbegf/Cd81/Sash1/Apoe	10
C7	GO:0007613	memory	4/98	149/23328	0.00336934	0.0211365	0.0135468	Igf1/Ptgs1/Lgmn/Apoe	4
C7	GO:0001824	blastocyst development	4/98	150/23328	0.00345089	0.0214272	0.0137331	Igf1/Grn/Spic/Hbegf	4
C7	GO:0031099	regeneration	4/98	150/23328	0.00345089	0.0214272	0.0137331	Igf1/Hmox1/Grn/Cd81	4
C7	GO:1901342	regulation of vasculature development	6/98	356/23328	0.00354956	0.021928	0.0140541	Hmox1/Cdh5/Grn/Glul/Il1a/Sash1	6
C7	GO:0050729	positive regulation of inflammatory response	4/98	152/23328	0.00361801	0.022238	0.0142528	Lpl/Grn/Tgm2/Cd81	4
C7	GO:0046486	glycerolipid metabolic process	6/98	360/23328	0.00374822	0.0229225	0.0146915	Lpl/Csf1r/Sh3glb1/Pitpnc1/Nr1h3/Apoe	6
C7	GO:1901215	negative regulation of neuron death	5/98	251/23328	0.00382579	0.0232799	0.0149206	Igf1/Hmox1/Grn/Lgmn/Apoe	5
C7	GO:0055080	cation homeostasis	9/98	755/23328	0.0039274	0.0237793	0.0152407	Slc40a1/Ftl1/Hmox1/Cdh5/Grn/Dmpk/Fth1/Tgm2/Apoe	9
C7	GO:1901135	carbohydrate derivative metabolic process	10/98	901/23328	0.00395445	0.023792	0.0152488	Igf1/Itm2b/Entpd1/St3gal5/Gns/Psap/Hexa/Ctsl/Hbegf/Akr1a1	10
C7	GO:0002687	positive regulation of leukocyte migration	4/98	156/23328	0.00396859	0.023792	0.0152488	Csf1r/Lgmn/Il1a/Aif1	4
C7	GO:0009266	response to temperature stimulus	4/98	159/23328	0.00424614	0.0253311	0.0162352	Igf1/Hmox1/Il1a/Appl2	4
C7	GO:0098771	inorganic ion homeostasis	9/98	767/23328	0.00435115	0.025831	0.0165556	Slc40a1/Ftl1/Hmox1/Cdh5/Grn/Dmpk/Fth1/Tgm2/Apoe	9
C7	GO:0098609	cell-cell adhesion	9/98	768/23328	0.00438802	0.0258329	0.0165568	Vcam1/Igf1/Cdh5/Cd86/Sirpa/Pkp4/Il1a/Aif1/Cd81	9
C7	GO:0050678	regulation of epithelial cell proliferation	6/98	372/23328	0.00439392	0.0258329	0.0165568	Igf1/Hmox1/Grn/Glul/Ctsl/Apoe	6
C7	GO:0019752	carboxylic acid metabolic process	10/98	920/23328	0.00457517	0.0267692	0.0171569	Lpl/Igf1/Lipa/Ptgs1/Glul/Appl2/Hpgds/Nr1h3/Gatm/Akr1a1	10
C7	GO:0050730	regulation of peptidyl-tyrosine phosphorylation	5/98	263/23328	0.00465846	0.0271261	0.0173856	Igf1/Csf1r/Bank1/Hbegf/Cd81	5
C7	GO:0010035	response to inorganic substance	7/98	503/23328	0.00476099	0.0275911	0.0176837	Slc40a1/Hmox1/Psap/Sirpa/Lgmn/Il1a/Gatm	7
C7	GO:0006575	cellular modified amino acid metabolic process	4/98	165/23328	0.00484002	0.0279161	0.017892	Ctsb/Ctsl/Hpgds/Gatm	4
C7	GO:0001944	vasculature development	9/98	781/23328	0.00488994	0.028071	0.0179913	Igf1/Hmox1/Cdh5/Grn/Glul/Hbegf/Il1a/Sash1/Apoe	9
C7	GO:0010243	response to organonitrogen compound	10/98	932/23328	0.00500534	0.0285986	0.0183294	Vcam1/Lpl/Igf1/Actb/Lgmn/Appl2/Cd81/Dnmt3a/Gatm/Apoe	10
C7	GO:0042552	myelination	4/98	167/23328	0.00504976	0.0287176	0.0184057	Igf1/Epb41l3/Psap/Hexa	4
C7	GO:0043523	regulation of neuron apoptotic process	5/98	270/23328	0.00519982	0.0294334	0.0188645	Hmox1/Grn/Ctsz/Lgmn/Apoe	5
C7	GO:0048514	blood vessel morphogenesis	8/98	648/23328	0.00528482	0.029776	0.0190841	Hmox1/Cdh5/Grn/Glul/Hbegf/Il1a/Sash1/Apoe	8
C7	GO:0010721	negative regulation of cell development	6/98	387/23328	0.00531258	0.0297945	0.0190959	Igf1/Sema6d/Ctsz/Il1a/Appl2/Apoe	6
C7	GO:0007272	ensheathment of neurons	4/98	170/23328	0.00537568	0.0298731	0.0191463	Igf1/Epb41l3/Psap/Hexa	4
C7	GO:0008366	axon ensheathment	4/98	170/23328	0.00537568	0.0298731	0.0191463	Igf1/Epb41l3/Psap/Hexa	4
C7	GO:0010952	positive regulation of peptidase activity	4/98	171/23328	0.00548737	0.0302178	0.0193672	Ctsd/Grn/Lgmn/Hip1	4
C7	GO:0045931	positive regulation of mitotic cell cycle	4/98	171/23328	0.00548737	0.0302178	0.0193672	Igf1/Lgmn/Il1a/Aif1	4
C7	GO:0010038	response to metal ion	5/98	274/23328	0.00552845	0.0303069	0.0194243	Slc40a1/Hmox1/Lgmn/Il1a/Gatm	5
C7	GO:0002790	peptide secretion	7/98	522/23328	0.00580559	0.0314786	0.0201753	Igf1/Abca1/Psap/Glul/Il1a/Nr1h3/Apoe	7
C7	GO:0015718	monocarboxylic acid transport	4/98	174/23328	0.00583175	0.0314786	0.0201753	Abcc3/Il1a/Abcb4/Apoe	4
C7	GO:0051046	regulation of secretion	9/98	803/23328	0.00584034	0.0314786	0.0201753	Igf1/Hmox1/Entpd1/Lamp1/Ptgs1/Glul/Il1a/Nr1h3/Apoe	9
C7	GO:0016049	cell growth	7/98	523/23328	0.00586497	0.0314786	0.0201753	Igf1/Sema6d/Epb41l3/Sh3glb1/Hbegf/Cd81/Apoe	7
C7	GO:0031349	positive regulation of defense response	5/98	278/23328	0.00587153	0.0314786	0.0201753	Lpl/Grn/Lamp1/Tgm2/Cd81	5
C7	GO:0070201	regulation of establishment of protein localization	8/98	662/23328	0.00599041	0.0319751	0.0204935	Igf1/Ctsd/Glul/Sh3glb1/Il1a/Cd81/Nr1h3/Apoe	8
C7	GO:0042692	muscle cell differentiation	6/98	399/23328	0.00614341	0.0326486	0.0209251	Igf1/Dmpk/Pld3/Tmsb4x/Csrp1/Cd81	6
C7	GO:1901652	response to peptide	6/98	400/23328	0.00621668	0.0328944	0.0210827	Vcam1/Lpl/Igf1/Lgmn/Appl2/Gatm	6
C7	GO:0043436	oxoacid metabolic process	10/98	965/23328	0.00635441	0.0334776	0.0214564	Lpl/Igf1/Lipa/Ptgs1/Glul/Appl2/Hpgds/Nr1h3/Gatm/Akr1a1	10
C7	GO:0045859	regulation of protein kinase activity	8/98	673/23328	0.00659357	0.0345878	0.022168	Igf1/Actb/Csf1r/Cd86/Hbegf/Cd81/Sash1/Apoe	8
C7	GO:0001659	temperature homeostasis	4/98	181/23328	0.0066907	0.0346493	0.0222074	Il1a/Appl2/Nr1h3/Gatm	4
C7	GO:0002455	humoral immune response mediated by circulating immunoglobulin	4/98	181/23328	0.0066907	0.0346493	0.0222074	C1qb/C1qc/C1qa/Cd81	4
C7	GO:0045088	regulation of innate immune response	4/98	181/23328	0.0066907	0.0346493	0.0222074	Grn/Lamp1/Appl2/Apoe	4
C7	GO:0001525	angiogenesis	7/98	537/23328	0.00674496	0.0347586	0.0222775	Hmox1/Cdh5/Grn/Glul/Hbegf/Il1a/Sash1	7
C7	GO:0022604	regulation of cell morphogenesis	7/98	538/23328	0.00681138	0.0347586	0.0222775	Myo9a/Sema6d/Epb41l3/Csf1r/Fmnl2/Sh3glb1/Apoe	7
C7	GO:0043524	negative regulation of neuron apoptotic process	4/98	182/23328	0.00681987	0.0347586	0.0222775	Hmox1/Grn/Lgmn/Apoe	4
C7	GO:0006631	fatty acid metabolic process	6/98	408/23328	0.00682605	0.0347586	0.0222775	Lpl/Lipa/Ptgs1/Appl2/Hpgds/Nr1h3	6
C7	GO:0006979	response to oxidative stress	6/98	409/23328	0.00690517	0.035015	0.0224418	Hmox1/Ptgs1/Psap/Sirpa/Aif1/Apoe	6
C7	GO:0055065	metal ion homeostasis	8/98	680/23328	0.00700078	0.0353525	0.0226581	Slc40a1/Ftl1/Hmox1/Cdh5/Dmpk/Fth1/Tgm2/Apoe	8
C7	GO:0046890	regulation of lipid biosynthetic process	4/98	184/23328	0.00708315	0.0355094	0.0227587	Igf1/Il1a/Nr1h3/Apoe	4
C7	GO:0002831	regulation of response to biotic stimulus	5/98	291/23328	0.0070902	0.0355094	0.0227587	Grn/Lamp1/Appl2/Sash1/Apoe	5
C7	GO:0031644	regulation of nervous system process	4/98	185/23328	0.00721728	0.0359977	0.0230716	Igf1/Dmpk/Il1a/Fcgr4	4
C7	GO:0030099	myeloid cell differentiation	6/98	414/23328	0.00731078	0.0363152	0.0232751	C1qc/Clec1b/Csf1r/Mafb/Actn1/Cd81	6
C7	GO:0032989	cellular component morphogenesis	9/98	835/23328	0.00747151	0.0369627	0.0236901	Actb/Myo9a/Sema6d/Dst/Epb41l3/Csf1r/Csrp1/Sh3glb1/Apoe	9
C7	GO:0006082	organic acid metabolic process	10/98	991/23328	0.00760528	0.0374722	0.0240167	Lpl/Igf1/Lipa/Ptgs1/Glul/Appl2/Hpgds/Nr1h3/Gatm/Akr1a1	10
C7	GO:0051402	neuron apoptotic process	5/98	298/23328	0.00781491	0.0383498	0.0245792	Hmox1/Grn/Ctsz/Lgmn/Apoe	5
C7	GO:0052547	regulation of peptidase activity	6/98	421/23328	0.00790729	0.0385667	0.0247182	Igf1/Ctsd/Grn/Serpinb6a/Lgmn/Hip1	6
C7	GO:1901653	cellular response to peptide	5/98	299/23328	0.00792249	0.0385667	0.0247182	Vcam1/Lpl/Igf1/Lgmn/Appl2	5
C7	GO:0061351	neural precursor cell proliferation	4/98	191/23328	0.00805738	0.0390671	0.0250389	Igf1/Grn/Ctsz/Appl2	4
C7	GO:0048812	neuron projection morphogenesis	8/98	698/23328	0.0081356	0.0392898	0.0251816	Actb/Myo9a/Sema6d/Dst/Epb41l3/Csf1r/Sh3glb1/Apoe	8
C7	GO:0060326	cell chemotaxis	5/98	303/23328	0.00836315	0.0401511	0.0257337	Vcam1/Csf1r/Lgmn/Hbegf/Aif1	5
C7	GO:0007041	lysosomal transport	3/98	101/23328	0.00841293	0.0401511	0.0257337	Grn/Lamp1/Psap	3
C7	GO:0032755	positive regulation of interleukin-6 production	3/98	101/23328	0.00841293	0.0401511	0.0257337	Lpl/Il1a/Aif1	3
C7	GO:0010657	muscle cell apoptotic process	3/98	102/23328	0.00864239	0.0410851	0.0263323	Igf1/Hmox1/Dmpk	3
C7	GO:0043491	protein kinase B signaling	4/98	196/23328	0.00880467	0.0416937	0.0267223	Igf1/Bank1/Mertk/Hbegf	4
C7	GO:0002009	morphogenesis of an epithelium	7/98	567/23328	0.00895808	0.0422557	0.0270826	Igf1/Actb/Myo9a/Tgm2/Ctsz/Ctsl/Hbegf	7
C7	GO:0008202	steroid metabolic process	5/98	309/23328	0.00905565	0.042489	0.0272321	Igf1/Lipa/Abca1/Il1a/Apoe	5
C7	GO:0120039	plasma membrane bounded cell projection morphogenesis	8/98	712/23328	0.0091101	0.042489	0.0272321	Actb/Myo9a/Sema6d/Dst/Epb41l3/Csf1r/Sh3glb1/Apoe	8
C7	GO:0015844	monoamine transport	3/98	104/23328	0.00911228	0.042489	0.0272321	Actb/Entpd1/Ptgs1	3
C7	GO:0007015	actin filament organization	6/98	437/23328	0.00940164	0.0433074	0.0277566	Marcks/Actn1/Sirpa/Tmsb4x/Aif1/Hip1	6
C7	GO:0007264	small GTPase mediated signal transduction	6/98	437/23328	0.00940164	0.0433074	0.0277566	Igf1/Hmox1/Abca1/Rgl1/Aif1/Apoe	6
C7	GO:0045927	positive regulation of growth	5/98	312/23328	0.00941635	0.0433074	0.0277566	Igf1/Sh3glb1/Hbegf/Cd81/Apoe	5
C7	GO:0099173	postsynapse organization	4/98	200/23328	0.00943412	0.0433074	0.0277566	Actb/Actn1/Lgmn/Apoe	4
C7	GO:0048858	cell projection morphogenesis	8/98	717/23328	0.00947854	0.0433074	0.0277566	Actb/Myo9a/Sema6d/Dst/Epb41l3/Csf1r/Sh3glb1/Apoe	8
C7	GO:0050673	epithelial cell proliferation	6/98	438/23328	0.00950129	0.0433074	0.0277566	Igf1/Hmox1/Grn/Glul/Ctsl/Apoe	6
C7	GO:0008544	epidermis development	5/98	313/23328	0.00953876	0.0433159	0.0277621	Plod1/Ptgs1/Psap/Ctsl/Il1a	5
C7	GO:0000041	transition metal ion transport	3/98	106/23328	0.00959686	0.0434178	0.0278273	Slc40a1/Fth1/Slc48a1	3
C7	GO:0002697	regulation of immune effector process	6/98	440/23328	0.00970286	0.0435734	0.0279271	Cd5l/Hmox1/Grn/Lamp1/Appl2/Cd81	6
C7	GO:0045860	positive regulation of protein kinase activity	6/98	440/23328	0.00970286	0.0435734	0.0279271	Igf1/Csf1r/Cd86/Hbegf/Cd81/Sash1	6
C7	GO:0048145	regulation of fibroblast proliferation	3/98	107/23328	0.0098447	0.0438865	0.0281277	Igf1/Fth1/Ifi30	3
C7	GO:1903426	regulation of reactive oxygen species biosynthetic process	3/98	107/23328	0.0098447	0.0438865	0.0281277	Igf1/Sirpa/Aif1	3
C7	GO:0071900	regulation of protein serine/threonine kinase activity	6/98	442/23328	0.00990748	0.0439681	0.02818	Igf1/Actb/Csf1r/Cd81/Sash1/Apoe	6
C7	GO:0030155	regulation of cell adhesion	8/98	723/23328	0.00993527	0.0439681	0.02818	Vcam1/Igf1/Cd86/Tgm2/Sirpa/Il1a/Aif1/Cd81	8
C7	GO:0051146	striated muscle cell differentiation	5/98	317/23328	0.0100394	0.0441983	0.0283276	Igf1/Dmpk/Pld3/Csrp1/Cd81	5
C7	GO:0002224	toll-like receptor signaling pathway	3/98	108/23328	0.0100962	0.0441983	0.0283276	Cd86/Appl2/Nr1h3	3
C7	GO:0006641	triglyceride metabolic process	3/98	108/23328	0.0100962	0.0441983	0.0283276	Lpl/Nr1h3/Apoe	3
C7	GO:0019932	second-messenger-mediated signaling	6/98	445/23328	0.0102202	0.0445804	0.0285725	Vcam1/Igf1/Abca1/Dmpk/Adgre1/Apoe	6
C7	GO:0016236	macroautophagy	4/98	205/23328	0.0102613	0.0446	0.028585	Hmox1/Ctsd/Wdfy3/Sh3glb1	4
C7	GO:0048144	fibroblast proliferation	3/98	109/23328	0.0103515	0.044673	0.0286318	Igf1/Fth1/Ifi30	3
C7	GO:1900006	positive regulation of dendrite development	3/98	109/23328	0.0103515	0.044673	0.0286318	Grn/Sh3glb1/Apoe	3
C7	GO:0018108	peptidyl-tyrosine phosphorylation	5/98	322/23328	0.0106902	0.0458706	0.0293994	Igf1/Csf1r/Bank1/Hbegf/Cd81	5
C7	GO:0002250	adaptive immune response	7/98	587/23328	0.0107044	0.0458706	0.0293994	C1qb/C1qc/C1qa/Adgre1/Cd86/Il18bp/Cd81	7
C7	GO:0050679	positive regulation of epithelial cell proliferation	4/98	208/23328	0.0107795	0.0460302	0.0295017	Igf1/Hmox1/Grn/Glul	4
C7	GO:0019218	regulation of steroid metabolic process	3/98	111/23328	0.0108732	0.0461071	0.029551	Igf1/Il1a/Apoe	3
C7	GO:0030316	osteoclast differentiation	3/98	111/23328	0.0108732	0.0461071	0.029551	Csf1r/Mafb/Cd81	3
C7	GO:0016042	lipid catabolic process	5/98	324/23328	0.0109585	0.0463072	0.0296792	Lpl/Lipa/Psap/Hexa/Apoe	5
C7	GO:0018212	peptidyl-tyrosine modification	5/98	325/23328	0.0110943	0.0465878	0.0298591	Igf1/Csf1r/Bank1/Hbegf/Cd81	5
C7	GO:0007009	plasma membrane organization	3/98	112/23328	0.0111397	0.0465878	0.0298591	Epb41l3/Psap/Sh3glb1	3
C7	GO:0038127	ERBB signaling pathway	3/98	112/23328	0.0111397	0.0465878	0.0298591	Lgmn/Hbegf/Hip1	3
C7	GO:0032990	cell part morphogenesis	8/98	740/23328	0.0113187	0.0471744	0.030235	Actb/Myo9a/Sema6d/Dst/Epb41l3/Csf1r/Sh3glb1/Apoe	8
C7	GO:0050764	regulation of phagocytosis	3/98	113/23328	0.01141	0.0473923	0.0303747	Sirpa/Mertk/Appl2	3
C7	GO:0043269	regulation of ion transport	8/98	743/23328	0.011577	0.0479225	0.0307145	Igf1/Entpd1/Dmpk/Atp8a1/Il1a/Abcb4/Slc43a2/Apoe	8
C7	GO:0051651	maintenance of location in cell	4/98	213/23328	0.0116802	0.0481857	0.0308832	Ftl1/Fth1/Tmsb4x/Apoe	4
C7	GO:0048872	homeostasis of number of cells	5/98	330/23328	0.0117909	0.0484779	0.0310705	Slc40a1/Hmox1/Lipa/Mafb/Mertk	5
C7	GO:0001568	blood vessel development	8/98	747/23328	0.0119281	0.0488321	0.0312975	Hmox1/Cdh5/Grn/Glul/Hbegf/Il1a/Sash1/Apoe	8
C7	GO:0030216	keratinocyte differentiation	3/98	115/23328	0.0119618	0.0488321	0.0312975	Ptgs1/Psap/Il1a	3
C7	GO:0048839	inner ear development	4/98	215/23328	0.0120536	0.0488321	0.0312975	C1qb/Igf1/Mafb/Psap	4
C7	GO:0009100	glycoprotein metabolic process	5/98	332/23328	0.0120776	0.0488321	0.0312975	Igf1/Itm2b/St3gal5/Ctsl/Hbegf	5
C7	GO:0062197	cellular response to chemical stress	5/98	332/23328	0.0120776	0.0488321	0.0312975	Hmox1/Serpinb6a/Psap/Sirpa/Aif1	5
C7	GO:0070374	positive regulation of ERK1 and ERK2 cascade	4/98	216/23328	0.0122432	0.0490136	0.0314138	Marco/Csf1r/Il1a/Apoe	4
C7	GO:0019882	antigen processing and presentation	3/98	116/23328	0.0122433	0.0490136	0.0314138	Psap/Ctsl/Ifi30	3
C7	GO:0051952	regulation of amine transport	3/98	116/23328	0.0122433	0.0490136	0.0314138	Entpd1/Ptgs1/Slc43a2	3
C7	GO:0031668	cellular response to extracellular stimulus	4/98	217/23328	0.0124346	0.0496162	0.0318001	Vcam1/Lpl/Glul/Sh3glb1	4
C8	GO:0006954	inflammatory response	20/98	729/23328	2.12e-11	1.46e-08	8.57e-09	Apoe/Cx3cr1/Csf1r/Pf4/Stab1/C3ar1/Ctss/Lpl/C1qa/Jun/Ednrb/Grn/Ifngr2/Axl/Lrp1/Nr1h3/Slc11a1/Fcgr1/Aif1/Trem2	20
C8	GO:0006897	endocytosis	19/98	647/23328	2.26e-11	1.46e-08	8.57e-09	Apoe/Mrc1/Msr1/Dab2/Ehd4/Abca1/Itgb1/Cd36/Grn/Bin1/Axl/Lrp1/Cltc/Scarb2/Nr1h3/Snx5/Fcgr1/Aif1/Trem2	19
C8	GO:0030335	positive regulation of cell migration	17/98	564/23328	1.94e-10	8.37e-08	4.9e-08	Cx3cr1/Csf1r/Dab2/C3ar1/Egr1/Hspa5/Itgb1/Jun/Rhob/Grn/Lrp1/Gas6/Aif1/Tgfbr1/Myo5a/Calr/Trem2	17
C8	GO:2000147	positive regulation of cell motility	17/98	587/23328	3.58e-10	1.01e-07	5.9e-08	Cx3cr1/Csf1r/Dab2/C3ar1/Egr1/Hspa5/Itgb1/Jun/Rhob/Grn/Lrp1/Gas6/Aif1/Tgfbr1/Myo5a/Calr/Trem2	17
C8	GO:0042116	macrophage activation	9/98	100/23328	3.89e-10	1.01e-07	5.9e-08	Cx3cr1/C1qa/Jun/Grn/Ifngr2/Nr1h3/Slc11a1/Aif1/Trem2	9
C8	GO:0040017	positive regulation of locomotion	17/98	603/23328	5.39e-10	1.13e-07	6.62e-08	Cx3cr1/Csf1r/Dab2/C3ar1/Egr1/Hspa5/Itgb1/Jun/Rhob/Grn/Lrp1/Gas6/Aif1/Tgfbr1/Myo5a/Calr/Trem2	17
C8	GO:0051272	positive regulation of cellular component movement	17/98	608/23328	6.11e-10	1.13e-07	6.62e-08	Cx3cr1/Csf1r/Dab2/C3ar1/Egr1/Hspa5/Itgb1/Jun/Rhob/Grn/Lrp1/Gas6/Aif1/Tgfbr1/Myo5a/Calr/Trem2	17
C8	GO:0030334	regulation of cell migration	20/98	936/23328	1.69e-09	2.73e-07	1.6e-07	Apoe/Cx3cr1/Csf1r/Dab2/C3ar1/Egr1/Hspa5/Itgb1/Jun/Rhob/Grn/Lrp1/Spred1/Gas6/Plxnb2/Aif1/Tgfbr1/Myo5a/Calr/Trem2	20
C8	GO:0045807	positive regulation of endocytosis	9/98	122/23328	2.31e-09	3.18e-07	1.86e-07	Apoe/Dab2/Itgb1/Cd36/Bin1/Axl/Lrp1/Fcgr1/Trem2	9
C8	GO:0030100	regulation of endocytosis	11/98	222/23328	2.45e-09	3.18e-07	1.86e-07	Apoe/Dab2/Ehd4/Itgb1/Cd36/Bin1/Axl/Lrp1/Nr1h3/Fcgr1/Trem2	11
C8	GO:0006909	phagocytosis	13/98	358/23328	3.5e-09	4.12e-07	2.41e-07	Msr1/Abca1/Itgb1/Cd36/Axl/Lrp1/Gas6/Nr1h3/Slc11a1/Fcgr1/Aif1/Calr/Trem2	13
C8	GO:2000145	regulation of cell motility	20/98	986/23328	4.1e-09	4.42e-07	2.59e-07	Apoe/Cx3cr1/Csf1r/Dab2/C3ar1/Egr1/Hspa5/Itgb1/Jun/Rhob/Grn/Lrp1/Spred1/Gas6/Plxnb2/Aif1/Tgfbr1/Myo5a/Calr/Trem2	20
C8	GO:0060627	regulation of vesicle-mediated transport	16/98	611/23328	5.24e-09	5.22e-07	3.06e-07	Apoe/Dab2/Ehd4/Itgb1/Cd36/Bin1/Axl/Lrp1/Gas6/Nr1h3/Slc11a1/Fcgr1/Rap1b/Myo5a/Calr/Trem2	16
C8	GO:0043066	negative regulation of apoptotic process	19/98	931/23328	9.65e-09	8.93e-07	5.23e-07	Apoe/Cx3cr1/Csf1r/Pf4/Dab2/Hspa5/Slc40a1/Itgb1/Jun/Ednrb/Grn/Axl/Lrp1/Gas6/Hsp90b1/Cln8/Aif1/Tgfbr1/Trem2	19
C8	GO:0043069	negative regulation of programmed cell death	19/98	951/23328	1.36e-08	1.17e-06	6.86e-07	Apoe/Cx3cr1/Csf1r/Pf4/Dab2/Hspa5/Slc40a1/Itgb1/Jun/Ednrb/Grn/Axl/Lrp1/Gas6/Hsp90b1/Cln8/Aif1/Tgfbr1/Trem2	19
C8	GO:1905954	positive regulation of lipid localization	8/98	105/23328	1.45e-08	1.17e-06	6.86e-07	Apoe/Msr1/Dab2/Lpl/Abca1/Cd36/Lrp1/Nr1h3	8
C8	GO:0006898	receptor-mediated endocytosis	10/98	240/23328	6.99e-08	5.17e-06	3.03e-06	Apoe/Mrc1/Msr1/Dab2/Itgb1/Cd36/Lrp1/Cltc/Scarb2/Fcgr1	10
C8	GO:0070372	regulation of ERK1 and ERK2 cascade	11/98	308/23328	7.19e-08	5.17e-06	3.03e-06	Apoe/Csf1r/Dab2/Cd36/Jun/Lrp1/Spred1/Gas6/Dusp6/Rap1b/Trem2	11
C8	GO:0070371	ERK1 and ERK2 cascade	11/98	325/23328	1.24e-07	8.08e-06	4.73e-06	Apoe/Csf1r/Dab2/Cd36/Jun/Lrp1/Spred1/Gas6/Dusp6/Rap1b/Trem2	11
C8	GO:0000165	MAPK cascade	16/98	768/23328	1.25e-07	8.08e-06	4.73e-06	Apoe/Csf1r/Dab2/Cd36/Jun/Lrp1/Spred1/Gas6/Slc11a1/Dusp6/Tgfbr1/Rap1b/Hacd3/Trem2/Dok2/Bank1	16
C8	GO:0023014	signal transduction by protein phosphorylation	16/98	778/23328	1.49e-07	9.16e-06	5.37e-06	Apoe/Csf1r/Dab2/Cd36/Jun/Lrp1/Spred1/Gas6/Slc11a1/Dusp6/Tgfbr1/Rap1b/Hacd3/Trem2/Dok2/Bank1	16
C8	GO:0001816	cytokine production	16/98	785/23328	1.68e-07	9.87e-06	5.79e-06	Cx3cr1/Pf4/Maf/C3ar1/Lpl/Egr1/Atp2b1/Abca1/Cd36/Axl/Lrp1/Gas6/Slc11a1/Aif1/Trem2/Bank1	16
C8	GO:0030036	actin cytoskeleton organization	15/98	705/23328	2.47e-07	1.39e-05	8.14e-06	Csf1r/Marcks/Itgb5/Itgb1/Rhob/Bin1/Lrp1/Hsp90b1/Ctsl/Mtss1/Aif1/Tgfbr1/Myo5a/Calr/Tnfaip1	15
C8	GO:0007264	small GTPase mediated signal transduction	12/98	437/23328	3.05e-07	1.65e-05	9.64e-06	Apoe/Abca1/Itgb1/Rgl1/Jun/Rhob/Aif1/Rap1b/Cyth4/Tnfaip1/Hacd3/Dok2	12
C8	GO:0050900	leukocyte migration	11/98	360/23328	3.43e-07	1.78e-05	1.04e-05	Cx3cr1/Csf1r/Pf4/C3ar1/Itga9/Itgb1/Ednrb/Gas6/Aif1/Calr/Trem2	11
C8	GO:0030595	leukocyte chemotaxis	9/98	219/23328	3.67e-07	1.83e-05	1.07e-05	Cx3cr1/Csf1r/Pf4/C3ar1/Itga9/Ednrb/Gas6/Aif1/Calr	9
C8	GO:0033993	response to lipid	16/98	837/23328	3.96e-07	1.9e-05	1.11e-05	Mrc1/Cx3cr1/Pf4/Dab2/Lpl/Abca1/Cd36/Ednrb/Grn/Axl/Nr1h3/Slc11a1/Tgfbr1/Uba5/Calr/Trem2	16
C8	GO:0032612	interleukin-1 production	7/98	110/23328	4.15e-07	1.92e-05	1.13e-05	Cx3cr1/Lpl/Egr1/Abca1/Cd36/Gas6/Trem2	7
C8	GO:0072659	protein localization to plasma membrane	10/98	295/23328	4.72e-07	2.08e-05	1.22e-05	Dab2/Ehd4/Itgb1/Lrp1/Gas6/Cltc/Myo5a/Sqstm1/Trem2/Fyb	10
C8	GO:1905952	regulation of lipid localization	8/98	165/23328	4.84e-07	2.08e-05	1.22e-05	Apoe/Msr1/Dab2/Lpl/Abca1/Cd36/Lrp1/Nr1h3	8
C8	GO:0050764	regulation of phagocytosis	7/98	113/23328	4.99e-07	2.08e-05	1.22e-05	Cd36/Lrp1/Gas6/Slc11a1/Fcgr1/Calr/Trem2	7
C8	GO:1903076	regulation of protein localization to plasma membrane	7/98	114/23328	5.3e-07	2.14e-05	1.26e-05	Dab2/Itgb1/Lrp1/Cltc/Myo5a/Sqstm1/Trem2	7
C8	GO:0002274	myeloid leukocyte activation	9/98	231/23328	5.74e-07	2.25e-05	1.32e-05	Cx3cr1/C1qa/Jun/Grn/Ifngr2/Nr1h3/Slc11a1/Aif1/Trem2	9
C8	GO:0030029	actin filament-based process	15/98	793/23328	1.09e-06	4.14e-05	2.42e-05	Csf1r/Marcks/Itgb5/Itgb1/Rhob/Bin1/Lrp1/Hsp90b1/Ctsl/Mtss1/Aif1/Tgfbr1/Myo5a/Calr/Tnfaip1	15
C8	GO:0010876	lipid localization	11/98	413/23328	1.32e-06	4.88e-05	2.86e-05	Apoe/Msr1/Dab2/Lpl/Abca1/Cd36/Lrp1/Abca9/Scarb2/Nr1h3/Hexa	11
C8	GO:0032101	regulation of response to external stimulus	16/98	919/23328	1.36e-06	4.88e-05	2.86e-05	Apoe/Cx3cr1/Csf1r/C3ar1/Ctss/Lpl/Cd36/Ednrb/Grn/Lrp1/Gas6/Nr1h3/Fcgr1/Aif1/Calr/Trem2	16
C8	GO:0032103	positive regulation of response to external stimulus	11/98	418/23328	1.49e-06	5.14e-05	3.01e-05	Csf1r/C3ar1/Ctss/Lpl/Grn/Lrp1/Gas6/Fcgr1/Aif1/Calr/Trem2	11
C8	GO:0001817	regulation of cytokine production	14/98	707/23328	1.51e-06	5.14e-05	3.01e-05	Cx3cr1/Pf4/C3ar1/Lpl/Egr1/Atp2b1/Cd36/Axl/Lrp1/Gas6/Slc11a1/Aif1/Trem2/Bank1	14
C8	GO:0050731	positive regulation of peptidyl-tyrosine phosphorylation	8/98	195/23328	1.71e-06	5.67e-05	3.32e-05	Csf1r/Ehd4/Itgb1/Cd36/Gas6/Fcgr1/Trem2/Bank1	8
C8	GO:0043408	regulation of MAPK cascade	14/98	717/23328	1.78e-06	5.76e-05	3.37e-05	Apoe/Csf1r/Dab2/Cd36/Jun/Lrp1/Spred1/Gas6/Dusp6/Tgfbr1/Rap1b/Trem2/Dok2/Bank1	14
C8	GO:0050801	ion homeostasis	15/98	835/23328	2.05e-06	6.49e-05	3.8e-05	Apoe/Cx3cr1/Ftl1/C3ar1/Atp2b1/Abca1/Slc40a1/Cd36/Ednrb/Grn/Lrp1/Ckb/Slc11a1/Mtss1/Myo5a	15
C8	GO:1904375	regulation of protein localization to cell periphery	7/98	140/23328	2.12e-06	6.51e-05	3.81e-05	Dab2/Itgb1/Lrp1/Cltc/Myo5a/Sqstm1/Trem2	7
C8	GO:0097435	supramolecular fiber organization	14/98	730/23328	2.19e-06	6.51e-05	3.81e-05	Apoe/Marcks/Itgb5/Itgb1/Cd36/Rhob/Bin1/Hsp90b1/Mtss1/Aif1/Tgfbr1/Myo5a/Cst3/Tnfaip1	14
C8	GO:0007265	Ras protein signal transduction	10/98	350/23328	2.21e-06	6.51e-05	3.81e-05	Apoe/Abca1/Itgb1/Jun/Aif1/Rap1b/Cyth4/Tnfaip1/Hacd3/Dok2	10
C8	GO:0034330	cell junction organization	14/98	740/23328	2.57e-06	7.21e-05	4.23e-05	Apoe/C1qc/Cx3cr1/Csf1r/C1qb/Itgb1/C1qa/Lrp1/Plxnb2/Mtss1/Tgfbr1/Rap1b/Myo5a/Trem2	14
C8	GO:1901342	regulation of vasculature development	10/98	356/23328	2.57e-06	7.21e-05	4.23e-05	Cx3cr1/Pf4/Stab1/C3ar1/Egr1/Itgb1/Cd36/Rhob/Grn/Spred1	10
C8	GO:1902533	positive regulation of intracellular signal transduction	16/98	967/23328	2.62e-06	7.21e-05	4.23e-05	Apoe/Cx3cr1/Csf1r/Dab2/Itgb1/Cd36/Jun/Axl/Lrp1/Spred1/Gas6/Tgfbr1/Rap1b/Calr/Trem2/Bank1	16
C8	GO:0001568	blood vessel development	14/98	747/23328	2.86e-06	7.72e-05	4.53e-05	Apoe/Cx3cr1/Pf4/Stab1/C3ar1/Egr1/Itgb1/Cd36/Jun/Rhob/Grn/Lrp1/Spred1/Tgfbr1	14
C8	GO:1990778	protein localization to cell periphery	10/98	363/23328	3.06e-06	8.08e-05	4.74e-05	Dab2/Ehd4/Itgb1/Lrp1/Gas6/Cltc/Myo5a/Sqstm1/Trem2/Fyb	10
C8	GO:0048514	blood vessel morphogenesis	13/98	648/23328	3.21e-06	8.3e-05	4.87e-05	Apoe/Cx3cr1/Pf4/Stab1/C3ar1/Itgb1/Cd36/Jun/Rhob/Grn/Lrp1/Spred1/Tgfbr1	13
C8	GO:0032496	response to lipopolysaccharide	10/98	368/23328	3.45e-06	8.77e-05	5.14e-05	Mrc1/Cx3cr1/Pf4/Abca1/Cd36/Ednrb/Axl/Nr1h3/Slc11a1/Trem2	10
C8	GO:0070374	positive regulation of ERK1 and ERK2 cascade	8/98	216/23328	3.65e-06	9.1e-05	5.33e-05	Apoe/Csf1r/Cd36/Jun/Lrp1/Gas6/Rap1b/Trem2	8
C8	GO:0098771	inorganic ion homeostasis	14/98	767/23328	3.88e-06	9.48e-05	5.56e-05	Apoe/Cx3cr1/Ftl1/C3ar1/Atp2b1/Slc40a1/Cd36/Ednrb/Grn/Lrp1/Ckb/Slc11a1/Mtss1/Myo5a	14
C8	GO:0097529	myeloid leukocyte migration	8/98	219/23328	4.05e-06	9.7e-05	5.69e-05	Cx3cr1/Csf1r/Pf4/C3ar1/Itga9/Ednrb/Aif1/Trem2	8
C8	GO:0002687	positive regulation of leukocyte migration	7/98	156/23328	4.34e-06	0.000102254	5.99e-05	Cx3cr1/Csf1r/C3ar1/Gas6/Aif1/Calr/Trem2	7
C8	GO:0001944	vasculature development	14/98	781/23328	4.78e-06	0.000110452	6.47e-05	Apoe/Cx3cr1/Pf4/Stab1/C3ar1/Egr1/Itgb1/Cd36/Jun/Rhob/Grn/Lrp1/Spred1/Tgfbr1	14
C8	GO:0072657	protein localization to membrane	12/98	573/23328	5.12e-06	0.000115049	6.74e-05	Apoe/Dab2/Hspa5/Ehd4/Itgb1/Lrp1/Gas6/Cltc/Myo5a/Sqstm1/Trem2/Fyb	12
C8	GO:0006873	cellular ion homeostasis	13/98	677/23328	5.15e-06	0.000115049	6.74e-05	Apoe/Cx3cr1/Ftl1/C3ar1/Atp2b1/Slc40a1/Cd36/Ednrb/Grn/Lrp1/Ckb/Slc11a1/Myo5a	13
C8	GO:0060326	cell chemotaxis	9/98	303/23328	5.35e-06	0.000117365	6.88e-05	Cx3cr1/Csf1r/Pf4/C3ar1/Itga9/Ednrb/Gas6/Aif1/Calr	9
C8	GO:0002237	response to molecule of bacterial origin	10/98	389/23328	5.63e-06	0.000121551	7.12e-05	Mrc1/Cx3cr1/Pf4/Abca1/Cd36/Ednrb/Axl/Nr1h3/Slc11a1/Trem2	10
C8	GO:0030163	protein catabolic process	15/98	923/23328	6.92e-06	0.000146937	8.61e-05	Apoe/Ctsb/Dab2/Ctss/Hspa5/Lrp1/Ctsa/Hsp90b1/Wwp1/Cln8/Ctsl/Cst3/Tnfaip1/Trem2/Ctsd	15
C8	GO:0051017	actin filament bundle assembly	7/98	169/23328	7.35e-06	0.000153587	9e-05	Marcks/Itgb5/Hsp90b1/Mtss1/Aif1/Tgfbr1/Tnfaip1	7
C8	GO:0061572	actin filament bundle organization	7/98	172/23328	8.25e-06	0.000160349	9.4e-05	Marcks/Itgb5/Hsp90b1/Mtss1/Aif1/Tgfbr1/Tnfaip1	7
C8	GO:0035239	tube morphogenesis	15/98	937/23328	8.28e-06	0.000160349	9.4e-05	Apoe/Cx3cr1/Pf4/Stab1/C3ar1/Itgb1/Cd36/Jun/Rhob/Grn/Lrp1/Spred1/Plxnb2/Mtss1/Tgfbr1	15
C8	GO:0045765	regulation of angiogenesis	9/98	320/23328	8.3e-06	0.000160349	9.4e-05	Cx3cr1/Pf4/Stab1/C3ar1/Itgb1/Cd36/Rhob/Grn/Spred1	9
C8	GO:0051235	maintenance of location	9/98	320/23328	8.3e-06	0.000160349	9.4e-05	Apoe/Ftl1/Msr1/Lpl/Hspa5/Cd36/Nr1h3/Myo5a/Hexa	9
C8	GO:0071216	cellular response to biotic stimulus	9/98	320/23328	8.3e-06	0.000160349	9.4e-05	Mrc1/Cx3cr1/Pf4/Hspa5/Abca1/Cd36/Axl/Nr1h3/Trem2	9
C8	GO:0010942	positive regulation of cell death	13/98	715/23328	9.25e-06	0.000176243	0.000103289	Apoe/Egr1/Itgb1/Cd36/C1qa/Jun/Rhob/Grn/Bin1/Lrp1/Dusp6/Tgfbr1/Ctsd	13
C8	GO:0019882	antigen processing and presentation	6/98	116/23328	9.63e-06	0.000180673	0.000105885	Ctss/Slc11a1/Ctsl/Fcgr1/Calr/Trem2	6
C8	GO:0006935	chemotaxis	12/98	612/23328	9.93e-06	0.000183732	0.000107678	Cx3cr1/Csf1r/Pf4/C3ar1/Itga9/Ednrb/Lrp1/Gas6/Plxnb2/Aif1/Calr/Trem2	12
C8	GO:0055082	cellular chemical homeostasis	14/98	836/23328	1.03e-05	0.00018631	0.000109189	Apoe/Cx3cr1/Ftl1/C3ar1/Atp2b1/Slc40a1/Cd36/Ednrb/Grn/Lrp1/Gas6/Ckb/Slc11a1/Myo5a	14
C8	GO:0034976	response to endoplasmic reticulum stress	8/98	249/23328	1.04e-05	0.00018631	0.000109189	Hspa5/Ppp1r15a/Jun/Nr1h3/Hsp90b1/Pdia6/Uba5/Calr	8
C8	GO:0019725	cellular homeostasis	15/98	957/23328	1.06e-05	0.000188522	0.000110485	Apoe/Cx3cr1/Ftl1/C3ar1/Atp2b1/Slc40a1/Cd36/Ednrb/Grn/Lrp1/Gas6/Ckb/Pdia6/Slc11a1/Myo5a	15
C8	GO:0042330	taxis	12/98	617/23328	1.08e-05	0.000188522	0.000110485	Cx3cr1/Csf1r/Pf4/C3ar1/Itga9/Ednrb/Lrp1/Gas6/Plxnb2/Aif1/Calr/Trem2	12
C8	GO:0071396	cellular response to lipid	12/98	621/23328	1.15e-05	0.000198395	0.000116272	Mrc1/Cx3cr1/Pf4/Dab2/Lpl/Abca1/Cd36/Axl/Nr1h3/Uba5/Calr/Trem2	12
C8	GO:0043410	positive regulation of MAPK cascade	11/98	523/23328	1.25e-05	0.000212996	0.000124828	Apoe/Csf1r/Dab2/Cd36/Jun/Lrp1/Gas6/Tgfbr1/Rap1b/Trem2/Bank1	11
C8	GO:0009617	response to bacterium	15/98	974/23328	1.31e-05	0.000220393	0.000129163	Mrc1/Cx3cr1/Pf4/Stab1/Lpl/Abca1/Cd36/Ednrb/Grn/Axl/Nr1h3/Slc11a1/Fcgr1/Trem2/Bank1	15
C8	GO:0050730	regulation of peptidyl-tyrosine phosphorylation	8/98	263/23328	1.54e-05	0.000253727	0.000148699	Csf1r/Ehd4/Itgb1/Cd36/Gas6/Fcgr1/Trem2/Bank1	8
C8	GO:0007015	actin filament organization	10/98	437/23328	1.55e-05	0.000253727	0.000148699	Marcks/Itgb5/Rhob/Bin1/Hsp90b1/Mtss1/Aif1/Tgfbr1/Myo5a/Tnfaip1	10
C8	GO:0001525	angiogenesis	11/98	537/23328	1.6e-05	0.000258548	0.000151525	Cx3cr1/Pf4/Stab1/C3ar1/Itgb1/Cd36/Jun/Rhob/Grn/Spred1/Tgfbr1	11
C8	GO:0055080	cation homeostasis	13/98	755/23328	1.65e-05	0.000263197	0.000154249	Apoe/Cx3cr1/Ftl1/C3ar1/Atp2b1/Slc40a1/Cd36/Ednrb/Grn/Lrp1/Slc11a1/Mtss1/Myo5a	13
C8	GO:1905475	regulation of protein localization to membrane	7/98	195/23328	1.86e-05	0.000294345	0.000172504	Dab2/Itgb1/Lrp1/Cltc/Myo5a/Sqstm1/Trem2	7
C8	GO:0030003	cellular cation homeostasis	12/98	662/23328	2.16e-05	0.0003375	0.000197795	Apoe/Cx3cr1/Ftl1/C3ar1/Atp2b1/Slc40a1/Cd36/Ednrb/Grn/Lrp1/Slc11a1/Myo5a	12
C8	GO:0006869	lipid transport	9/98	364/23328	2.31e-05	0.000355366	0.000208265	Apoe/Msr1/Dab2/Abca1/Cd36/Lrp1/Abca9/Scarb2/Nr1h3	9
C8	GO:0010720	positive regulation of cell development	12/98	676/23328	2.66e-05	0.000404535	0.000237082	Apoe/Cx3cr1/Dab2/Hspa5/Itgb1/Grn/Bin1/Lrp1/Scarb2/Plxnb2/Calr/Trem2	12
C8	GO:0050727	regulation of inflammatory response	9/98	372/23328	2.73e-05	0.000407281	0.000238691	Apoe/Cx3cr1/Ctss/Lpl/Ednrb/Grn/Nr1h3/Fcgr1/Trem2	9
C8	GO:0071222	cellular response to lipopolysaccharide	8/98	285/23328	2.74e-05	0.000407281	0.000238691	Mrc1/Cx3cr1/Pf4/Abca1/Cd36/Axl/Nr1h3/Trem2	8
C8	GO:0055065	metal ion homeostasis	12/98	680/23328	2.81e-05	0.00041391	0.000242576	Apoe/Cx3cr1/Ftl1/C3ar1/Atp2b1/Slc40a1/Cd36/Ednrb/Lrp1/Slc11a1/Mtss1/Myo5a	12
C8	GO:0061024	membrane organization	13/98	803/23328	3.13e-05	0.000455366	0.000266872	Apoe/Msr1/Abca1/Itgb1/Cd36/Bin1/Gas6/Cln8/Fcgr1/Mtss1/Aif1/Tmed10/Trem2	13
C8	GO:0043542	endothelial cell migration	7/98	212/23328	3.19e-05	0.000458373	0.000268634	Apoe/Itgb1/Rhob/Grn/Spred1/Tgfbr1/Calr	7
C8	GO:0007167	enzyme linked receptor protein signaling pathway	14/98	928/23328	3.29e-05	0.00046769	0.000274094	Csf1r/Dab2/Egr1/Hspa5/Itgb5/Jun/Axl/Lrp1/Spred1/Gas6/Snx5/Tgfbr1/Hexa/Dok2	14
C8	GO:0007417	central nervous system development	14/98	930/23328	3.36e-05	0.000473598	0.000277557	Cx3cr1/Csf1r/Selenop/Marcks/Hspa5/Itgb1/C1qa/Grn/Bin1/Axl/Lrp1/Plxnb2/Cln8/Trem2	14
C8	GO:0010243	response to organonitrogen compound	14/98	932/23328	3.44e-05	0.000476532	0.000279276	Apoe/Lpl/Egr1/Hspa5/Atp2b1/Itgb1/Cd36/Ednrb/Lrp1/Hsp90b1/Snx5/Rap1b/Myo5a/Trem2	14
C8	GO:0010631	epithelial cell migration	8/98	295/23328	3.5e-05	0.000476532	0.000279276	Apoe/Itgb1/Jun/Rhob/Grn/Spred1/Tgfbr1/Calr	8
C8	GO:0071219	cellular response to molecule of bacterial origin	8/98	295/23328	3.5e-05	0.000476532	0.000279276	Mrc1/Cx3cr1/Pf4/Abca1/Cd36/Axl/Nr1h3/Trem2	8
C8	GO:0002521	leukocyte differentiation	11/98	586/23328	3.56e-05	0.00047964	0.000281098	C1qc/Csf1r/Pf4/Egr1/Jun/Axl/Gas6/Wwp1/Ctsl/Trem2/Dclre1c	11
C8	GO:0090132	epithelium migration	8/98	297/23328	3.67e-05	0.000488337	0.000286195	Apoe/Itgb1/Jun/Rhob/Grn/Spred1/Tgfbr1/Calr	8
C8	GO:0002685	regulation of leukocyte migration	7/98	217/23328	3.7e-05	0.000488337	0.000286195	Cx3cr1/Csf1r/C3ar1/Gas6/Aif1/Calr/Trem2	7
C8	GO:0090130	tissue migration	8/98	299/23328	3.85e-05	0.000503015	0.000294797	Apoe/Itgb1/Jun/Rhob/Grn/Spred1/Tgfbr1/Calr	8
C8	GO:0050921	positive regulation of chemotaxis	6/98	149/23328	3.98e-05	0.000515936	0.000302369	Csf1r/C3ar1/Gas6/Aif1/Calr/Trem2	6
C8	GO:0006875	cellular metal ion homeostasis	11/98	596/23328	4.14e-05	0.000531394	0.000311429	Apoe/Cx3cr1/Ftl1/C3ar1/Atp2b1/Slc40a1/Cd36/Ednrb/Lrp1/Slc11a1/Myo5a	11
C8	GO:0009611	response to wounding	10/98	492/23328	4.24e-05	0.000538238	0.00031544	Apoe/Pf4/Itgb1/Cd36/Jun/Grn/Axl/Lrp1/Gas6/Slc11a1	10
C8	GO:1901652	response to peptide	9/98	400/23328	4.8e-05	0.000603783	0.000353853	Lpl/Egr1/Atp2b1/Cd36/Ednrb/Lrp1/Snx5/Myo5a/Trem2	9
C8	GO:0032675	regulation of interleukin-6 production	6/98	156/23328	5.15e-05	0.000641154	0.000375755	Lpl/Cd36/Gas6/Aif1/Trem2/Bank1	6
C8	GO:0018108	peptidyl-tyrosine phosphorylation	8/98	322/23328	6.47e-05	0.000798413	0.000467918	Csf1r/Ehd4/Itgb1/Cd36/Gas6/Fcgr1/Trem2/Bank1	8
C8	GO:0007041	lysosomal transport	5/98	101/23328	6.8e-05	0.000827461	0.000484942	Rhob/Grn/Bin1/Lrp1/Scarb2	5
C8	GO:0048871	multicellular organismal homeostasis	10/98	521/23328	6.84e-05	0.000827461	0.000484942	Csf1r/Ctss/Egr1/Slc40a1/Itgb1/Cd36/Ednrb/Nr1h3/Cln8/Slc11a1	10
C8	GO:0018212	peptidyl-tyrosine modification	8/98	325/23328	6.91e-05	0.000828139	0.000485339	Csf1r/Ehd4/Itgb1/Cd36/Gas6/Fcgr1/Trem2/Bank1	8
C8	GO:0051271	negative regulation of cellular component movement	8/98	326/23328	7.06e-05	0.000838307	0.000491298	Apoe/Cx3cr1/Rhob/Bin1/Lrp1/Spred1/Aif1/Calr	8
C8	GO:0051896	regulation of protein kinase B signaling	6/98	166/23328	7.27e-05	0.000855963	0.000501645	Cx3cr1/Itgb1/Axl/Gas6/Tgfbr1/Bank1	6
C8	GO:0032635	interleukin-6 production	6/98	167/23328	7.52e-05	0.000876906	0.00051392	Lpl/Cd36/Gas6/Aif1/Trem2/Bank1	6
C8	GO:0072507	divalent inorganic cation homeostasis	10/98	528/23328	7.64e-05	0.000882878	0.000517419	Apoe/Cx3cr1/C3ar1/Atp2b1/Cd36/Ednrb/Lrp1/Slc11a1/Mtss1/Myo5a	10
C8	GO:0001667	ameboidal-type cell migration	9/98	427/23328	7.92e-05	0.000908078	0.000532188	Apoe/Itgb1/Jun/Ednrb/Rhob/Grn/Spred1/Tgfbr1/Calr	9
C8	GO:0007179	transforming growth factor beta receptor signaling pathway	6/98	169/23328	8.03e-05	0.000911887	0.00053442	Dab2/Hspa5/Itgb5/Jun/Spred1/Tgfbr1	6
C8	GO:0015850	organic hydroxy compound transport	7/98	249/23328	8.79e-05	0.000989976	0.000580185	Apoe/Msr1/Dab2/Abca1/Cd36/Lrp1/Nr1h3	7
C8	GO:0044257	cellular protein catabolic process	12/98	769/23328	9.16e-05	0.0010224	0.00059919	Apoe/Ctsb/Dab2/Ctss/Hspa5/Lrp1/Hsp90b1/Wwp1/Cln8/Ctsl/Tnfaip1/Trem2	12
C8	GO:0051897	positive regulation of protein kinase B signaling	5/98	109/23328	9.76e-05	0.00107151	0.000627968	Cx3cr1/Itgb1/Axl/Gas6/Tgfbr1	5
C8	GO:1905477	positive regulation of protein localization to membrane	5/98	109/23328	9.76e-05	0.00107151	0.000627968	Itgb1/Lrp1/Myo5a/Sqstm1/Trem2	5
C8	GO:1902107	positive regulation of leukocyte differentiation	6/98	180/23328	0.000113559	0.00123579	0.000724244	Csf1r/Pf4/Jun/Axl/Gas6/Trem2	6
C8	GO:0001818	negative regulation of cytokine production	7/98	260/23328	0.000115026	0.00124091	0.000727249	Cx3cr1/Atp2b1/Axl/Gas6/Slc11a1/Trem2/Bank1	7
C8	GO:0001819	positive regulation of cytokine production	9/98	449/23328	0.000115946	0.00124091	0.000727249	Pf4/C3ar1/Lpl/Egr1/Cd36/Lrp1/Slc11a1/Aif1/Trem2	9
C8	GO:0031589	cell-substrate adhesion	8/98	351/23328	0.000117702	0.00124938	0.000732209	Dab2/Itgb5/Itgb1/Cd36/Axl/Lrp1/Gas6/Calr	8
C8	GO:0043524	negative regulation of neuron apoptotic process	6/98	182/23328	0.000120642	0.00127017	0.000744396	Apoe/Cx3cr1/Jun/Grn/Axl/Lrp1	6
C8	GO:0043523	regulation of neuron apoptotic process	7/98	270/23328	0.000145238	0.0015168	0.000888934	Apoe/Cx3cr1/Egr1/Jun/Grn/Axl/Lrp1	7
C8	GO:0032680	regulation of tumor necrosis factor production	5/98	120/23328	0.000153582	0.0015819	0.000927085	Pf4/Cd36/Axl/Gas6/Trem2	5
C8	GO:1901699	cellular response to nitrogen compound	11/98	691/23328	0.000153914	0.0015819	0.000927085	Lpl/Egr1/Atp2b1/Cd36/Lrp1/Hsp90b1/Snx5/Rap1b/Myo5a/Trem2/Rgs10	11
C8	GO:0009725	response to hormone	11/98	692/23328	0.000155862	0.0015893	0.000931423	Dab2/Lpl/Egr1/Atp2b1/Ednrb/Nr1h3/Snx5/Tgfbr1/Uba5/Myo5a/Calr	11
C8	GO:0002688	regulation of leukocyte chemotaxis	5/98	121/23328	0.000159674	0.00160293	0.000939411	Csf1r/C3ar1/Gas6/Aif1/Calr	5
C8	GO:1901136	carbohydrate derivative catabolic process	5/98	121/23328	0.000159674	0.00160293	0.000939411	Lyve1/Ctsl/Galc/Hexa/Cst3	5
C8	GO:0007178	transmembrane receptor protein serine/threonine kinase signaling pathway	8/98	368/23328	0.000162724	0.00161581	0.000946963	Dab2/Egr1/Hspa5/Itgb5/Jun/Spred1/Tgfbr1/Hexa	8
C8	GO:0019221	cytokine-mediated signaling pathway	8/98	369/23328	0.000165762	0.00161581	0.000946963	Cx3cr1/Csf1r/Pf4/Egr1/Ifngr2/Axl/Gas6/Trem2	8
C8	GO:0016525	negative regulation of angiogenesis	5/98	122/23328	0.000165948	0.00161581	0.000946963	Cx3cr1/Pf4/Stab1/Cd36/Spred1	5
C8	GO:1903555	regulation of tumor necrosis factor superfamily cytokine production	5/98	122/23328	0.000165948	0.00161581	0.000946963	Pf4/Cd36/Axl/Gas6/Trem2	5
C8	GO:0008285	negative regulation of cell population proliferation	11/98	699/23328	0.000170091	0.00164379	0.00096336	Apoe/Csf1r/Dab2/Hpgds/Itgb1/Jun/Ctsl/Mtss1/Aif1/Tgfbr1/H19	11
C8	GO:0030336	negative regulation of cell migration	7/98	278/23328	0.000173789	0.00166045	0.000973124	Apoe/Cx3cr1/Rhob/Lrp1/Spred1/Aif1/Calr	7
C8	GO:0050678	regulation of epithelial cell proliferation	8/98	372/23328	0.000175156	0.00166045	0.000973124	Apoe/Dab2/Jun/Ednrb/Grn/Ctsl/Mtss1/Tgfbr1	8
C8	GO:0030097	hemopoiesis	13/98	953/23328	0.000175662	0.00166045	0.000973124	C1qc/Csf1r/Pf4/Dab2/Egr1/Jun/Axl/Gas6/Wwp1/Ctsl/Uba5/Trem2/Dclre1c	13
C8	GO:0043491	protein kinase B signaling	6/98	196/23328	0.00018062	0.00169244	0.000991871	Cx3cr1/Itgb1/Axl/Gas6/Tgfbr1/Bank1	6
C8	GO:0044403	symbiotic process	8/98	374/23328	0.00018166	0.00169244	0.000991871	Apoe/Ctsb/Csf1r/Pf4/Jun/Axl/Gas6/Hacd3	8
C8	GO:0006911	phagocytosis, engulfment	6/98	197/23328	0.000185668	0.00171743	0.00100652	Msr1/Abca1/Cd36/Fcgr1/Aif1/Trem2	6
C8	GO:1901214	regulation of neuron death	8/98	377/23328	0.000191787	0.00173332	0.00101583	Apoe/Cx3cr1/Egr1/C1qa/Jun/Grn/Axl/Lrp1	8
C8	GO:0032640	tumor necrosis factor production	5/98	126/23328	0.000192951	0.00173332	0.00101583	Pf4/Cd36/Axl/Gas6/Trem2	5
C8	GO:1901216	positive regulation of neuron death	5/98	126/23328	0.000192951	0.00173332	0.00101583	Apoe/Egr1/C1qa/Jun/Grn	5
C8	GO:2000181	negative regulation of blood vessel morphogenesis	5/98	126/23328	0.000192951	0.00173332	0.00101583	Cx3cr1/Pf4/Stab1/Cd36/Spred1	5
C8	GO:0050769	positive regulation of neurogenesis	10/98	592/23328	0.000194079	0.00173332	0.00101583	Apoe/Cx3cr1/Hspa5/Itgb1/Grn/Bin1/Lrp1/Scarb2/Plxnb2/Trem2	10
C8	GO:0071706	tumor necrosis factor superfamily cytokine production	5/98	128/23328	0.000207647	0.0018418	0.00107941	Pf4/Cd36/Axl/Gas6/Trem2	5
C8	GO:0022411	cellular component disassembly	8/98	383/23328	0.000213438	0.00188028	0.00110196	C1qc/C1qb/Ctss/C1qa/Tgfbr1/Uba5/Sqstm1/Trem2	8
C8	GO:0032368	regulation of lipid transport	5/98	130/23328	0.000223182	0.00194589	0.00114041	Apoe/Dab2/Abca1/Lrp1/Nr1h3	5
C8	GO:0050767	regulation of neurogenesis	13/98	977/23328	0.00022389	0.00194589	0.00114041	Apoe/Cx3cr1/Dab2/Hspa5/Itgb1/Ednrb/Grn/Bin1/Lrp1/Scarb2/Plxnb2/Calr/Trem2	13
C8	GO:2000146	negative regulation of cell motility	7/98	291/23328	0.000229751	0.00198344	0.00116241	Apoe/Cx3cr1/Rhob/Lrp1/Spred1/Aif1/Calr	7
C8	GO:0002761	regulation of myeloid leukocyte differentiation	5/98	131/23328	0.000231274	0.00198344	0.00116241	C1qc/Csf1r/Pf4/Jun/Trem2	5
C8	GO:0099024	plasma membrane invagination	6/98	206/23328	0.000236307	0.00201328	0.0011799	Msr1/Abca1/Cd36/Fcgr1/Aif1/Trem2	6
C8	GO:0071560	cellular response to transforming growth factor beta stimulus	6/98	208/23328	0.000248911	0.00209312	0.00122669	Dab2/Hspa5/Itgb5/Jun/Spred1/Tgfbr1	6
C8	GO:1904018	positive regulation of vasculature development	6/98	208/23328	0.000248911	0.00209312	0.00122669	Cx3cr1/C3ar1/Egr1/Itgb1/Rhob/Grn	6
C8	GO:0051402	neuron apoptotic process	7/98	298/23328	0.000265422	0.00220958	0.00129494	Apoe/Cx3cr1/Egr1/Jun/Grn/Axl/Lrp1	7
C8	GO:0008284	positive regulation of cell population proliferation	13/98	996/23328	0.000269763	0.00220958	0.00129494	Cx3cr1/Csf1r/C3ar1/Egr1/Itgb1/Jun/Ednrb/Grn/Gas6/Aif1/Tgfbr1/Calr/Cst3	13
C8	GO:0072503	cellular divalent inorganic cation homeostasis	9/98	503/23328	0.000269964	0.00220958	0.00129494	Apoe/Cx3cr1/C3ar1/Atp2b1/Cd36/Ednrb/Lrp1/Slc11a1/Myo5a	9
C8	GO:1901653	cellular response to peptide	7/98	299/23328	0.000270863	0.00220958	0.00129494	Lpl/Atp2b1/Cd36/Lrp1/Snx5/Myo5a/Trem2	7
C8	GO:0098655	cation transmembrane transport	11/98	738/23328	0.000271292	0.00220958	0.00129494	Ctss/Atp2b1/Slc40a1/Itgb1/Slc43a2/Bin1/Ifngr2/Gas6/Slc11a1/Myo5a/Trem2	11
C8	GO:0043112	receptor metabolic process	6/98	212/23328	0.000275705	0.00221763	0.00129966	Apoe/Dab2/Itgb1/Cd36/Cltc/Nr1h3	6
C8	GO:0071559	response to transforming growth factor beta	6/98	212/23328	0.000275705	0.00221763	0.00129966	Dab2/Hspa5/Itgb5/Jun/Spred1/Tgfbr1	6
C8	GO:0007610	behavior	11/98	741/23328	0.000280836	0.00224496	0.00131568	Apoe/Cx3cr1/Selenop/Egr1/Itgb1/Cd36/Jun/Grn/Cln8/Myo5a/Hexa	11
C8	GO:0010324	membrane invagination	6/98	213/23328	0.000282745	0.00224635	0.00131649	Msr1/Abca1/Cd36/Fcgr1/Aif1/Trem2	6
C8	GO:0071417	cellular response to organonitrogen compound	10/98	624/23328	0.000295409	0.00233265	0.00136707	Lpl/Egr1/Atp2b1/Cd36/Lrp1/Hsp90b1/Snx5/Rap1b/Myo5a/Trem2	10
C8	GO:1901343	negative regulation of vasculature development	5/98	139/23328	0.000304317	0.00238843	0.00139976	Cx3cr1/Pf4/Stab1/Cd36/Spred1	5
C8	GO:0031668	cellular response to extracellular stimulus	6/98	217/23328	0.00031233	0.00241446	0.00141502	Lpl/Hspa5/Jun/Axl/Gas6/Rnase4	6
C8	GO:0007034	vacuolar transport	5/98	140/23328	0.000314549	0.00241446	0.00141502	Rhob/Grn/Bin1/Lrp1/Scarb2	5
C8	GO:0045087	innate immune response	12/98	879/23328	0.000315092	0.00241446	0.00141502	Apoe/Mrc1/C1qc/Cx3cr1/Csf1r/C1qb/C1qa/Grn/Axl/Slc11a1/Fcgr1/Trem2	12
C8	GO:0051338	regulation of transferase activity	12/98	879/23328	0.000315092	0.00241446	0.00141502	Apoe/Csf1r/Dab2/Egr1/Axl/Spred1/Gas6/Cln8/Slc11a1/Fcgr1/Dusp6/Tgfbr1	12
C8	GO:0016032	viral process	7/98	309/23328	0.000330376	0.00249812	0.00146405	Apoe/Ctsb/Csf1r/Jun/Axl/Gas6/Hacd3	7
C8	GO:1902105	regulation of leukocyte differentiation	7/98	309/23328	0.000330376	0.00249812	0.00146405	C1qc/Csf1r/Pf4/Jun/Axl/Gas6/Trem2	7
C8	GO:0006979	response to oxidative stress	8/98	409/23328	0.000331796	0.00249812	0.00146405	Apoe/Cd36/Jun/Rhob/Axl/Cln8/Aif1/Cst3	8
C8	GO:0006633	fatty acid biosynthetic process	5/98	145/23328	0.000369672	0.00273335	0.00160191	Lpl/Hpgds/Nr1h3/Myo5a/Hacd3	5
C8	GO:0050920	regulation of chemotaxis	6/98	224/23328	0.000369903	0.00273335	0.00160191	Csf1r/C3ar1/Gas6/Aif1/Calr/Trem2	6
C8	GO:1903708	positive regulation of hemopoiesis	6/98	224/23328	0.000369903	0.00273335	0.00160191	Csf1r/Pf4/Jun/Axl/Gas6/Trem2	6
C8	GO:0070997	neuron death	8/98	416/23328	0.000371483	0.00273335	0.00160191	Apoe/Cx3cr1/Egr1/C1qa/Jun/Grn/Axl/Lrp1	8
C8	GO:0043549	regulation of kinase activity	11/98	769/23328	0.000384473	0.00281295	0.00164856	Apoe/Csf1r/Dab2/Egr1/Axl/Spred1/Gas6/Slc11a1/Fcgr1/Dusp6/Tgfbr1	11
C8	GO:0050680	negative regulation of epithelial cell proliferation	5/98	148/23328	0.000406076	0.00295432	0.00173141	Apoe/Dab2/Ctsl/Mtss1/Tgfbr1	5
C8	GO:0040013	negative regulation of locomotion	7/98	326/23328	0.000455316	0.00329405	0.00193051	Apoe/Cx3cr1/Rhob/Lrp1/Spred1/Aif1/Calr	7
C8	GO:0050729	positive regulation of inflammatory response	5/98	152/23328	0.000458751	0.00330046	0.00193426	Ctss/Lpl/Grn/Fcgr1/Trem2	5
C8	GO:0010632	regulation of epithelial cell migration	6/98	235/23328	0.000476819	0.0034115	0.00199934	Apoe/Jun/Rhob/Grn/Spred1/Calr	6
C8	GO:0045664	regulation of neuron differentiation	11/98	793/23328	0.000497349	0.0035265	0.00206674	Apoe/Dab2/Hspa5/Itgb1/Ednrb/Grn/Bin1/Lrp1/Scarb2/Plxnb2/Calr	11
C8	GO:0051962	positive regulation of nervous system development	10/98	667/23328	0.000498339	0.0035265	0.00206674	Apoe/Cx3cr1/Hspa5/Itgb1/Grn/Bin1/Lrp1/Scarb2/Plxnb2/Trem2	10
C8	GO:0050673	epithelial cell proliferation	8/98	438/23328	0.000522149	0.00367491	0.00215371	Apoe/Dab2/Jun/Ednrb/Grn/Ctsl/Mtss1/Tgfbr1	8
C8	GO:0006886	intracellular protein transport	12/98	932/23328	0.000532067	0.00371928	0.00217972	Hspa5/Itgb1/Cd36/Rhob/Gas6/Cltc/Scarb2/Hsp90b1/Snx5/Myo5a/Calr/Tmed10	12
C8	GO:0045859	regulation of protein kinase activity	10/98	673/23328	0.000534198	0.00371928	0.00217972	Apoe/Csf1r/Dab2/Egr1/Spred1/Gas6/Slc11a1/Fcgr1/Dusp6/Tgfbr1	10
C8	GO:0034220	ion transmembrane transport	12/98	937/23328	0.00055785	0.00386319	0.00226406	Ctss/Atp2b1/Slc40a1/Itgb1/Slc43a2/Bin1/Ifngr2/Gas6/Cln8/Slc11a1/Myo5a/Trem2	12
C8	GO:0042063	gliogenesis	7/98	338/23328	0.000564319	0.0038872	0.00227813	Cx3cr1/Csf1r/C1qa/Grn/Bin1/Lrp1/Trem2	7
C8	GO:0019932	second-messenger-mediated signaling	8/98	445/23328	0.000579334	0.00396951	0.00232637	Apoe/Cx3cr1/Pf4/Abca1/Cd36/Ednrb/Myo5a/Trem2	8
C8	GO:1901215	negative regulation of neuron death	6/98	251/23328	0.000673708	0.00456865	0.0026775	Apoe/Cx3cr1/Jun/Grn/Axl/Lrp1	6
C8	GO:0042060	wound healing	7/98	349/23328	0.000681614	0.00456865	0.0026775	Apoe/Pf4/Itgb1/Cd36/Axl/Gas6/Slc11a1	7
C8	GO:0032940	secretion by cell	12/98	959/23328	0.000684194	0.00456865	0.0026775	Apoe/Dab2/Abca1/Cd36/Axl/Lrp1/Nr1h3/Rab3il1/Rap1b/Myo5a/Tmed10/Trem2	12
C8	GO:0007596	blood coagulation	5/98	166/23328	0.000684415	0.00456865	0.0026775	Apoe/Pf4/Cd36/Axl/Gas6	5
C8	GO:0010594	regulation of endothelial cell migration	5/98	166/23328	0.000684415	0.00456865	0.0026775	Apoe/Rhob/Grn/Spred1/Calr	5
C8	GO:1903827	regulation of cellular protein localization	9/98	573/23328	0.000691779	0.00459412	0.00269243	Dab2/Itgb1/Cd36/Lrp1/Gas6/Cltc/Myo5a/Sqstm1/Trem2	9
C8	GO:0007599	hemostasis	5/98	168/23328	0.000722408	0.00477305	0.00279729	Apoe/Pf4/Cd36/Axl/Gas6	5
C8	GO:0050878	regulation of body fluid levels	7/98	354/23328	0.000740954	0.00485288	0.00284408	Apoe/Pf4/Cd36/Ednrb/Axl/Gas6/Nr1h3	7
C8	GO:0050817	coagulation	5/98	169/23328	0.000741985	0.00485288	0.00284408	Apoe/Pf4/Cd36/Axl/Gas6	5
C8	GO:0015711	organic anion transport	8/98	463/23328	0.000749982	0.00488053	0.00286028	Apoe/Abca1/Itgb1/Cd36/Slc43a2/Scarb2/Cln8/Slc11a1	8
C8	GO:0007626	locomotory behavior	6/98	258/23328	0.000777445	0.00503395	0.0029502	Apoe/Selenop/Egr1/Cln8/Myo5a/Hexa	6
C8	GO:0045665	negative regulation of neuron differentiation	6/98	259/23328	0.000793218	0.00511054	0.00299508	Apoe/Dab2/Itgb1/Ednrb/Lrp1/Calr	6
C8	GO:0043409	negative regulation of MAPK cascade	5/98	173/23328	0.000824285	0.00526718	0.00308688	Apoe/Dab2/Spred1/Dusp6/Dok2	5
C8	GO:0032956	regulation of actin cytoskeleton organization	7/98	361/23328	0.000830835	0.00526718	0.00308688	Csf1r/Rhob/Bin1/Lrp1/Ctsl/Mtss1/Tgfbr1	7
C8	GO:1904062	regulation of cation transmembrane transport	7/98	361/23328	0.000830835	0.00526718	0.00308688	Ctss/Itgb1/Slc43a2/Bin1/Ifngr2/Myo5a/Trem2	7
C8	GO:0044255	cellular lipid metabolic process	12/98	981/23328	0.000833801	0.00526718	0.00308688	Apoe/Csf1r/Lpl/Hpgds/Cd36/Lrp1/Nr1h3/Cln8/Galc/Myo5a/Hexa/Hacd3	12
C8	GO:0050776	regulation of immune response	11/98	845/23328	0.000839488	0.00527737	0.00309285	Apoe/C1qc/C1qb/C3ar1/Cd36/C1qa/Grn/Slc11a1/Fcgr1/Trem2/Fyb	11
C8	GO:0007033	vacuole organization	5/98	174/23328	0.000845883	0.00529188	0.00310136	Abca1/Grn/Cln8/Hexa/Ctsd	5
C8	GO:2001237	negative regulation of extrinsic apoptotic signaling pathway	4/98	101/23328	0.000875379	0.00545008	0.00319407	Cx3cr1/Pf4/Dab2/Tgfbr1	4
C8	GO:2001257	regulation of cation channel activity	5/98	176/23328	0.000890342	0.00547804	0.00321046	Ctss/Itgb1/Ifngr2/Myo5a/Trem2	5
C8	GO:0031347	regulation of defense response	9/98	594/23328	0.000891881	0.00547804	0.00321046	Apoe/Cx3cr1/Ctss/Lpl/Ednrb/Grn/Nr1h3/Fcgr1/Trem2	9
C8	GO:0051603	proteolysis involved in cellular protein catabolic process	10/98	720/23328	0.00089633	0.00547804	0.00321046	Apoe/Ctsb/Dab2/Ctss/Hspa5/Hsp90b1/Wwp1/Ctsl/Tnfaip1/Trem2	10
C8	GO:0006874	cellular calcium ion homeostasis	8/98	476/23328	0.000896791	0.00547804	0.00321046	Apoe/Cx3cr1/C3ar1/Atp2b1/Cd36/Ednrb/Lrp1/Myo5a	8
C8	GO:0031346	positive regulation of cell projection organization	8/98	478/23328	0.000921297	0.00559131	0.00327684	Apoe/Hspa5/Itgb1/Grn/Lrp1/Scarb2/Plxnb2/Tgfbr1	8
C8	GO:0044283	small molecule biosynthetic process	9/98	597/23328	0.000923969	0.00559131	0.00327684	Apoe/Dab2/Lpl/Egr1/Hpgds/Cltc/Nr1h3/Myo5a/Hacd3	9
C8	GO:0050808	synapse organization	8/98	479/23328	0.000933749	0.00562421	0.00329612	Apoe/C1qc/Cx3cr1/C1qb/C1qa/Plxnb2/Myo5a/Trem2	8
C8	GO:0032880	regulation of protein localization	12/98	995/23328	0.000942595	0.00565121	0.00331194	Apoe/Dab2/Itgb1/Cd36/Lrp1/Gas6/Cltc/Nr1h3/Myo5a/Sqstm1/Trem2/Ctsd	12
C8	GO:0030162	regulation of proteolysis	10/98	727/23328	0.000964448	0.00575558	0.00337311	Apoe/Dab2/Grn/Bin1/Gas6/Nr1h3/Serpinb6a/Cst3/Trem2/Ctsd	10
C8	GO:0010976	positive regulation of neuron projection development	7/98	372/23328	0.000989292	0.00587676	0.00344413	Apoe/Hspa5/Itgb1/Grn/Lrp1/Scarb2/Plxnb2	7
C8	GO:0007266	Rho protein signal transduction	5/98	181/23328	0.0010091	0.00596706	0.00349705	Apoe/Abca1/Itgb1/Tnfaip1/Hacd3	5
C8	GO:0051480	regulation of cytosolic calcium ion concentration	7/98	375/23328	0.00103639	0.00610059	0.00357531	Cx3cr1/C3ar1/Atp2b1/Cd36/Ednrb/Lrp1/Myo5a	7
C8	GO:0014812	muscle cell migration	4/98	106/23328	0.00104819	0.00614211	0.00359964	Egr1/Lrp1/Aif1/Myo5a	4
C8	GO:0009991	response to extracellular stimulus	7/98	378/23328	0.00108525	0.0063306	0.00371011	Apoe/Lpl/Hspa5/Jun/Axl/Gas6/Rnase4	7
C8	GO:0071363	cellular response to growth factor stimulus	9/98	613/23328	0.00111139	0.00640982	0.00375654	Dab2/Egr1/Hspa5/Ehd4/Itgb5/Jun/Spred1/Gas6/Tgfbr1	9
C8	GO:0055074	calcium ion homeostasis	8/98	493/23328	0.00112275	0.00640982	0.00375654	Apoe/Cx3cr1/C3ar1/Atp2b1/Cd36/Ednrb/Lrp1/Myo5a	8
C8	GO:0006641	triglyceride metabolic process	4/98	108/23328	0.00112357	0.00640982	0.00375654	Apoe/Lpl/Cd36/Nr1h3	4
C8	GO:0045639	positive regulation of myeloid cell differentiation	4/98	108/23328	0.00112357	0.00640982	0.00375654	Csf1r/Pf4/Jun/Trem2	4
C8	GO:0048661	positive regulation of smooth muscle cell proliferation	4/98	108/23328	0.00112357	0.00640982	0.00375654	C3ar1/Egr1/Jun/Aif1	4
C8	GO:1903034	regulation of response to wounding	5/98	186/23328	0.00113925	0.00647074	0.00379224	Apoe/Itgb1/Cd36/Grn/Lrp1	5
C8	GO:0044057	regulation of system process	9/98	617/23328	0.00116276	0.00657545	0.00385361	Apoe/Dab2/Ctss/Atp2b1/Ednrb/Bin1/Gas6/Nr1h3/Aif1	9
C8	GO:0032409	regulation of transporter activity	6/98	280/23328	0.00118549	0.00659747	0.00386651	Ctss/Itgb1/Ifngr2/Cttnbp2nl/Myo5a/Trem2	6
C8	GO:0071496	cellular response to external stimulus	6/98	280/23328	0.00118549	0.00659747	0.00386651	Lpl/Hspa5/Jun/Axl/Gas6/Rnase4	6
C8	GO:0010770	positive regulation of cell morphogenesis involved in differentiation	5/98	188/23328	0.00119465	0.00659747	0.00386651	Apoe/Dab2/Lrp1/Plxnb2/Calr	5
C8	GO:0031669	cellular response to nutrient levels	5/98	188/23328	0.00119465	0.00659747	0.00386651	Lpl/Hspa5/Jun/Gas6/Rnase4	5
C8	GO:0045766	positive regulation of angiogenesis	5/98	188/23328	0.00119465	0.00659747	0.00386651	Cx3cr1/C3ar1/Itgb1/Rhob/Grn	5
C8	GO:1901615	organic hydroxy compound metabolic process	8/98	498/23328	0.00119722	0.00659747	0.00386651	Apoe/Ctsb/Dab2/Abca1/Lrp1/Cln8/Ctsl/Myo5a	8
C8	GO:0035967	cellular response to topologically incorrect protein	4/98	110/23328	0.00120268	0.00659948	0.00386769	Hspa5/Ppp1r15a/Pdia6/Calr	4
C8	GO:0032963	collagen metabolic process	4/98	111/23328	0.00124367	0.00679557	0.00398261	Ctsb/Ctss/Itgb1/Ctsl	4
C8	GO:0070848	response to growth factor	9/98	626/23328	0.00128542	0.00699419	0.00409901	Dab2/Egr1/Hspa5/Ehd4/Itgb5/Jun/Spred1/Gas6/Tgfbr1	9
C8	GO:0042176	regulation of protein catabolic process	7/98	395/23328	0.00139734	0.00757135	0.00443727	Apoe/Dab2/Lrp1/Ctsa/Wwp1/Cst3/Trem2	7
C8	GO:0033674	positive regulation of kinase activity	8/98	511/23328	0.00140948	0.0076053	0.00445716	Csf1r/Dab2/Egr1/Axl/Gas6/Slc11a1/Fcgr1/Tgfbr1	8
C8	GO:0072330	monocarboxylic acid biosynthetic process	5/98	196/23328	0.00143637	0.00771828	0.00452337	Lpl/Hpgds/Nr1h3/Myo5a/Hacd3	5
C8	GO:1902532	negative regulation of intracellular signal transduction	8/98	513/23328	0.00144464	0.00773059	0.00453059	Apoe/Dab2/Itgb1/Spred1/Dusp6/Tnfaip1/Dok2/Bank1	8
C8	GO:0006986	response to unfolded protein	4/98	117/23328	0.00151031	0.0080488	0.00471708	Hspa5/Ppp1r15a/Pdia6/Calr	4
C8	GO:0014070	response to organic cyclic compound	10/98	773/23328	0.00152594	0.00809876	0.00474636	Dab2/Egr1/Cd36/Grn/Nr1h3/Hsp90b1/Tgfbr1/Uba5/Rap1b/Calr	10
C8	GO:0002252	immune effector process	11/98	912/23328	0.00154957	0.00819058	0.00480017	C1qc/Cx3cr1/C1qb/Cd36/C1qa/Grn/Ifngr2/Lrp1/Slc11a1/Fcgr1/Trem2	11
C8	GO:0021782	glial cell development	4/98	118/23328	0.00155833	0.00820339	0.00480768	C1qa/Grn/Lrp1/Trem2	4
C8	GO:0043065	positive regulation of apoptotic process	9/98	645/23328	0.00157884	0.0082777	0.00485122	Egr1/Itgb1/Jun/Rhob/Grn/Bin1/Dusp6/Tgfbr1/Ctsd	9
C8	GO:0051345	positive regulation of hydrolase activity	8/98	524/23328	0.00165069	0.00857408	0.00502492	Ppp1r15a/Itgb1/Grn/Bin1/Nr1h3/Dynll2/Ctsd/Rgs10	8
C8	GO:0007611	learning or memory	6/98	299/23328	0.00165523	0.00857408	0.00502492	Apoe/Cx3cr1/Egr1/Itgb1/Jun/Cln8	6
C8	GO:0046394	carboxylic acid biosynthetic process	6/98	299/23328	0.00165523	0.00857408	0.00502492	Lpl/Hpgds/Cltc/Nr1h3/Myo5a/Hacd3	6
C8	GO:0043068	positive regulation of programmed cell death	9/98	650/23328	0.0016644	0.00858722	0.00503262	Egr1/Itgb1/Jun/Rhob/Grn/Bin1/Dusp6/Tgfbr1/Ctsd	9
C8	GO:0016053	organic acid biosynthetic process	6/98	300/23328	0.00168337	0.00865063	0.00506979	Lpl/Hpgds/Cltc/Nr1h3/Myo5a/Hacd3	6
C8	GO:0010256	endomembrane system organization	7/98	410/23328	0.00172744	0.00877271	0.00514133	Abca1/Bin1/Cltc/Mtss1/Myo5a/Tmed10/Sqstm1	7
C8	GO:0032970	regulation of actin filament-based process	7/98	410/23328	0.00172744	0.00877271	0.00514133	Csf1r/Rhob/Bin1/Lrp1/Ctsl/Mtss1/Tgfbr1	7
C8	GO:0034248	regulation of cellular amide metabolic process	7/98	410/23328	0.00172744	0.00877271	0.00514133	Apoe/Ppp1r15a/Bin1/Plxnb2/Calr/Tmed10/Bank1	7
C8	GO:0003158	endothelium development	4/98	122/23328	0.00176103	0.00890835	0.00522082	Slc40a1/Rhob/Tgfbr1/Rap1b	4
C8	GO:0000122	negative regulation of transcription by RNA polymerase II	11/98	931/23328	0.00182296	0.00916023	0.00536844	Maf/Dab2/Egr1/Ppp1r15a/Cd36/Jun/Ednrb/Nr1h3/Tgfbr1/Calr/Sqstm1	11
C8	GO:0030099	myeloid cell differentiation	7/98	414/23328	0.00182497	0.00916023	0.00536844	C1qc/Csf1r/Pf4/Dab2/Jun/Uba5/Trem2	7
C8	GO:0008217	regulation of blood pressure	5/98	209/23328	0.00190359	0.00951795	0.00557809	C3ar1/Atp2b1/Cd36/Ednrb/Gas6	5
C8	GO:0120035	regulation of plasma membrane bounded cell projection organization	10/98	798/23328	0.00192835	0.00960469	0.00562892	Apoe/Dab2/Hspa5/Itgb1/Grn/Lrp1/Scarb2/Plxnb2/Tgfbr1/Trem2	10
C8	GO:0050866	negative regulation of cell activation	5/98	210/23328	0.00194363	0.00964367	0.00565177	Apoe/Grn/Axl/Nr1h3/Bank1	5
C8	GO:0008202	steroid metabolic process	6/98	309/23328	0.00195331	0.0096547	0.00565823	Apoe/Dab2/Egr1/Abca1/Lrp1/Cln8	6
C8	GO:0071621	granulocyte chemotaxis	4/98	126/23328	0.00198136	0.00975611	0.00571766	Csf1r/Pf4/C3ar1/Itga9	4
C8	GO:0045596	negative regulation of cell differentiation	10/98	806/23328	0.00207392	0.0101732	0.0059621	Apoe/C1qc/Pf4/Dab2/Itgb1/Ednrb/Lrp1/Spred1/Tgfbr1/Calr	10
C8	GO:1903706	regulation of hemopoiesis	7/98	424/23328	0.00208758	0.0101775	0.0059646	C1qc/Csf1r/Pf4/Jun/Axl/Gas6/Trem2	7
C8	GO:0031344	regulation of cell projection organization	10/98	807/23328	0.00209272	0.0101775	0.0059646	Apoe/Dab2/Hspa5/Itgb1/Grn/Lrp1/Scarb2/Plxnb2/Tgfbr1/Trem2	10
C8	GO:0010811	positive regulation of cell-substrate adhesion	4/98	128/23328	0.00209837	0.0101775	0.0059646	Dab2/Itgb1/Cd36/Calr	4
C8	GO:0010810	regulation of cell-substrate adhesion	5/98	214/23328	0.00210997	0.0101837	0.00596823	Dab2/Itgb1/Cd36/Lrp1/Calr	5
C8	GO:0001933	negative regulation of protein phosphorylation	7/98	425/23328	0.00211537	0.0101837	0.00596823	Apoe/Dab2/Ppp1r15a/Jun/Spred1/Dusp6/Dok2	7
C8	GO:1903829	positive regulation of cellular protein localization	6/98	317/23328	0.00221973	0.0106088	0.00621739	Itgb1/Lrp1/Gas6/Myo5a/Sqstm1/Trem2	6
C8	GO:0008203	cholesterol metabolic process	4/98	130/23328	0.00222006	0.0106088	0.00621739	Apoe/Abca1/Lrp1/Cln8	4
C8	GO:0006665	sphingolipid metabolic process	4/98	131/23328	0.0022827	0.0108282	0.00634598	Cln8/Galc/Hexa/Hacd3	4
C8	GO:0031623	receptor internalization	4/98	131/23328	0.0022827	0.0108282	0.00634598	Dab2/Itgb1/Cd36/Cltc	4
C8	GO:0002573	myeloid leukocyte differentiation	5/98	220/23328	0.00237866	0.0112422	0.0065886	C1qc/Csf1r/Pf4/Jun/Trem2	5
C8	GO:0051493	regulation of cytoskeleton organization	8/98	557/23328	0.00241186	0.0113577	0.00665627	Csf1r/Rhob/Bin1/Lrp1/Cltc/Ctsl/Mtss1/Tgfbr1	8
C8	GO:0019058	viral life cycle	5/98	221/23328	0.00242575	0.0113817	0.00667035	Apoe/Ctsb/Axl/Gas6/Hacd3	5
C8	GO:0045732	positive regulation of protein catabolic process	5/98	222/23328	0.00247352	0.0115639	0.00677715	Apoe/Dab2/Lrp1/Wwp1/Trem2	5
C8	GO:0019935	cyclic-nucleotide-mediated signaling	5/98	223/23328	0.00252197	0.011748	0.00688503	Apoe/Pf4/Abca1/Cd36/Ednrb	5
C8	GO:0045860	positive regulation of protein kinase activity	7/98	440/23328	0.00256765	0.0118913	0.00696903	Csf1r/Dab2/Egr1/Gas6/Slc11a1/Fcgr1/Tgfbr1	7
C8	GO:0045637	regulation of myeloid cell differentiation	5/98	224/23328	0.0025711	0.0118913	0.00696903	C1qc/Csf1r/Pf4/Jun/Trem2	5
C8	GO:0007204	positive regulation of cytosolic calcium ion concentration	6/98	330/23328	0.00271009	0.0124896	0.00731962	Cx3cr1/C3ar1/Cd36/Ednrb/Lrp1/Myo5a	6
C8	GO:0006639	acylglycerol metabolic process	4/98	138/23328	0.00275567	0.0126099	0.00739013	Apoe/Lpl/Cd36/Nr1h3	4
C8	GO:0035023	regulation of Rho protein signal transduction	4/98	138/23328	0.00275567	0.0126099	0.00739013	Apoe/Abca1/Itgb1/Tnfaip1	4
C8	GO:0016197	endosomal transport	5/98	228/23328	0.00277461	0.0126518	0.00741473	Ehd4/Abca1/Vps50/Cltc/Snx5	5
C8	GO:0062197	cellular response to chemical stress	6/98	332/23328	0.00279221	0.0126874	0.00743558	Cd36/Jun/Rhob/Axl/Serpinb6a/Aif1	6
C8	GO:0016125	sterol metabolic process	4/98	139/23328	0.0028283	0.0127874	0.00749417	Apoe/Abca1/Lrp1/Cln8	4
C8	GO:0046942	carboxylic acid transport	6/98	333/23328	0.00283396	0.0127874	0.00749417	Apoe/Itgb1/Cd36/Slc43a2/Cln8/Slc11a1	6
C8	GO:0043086	negative regulation of catalytic activity	9/98	704/23328	0.0028485	0.0128084	0.00750646	Apoe/Ppp1r15a/Bin1/Spred1/Gas6/Cln8/Serpinb6a/Dusp6/Cst3	9
C8	GO:0043270	positive regulation of ion transport	6/98	334/23328	0.00287618	0.0128881	0.00755319	Apoe/Ctss/Atp2b1/Itgb1/Ifngr2/Trem2	6
C8	GO:0006638	neutral lipid metabolic process	4/98	140/23328	0.00290223	0.0129154	0.00756922	Apoe/Lpl/Cd36/Nr1h3	4
C8	GO:0050905	neuromuscular process	4/98	140/23328	0.00290223	0.0129154	0.00756922	Cln8/Uba5/Myo5a/Hexa	4
C8	GO:0043434	response to peptide hormone	6/98	336/23328	0.00296204	0.0130706	0.00766017	Lpl/Egr1/Atp2b1/Ednrb/Snx5/Myo5a	6
C8	GO:0050890	cognition	6/98	336/23328	0.00296204	0.0130706	0.00766017	Apoe/Cx3cr1/Egr1/Itgb1/Jun/Cln8	6
C8	GO:0035966	response to topologically incorrect protein	4/98	141/23328	0.00297748	0.0130706	0.00766017	Hspa5/Ppp1r15a/Pdia6/Calr	4
C8	GO:1902652	secondary alcohol metabolic process	4/98	141/23328	0.00297748	0.0130706	0.00766017	Apoe/Abca1/Lrp1/Cln8	4
C8	GO:0015849	organic acid transport	6/98	337/23328	0.00300568	0.0131056	0.00768065	Apoe/Itgb1/Cd36/Slc43a2/Cln8/Slc11a1	6
C8	GO:0050768	negative regulation of neurogenesis	6/98	337/23328	0.00300568	0.0131056	0.00768065	Apoe/Dab2/Itgb1/Ednrb/Lrp1/Calr	6
C8	GO:0008610	lipid biosynthetic process	8/98	581/23328	0.00312102	0.0135628	0.00794862	Apoe/Dab2/Lpl/Egr1/Hpgds/Nr1h3/Myo5a/Hacd3	8
C8	GO:0034762	regulation of transmembrane transport	8/98	582/23328	0.00315375	0.0136341	0.00799041	Ctss/Itgb1/Slc43a2/Bin1/Ifngr2/Cttnbp2nl/Myo5a/Trem2	8
C8	GO:0032868	response to insulin	5/98	235/23328	0.00315848	0.0136341	0.00799041	Lpl/Egr1/Atp2b1/Snx5/Myo5a	5
C8	GO:0033002	muscle cell proliferation	5/98	236/23328	0.0032163	0.0138376	0.00810963	C3ar1/Egr1/Jun/Aif1/Tgfbr1	5
C8	GO:1903364	positive regulation of cellular protein catabolic process	4/98	145/23328	0.00329182	0.0141156	0.00827258	Apoe/Dab2/Lrp1/Trem2	4
C8	GO:0031667	response to nutrient levels	6/98	346/23328	0.00342044	0.0146187	0.00856744	Apoe/Lpl/Hspa5/Jun/Gas6/Rnase4	6
C8	GO:0046578	regulation of Ras protein signal transduction	5/98	240/23328	0.0034552	0.0146932	0.00861108	Apoe/Abca1/Itgb1/Cyth4/Tnfaip1	5
C8	GO:0051347	positive regulation of transferase activity	8/98	591/23328	0.00346055	0.0146932	0.00861108	Csf1r/Dab2/Egr1/Axl/Gas6/Slc11a1/Fcgr1/Tgfbr1	8
C8	GO:0031400	negative regulation of protein modification process	8/98	592/23328	0.00349603	0.0147953	0.00867092	Apoe/Dab2/Ppp1r15a/Jun/Spred1/Dusp6/Sqstm1/Dok2	8
C8	GO:0006820	anion transport	8/98	597/23328	0.00367766	0.0155133	0.0090917	Apoe/Abca1/Itgb1/Cd36/Slc43a2/Scarb2/Cln8/Slc11a1	8
C8	GO:0010498	proteasomal protein catabolic process	7/98	470/23328	0.00369281	0.0155218	0.00909669	Apoe/Dab2/Hspa5/Hsp90b1/Wwp1/Tnfaip1/Trem2	7
C8	GO:0010634	positive regulation of epithelial cell migration	4/98	150/23328	0.00371564	0.0155218	0.00909669	Jun/Rhob/Grn/Calr	4
C8	GO:0034614	cellular response to reactive oxygen species	4/98	150/23328	0.00371564	0.0155218	0.00909669	Cd36/Jun/Rhob/Axl	4
C8	GO:0042326	negative regulation of phosphorylation	7/98	471/23328	0.00373588	0.0155561	0.00911683	Apoe/Dab2/Ppp1r15a/Jun/Spred1/Dusp6/Dok2	7
C8	GO:0045666	positive regulation of neuron differentiation	7/98	472/23328	0.00377933	0.0156866	0.00919331	Apoe/Hspa5/Itgb1/Grn/Lrp1/Scarb2/Plxnb2	7
C8	GO:0055088	lipid homeostasis	4/98	153/23328	0.00398694	0.0164955	0.00966733	Apoe/Lpl/Abca1/Nr1h3	4
C8	GO:0009894	regulation of catabolic process	10/98	884/23328	0.00401367	0.0165524	0.00970071	Apoe/Dab2/Itgb1/Lrp1/Ctsa/Scarb2/Wwp1/Slc11a1/Cst3/Trem2	10
C8	GO:0062012	regulation of small molecule metabolic process	6/98	358/23328	0.0040381	0.0165524	0.00970071	Apoe/Dab2/Egr1/Cltc/Nr1h3/Trem2	6
C8	GO:0010001	glial cell differentiation	5/98	249/23328	0.00403905	0.0165524	0.00970071	C1qa/Grn/Bin1/Lrp1/Trem2	5
C8	GO:0043269	regulation of ion transport	9/98	743/23328	0.00405966	0.0165844	0.00971945	Apoe/Ctss/Atp2b1/Itgb1/Slc43a2/Bin1/Ifngr2/Myo5a/Trem2	9
C8	GO:0014013	regulation of gliogenesis	4/98	154/23328	0.00408027	0.0166162	0.00973808	Cx3cr1/Bin1/Lrp1/Trem2	4
C8	GO:0006457	protein folding	4/98	155/23328	0.00417507	0.0168021	0.00984703	Hspa5/Grn/Hsp90b1/Calr	4
C8	GO:0016482	cytosolic transport	4/98	155/23328	0.00417507	0.0168021	0.00984703	Dab2/Vps50/Cltc/Snx5	4
C8	GO:0097530	granulocyte migration	4/98	155/23328	0.00417507	0.0168021	0.00984703	Csf1r/Pf4/C3ar1/Itga9	4
C8	GO:0098657	import into cell	5/98	251/23328	0.00417782	0.0168021	0.00984703	Itgb1/Cd36/Slc43a2/Cln8/Trem2	5
C8	GO:0009267	cellular response to starvation	4/98	156/23328	0.00427135	0.0170722	0.0100053	Hspa5/Jun/Gas6/Rnase4	4
C8	GO:0050728	negative regulation of inflammatory response	4/98	156/23328	0.00427135	0.0170722	0.0100053	Apoe/Cx3cr1/Grn/Nr1h3	4
C8	GO:0051961	negative regulation of nervous system development	6/98	365/23328	0.00443459	0.0176701	0.0103558	Apoe/Dab2/Itgb1/Ednrb/Lrp1/Calr	6
C8	GO:0034765	regulation of ion transmembrane transport	7/98	489/23328	0.00457862	0.0181881	0.0106593	Ctss/Itgb1/Slc43a2/Bin1/Ifngr2/Myo5a/Trem2	7
C8	GO:0010975	regulation of neuron projection development	8/98	623/23328	0.00474337	0.0187849	0.0110091	Apoe/Dab2/Hspa5/Itgb1/Grn/Lrp1/Scarb2/Plxnb2	8
C8	GO:0032412	regulation of ion transmembrane transporter activity	5/98	259/23328	0.00476711	0.0187964	0.0110158	Ctss/Itgb1/Ifngr2/Myo5a/Trem2	5
C8	GO:0030178	negative regulation of Wnt signaling pathway	4/98	161/23328	0.00477531	0.0187964	0.0110158	Apoe/Dab2/Egr1/Lrp1	4
C8	GO:0006865	amino acid transport	4/98	162/23328	0.00488069	0.019153	0.0112248	Itgb1/Slc43a2/Cln8/Slc11a1	4
C8	GO:0034249	negative regulation of cellular amide metabolic process	4/98	164/23328	0.00509611	0.0199379	0.0116848	Apoe/Bin1/Calr/Bank1	4
C8	GO:0006575	cellular modified amino acid metabolic process	4/98	165/23328	0.00520617	0.0201856	0.01183	Ctsb/Hpgds/Ckb/Ctsl	4
C8	GO:0048660	regulation of smooth muscle cell proliferation	4/98	165/23328	0.00520617	0.0201856	0.01183	C3ar1/Egr1/Jun/Aif1	4
C8	GO:2001236	regulation of extrinsic apoptotic signaling pathway	4/98	165/23328	0.00520617	0.0201856	0.01183	Cx3cr1/Pf4/Dab2/Tgfbr1	4
C8	GO:0007565	female pregnancy	4/98	166/23328	0.00531782	0.0205569	0.0120476	Ctsb/Grn/Ctsl/Calr	4
C8	GO:0045834	positive regulation of lipid metabolic process	4/98	167/23328	0.00543106	0.0209322	0.0122675	Apoe/Dab2/Cd36/Nr1h3	4
C8	GO:0032870	cellular response to hormone stimulus	7/98	507/23328	0.00555804	0.021358	0.0125171	Dab2/Lpl/Atp2b1/Snx5/Uba5/Myo5a/Calr	7
C8	GO:0022898	regulation of transmembrane transporter activity	5/98	270/23328	0.0056709	0.0216822	0.012707	Ctss/Itgb1/Ifngr2/Myo5a/Trem2	5
C8	GO:0008015	blood circulation	7/98	509/23328	0.00567587	0.0216822	0.012707	Apoe/C3ar1/Atp2b1/Cd36/Ednrb/Bin1/Gas6	7
C8	GO:0051056	regulation of small GTPase mediated signal transduction	5/98	271/23328	0.00575865	0.0219337	0.0128545	Apoe/Abca1/Itgb1/Cyth4/Tnfaip1	5
C8	GO:0048659	smooth muscle cell proliferation	4/98	170/23328	0.00578045	0.0219521	0.0128653	C3ar1/Egr1/Jun/Aif1	4
C8	GO:0051051	negative regulation of transport	7/98	512/23328	0.00585612	0.0221163	0.0129615	Apoe/Cd36/Slc43a2/Bin1/Nr1h3/Cttnbp2nl/Rap1b	7
C8	GO:0010721	negative regulation of cell development	6/98	387/23328	0.00586893	0.0221163	0.0129615	Apoe/Dab2/Itgb1/Ednrb/Lrp1/Calr	6
C8	GO:0071345	cellular response to cytokine stimulus	10/98	934/23328	0.0058749	0.0221163	0.0129615	Mrc1/Cx3cr1/Csf1r/Pf4/Egr1/Hspa5/Ifngr2/Axl/Gas6/Trem2	10
C8	GO:0071695	anatomical structure maturation	5/98	273/23328	0.00593703	0.0222854	0.0130606	Cx3cr1/C1qa/Ednrb/Ctsl/Myo5a	5
C8	GO:0034599	cellular response to oxidative stress	5/98	276/23328	0.00621185	0.0232496	0.0136256	Cd36/Jun/Rhob/Axl/Aif1	5
C8	GO:0006643	membrane lipid metabolic process	4/98	174/23328	0.00626921	0.0233966	0.0137118	Cln8/Galc/Hexa/Hacd3	4
C8	GO:0031349	positive regulation of defense response	5/98	278/23328	0.00639997	0.023816	0.0139576	Ctss/Lpl/Grn/Fcgr1/Trem2	5
C8	GO:0098662	inorganic cation transmembrane transport	8/98	657/23328	0.00647863	0.0239376	0.0140288	Atp2b1/Slc40a1/Itgb1/Bin1/Gas6/Slc11a1/Myo5a/Trem2	8
C8	GO:0002790	peptide secretion	7/98	522/23328	0.0064881	0.0239376	0.0140288	Apoe/Abca1/Cd36/Lrp1/Nr1h3/Myo5a/Trem2	7
C8	GO:0061564	axon development	7/98	522/23328	0.0064881	0.0239376	0.0140288	Apoe/Csf1r/Itgb1/Jun/Grn/Lrp1/Plxnb2	7
C8	GO:0051046	regulation of secretion	9/98	803/23328	0.0066741	0.0245539	0.01439	Apoe/Dab2/Cd36/Ednrb/Lrp1/Nr1h3/Rap1b/Myo5a/Trem2	9
C8	GO:0042594	response to starvation	4/98	178/23328	0.00678472	0.0248901	0.0145871	Hspa5/Jun/Gas6/Rnase4	4
C8	GO:0003013	circulatory system process	7/98	530/23328	0.00702931	0.0257146	0.0150703	Apoe/C3ar1/Atp2b1/Cd36/Ednrb/Bin1/Gas6	7
C8	GO:0001659	temperature homeostasis	4/98	181/23328	0.00718928	0.0262257	0.0153698	Egr1/Cd36/Ednrb/Nr1h3	4
C8	GO:0050778	positive regulation of immune response	8/98	670/23328	0.00725645	0.0263121	0.0154205	C1qc/C1qb/C3ar1/Cd36/C1qa/Slc11a1/Fcgr1/Fyb	8
C8	GO:0000904	cell morphogenesis involved in differentiation	9/98	814/23328	0.00726929	0.0263121	0.0154205	Apoe/Csf1r/Dab2/Itgb1/Axl/Lrp1/Plxnb2/Calr/Hexa	9
C8	GO:0051346	negative regulation of hydrolase activity	6/98	405/23328	0.00727392	0.0263121	0.0154205	Ppp1r15a/Bin1/Spred1/Gas6/Serpinb6a/Cst3	6
C8	GO:0002263	cell activation involved in immune response	5/98	289/23328	0.0075068	0.0270788	0.0158698	Cx3cr1/Grn/Lrp1/Slc11a1/Trem2	5
C8	GO:0006631	fatty acid metabolic process	6/98	408/23328	0.00752986	0.0270866	0.0158743	Lpl/Hpgds/Cd36/Nr1h3/Myo5a/Hacd3	6
C8	GO:0022604	regulation of cell morphogenesis	7/98	538/23328	0.00760347	0.0271722	0.0159245	Apoe/Csf1r/Dab2/Rhob/Lrp1/Plxnb2/Calr	7
C8	GO:0046890	regulation of lipid biosynthetic process	4/98	184/23328	0.00760948	0.0271722	0.0159245	Apoe/Dab2/Egr1/Nr1h3	4
C8	GO:0030098	lymphocyte differentiation	6/98	409/23328	0.0076166	0.0271722	0.0159245	Egr1/Axl/Gas6/Wwp1/Ctsl/Dclre1c	6
C8	GO:0034767	positive regulation of ion transmembrane transport	4/98	187/23328	0.00804556	0.0286236	0.0167752	Ctss/Itgb1/Ifngr2/Trem2	4
C8	GO:0002695	negative regulation of leukocyte activation	4/98	189/23328	0.00834523	0.0296084	0.0173523	Grn/Axl/Nr1h3/Bank1	4
C8	GO:0044089	positive regulation of cellular component biogenesis	7/98	550/23328	0.00852901	0.0301778	0.017686	Apoe/Abca1/Cd36/Bin1/Mtss1/Tgfbr1/Rap1b	7
C8	GO:0046889	positive regulation of lipid biosynthetic process	3/98	100/23328	0.00866184	0.0305643	0.0179125	Apoe/Dab2/Nr1h3	3
C8	GO:0052547	regulation of peptidase activity	6/98	421/23328	0.00871468	0.0306672	0.0179728	Grn/Bin1/Gas6/Serpinb6a/Cst3/Ctsd	6
C8	GO:0150063	visual system development	6/98	422/23328	0.00881105	0.0309223	0.0181223	Maf/C1qa/Jun/Spred1/Cln8/Tgfbr1	6
C8	GO:0043405	regulation of MAP kinase activity	5/98	301/23328	0.00885958	0.0310085	0.0181729	Apoe/Dab2/Spred1/Dusp6/Tgfbr1	5
C8	GO:0032755	positive regulation of interleukin-6 production	3/98	101/23328	0.0089002	0.0310667	0.018207	Lpl/Cd36/Aif1	3
C8	GO:0006914	autophagy	6/98	425/23328	0.00910477	0.0316104	0.0185256	Ctsa/Cltc/Uba5/Sqstm1/Trem2/Ctsd	6
C8	GO:0061919	process utilizing autophagic mechanism	6/98	425/23328	0.00910477	0.0316104	0.0185256	Ctsa/Cltc/Uba5/Sqstm1/Trem2/Ctsd	6
C8	GO:0048880	sensory system development	6/98	426/23328	0.00920422	0.0318702	0.0186778	Maf/C1qa/Jun/Spred1/Cln8/Tgfbr1	6
C8	GO:0080135	regulation of cellular response to stress	8/98	699/23328	0.00924502	0.0319261	0.0187106	Dab2/Ppp1r15a/Cd36/Grn/Lrp1/Spred1/Nr1h3/Pdia6	8
C8	GO:0010595	positive regulation of endothelial cell migration	3/98	103/23328	0.0093884	0.032164	0.01885	Rhob/Grn/Calr	3
C8	GO:0015748	organophosphate ester transport	3/98	103/23328	0.0093884	0.032164	0.01885	Apoe/Abca1/Scarb2	3
C8	GO:0050772	positive regulation of axonogenesis	3/98	103/23328	0.0093884	0.032164	0.01885	Apoe/Lrp1/Plxnb2	3
C8	GO:0042445	hormone metabolic process	4/98	196/23328	0.00945149	0.0322947	0.0189266	Ctsb/Dab2/Egr1/Ctsl	4
C8	GO:0044706	multi-multicellular organism process	4/98	197/23328	0.00961693	0.0326742	0.019149	Ctsb/Grn/Ctsl/Calr	4
C8	GO:0046916	cellular transition metal ion homeostasis	3/98	104/23328	0.00963826	0.0326742	0.019149	Ftl1/Slc40a1/Slc11a1	3
C8	GO:0052126	movement in host environment	3/98	104/23328	0.00963826	0.0326742	0.019149	Ctsb/Axl/Gas6	3
C8	GO:0010563	negative regulation of phosphorus metabolic process	7/98	566/23328	0.00988927	0.0333505	0.0195454	Apoe/Dab2/Ppp1r15a/Jun/Spred1/Dusp6/Dok2	7
C8	GO:0045936	negative regulation of phosphate metabolic process	7/98	566/23328	0.00988927	0.0333505	0.0195454	Apoe/Dab2/Ppp1r15a/Jun/Spred1/Dusp6/Dok2	7
C8	GO:0000041	transition metal ion transport	3/98	106/23328	0.0101496	0.033963	0.0199043	Slc40a1/Cltc/Slc11a1	3
C8	GO:0006022	aminoglycan metabolic process	3/98	106/23328	0.0101496	0.033963	0.0199043	Lyve1/Cltc/Hexa	3
C8	GO:0034446	substrate adhesion-dependent cell spreading	3/98	106/23328	0.0101496	0.033963	0.0199043	Dab2/Axl/Calr	3
C8	GO:0032869	cellular response to insulin stimulus	4/98	201/23328	0.0102975	0.034281	0.0200907	Lpl/Atp2b1/Snx5/Myo5a	4
C8	GO:0050792	regulation of viral process	4/98	201/23328	0.0102975	0.034281	0.0200907	Apoe/Csf1r/Jun/Hacd3	4
C8	GO:0002367	cytokine production involved in immune response	3/98	107/23328	0.010411	0.0343402	0.0201254	Cd36/Gas6/Slc11a1	3
C8	GO:0030518	intracellular steroid hormone receptor signaling pathway	3/98	107/23328	0.010411	0.0343402	0.0201254	Dab2/Uba5/Calr	3
C8	GO:1903426	regulation of reactive oxygen species biosynthetic process	3/98	107/23328	0.010411	0.0343402	0.0201254	Cx3cr1/Cd36/Aif1	3
C8	GO:0098660	inorganic ion transmembrane transport	8/98	714/23328	0.0104214	0.0343402	0.0201254	Atp2b1/Slc40a1/Itgb1/Bin1/Gas6/Slc11a1/Myo5a/Trem2	8
C8	GO:0000302	response to reactive oxygen species	4/98	202/23328	0.0104724	0.0344208	0.0201726	Cd36/Jun/Rhob/Axl	4
C8	GO:0043266	regulation of potassium ion transport	3/98	108/23328	0.0106764	0.0349139	0.0204616	Itgb1/Bin1/Trem2	3
C8	GO:0060840	artery development	3/98	108/23328	0.0106764	0.0349139	0.0204616	Apoe/Lrp1/Tgfbr1	3
C8	GO:0071900	regulation of protein serine/threonine kinase activity	6/98	442/23328	0.0109032	0.0355659	0.0208438	Apoe/Csf1r/Dab2/Spred1/Dusp6/Tgfbr1	6
C8	GO:0001959	regulation of cytokine-mediated signaling pathway	3/98	109/23328	0.0109456	0.0356146	0.0208723	Axl/Gas6/Trem2	3
C8	GO:0045216	cell-cell junction organization	4/98	205/23328	0.0110086	0.035717	0.0209323	Csf1r/Itgb1/Mtss1/Tgfbr1	4
C8	GO:0046649	lymphocyte activation	9/98	871/23328	0.0110323	0.035717	0.0209323	Egr1/Axl/Gas6/Wwp1/Slc11a1/Ctsl/Aif1/Dclre1c/Bank1	9
C8	GO:0006275	regulation of DNA replication	3/98	110/23328	0.0112188	0.036107	0.0211609	Jun/Cst3/Tnfaip1	3
C8	GO:0017015	regulation of transforming growth factor beta receptor signaling pathway	3/98	110/23328	0.0112188	0.036107	0.0211609	Dab2/Hspa5/Spred1	3
C8	GO:0002460	adaptive immune response based on somatic recombination of immune receptors built from immunoglobulin superfamily domains	6/98	445/23328	0.011245	0.036107	0.0211609	C1qc/C1qb/C3ar1/C1qa/Slc11a1/Fcgr1	6
C8	GO:0090066	regulation of anatomical structure size	7/98	581/23328	0.011303	0.036107	0.0211609	Apoe/Atp2b1/Ppp1r15a/Ednrb/Bin1/Lrp1/Cln8	7
C8	GO:0030001	metal ion transport	9/98	875/23328	0.0113428	0.036107	0.0211609	Atp2b1/Slc40a1/Itgb1/Bin1/Gas6/Cltc/Slc11a1/Myo5a/Trem2	9
C8	GO:1903530	regulation of secretion by cell	8/98	725/23328	0.0113525	0.036107	0.0211609	Apoe/Dab2/Cd36/Lrp1/Nr1h3/Rap1b/Myo5a/Trem2	8
C8	GO:0031032	actomyosin structure organization	4/98	207/23328	0.0113758	0.036107	0.0211609	Itgb5/Itgb1/Tgfbr1/Tnfaip1	4
C8	GO:0031345	negative regulation of cell projection organization	4/98	207/23328	0.0113758	0.036107	0.0211609	Apoe/Dab2/Itgb1/Lrp1	4
C8	GO:0040008	regulation of growth	8/98	726/23328	0.0114401	0.0362222	0.0212284	Apoe/Selenop/Dab2/Lrp1/Gas6/Dusp6/Tgfbr1/H19	8
C8	GO:0019218	regulation of steroid metabolic process	3/98	111/23328	0.0114959	0.0363102	0.0212799	Apoe/Dab2/Egr1	3
C8	GO:0006066	alcohol metabolic process	5/98	323/23328	0.011762	0.0368384	0.0215895	Apoe/Dab2/Abca1/Lrp1/Cln8	5
C8	GO:0030038	contractile actin filament bundle assembly	3/98	112/23328	0.0117769	0.0368384	0.0215895	Itgb5/Tgfbr1/Tnfaip1	3
C8	GO:0043149	stress fiber assembly	3/98	112/23328	0.0117769	0.0368384	0.0215895	Itgb5/Tgfbr1/Tnfaip1	3
C8	GO:1903844	regulation of cellular response to transforming growth factor beta stimulus	3/98	112/23328	0.0117769	0.0368384	0.0215895	Dab2/Hspa5/Spred1	3
C8	GO:0016042	lipid catabolic process	5/98	324/23328	0.0119076	0.0370688	0.0217245	Apoe/Lpl/Lrp1/Galc/Hexa	5
C8	GO:0002250	adaptive immune response	7/98	587/23328	0.0119078	0.0370688	0.0217245	C1qc/C1qb/C3ar1/C1qa/Slc11a1/Fcgr1/Dclre1c	7
C8	GO:0048609	multicellular organismal reproductive process	9/98	886/23328	0.0122308	0.0379831	0.0222604	Ctsb/Egr1/Hpgds/Itgb1/Ednrb/Grn/Axl/Ctsl/Tgfbr1	9
C8	GO:0032649	regulation of interferon-gamma production	3/98	114/23328	0.0123508	0.0380844	0.0223197	Axl/Gas6/Slc11a1	3
C8	GO:0043401	steroid hormone mediated signaling pathway	3/98	114/23328	0.0123508	0.0380844	0.0223197	Dab2/Uba5/Calr	3
C8	GO:0021700	developmental maturation	5/98	327/23328	0.0123517	0.0380844	0.0223197	Cx3cr1/C1qa/Ednrb/Ctsl/Myo5a	5
C8	GO:0050865	regulation of cell activation	8/98	737/23328	0.0124371	0.0382567	0.0224207	Apoe/Grn/Axl/Gas6/Nr1h3/Aif1/Trem2/Bank1	8
C8	GO:0051651	maintenance of location in cell	4/98	213/23328	0.0125244	0.0384338	0.0225245	Apoe/Ftl1/Hspa5/Myo5a	4
C8	GO:0018958	phenol-containing compound metabolic process	3/98	115/23328	0.0126436	0.0386759	0.0226664	Ctsb/Ctsl/Myo5a	3
C8	GO:0031329	regulation of cellular catabolic process	8/98	740/23328	0.0127198	0.0386759	0.0226664	Apoe/Dab2/Lrp1/Ctsa/Scarb2/Slc11a1/Cst3/Trem2	8
C8	GO:0007160	cell-matrix adhesion	4/98	214/23328	0.0127227	0.0386759	0.0226664	Itgb5/Itgb1/Cd36/Lrp1	4
C8	GO:0019722	calcium-mediated signaling	4/98	214/23328	0.0127227	0.0386759	0.0226664	Cx3cr1/Ednrb/Myo5a/Trem2	4
C8	GO:0007249	I-kappaB kinase/NF-kappaB signaling	4/98	215/23328	0.0129231	0.039193	0.0229694	Cx3cr1/Cd36/Sqstm1/Hacd3	4
C8	GO:0032414	positive regulation of ion transmembrane transporter activity	3/98	117/23328	0.0132412	0.0399706	0.0234252	Ctss/Ifngr2/Trem2	3
C8	GO:0071901	negative regulation of protein serine/threonine kinase activity	3/98	117/23328	0.0132412	0.0399706	0.0234252	Apoe/Spred1/Dusp6	3
C8	GO:0002683	negative regulation of immune system process	6/98	462/23328	0.0133265	0.0401345	0.0235212	C1qc/Pf4/Grn/Axl/Nr1h3/Bank1	6
C8	GO:0043903	regulation of interspecies interactions between organisms	4/98	218/23328	0.0135363	0.0405776	0.0237809	Apoe/Csf1r/Jun/Hacd3	4
C8	GO:0048545	response to steroid hormone	4/98	218/23328	0.0135363	0.0405776	0.0237809	Dab2/Nr1h3/Uba5/Calr	4
C8	GO:0042742	defense response to bacterium	6/98	464/23328	0.013588	0.0406385	0.0238166	Stab1/Cd36/Grn/Slc11a1/Fcgr1/Trem2	6
C8	GO:0032504	multicellular organism reproduction	9/98	903/23328	0.0137046	0.0408927	0.0239655	Ctsb/Egr1/Hpgds/Itgb1/Ednrb/Grn/Axl/Ctsl/Tgfbr1	9
C8	GO:0044242	cellular lipid catabolic process	4/98	219/23328	0.0137447	0.0409183	0.0239805	Lpl/Lrp1/Galc/Hexa	4
C8	GO:0043534	blood vessel endothelial cell migration	3/98	119/23328	0.0138548	0.041057	0.0240619	Apoe/Itgb1/Spred1	3
C8	GO:0060759	regulation of response to cytokine stimulus	3/98	119/23328	0.0138548	0.041057	0.0240619	Axl/Gas6/Trem2	3
C8	GO:0009306	protein secretion	6/98	470/23328	0.0143941	0.0425578	0.0249414	Apoe/Cd36/Lrp1/Nr1h3/Myo5a/Trem2	6
C8	GO:0035592	establishment of protein localization to extracellular region	6/98	471/23328	0.0145316	0.0428666	0.0251224	Apoe/Cd36/Lrp1/Nr1h3/Myo5a/Trem2	6
C8	GO:1903828	negative regulation of cellular protein localization	3/98	122/23328	0.014805	0.0435121	0.0255007	Dab2/Cd36/Cltc	3
C8	GO:0003018	vascular process in circulatory system	4/98	224/23328	0.0148176	0.0435121	0.0255007	Apoe/Atp2b1/Cd36/Ednrb	4
C8	GO:0048762	mesenchymal cell differentiation	4/98	225/23328	0.0150384	0.0440605	0.0258221	Dab2/Ednrb/Spred1/Tgfbr1	4
C8	GO:0045862	positive regulation of proteolysis	5/98	344/23328	0.015082	0.0440884	0.0258384	Apoe/Dab2/Grn/Trem2/Ctsd	5
C8	GO:0010921	regulation of phosphatase activity	3/98	123/23328	0.0151298	0.0441285	0.025862	Ppp1r15a/Spred1/Hsp90b1	3
C8	GO:0032411	positive regulation of transporter activity	3/98	124/23328	0.0154586	0.0447849	0.0262466	Ctss/Ifngr2/Trem2	3
C8	GO:1905039	carboxylic acid transmembrane transport	3/98	124/23328	0.0154586	0.0447849	0.0262466	Itgb1/Slc43a2/Cln8	3
C8	GO:1990266	neutrophil migration	3/98	124/23328	0.0154586	0.0447849	0.0262466	Pf4/C3ar1/Itga9	3
C8	GO:0071692	protein localization to extracellular region	6/98	478/23328	0.0155201	0.0448087	0.0262606	Apoe/Cd36/Lrp1/Nr1h3/Myo5a/Trem2	6
C8	GO:0030855	epithelial cell differentiation	7/98	619/23328	0.015536	0.0448087	0.0262606	Maf/Dab2/Jun/Spred1/Mtss1/Tgfbr1/Rap1b	7
C8	GO:0031348	negative regulation of defense response	4/98	228/23328	0.0157131	0.0451431	0.0264566	Apoe/Cx3cr1/Grn/Nr1h3	4
C8	GO:0010212	response to ionizing radiation	3/98	125/23328	0.0157914	0.0451431	0.0264566	Egr1/Rhob/Dclre1c	3
C8	GO:1903409	reactive oxygen species biosynthetic process	3/98	125/23328	0.0157914	0.0451431	0.0264566	Cx3cr1/Cd36/Aif1	3
C8	GO:1903825	organic acid transmembrane transport	3/98	125/23328	0.0157914	0.0451431	0.0264566	Itgb1/Slc43a2/Cln8	3
C8	GO:0045861	negative regulation of proteolysis	5/98	350/23328	0.016135	0.0460238	0.0269727	Bin1/Gas6/Nr1h3/Serpinb6a/Cst3	5
C8	GO:0010769	regulation of cell morphogenesis involved in differentiation	5/98	351/23328	0.0163151	0.046364	0.0271721	Apoe/Dab2/Lrp1/Plxnb2/Calr	5
C8	GO:0043393	regulation of protein binding	4/98	231/23328	0.0164067	0.046364	0.0271721	Apoe/Dab2/Lrp1/Tgfbr1	4
C8	GO:0099504	synaptic vesicle cycle	4/98	231/23328	0.0164067	0.046364	0.0271721	Grn/Bin1/Cltc/Rap1b	4
C8	GO:2001234	negative regulation of apoptotic signaling pathway	4/98	231/23328	0.0164067	0.046364	0.0271721	Cx3cr1/Pf4/Dab2/Tgfbr1	4
C8	GO:0042157	lipoprotein metabolic process	3/98	127/23328	0.0164691	0.046364	0.0271721	Apoe/Abca1/Ctsd	3
C8	GO:0090090	negative regulation of canonical Wnt signaling pathway	3/98	127/23328	0.0164691	0.046364	0.0271721	Apoe/Dab2/Egr1	3
C8	GO:0032609	interferon-gamma production	3/98	128/23328	0.016814	0.0472323	0.0276809	Axl/Gas6/Slc11a1	3
C8	GO:0097191	extrinsic apoptotic signaling pathway	4/98	233/23328	0.0168796	0.0473139	0.0277288	Cx3cr1/Pf4/Dab2/Tgfbr1	4
C8	GO:0006470	protein dephosphorylation	4/98	235/23328	0.0173609	0.0484534	0.0283966	Ppp1r15a/Hsp90b1/Cttnbp2nl/Dusp6	4
C8	GO:0031334	positive regulation of protein-containing complex assembly	4/98	235/23328	0.0173609	0.0484534	0.0283966	Abca1/Cd36/Bin1/Rap1b	4
C9	GO:0034101	erythrocyte homeostasis	14/98	149/23328	1.32e-15	1.55e-12	1.28e-12	Hba-a1/Hba-a2/Slc4a1/Alas2/Cd24a/Fech/Trim10/Ank1/Bpgm/Tal1/Rhd/Epb42/Fam210b/Sox6	14
C9	GO:0030218	erythrocyte differentiation	13/98	138/23328	1.41e-14	8.24e-12	6.83e-12	Hba-a1/Hba-a2/Slc4a1/Alas2/Fech/Trim10/Ank1/Bpgm/Tal1/Rhd/Epb42/Fam210b/Sox6	13
C9	GO:0002262	myeloid cell homeostasis	14/98	187/23328	3.21e-14	1.25e-11	1.04e-11	Hba-a1/Hba-a2/Slc4a1/Alas2/Cd24a/Fech/Trim10/Ank1/Bpgm/Tal1/Rhd/Epb42/Fam210b/Sox6	14
C9	GO:0048872	homeostasis of number of cells	16/98	330/23328	3.6e-13	1.05e-10	8.71e-11	Hba-a1/Hba-a2/Slc4a1/Alas2/Cd24a/Prdx2/Fech/Spta1/Trim10/Ank1/Bpgm/Tal1/Rhd/Epb42/Fam210b/Sox6	16
C9	GO:0030099	myeloid cell differentiation	16/98	414/23328	1.11e-11	2.61e-09	2.16e-09	Hba-a1/Hba-a2/Car2/Slc4a1/Alas2/Fech/Prtn3/Trim10/Ank1/Bpgm/Tal1/Rhd/Epb42/Fam210b/Sox6/Tfrc	16
C9	GO:0030097	hemopoiesis	21/98	953/23328	1.91e-10	3.72e-08	3.08e-08	Hba-a1/Hba-a2/Car2/Slc4a1/Alas2/Cd24a/Prdx2/Fech/Spta1/Prtn3/Sptb/Trim10/Ank1/Bpgm/Tal1/Add2/Rhd/Epb42/Fam210b/Sox6/Tfrc	21
C9	GO:0055076	transition metal ion homeostasis	8/98	134/23328	7.67e-08	1.28e-05	1.06e-05	Alas2/Fech/Ank1/Rhd/Lcn2/Ltf/Epb42/Tfrc	8
C9	GO:0007159	leukocyte cell-cell adhesion	10/98	345/23328	1.46e-06	0.000213119	0.000176551	Slc4a1/Cd24a/Prdx2/Spta1/S100a9/S100a8/Add2/Elane/Tfrc/Sell	10
C9	GO:0055080	cation homeostasis	13/98	755/23328	1.17e-05	0.0015177	0.00125729	Car2/Slc4a1/Alas2/Cd24a/Fech/Ank1/Atp2b4/Snca/Rhd/Lcn2/Ltf/Epb42/Tfrc	13
C9	GO:0098771	inorganic ion homeostasis	13/98	767/23328	1.38e-05	0.00161386	0.00133695	Car2/Slc4a1/Alas2/Cd24a/Fech/Ank1/Atp2b4/Snca/Rhd/Lcn2/Ltf/Epb42/Tfrc	13
C9	GO:0050801	ion homeostasis	13/98	835/23328	3.35e-05	0.00356108	0.00295007	Car2/Slc4a1/Alas2/Cd24a/Fech/Ank1/Atp2b4/Snca/Rhd/Lcn2/Ltf/Epb42/Tfrc	13
C9	GO:0043254	regulation of protein-containing complex assembly	9/98	438/23328	7.54e-05	0.00734628	0.00608579	Cd24a/Spta1/Sptb/Snca/Tal1/Add2/Tmod1/Tfrc/Dut	9
C9	GO:0055065	metal ion homeostasis	11/98	680/23328	0.000100898	0.00907301	0.00751625	Alas2/Cd24a/Fech/Ank1/Atp2b4/Snca/Rhd/Lcn2/Ltf/Epb42/Tfrc	11
C9	GO:0009617	response to bacterium	13/98	974/23328	0.000158307	0.0132187	0.0109506	Hba-a1/Hba-a2/Gpx1/Cd24a/Prdx2/Mpo/Ctsg/Snca/S100a9/S100a8/Elane/Lcn2/Ltf	13
C9	GO:0002237	response to molecule of bacterial origin	8/98	389/23328	0.000191196	0.0141331	0.0117081	Cd24a/Prdx2/Ctsg/Snca/S100a9/S100a8/Elane/Ltf	8
C9	GO:0072593	reactive oxygen species metabolic process	7/98	292/23328	0.000193439	0.0141331	0.0117081	Hbb-bt/Hba-a1/Gpx1/Prdx2/Mpo/Atp2b4/Snca	7
C9	GO:0010035	response to inorganic substance	9/98	503/23328	0.000213354	0.0146712	0.0121539	Gpx1/Slc4a1/Prdx2/Mpo/Atp2b4/Snca/Lcn2/Tfrc/Pklr	9
C9	GO:0098609	cell-cell adhesion	11/98	768/23328	0.000289665	0.0188121	0.0155843	Slc4a1/Cd24a/Prdx2/Spta1/S100a9/S100a8/Add2/Elane/Tfrc/Tspan32/Sell	11
C9	GO:0031333	negative regulation of protein-containing complex assembly	5/98	147/23328	0.000340968	0.0209785	0.017379	Spta1/Sptb/Snca/Add2/Tmod1	5
C9	GO:1902904	negative regulation of supramolecular fiber organization	5/98	163/23328	0.000546823	0.0319618	0.0264777	Spta1/Sptb/Snca/Add2/Tmod1	5
C9	GO:0050900	leukocyte migration	7/98	360/23328	0.000679122	0.036097	0.0299034	Cd24a/Prtn3/S100a9/S100a8/Add2/Elane/Sell	7
C9	GO:0051494	negative regulation of cytoskeleton organization	5/98	171/23328	0.000679328	0.036097	0.0299034	Spta1/Sptb/Snca/Add2/Tmod1	5
C9	GO:0042102	positive regulation of T cell proliferation	4/98	100/23328	0.000750618	0.0364333	0.030182	Slc4a1/Cd24a/Spta1/Tfrc	4
C9	GO:0032496	response to lipopolysaccharide	7/98	368/23328	0.000772542	0.0364333	0.030182	Prdx2/Ctsg/Snca/S100a9/S100a8/Elane/Ltf	7
C9	GO:0032092	positive regulation of protein binding	4/98	101/23328	0.000779156	0.0364333	0.030182	Epb41/Spta1/Add2/Fam220a	4
C9	GO:0071695	anatomical structure maturation	6/98	273/23328	0.000884984	0.0397903	0.032963	Tal1/Epb42/Fam210b/Cdc25b/Slfn14/Rflnb	6
C9	GO:0000041	transition metal ion transport	4/98	106/23328	0.00093344	0.0404145	0.0334801	Slc25a37/Lcn2/Ltf/Tfrc	4
C9	GO:0007009	plasma membrane organization	4/98	112/23328	0.00114557	0.0478274	0.0396211	Slc4a1/Spta1/Sptb/S100a9	4
C9	GO:0071902	positive regulation of protein serine/threonine kinase activity	6/98	291/23328	0.00122878	0.0495325	0.0410336	Cd24a/Prdx2/Atp2b4/Snca/Ccnd2/Ltf	6
C11	GO:0043604	amide biosynthetic process	13/98	761/23328	1.43e-05	0.00778635	0.00677963	Elane/S100a9/Cnbp/Rpl18/Rpl11/Rpl4/Rps8/Rpl13/Eef1b2/Pa2g4/Eef1a1/Asl/Rps23	13
C11	GO:0043043	peptide biosynthetic process	12/98	649/23328	1.44e-05	0.00778635	0.00677963	Elane/S100a9/Cnbp/Rpl18/Rpl11/Rpl4/Rps8/Rpl13/Eef1b2/Pa2g4/Eef1a1/Rps23	12
C11	GO:0006518	peptide metabolic process	13/98	795/23328	2.26e-05	0.0081359	0.00708399	Elane/S100a9/Lta4h/Cnbp/Rpl18/Rpl11/Rpl4/Rps8/Rpl13/Eef1b2/Pa2g4/Eef1a1/Rps23	13
C11	GO:0034101	erythrocyte homeostasis	6/98	149/23328	3.55e-05	0.00959112	0.00835106	Cdk6/Cited2/Gpi1/Alas1/Kit/Sfxn1	6
C11	GO:0030099	myeloid cell differentiation	9/98	414/23328	5.32e-05	0.00973568	0.00847693	Prtn3/Cdk6/Cited2/Cebpe/Myb/Alas1/Kit/Tspan2/Sfxn1	9
C11	GO:0006412	translation	11/98	627/23328	5.4e-05	0.00973568	0.00847693	S100a9/Cnbp/Rpl18/Rpl11/Rpl4/Rps8/Rpl13/Eef1b2/Pa2g4/Eef1a1/Rps23	11
C11	GO:0048872	homeostasis of number of cells	8/98	330/23328	6.63e-05	0.0100255	0.00872926	Cdk6/Cited2/Myb/Gpi1/Alas1/Bcr/Kit/Sfxn1	8
C11	GO:0002444	myeloid leukocyte mediated immunity	5/98	105/23328	7.41e-05	0.0100255	0.00872926	Elane/Ctsg/Bcr/Ywhaz/Kit	5
C11	GO:0002262	myeloid cell homeostasis	6/98	187/23328	0.000124842	0.0150088	0.0130683	Cdk6/Cited2/Gpi1/Alas1/Kit/Sfxn1	6
C11	GO:0030218	erythrocyte differentiation	5/98	138/23328	0.000267436	0.0289366	0.0251953	Cdk6/Cited2/Alas1/Kit/Sfxn1	5
C11	GO:0002573	myeloid leukocyte differentiation	6/98	220/23328	0.000300631	0.0295712	0.0257478	Prtn3/Cdk6/Cited2/Cebpe/Kit/Tspan2	6
