# Supplementary material for: Fetal liver macrophages contribute to the hematopoietic stem cell niche by controlling granulopoiesis
Source: eLife. 2024 Mar 25;13:e86493. doi: 10.7554/eLife.86493 (PMC11006421; doi:10.7554/eLife.86493)
Supplement: Supplementary file 2. [file elife-86493-supp2.xlsx]

## Sheet: Sheet 1 - Table S2
Table S2
1	Ccl3
2	Il18
3	Cd86
4	Gng11
5	Calm2
6	Pdgfa
7	Gas6
8	Col4a2
9	Itgb1bp1
10	Lgals3bp
11	S100a8
12	Angpt1
13	Hp
14	Nrg2
15	Vegfb
16	Csf3
17	Gnai2
18	Mfge8
19	Ceacam1
20	Vim
21	S100a9
22	Psen1
23	Ccl7
24	Fbln1
25	Serpine2
26	Hgf
27	Sema4c
28	Anxa1
29	Tnf
30	Pltp
31	S100a4
32	Gnb4
33	Adam10
34	Il27
35	Ptpn6
36	Apoe
37	Gng2
38	Gdf15
39	Il15
40	Mif
41	Gpc3
42	Areg
43	Vcan
44	Il1rn
45	Tctn1
46	C3
47	Tfpi
48	Ccl2
49	Hspa1b
50	Cxcl10
51	Sema7a
52	Arf6
53	Ccl24
54	Mdk
55	Sema3g
56	Il6
57	Ltb
58	Hmgb1
59	Ccl9
60	Cxcl16
61	Il1b
62	Camp
63	Ctsd
64	Lgals9
65	Vasp
66	Pros1
67	Adam9
68	Egfl7
69	Pon2
70	Icam1
71	Cd160
72	Calr
73	Agtrap
74	Psap
75	Tcn2
76	Tln1
77	Bsg
78	Cfh
79	Sema6d
80	Pdgfc
81	Fn1
82	Cxcl1
83	Slpi
84	Dlk1
85	Gnb1
86	Gnb2
87	Adam15
88	Ptpn11
89	Clec2d
90	F7
91	Liph
92	Fadd
93	Gnb5
94	Tnfsf13b
95	Mmp9
96	Igfbp4
97	Il16
98	Rgmb
99	Arf4
100	C1qa
101	Kitl
102	Nrg1
103	Htra2
104	Sema6b
105	Mfng
106	Calm3
107	Trf
108	Ptn
109	Gng10
110	Tnfsf9
111	Rtn3
112	Fyn
113	Pf4
114	Ang
115	Jag1
116	Col4a1
117	Icam4
118	Nid2
119	Sytl3
120	Lcn2
121	Adam17
122	Reln
123	Efnb1
124	Osm
125	Gdf3
126	App
127	Hsp90b1
128	Lnx2
129	Ptgs2
130	Apoc1
131	Btla
132	Hras
133	Calm1
134	Cd14
135	Vcl
136	Afdn
137	Il23a
138	Selenop
139	Il1f9
140	Tnfsf14
141	Anxa2
142	Fgf11
143	Vegfa
144	Lamb1
145	Icam2
146	Hspa8
147	Cd274
148	Gng12
149	Nrg4
150	Ccl27a
151	Grn
152	Il1a
153	Cxcl2
154	Hsp90aa1
155	Tgfb1
156	Ncam1
157	Ccl6
158	Lman1
159	Flt3l
160	Cd24a
161	Ebi3
162	Icosl
163	Tnfsf12
164	Ccl12
165	L1cam
166	Ccl25
167	Angptl4
168	S100a10
169	Psen2
170	Gnas
171	Gng7
172	Selplg
173	Csf1
174	Postn
175	Nlgn2
176	St6gal1
177	Adam3
178	S100a1
179	Ptma
180	Agrn
181	Cst3
182	Vcam1
183	Ccl4
184	Bmp2
185	Sema4a
186	Spp1
187	Lgals3
188	Ada
189	Tnfsf10
190	Has2
191	Efnb2
192	F8
193	Alox5ap
194	Rtn4
195	Tgm2
196	Plau
197	Inhba
198	Lgals8
199	Cd34
200	Sema4d
201	Igf1
202	Hbegf
203	Gng5
204	Ntng2
205	Lin7c
206	Shank3
207	Thbs1
208	Pdgfb
