# Supplementary material for: Fetal liver macrophages contribute to the hematopoietic stem cell niche by controlling granulopoiesis
Source: eLife. 2024 Mar 25;13:e86493. doi: 10.7554/eLife.86493 (PMC11006421; doi:10.7554/eLife.86493)
Supplement: Supplementary file 3. [file elife-86493-supp3.xlsx]

## Sheet: Sheet 1 - Table S3 upregulated 
Table S3
	baseMean	log2FoldChange	lfcSE	stat	pvalue	padj	sig
Abcb11	6.38248	5.49539	1.7816	3.02839	0.00245859	0.0508167	Padj <0.1
Abcb4	354.555	-1.62847	0.477921	-3.19816	0.00138309	0.037206	Padj <0.1
Abcb6	637.365	-1.2185	0.339703	-3.29257	0.000992744	0.0309308	Padj <0.1
Abcd2	19.2607	2.63034	0.915011	2.76536	0.00568593	0.0815054	Padj <0.1
Abi2	435.732	0.898681	0.260142	3.07018	0.00213933	0.0475793	Padj <0.1
Abl1	1240.55	0.669532	0.194744	2.92452	0.00344985	0.061776	Padj <0.1
Acap1	700.421	1.72291	0.58693	2.76508	0.00569091	0.0815054	Padj <0.1
Acbd5	219.384	0.649454	0.203282	2.70291	0.00687345	0.0933345	Padj <0.1
Acp1	2465.04	-0.923817	0.280204	-2.94006	0.00328147	0.0600488	Padj <0.1
Acpp	28.5733	2.6721	0.816642	3.1496	0.00163494	0.0414946	Padj <0.1
Acrbp	47.8204	1.5633	0.531976	2.7507	0.00594687	0.0840631	Padj <0.1
Acsl5	3068.69	-0.837486	0.257387	-2.86528	0.00416638	0.067987	Padj <0.1
Acvr1b	141.673	1.62359	0.521681	2.92054	0.00349431	0.0622776	Padj <0.1
Acvr2b	136.256	1.08339	0.293686	3.34845	0.000812654	0.0275502	Padj <0.1
Adam33	21.4546	3.38358	0.926062	3.54574	0.000391508	0.019234	Padj <0.1
Adamts10	612.578	1.61436	0.532991	2.84125	0.00449375	0.071343	Padj <0.1
Adgrd1	16.4129	5.46224	1.49896	3.57731	0.000347144	0.0184693	Padj <0.1
Adgrl1	361.765	0.989755	0.283642	3.13689	0.00170748	0.0424547	Padj <0.1
Adsl	3328.11	-0.699063	0.222496	-2.69247	0.00709255	0.094196	Padj <0.1
Aff4	585.874	1.28678	0.26787	4.43043	9.4e-06	0.00259801	Padj <0.1
Agap1	396.218	0.795778	0.211879	3.28385	0.001024	0.0314441	Padj <0.1
Ago1	487.084	0.766578	0.248667	2.68061	0.0073488	0.0958361	Padj <0.1
Agpat2	384.417	0.946129	0.221714	3.81631	0.000135461	0.0113435	Padj <0.1
Akap13	1644.06	1.25924	0.383688	3.0213	0.00251693	0.0514677	Padj <0.1
Akip1	774.693	-1.13365	0.268521	-3.84941	0.000118401	0.0104989	Padj <0.1
Alad	5169.54	-1.53714	0.425042	-3.38117	0.000721778	0.0261167	Padj <0.1
Alas1	1077.88	-0.828588	0.156239	-4.66328	3.11e-06	0.00131487	Padj <0.1
Aldh1a3	364.623	-1.3129	0.327678	-3.70151	0.000214319	0.0143195	Padj <0.1
Aldh6a1	310.621	1.1259	0.249169	4.1173	3.83e-05	0.0060513	Padj <0.1
Alg3	1139.72	-0.96122	0.251842	-3.41969	0.000626936	0.0246738	Padj <0.1
Alpk2	578.828	-0.830712	0.255973	-2.85464	0.00430857	0.0696205	Padj <0.1
Alpk3	129.238	2.88011	0.565922	4.91254	8.99e-07	0.000717496	Padj <0.1
Amd1	2966.37	-1.03027	0.306415	-3.03597	0.00239763	0.0499158	Padj <0.1
Amz2	474.539	-0.840144	0.268447	-2.75713	0.00583103	0.0830156	Padj <0.1
Angpt1	609.435	2.36348	0.559099	4.04845	5.16e-05	0.00694348	Padj <0.1
Ankrd11	2328.31	0.655342	0.205255	2.70561	0.00681784	0.0929205	Padj <0.1
Anks1	548.825	1.01211	0.341619	2.66998	0.00758563	0.0977287	Padj <0.1
Anp32b	6980.63	-0.946598	0.299443	-2.82724	0.00469509	0.0731507	Padj <0.1
Apip	749.233	-0.829723	0.256477	-2.84518	0.00443868	0.0709251	Padj <0.1
Arap1	1127.23	1.04198	0.325504	2.8939	0.00380489	0.0649908	Padj <0.1
Arhgap27	493.736	1.26729	0.388384	3.00551	0.00265132	0.0528557	Padj <0.1
Arhgap30	393.313	1.74718	0.598876	2.75045	0.00595142	0.0840631	Padj <0.1
Arhgdig	109.397	-2.51351	0.863807	-2.79404	0.00520543	0.0776145	Padj <0.1
Arhgef11	104.888	2.24947	0.599066	3.58804	0.000333175	0.0179253	Padj <0.1
Arhgef2	1381.03	0.849056	0.251756	2.97532	0.0029268	0.056058	Padj <0.1
Arid5a	307.967	1.2463	0.373244	3.07117	0.00213222	0.0475793	Padj <0.1
Arl5b	372.398	0.991515	0.257941	3.45627	0.000547705	0.0232775	Padj <0.1
Arl6ip4	1324.29	-0.776577	0.180718	-3.74383	0.000181236	0.0132609	Padj <0.1
Arsk	123.717	0.937254	0.285692	2.93061	0.00338292	0.0613098	Padj <0.1
Asb13	152.003	1.12082	0.383126	2.66445	0.00771149	0.0987305	Padj <0.1
Asf1a	941.085	-1.01332	0.254407	-3.58999	0.000330687	0.0179253	Padj <0.1
Asf1b	2142.17	-1.02589	0.348189	-2.65915	0.00783371	0.0990802	Padj <0.1
Ash1l	831.054	1.38556	0.197013	6.52524	6.79e-11	2.44e-07	Padj <0.1
Asns	3223.57	-1.34656	0.444236	-2.80608	0.00501475	0.0763912	Padj <0.1
Astn1	49.5873	2.01075	0.68657	2.78304	0.00538515	0.0787757	Padj <0.1
Asxl3	14.86	3.63022	1.19717	2.94881	0.00318996	0.0590513	Padj <0.1
Atf7	599.51	0.698472	0.221773	2.69857	0.00696374	0.0938372	Padj <0.1
Atf7ip	2018.03	0.725087	0.215069	2.90645	0.00365555	0.0638055	Padj <0.1
Atg3	1013.44	-0.877962	0.23132	-3.36314	0.000770618	0.0270658	Padj <0.1
Atn1	210.662	1.23124	0.353079	3.20394	0.00135561	0.0366305	Padj <0.1
Atp10d	207.175	1.31093	0.403839	2.99854	0.00271278	0.0534555	Padj <0.1
Atp2a3	1013.83	1.91127	0.591211	3.06367	0.00218643	0.04763	Padj <0.1
Atp5g1	8673.03	-1.08612	0.310192	-3.17905	0.0014776	0.0387331	Padj <0.1
Atp5k	2038.55	-0.953724	0.249268	-3.42492	0.000614974	0.0244712	Padj <0.1
Atp5l	2459.65	-0.655304	0.200527	-2.76922	0.00561912	0.0809616	Padj <0.1
Atp5o	9310.42	-1.00265	0.315057	-2.86504	0.00416962	0.067987	Padj <0.1
Atp6v0e	2673.44	-0.597101	0.186719	-2.66229	0.00776112	0.0990802	Padj <0.1
Atp6v0e2	747.707	-1.59909	0.402361	-3.72573	0.000194749	0.0137136	Padj <0.1
Atp7b	576.612	-1.52436	0.480397	-2.96497	0.00302717	0.0571422	Padj <0.1
Atpif1	7216.09	-1.08249	0.268811	-3.65495	0.000257231	0.0155857	Padj <0.1
Atrip	1776.68	-1.17656	0.285778	-3.76712	0.000165144	0.0125518	Padj <0.1
Atrx	1683.03	0.940762	0.26443	3.17952	0.00147518	0.0387331	Padj <0.1
AU019990	8.78421	3.50261	1.11575	3.04963	0.00229126	0.0486598	Padj <0.1
Aurkaip1	1465.93	-0.807144	0.244541	-2.89172	0.00383145	0.0652891	Padj <0.1
AW549877	373.174	1.03402	0.351831	2.65473	0.00793728	0.0995799	Padj <0.1
B4galnt1	146.567	-1.67304	0.531996	-2.95687	0.00310779	0.0582052	Padj <0.1
Bach2	191.779	1.28254	0.440669	2.68351	0.00728531	0.0955171	Padj <0.1
Bag1	927.545	-1.13233	0.276798	-3.72953	0.000191838	0.0136423	Padj <0.1
Baz2a	654.71	0.944144	0.237583	3.55305	0.00038079	0.019234	Padj <0.1
Bbln	182.712	-0.812531	0.265438	-2.68436	0.0072668	0.0955055	Padj <0.1
Bbs12	132.186	-1.45503	0.427148	-3.17228	0.00151248	0.039218	Padj <0.1
BC003965	916.612	-1.04674	0.280693	-3.37287	0.000743893	0.0266485	Padj <0.1
Bcas2	2198.49	-0.987497	0.22451	-3.95304	7.72e-05	0.00908579	Padj <0.1
Bccip	1691.98	-0.879722	0.221641	-3.51795	0.000434898	0.0204161	Padj <0.1
Bcl2	287.867	1.08992	0.328102	3.01711	0.00255193	0.0517775	Padj <0.1
Bcl7c	343.627	1.08861	0.28491	3.46989	0.000520663	0.0226646	Padj <0.1
Bcl9	241.346	2.42883	0.443871	5.24665	1.55e-07	0.0002225	Padj <0.1
Birc6	1613.58	0.66332	0.186344	3.02302	0.0025027	0.0513444	Padj <0.1
Blvra	860.509	-0.973821	0.219616	-3.97886	6.92e-05	0.00872582	Padj <0.1
Blvrb	4656.91	-1.67316	0.512107	-3.07194	0.00212675	0.0475793	Padj <0.1
Bmpr2	583.438	0.866012	0.270434	2.83253	0.0046181	0.0724961	Padj <0.1
Bola1	549.262	-1.09605	0.319257	-3.11991	0.00180904	0.0438967	Padj <0.1
Bola2	1075.84	-0.752249	0.246012	-2.65129	0.0080185	0.0999009	Padj <0.1
Braf	337.888	1.20059	0.232043	4.74306	2.11e-06	0.00100803	Padj <0.1
Brcc3	1074.42	-0.843572	0.240318	-3.09411	0.00197402	0.0459591	Padj <0.1
Brd7	1245.28	-0.770867	0.23025	-2.91365	0.00357231	0.0631197	Padj <0.1
Brdt	16.2711	2.13326	0.608394	3.34201	0.000831746	0.0276575	Padj <0.1
Brix1	1444.11	-0.996283	0.287183	-3.12095	0.00180271	0.0438967	Padj <0.1
Brwd3	70.8533	1.32078	0.451922	2.70131	0.00690665	0.09351	Padj <0.1
Btc	19.1024	2.46292	0.676414	3.4933	0.000477086	0.0216433	Padj <0.1
Cacna2d4	25.084	2.3165	0.65236	3.39767	0.000679632	0.0255573	Padj <0.1
Cacybp	2259.06	-1.15232	0.324741	-3.24049	0.00119323	0.0338083	Padj <0.1
Calm3	2507.93	-0.59826	0.173892	-2.86534	0.00416564	0.067987	Padj <0.1
Camk2d	641.421	1.069	0.312955	3.09628	0.00195966	0.0459224	Padj <0.1
Camkk2	320.619	1.01863	0.274559	3.34585	0.00082031	0.0275502	Padj <0.1
Cand2	454.732	1.34137	0.338896	3.66299	0.00024929	0.0155698	Padj <0.1
Car1	111.726	-2.02013	0.621445	-3.08978	0.00200304	0.0463344	Padj <0.1
Carnmt1	230.973	-1.44548	0.441938	-3.04449	0.00233071	0.049164	Padj <0.1
Casc1	10.3054	5.4826	1.407	3.82558	0.000130465	0.011225	Padj <0.1
Castor2	201.125	1.40269	0.415903	3.13219	0.00173506	0.0425327	Padj <0.1
Cblb	249.758	1.02634	0.308912	2.99871	0.00271124	0.0534555	Padj <0.1
Cbx6	579.673	1.17437	0.313989	3.42167	0.000622367	0.0246289	Padj <0.1
Cbx7	156.59	1.65669	0.449264	3.46499	0.000530253	0.0228741	Padj <0.1
Ccdc112	20.2574	2.119	0.684825	2.9482	0.00319634	0.0590933	Padj <0.1
Ccdc167	448.181	-0.602963	0.177649	-2.83121	0.0046372	0.0725636	Padj <0.1
Ccdc187	29.0091	1.67404	0.477529	3.29623	0.000979924	0.030735	Padj <0.1
Ccdc60	55.577	2.05127	0.648012	3.01116	0.00260255	0.0522162	Padj <0.1
Ccdc78	36.0098	1.28476	0.418317	2.83221	0.00462279	0.0724961	Padj <0.1
Ccn1	370.853	1.51889	0.50156	2.82895	0.00467012	0.0729198	Padj <0.1
Ccnb1	5355.03	-0.91146	0.229481	-3.53607	0.000406124	0.0195771	Padj <0.1
Ccnb2	2692.6	-0.752628	0.167878	-3.88751	0.000101277	0.00996464	Padj <0.1
Ccne1	1629.97	-1.46754	0.333776	-4.09717	4.18e-05	0.0063913	Padj <0.1
Ccng2	280.187	1.13746	0.354533	2.92627	0.00343055	0.061523	Padj <0.1
Ccnt1	1383.25	0.865633	0.224974	3.4032	0.000666016	0.0253775	Padj <0.1
Cct5	11629.4	-0.825904	0.235937	-3.07668	0.0020932	0.0474272	Padj <0.1
Cct7	11450.6	-0.791911	0.236961	-2.91994	0.00350097	0.0623189	Padj <0.1
Cct8	8140.29	-0.839845	0.250083	-2.9584	0.00309245	0.0580693	Padj <0.1
Ccz1	825.692	-1.08242	0.296003	-3.31896	0.00090354	0.0291571	Padj <0.1
Cd247	11.3112	3.65631	1.30352	2.72824	0.00636734	0.0878645	Padj <0.1
Cd274	145.652	1.64847	0.53473	2.8958	0.0037819	0.0649069	Padj <0.1
Cd300lb	16.8078	-4.3218	1.37825	-3.06316	0.00219015	0.04763	Padj <0.1
Cd300lf	58.5046	1.74404	0.550612	2.98584	0.00282802	0.05475	Padj <0.1
Cd34	2768.59	0.92608	0.238229	3.46759	0.000525149	0.0227908	Padj <0.1
Cdc123	2209.83	-0.82821	0.20174	-3.60964	0.000306622	0.0173371	Padj <0.1
Cdc14a	134.091	1.48094	0.447493	3.08595	0.00202901	0.0466347	Padj <0.1
Cdc42bpg	9.01498	2.98645	1.07431	2.6868	0.00721402	0.0950728	Padj <0.1
Cdc45	922.377	-0.798069	0.258609	-2.69932	0.00694816	0.0938067	Padj <0.1
Cdh13	76.664	-2.92548	0.627415	-4.50337	6.69e-06	0.00208567	Padj <0.1
Cdh17	6.67069	3.0038	1.0133	2.86569	0.00416105	0.067987	Padj <0.1
Cdk2ap2	1432.27	-0.885754	0.220574	-3.56231	0.000367608	0.0190602	Padj <0.1
Cdkn1a	513.674	1.316	0.417964	2.90934	0.00362192	0.0634499	Padj <0.1
Cdpf1	633.089	-1.02121	0.280778	-3.2809	0.00103477	0.0316265	Padj <0.1
Cenpv	111.58	-1.51588	0.426878	-3.31683	0.000910442	0.0292584	Padj <0.1
Cenpx	1389.65	-0.745949	0.214519	-3.01115	0.00260263	0.0522162	Padj <0.1
Cep68	830.997	0.917973	0.274399	2.98096	0.00287346	0.055315	Padj <0.1
Ces2b	77.9251	2.65489	0.679968	3.75737	0.000171711	0.0129143	Padj <0.1
Cfap54	28.1938	1.79533	0.544732	3.11222	0.00185688	0.0443091	Padj <0.1
Cfap69	84.0564	1.51006	0.514038	2.7431	0.00608624	0.0852132	Padj <0.1
Cfap97	313.85	0.888958	0.215648	3.65855	0.000253642	0.0155857	Padj <0.1
Chchd1	1064.65	-0.883384	0.241681	-3.24139	0.00118946	0.0338083	Padj <0.1
Chchd3	1424.61	-0.848273	0.232658	-3.21619	0.00129903	0.0354907	Padj <0.1
Chchd4	1332.64	-1.01003	0.305676	-2.97711	0.0029098	0.0558068	Padj <0.1
Chd6	611.507	0.916453	0.219074	3.72683	0.000193903	0.0137136	Padj <0.1
Chka	560.797	0.78413	0.219629	3.11493	0.00183987	0.0441232	Padj <0.1
Chml	65.77	1.1396	0.373089	2.78647	0.00532852	0.0785875	Padj <0.1
Chmp3	1410.76	-0.696904	0.176443	-3.38298	0.00071705	0.0261167	Padj <0.1
Chrna1	83.7025	-1.29547	0.377319	-3.16833	0.00153318	0.0394149	Padj <0.1
Chrnb4	19.1011	4.70057	1.16234	3.95804	7.56e-05	0.0090309	Padj <0.1
Churc1	3744.21	-1.14724	0.308091	-3.39912	0.000676025	0.0254885	Padj <0.1
Ciao2b	744.722	-0.737982	0.19054	-3.34829	0.000813126	0.0275502	Padj <0.1
Ciao3	699.25	-0.609437	0.191431	-2.66121	0.00778614	0.0990802	Padj <0.1
Cinp	1226.45	-1.03835	0.269556	-3.48109	0.000499368	0.0221402	Padj <0.1
Cirbp	536.388	0.961655	0.312313	2.75895	0.00579873	0.0826377	Padj <0.1
Cisd1	1018.3	-0.949733	0.218516	-3.88866	0.000100799	0.00996464	Padj <0.1
Clasrp	361.968	1.05363	0.31371	3.03985	0.00236693	0.0497005	Padj <0.1
Clcf1	58.6305	4.42639	0.886077	4.88263	1.05e-06	0.000751868	Padj <0.1
Clec4e	135.378	2.42996	0.6148	3.78979	0.000150777	0.0117712	Padj <0.1
Clec7a	27.1525	-3.59999	1.01964	-3.43256	0.000597905	0.02426	Padj <0.1
Clnk	5.55413	5.33285	1.97299	2.65224	0.00799599	0.0998315	Padj <0.1
Clock	193.66	1.51959	0.487681	2.91089	0.00360395	0.0633928	Padj <0.1
Clptm1l	1584.9	-0.989292	0.2539	-3.50252	0.000460873	0.0212876	Padj <0.1
Clybl	581.694	-1.14874	0.331865	-3.16014	0.00157695	0.0404516	Padj <0.1
Cmc2	658.793	-0.889509	0.287886	-2.74244	0.00609855	0.0853024	Padj <0.1
Cmpk2	261.129	-1.39715	0.366078	-3.54338	0.00039503	0.019234	Padj <0.1
Cmss1	314.63	-1.15824	0.278213	-3.80368	0.00014256	0.0115023	Padj <0.1
Coa3	2363.88	-1.0355	0.280592	-3.33404	0.000855955	0.0282662	Padj <0.1
Cog5	488.573	1.12663	0.350698	2.92739	0.00341815	0.0613924	Padj <0.1
Col14a1	85.5933	2.37715	0.625128	3.6427	0.000269794	0.0158891	Padj <0.1
Col18a1	1428.28	1.53585	0.508328	2.82466	0.00473314	0.0736186	Padj <0.1
Col5a1	170.431	-1.59606	0.380792	-3.9288	8.54e-05	0.00929046	Padj <0.1
Cop1	631.065	-0.676558	0.211357	-2.72789	0.00637412	0.0878736	Padj <0.1
Cope	5170.15	-0.64359	0.187816	-2.89427	0.00380036	0.0649908	Padj <0.1
Coro7	1102.09	1.17125	0.354863	3.01878	0.00253799	0.0516698	Padj <0.1
Cox17	1838.72	-1.24031	0.247961	-4.59875	4.25e-06	0.00152644	Padj <0.1
Cox4i1	10235.4	-0.577255	0.167924	-2.84209	0.00448195	0.0713368	Padj <0.1
Cox5a	2320.16	-0.657617	0.179073	-3.11391	0.00184627	0.0442029	Padj <0.1
Cox5b	5406.61	-0.767799	0.22041	-3.02981	0.00244712	0.0506525	Padj <0.1
Cox7a2	3770.33	-0.68435	0.191968	-3.044	0.00233455	0.0491728	Padj <0.1
Cox7c	1996.67	-0.845963	0.237247	-3.14425	0.00166512	0.0420938	Padj <0.1
Cpox	1675.42	-1.67769	0.541569	-2.91318	0.00357771	0.0631374	Padj <0.1
Cpt1c	51.5639	2.03438	0.574173	3.36898	0.000754459	0.0268928	Padj <0.1
Creb5	29.1324	1.79525	0.605032	2.80192	0.00507997	0.0768955	Padj <0.1
Creld1	296.008	0.786469	0.207574	3.30711	0.000942653	0.0300249	Padj <0.1
Crtc1	375.77	1.22215	0.393735	2.85001	0.00437185	0.0702659	Padj <0.1
Csf2rb	358.663	1.87001	0.658428	2.68824	0.00718291	0.0948369	Padj <0.1
Csnk1g1	349.439	1.18737	0.224183	4.85037	1.23e-06	0.000760471	Padj <0.1
Ctnnal1	547.585	1.14816	0.390791	2.68215	0.00731516	0.0957862	Padj <0.1
Cux1	1022.3	0.837978	0.229518	3.21533	0.00130294	0.0354907	Padj <0.1
Cwf19l2	233.914	0.814066	0.237856	3.0021	0.00268126	0.0531259	Padj <0.1
Cycs	695.109	-0.789273	0.229348	-3.00536	0.00265267	0.0528557	Padj <0.1
Cyp2j9	71.0059	2.3456	0.720482	3.1168	0.00182824	0.0440649	Padj <0.1
Dach2	34.6887	2.53561	0.873098	2.78962	0.00527703	0.0780685	Padj <0.1
Dazap2	6506.78	-0.436953	0.119704	-2.81489	0.0048794	0.0753683	Padj <0.1
Dbil5	5.18528	4.48524	1.54582	2.83683	0.00455632	0.0719247	Padj <0.1
Dct	194.09	-1.22424	0.325641	-3.4524	0.000555621	0.0234489	Padj <0.1
Dcun1d5	476.173	-0.769546	0.225286	-2.97199	0.00295879	0.0564449	Padj <0.1
Ddx18	1732.95	-0.904128	0.259328	-3.10081	0.00192993	0.0453505	Padj <0.1
Ddx39a	7848.72	-1.12105	0.313197	-3.26011	0.0011137	0.032496	Padj <0.1
Ddx4	96.1527	1.7924	0.540179	3.13304	0.00173009	0.0424832	Padj <0.1
Ddx51	411.072	-0.986455	0.275726	-3.21499	0.00130449	0.0354907	Padj <0.1
Dennd1a	253.559	0.726865	0.225173	2.78393	0.00537041	0.0786952	Padj <0.1
Dennd1c	412.564	2.1764	0.621869	3.33896	0.000840914	0.0278978	Padj <0.1
Dennd4c	182.588	1.06753	0.246471	3.92553	8.65e-05	0.00934692	Padj <0.1
Dgat1	502.919	1.26375	0.36011	3.23165	0.0012308	0.0346516	Padj <0.1
Dgkk	29.8112	4.06405	1.02666	3.8611	0.000112879	0.0104529	Padj <0.1
Diaph2	82.6418	2.12088	0.470061	4.29918	1.71e-05	0.0039962	Padj <0.1
Disc1	28.4678	2.25644	0.625635	3.44681	0.000567252	0.0235508	Padj <0.1
Dkc1	3816.9	-0.816573	0.265626	-2.69768	0.00698249	0.0938372	Padj <0.1
Dkk1	65.2748	2.81017	0.533814	5.07699	3.83e-07	0.000423721	Padj <0.1
Dld	1228.76	-0.744968	0.239166	-2.69673	0.00700237	0.0938372	Padj <0.1
Dlg4	40.3105	1.72611	0.590517	2.75371	0.00589237	0.0836992	Padj <0.1
Dmxl1	186.662	0.834444	0.252897	2.90412	0.00368288	0.0640491	Padj <0.1
Dnajb14	1551.45	-0.823145	0.238583	-3.031	0.00243744	0.0505319	Padj <0.1
Dnajc15	641.287	-0.687378	0.217588	-2.6995	0.00694432	0.0938067	Padj <0.1
Dnajc19	983.647	-0.971177	0.254837	-3.41857	0.000629521	0.0246791	Padj <0.1
Dnase1	39.6401	2.64504	0.659714	3.85779	0.000114418	0.0104529	Padj <0.1
Dnmt3a	2099.13	1.11822	0.342346	2.97423	0.00293724	0.0561829	Padj <0.1
Dnmt3b	1647.23	1.1512	0.337094	3.11841	0.00181831	0.0439177	Padj <0.1
Dock2	1359.03	1.68651	0.515061	3.08024	0.00206833	0.0470865	Padj <0.1
Dock4	132.761	1.63457	0.557814	2.75105	0.00594044	0.0840631	Padj <0.1
Dpep2	78.4896	-1.44305	0.469718	-2.85926	0.00424635	0.0687698	Padj <0.1
Dpy19l1	758.222	-0.758267	0.244293	-2.69458	0.00704764	0.0941762	Padj <0.1
Dpy19l3	342.595	1.50014	0.351789	3.98007	6.89e-05	0.00872582	Padj <0.1
Dst	236.273	1.03744	0.244873	3.82829	0.000129039	0.011225	Padj <0.1
Dtwd1	302.808	-1.19051	0.390472	-2.7928	0.00522539	0.0776243	Padj <0.1
Dtx3l	353.195	1.0293	0.271947	3.4172	0.000632689	0.0246972	Padj <0.1
Dusp2	410.56	1.46028	0.296761	4.58374	4.57e-06	0.0016002	Padj <0.1
Dusp4	57.8375	2.13441	0.723386	2.81235	0.00491811	0.0754793	Padj <0.1
Dusp5	424.778	1.93645	0.663635	2.76727	0.00565283	0.0812842	Padj <0.1
Dynlt1a	901.687	-0.823434	0.221597	-3.26464	0.00109604	0.0324943	Padj <0.1
E2f4	1875.59	-0.984037	0.251041	-3.52148	0.00042914	0.0202118	Padj <0.1
Ecsit	965.802	-0.924493	0.270633	-3.04653	0.00231499	0.0489748	Padj <0.1
Eda	37.2335	2.95782	0.795163	3.594	0.000325639	0.0179207	Padj <0.1
Edf1	1734.67	-0.68869	0.21003	-2.80289	0.00506475	0.076863	Padj <0.1
Eed	681.218	-0.900966	0.285289	-2.80757	0.00499175	0.0762008	Padj <0.1
Eef1d	5159.07	-0.786128	0.234353	-2.92776	0.00341413	0.0613924	Padj <0.1
Eef1e1	1051.22	-1.25454	0.330813	-3.49001	0.000482995	0.0217499	Padj <0.1
Eef1g	17263.6	-0.691879	0.202192	-2.92732	0.003419	0.0613924	Padj <0.1
Efhc1	25.5805	2.88704	0.74486	3.7417	0.000182781	0.0132609	Padj <0.1
Egr1	1222.8	1.82056	0.59424	2.8954	0.00378673	0.0649122	Padj <0.1
Eif1ad	1850.74	-0.756521	0.223852	-2.93284	0.00335877	0.060997	Padj <0.1
Eif2b1	2433.38	-1.01558	0.269256	-3.40042	0.000672819	0.0254885	Padj <0.1
Eif2b3	1002.08	-1.13918	0.275712	-3.76906	0.000163863	0.0125518	Padj <0.1
Eif2b5	1444.07	-1.01337	0.250747	-3.64261	0.000269888	0.0158891	Padj <0.1
Eif2s1	3310.49	-1.00101	0.266444	-3.38161	0.000720614	0.0261167	Padj <0.1
Eif2s2	3568.2	-0.665255	0.211987	-2.66646	0.00766549	0.09843	Padj <0.1
Eif3b	3483.58	-0.891483	0.225474	-3.5103	0.000447601	0.0208633	Padj <0.1
Eif3d	3891.28	-0.809656	0.211007	-3.36319	0.000770484	0.0270658	Padj <0.1
Eif3g	4724.36	-0.845952	0.26315	-2.8347	0.00458684	0.0721687	Padj <0.1
Eif3j2	762.695	-0.963348	0.221423	-3.89908	9.66e-05	0.00985681	Padj <0.1
Eif3k	4445.96	-0.624319	0.147842	-3.54647	0.000390429	0.019234	Padj <0.1
Eif3l	4974.22	-0.656981	0.165096	-3.37367	0.000741725	0.0266372	Padj <0.1
Elf4	495.983	1.25163	0.337637	3.41086	0.000647576	0.0250065	Padj <0.1
Elmo1	1334.86	1.63461	0.48813	3.14386	0.00166734	0.0420938	Padj <0.1
Elof1	1591.06	-0.734018	0.204842	-3.09516	0.00196707	0.0459591	Padj <0.1
Elovl1	2340.46	-0.909809	0.211686	-3.82552	0.000130496	0.011225	Padj <0.1
Emc4	1516.59	-0.729469	0.234386	-2.68561	0.00723983	0.0953255	Padj <0.1
Emc9	277.858	-1.52038	0.504417	-2.81588	0.00486442	0.0752178	Padj <0.1
Emg1	3802.93	-0.786254	0.238759	-2.87425	0.00404984	0.067218	Padj <0.1
Eml6	17.7698	2.29272	0.813717	2.69469	0.00704539	0.0941762	Padj <0.1
Emsy	635.684	0.845026	0.258675	2.88016	0.00397477	0.0667808	Padj <0.1
Enah	432.491	-1.10524	0.344558	-2.91748	0.00352869	0.0625027	Padj <0.1
Epb41l4b	76.5418	3.14489	0.652482	4.66662	3.06e-06	0.00131487	Padj <0.1
Epdr1	531.628	-1.95847	0.575754	-3.22789	0.00124707	0.0348526	Padj <0.1
Epor	1196.05	-1.01249	0.320771	-2.84468	0.00444556	0.0709561	Padj <0.1
Eps15l1	1033.43	0.574325	0.164637	2.88104	0.00396369	0.0667507	Padj <0.1
Erc1	530.995	0.86892	0.232559	3.30635	0.000945202	0.0300394	Padj <0.1
Erh	4520.56	-0.857914	0.247164	-3.06645	0.00216618	0.04763	Padj <0.1
Erp27	15.6956	3.24036	0.825642	3.80354	0.000142643	0.0115023	Padj <0.1
Etfa	2250.27	-0.745012	0.192827	-3.34502	0.000822767	0.0275502	Padj <0.1
Etnk1	961.021	0.729077	0.200554	3.1367	0.00170861	0.0424547	Padj <0.1
Etv3	262.92	1.20076	0.353001	3.11828	0.00181908	0.0439177	Padj <0.1
Etv5	329.133	1.21524	0.382179	2.91811	0.00352159	0.0625027	Padj <0.1
Exoc4	889.869	0.820041	0.181545	3.96617	7.3e-05	0.00898166	Padj <0.1
Exosc1	910.598	-1.00429	0.284269	-3.18112	0.00146707	0.0386687	Padj <0.1
Exosc2	2459.78	-0.795753	0.24906	-2.79352	0.00521385	0.0776145	Padj <0.1
Exosc3	920.159	-0.891588	0.25834	-3.06413	0.00218302	0.04763	Padj <0.1
Exosc4	1244.45	-0.649879	0.19848	-2.77045	0.00559796	0.0809001	Padj <0.1
Exosc7	2956.03	-1.01826	0.300515	-3.05561	0.002246	0.0482268	Padj <0.1
Exosc8	2118.95	-1.05533	0.310741	-3.07436	0.00210957	0.0475793	Padj <0.1
Exosc9	1383.88	-1.01074	0.309377	-2.94378	0.00324229	0.0594833	Padj <0.1
Eya1	95.9065	2.71136	0.627329	4.16267	3.15e-05	0.00524353	Padj <0.1
F9	6.09293	5.4526	1.85925	2.8789	0.00399068	0.0668137	Padj <0.1
Faf1	690.21	-0.907796	0.302697	-2.66866	0.00761546	0.0980251	Padj <0.1
Fam136a	1771.45	-0.962005	0.305741	-2.8194	0.00481137	0.074558	Padj <0.1
Fam168a	557.777	0.780952	0.232866	2.92421	0.00345327	0.061776	Padj <0.1
Fam184a	28.7093	2.30904	0.767214	2.8793	0.00398559	0.0668063	Padj <0.1
Fam217b	120.539	1.59466	0.44411	3.36553	0.000763972	0.027061	Padj <0.1
Fam229b	31.5619	1.89938	0.496704	3.62264	0.00029161	0.0167523	Padj <0.1
Fam241a	99.9972	-1.3999	0.452202	-2.8746	0.00404545	0.067218	Padj <0.1
Fam71e1	20.6903	2.14523	0.744522	2.74703	0.00601375	0.0846107	Padj <0.1
Fam76b	246.514	0.751661	0.243804	2.67288	0.00752026	0.0972355	Padj <0.1
Fan1	30.0776	2.16364	0.695712	2.96623	0.00301476	0.0571422	Padj <0.1
Farp2	32.4859	3.0703	0.807146	3.68	0.000233237	0.0149427	Padj <0.1
Fau	2078.15	-1.03926	0.226841	-4.1406	3.46e-05	0.00552935	Padj <0.1
Fcf1	2499.32	-1.02335	0.272847	-3.38414	0.000714018	0.0261167	Padj <0.1
Fcho2	572.382	0.963386	0.289418	2.98318	0.00285272	0.0550797	Padj <0.1
Fchsd2	754.816	0.965674	0.307611	2.81418	0.00489013	0.0753914	Padj <0.1
Fcna	68.0005	-5.03422	1.84053	-2.68086	0.00734327	0.0958361	Padj <0.1
Fgf11	34.3977	2.66098	0.808334	3.16822	0.00153377	0.0394149	Padj <0.1
Fgfr3	85.8132	2.08047	0.444171	4.45879	8.24e-06	0.00232156	Padj <0.1
Fhl4	11.0971	6.31371	1.61116	3.85668	0.000114939	0.0104529	Padj <0.1
Flywch2	53.0605	1.86361	0.509993	3.45811	0.000543979	0.0232155	Padj <0.1
Fmc1	613.116	-0.944431	0.300604	-2.80911	0.00496789	0.0759188	Padj <0.1
Fndc3a	465.173	0.67035	0.213584	2.67038	0.00757653	0.0977287	Padj <0.1
Fosb	158.797	2.72437	0.690885	3.79857	0.000145536	0.0115504	Padj <0.1
Fosl2	832.239	2.7821	0.544319	4.92745	8.33e-07	0.000708526	Padj <0.1
Foxk1	171.64	1.10005	0.369671	2.70524	0.00682554	0.0929374	Padj <0.1
Foxp1	1343.04	0.730018	0.23531	2.67739	0.00741972	0.0965437	Padj <0.1
Frs2	224.984	1.03489	0.32449	2.88111	0.00396278	0.0667507	Padj <0.1
Fsd1l	37.3336	2.7691	0.597729	4.4654	7.99e-06	0.00232156	Padj <0.1
Fsd2	17.2643	4.06389	1.34787	2.94085	0.0032731	0.059972	Padj <0.1
Fth1	38152.2	-0.880542	0.293749	-2.65717	0.00787995	0.0991975	Padj <0.1
Fus	1958.54	0.854715	0.206149	3.66102	0.000251208	0.0155857	Padj <0.1
Fut2	27.279	2.86264	0.856319	3.22618	0.00125454	0.0349253	Padj <0.1
Fxr1	963.452	-0.952977	0.259969	-3.28107	0.00103412	0.0316265	Padj <0.1
Fxyd7	32.1604	2.2607	0.803573	2.68887	0.00716943	0.0947459	Padj <0.1
Fyco1	485.134	0.821149	0.258496	2.78979	0.00527429	0.0780685	Padj <0.1
Fzd3	59.7597	1.75976	0.555033	2.99038	0.00278627	0.0541488	Padj <0.1
Gadd45gip1	1332.38	-0.866388	0.228357	-3.35609	0.000790514	0.0275502	Padj <0.1
Gan	311.832	0.917149	0.26421	3.09281	0.00198274	0.0460875	Padj <0.1
Gar1	411.054	-0.776918	0.228739	-2.95935	0.00308289	0.0580415	Padj <0.1
Gata2	603.744	1.26743	0.404868	2.88349	0.00393297	0.0664672	Padj <0.1
Gata3	223.968	1.59574	0.450052	3.32347	0.000889044	0.0288354	Padj <0.1
Gck	72.805	2.99111	0.937661	3.08332	0.00204707	0.0468716	Padj <0.1
Gcnt4	12.9476	4.24609	1.41482	2.93047	0.00338452	0.0613098	Padj <0.1
Gdf11	70.3354	1.50349	0.490752	2.85988	0.00423795	0.0687113	Padj <0.1
Gdf2	30.4314	3.79824	1.25546	2.94571	0.00322209	0.0594164	Padj <0.1
Gem	680.522	1.98637	0.496285	3.80097	0.000144129	0.0115023	Padj <0.1
Gemin6	769.335	-1.27304	0.301122	-3.89556	9.8e-05	0.00985681	Padj <0.1
Gigyf1	316.551	1.35001	0.416149	3.00376	0.00266668	0.0529833	Padj <0.1
Gimap7	14.8524	5.3106	1.3526	3.8523	0.000117015	0.0104989	Padj <0.1
Gins1	456.639	-0.966014	0.265231	-3.26513	0.00109412	0.0324943	Padj <0.1
Git2	1901.82	0.74392	0.155514	4.14058	3.46e-05	0.00552935	Padj <0.1
Glo1	2992.82	-0.645042	0.183516	-2.96999	0.00297807	0.0566944	Padj <0.1
Glrx5	2055.38	-2.02408	0.413612	-4.65191	3.29e-06	0.00134901	Padj <0.1
Gna13	905.173	0.603459	0.153938	3.27054	0.00107342	0.0323263	Padj <0.1
Gpr132	191.076	1.76936	0.517365	3.22665	0.00125248	0.0349253	Padj <0.1
Gpr161	17.7765	4.64428	1.23516	3.67911	0.000234048	0.0149427	Padj <0.1
Gpr89	700.514	-1.06782	0.286392	-3.37934	0.000726588	0.0262247	Padj <0.1
Gps2	1213.57	-0.916533	0.226419	-3.60629	0.00031061	0.0173917	Padj <0.1
Gramd1a	1415.72	1.30297	0.365921	3.28751	0.00101076	0.0312922	Padj <0.1
Gramd1b	57.7844	2.18727	0.58263	3.58249	0.000340333	0.0182421	Padj <0.1
Gria3	74.5771	2.01216	0.424262	4.50703	6.57e-06	0.00208567	Padj <0.1
Grik4	9.00727	3.23721	1.09524	2.86439	0.00417816	0.0680175	Padj <0.1
Grk3	278.965	2.5313	0.630724	3.85478	0.000115834	0.0104651	Padj <0.1
Grsf1	660.77	-0.929243	0.258259	-3.21089	0.00132325	0.0359329	Padj <0.1
Gspt1	1477.52	-1.0779	0.268738	-3.63885	0.000273861	0.0159272	Padj <0.1
Gstp1	5659.16	-0.828148	0.185047	-3.93493	8.32e-05	0.00918676	Padj <0.1
Gtf2h5	1322.19	-0.615588	0.193478	-2.66484	0.00770254	0.0987038	Padj <0.1
Gtpbp4	6104.76	-1.17928	0.304661	-3.54257	0.000396249	0.019234	Padj <0.1
Gucy1a1	319.506	1.676	0.56346	2.797	0.00515797	0.0773426	Padj <0.1
Gvin1	202.854	1.99722	0.618967	3.06515	0.00217562	0.04763	Padj <0.1
H2.Ke6	419.359	-1.00899	0.268507	-3.38535	0.000710867	0.0261166	Padj <0.1
H2.T10	49.6865	1.87836	0.560911	3.17049	0.00152182	0.0393182	Padj <0.1
H2aj	905.035	-0.968792	0.238154	-3.64802	0.000264266	0.0156867	Padj <0.1
H2az1	13572	-0.75081	0.234209	-2.77875	0.0054568	0.0797425	Padj <0.1
H2bc8	155.252	1.79542	0.590365	2.87181	0.00408125	0.0675428	Padj <0.1
H4c12	7.83031	3.72744	1.291	2.80979	0.00495745	0.0759133	Padj <0.1
H6pd	470.415	0.820248	0.267075	2.6968	0.00700091	0.0938372	Padj <0.1
Haghl	358.883	1.19407	0.3864	2.83143	0.00463399	0.0725636	Padj <0.1
Hat1	1543.1	-0.820684	0.2649	-2.72059	0.00651649	0.0893219	Padj <0.1
Hax1	1478.21	-0.79769	0.200192	-3.48511	0.000491939	0.021919	Padj <0.1
Hdac9	59.7959	1.83382	0.515882	3.36089	0.000776926	0.0272208	Padj <0.1
Hdgf	4328.98	-1.03496	0.348423	-2.68341	0.00728763	0.0955171	Padj <0.1
Hdgfl3	127.352	1.11795	0.383133	2.65691	0.00788608	0.0991975	Padj <0.1
Heatr5a	836.574	0.75262	0.245441	2.65897	0.00783796	0.0990802	Padj <0.1
Hebp1	836.516	-1.47871	0.5044	-2.73337	0.00626895	0.0872611	Padj <0.1
Hectd2	14.5584	2.01485	0.667499	2.86869	0.00412175	0.0676674	Padj <0.1
Helz	953.136	0.909378	0.188478	4.29428	1.75e-05	0.0039962	Padj <0.1
Herc2	827.488	0.744774	0.240876	2.67678	0.00743327	0.0966326	Padj <0.1
Hesx1	92.771	-2.03436	0.60555	-3.19438	0.00140131	0.0376258	Padj <0.1
Hgh1	442.644	-1.18543	0.341746	-3.17613	0.00149255	0.0389535	Padj <0.1
Higd1a	1951.93	-0.8691	0.285661	-2.69235	0.00709503	0.094196	Padj <0.1
Hikeshi	847.554	-0.755619	0.186689	-3.51182	0.000445051	0.0208246	Padj <0.1
Hip1r	314.172	1.48617	0.422919	3.27763	0.00104682	0.031927	Padj <0.1
Hirip3	541.24	-0.852684	0.273205	-2.75502	0.00586887	0.0834716	Padj <0.1
Hivep2	104.505	1.8163	0.480799	3.56969	0.000357407	0.0186558	Padj <0.1
Hlf	859.391	1.83613	0.483823	3.58836	0.000332762	0.0179253	Padj <0.1
Hmg20a	1000.43	0.732748	0.17018	3.71812	0.000200711	0.0138864	Padj <0.1
Hmgb3	4634.97	-0.948775	0.281286	-3.01748	0.00254888	0.0517775	Padj <0.1
Hnrnpc	6356.91	-0.669524	0.16521	-3.44727	0.000566273	0.0235508	Padj <0.1
Hnrnpll	821.545	-1.04304	0.334482	-2.81941	0.00481127	0.074558	Padj <0.1
Hook3	558.264	0.832842	0.253671	2.88894	0.0038654	0.0656341	Padj <0.1
Hoxa10	61.8682	2.45144	0.761978	3.08596	0.00202896	0.0466347	Padj <0.1
Hoxa9	418.237	2.09249	0.511125	3.89824	9.69e-05	0.00985681	Padj <0.1
Hoxb5os	11.4678	2.89591	0.947747	2.95006	0.0031771	0.0590394	Padj <0.1
Hoxb6	5.89986	5.42774	1.44914	3.67648	0.000236476	0.0150308	Padj <0.1
Hpf1	846.068	-0.778531	0.236373	-2.8706	0.00409697	0.0676018	Padj <0.1
Hprt	1590.69	-0.990129	0.310819	-2.86382	0.00418569	0.0680175	Padj <0.1
Hsh2d	49.0946	3.20933	0.64293	4.8362	1.32e-06	0.000760471	Padj <0.1
Hsp90aa1	21032.5	-1.09151	0.339462	-2.92082	0.00349109	0.0622776	Padj <0.1
Hspa1b	159.664	-2.76311	0.949239	-2.80552	0.00502354	0.076444	Padj <0.1
Hspa8	82915.6	-1.01823	0.264499	-3.47159	0.000517387	0.0225905	Padj <0.1
Hspb9	6.21647	5.4664	1.84364	2.91077	0.00360542	0.0633928	Padj <0.1
Hspbap1	271.108	-1.02357	0.320367	-2.88286	0.0039408	0.0665212	Padj <0.1
Hspd1	9571.59	-1.08432	0.364045	-2.70384	0.00685427	0.0932402	Padj <0.1
Hspe1	3152.35	-1.10017	0.34845	-2.87034	0.00410032	0.0676018	Padj <0.1
Hsph1	1991.4	-1.42038	0.303152	-4.35552	1.33e-05	0.00340535	Padj <0.1
Htatip2	372.228	-1.27961	0.281127	-4.19601	2.72e-05	0.00489835	Padj <0.1
Huwe1	1857.83	0.542464	0.158282	2.79541	0.0051834	0.0774813	Padj <0.1
Icam4	872.352	-1.99949	0.561035	-3.38568	0.000710024	0.0261166	Padj <0.1
Idh3b	3852.16	-0.603764	0.157066	-3.20734	0.0013397	0.0363108	Padj <0.1
Ifi30	476.058	-1.83257	0.416434	-4.16049	3.18e-05	0.00524353	Padj <0.1
Ifit1	87.9348	-1.48275	0.505407	-2.73592	0.00622054	0.0867554	Padj <0.1
Ifit3	133.293	-1.73715	0.594576	-2.75348	0.00589652	0.0836992	Padj <0.1
Ift81	94.4817	1.0104	0.295296	3.08302	0.0020491	0.0468716	Padj <0.1
Igsf9	21.9754	5.85841	1.32707	4.3392	1.43e-05	0.00360392	Padj <0.1
Ikbke	218.575	2.09343	0.709537	2.80947	0.00496224	0.0759133	Padj <0.1
Ikzf2	585.125	1.64668	0.557127	2.77617	0.00550036	0.0801346	Padj <0.1
Il12rb2	44.0225	5.57956	0.795193	6.89085	5.55e-12	2.66e-08	Padj <0.1
Il18rap	141.06	2.39847	0.62291	3.68989	0.000224355	0.0146493	Padj <0.1
Il1rl1	53.2276	-2.47826	0.516225	-4.60703	4.08e-06	0.00152644	Padj <0.1
Il1rl2	111.564	1.72962	0.611083	2.66677	0.00765831	0.09843	Padj <0.1
Il21r	234.531	1.67278	0.553779	2.84009	0.00451011	0.0715096	Padj <0.1
Ildr1	8.42241	3.94504	1.27088	3.02549	0.00248234	0.0512339	Padj <0.1
Inf2	363.345	1.10852	0.219202	4.60089	4.21e-06	0.00152644	Padj <0.1
Ino80d	300.182	1.40366	0.332984	3.91508	9.04e-05	0.00954576	Padj <0.1
Inpp1	349.502	1.32897	0.350247	3.50886	0.000450029	0.0208633	Padj <0.1
Inpp5d	1015.43	1.32784	0.274821	4.46778	7.9e-06	0.00232156	Padj <0.1
Insyn2b	12.2212	4.99738	1.81619	2.69651	0.00700706	0.0938372	Padj <0.1
Ints8	432.927	-1.00176	0.302537	-2.98064	0.00287646	0.055315	Padj <0.1
Ipw	5950.48	-1.41242	0.330148	-3.97524	7.03e-05	0.00878241	Padj <0.1
Iqgap1	2077.17	0.758581	0.246436	2.67242	0.00753073	0.0972832	Padj <0.1
Irf1	769.399	1.66563	0.371111	4.21876	2.46e-05	0.0047629	Padj <0.1
Iscu	1779.9	-0.569861	0.157665	-2.98011	0.00288142	0.0553364	Padj <0.1
Itgav	102.797	1.42466	0.288021	4.59916	4.24e-06	0.00152644	Padj <0.1
Itpk1	301.084	1.47869	0.385356	3.57771	0.000346619	0.0184693	Padj <0.1
Itpkc	61.9238	1.74485	0.490647	3.3524	0.00080113	0.0275502	Padj <0.1
Itpr1	566.636	0.713333	0.209467	2.92807	0.00341071	0.0613924	Padj <0.1
Itpripl1	1274.03	-0.946298	0.265854	-3.18332	0.00145598	0.0385948	Padj <0.1
Jagn1	1240.04	-0.750509	0.240022	-2.71021	0.00672409	0.0919044	Padj <0.1
Josd1	864.671	-0.848434	0.224776	-3.32968	0.000869443	0.028515	Padj <0.1
Jun	1997.57	1.61863	0.364474	4.16664	3.09e-05	0.00522408	Padj <0.1
Junb	1200.59	1.67659	0.48439	3.25479	0.00113478	0.032799	Padj <0.1
Kansl1l	86.4005	1.3552	0.456874	2.74738	0.0060074	0.0846107	Padj <0.1
Katnip	180.75	1.25725	0.311995	3.70919	0.000207925	0.014167	Padj <0.1
Kcnd1	58.1954	2.05201	0.569186	3.42948	0.000604741	0.0242763	Padj <0.1
Kcnh2	49.6965	3.39359	1.1318	2.91004	0.00361377	0.0634229	Padj <0.1
Kcnj2	152.829	1.76462	0.616205	2.70141	0.00690462	0.09351	Padj <0.1
Kcnq1ot1	1035.19	2.26444	0.30044	7.20424	5.84e-13	4.19e-09	Padj <0.1
Kctd1	86.4579	1.84787	0.574579	3.042	0.00235014	0.0494287	Padj <0.1
Kctd14	196.433	-1.72201	0.534362	-3.03542	0.00240204	0.0499353	Padj <0.1
Kctd18	135.965	0.907673	0.303889	2.65779	0.00786549	0.0991829	Padj <0.1
Kctd3	875.354	-0.873514	0.249482	-3.10048	0.00193209	0.0453505	Padj <0.1
Kctd4	10.0821	2.93608	0.88867	3.19137	0.00141598	0.0378782	Padj <0.1
Kdm2a	1109.62	0.552058	0.147583	3.06307	0.00219078	0.04763	Padj <0.1
Kdm5b	1218.92	0.857749	0.220408	3.43794	0.000586153	0.0240574	Padj <0.1
Kdm6b	839.179	1.20608	0.339124	3.26158	0.00110794	0.032496	Padj <0.1
Khdc4	1073.03	0.799161	0.175446	3.98505	6.75e-05	0.00872582	Padj <0.1
Khk	599.533	-1.00752	0.337724	-2.68716	0.00720614	0.0950562	Padj <0.1
Khnyn	502.276	1.11671	0.375349	2.70871	0.00675445	0.0922316	Padj <0.1
Kifbp	243.402	-0.910196	0.255727	-3.16821	0.00153379	0.0394149	Padj <0.1
Klc4	386.365	1.03879	0.256759	3.6563	0.000255885	0.0155857	Padj <0.1
Klf1	3558.17	-2.00873	0.569417	-3.35209	0.000802044	0.0275502	Padj <0.1
Klf12	142.631	1.35464	0.365649	3.43126	0.000600793	0.02426	Padj <0.1
Klf8	21.9446	2.86294	0.83077	3.32576	0.000881763	0.0287876	Padj <0.1
Klhl18	188.788	1.2716	0.381612	3.07013	0.00213966	0.0475793	Padj <0.1
Klhl24	547.717	1.23788	0.417692	2.7242	0.0064457	0.0887444	Padj <0.1
Klhl28	195.586	1.15907	0.398162	2.65989	0.00781654	0.0990802	Padj <0.1
Klrg2	5.39907	4.54348	1.67202	2.65755	0.00787111	0.0991829	Padj <0.1
Kmt2c	786.802	0.952533	0.214242	3.9793	6.91e-05	0.00872582	Padj <0.1
Kmt2d	1219.33	1.44326	0.31351	4.2846	1.83e-05	0.00410903	Padj <0.1
Kmt5a	1011.75	-1.01895	0.274516	-3.34754	0.000815321	0.0275502	Padj <0.1
Ksr2	19.4346	5.01584	1.5055	3.26526	0.00109365	0.0324943	Padj <0.1
Lama5	114.799	2.33747	0.68636	3.25991	0.00111449	0.032496	Padj <0.1
Lancl3	49.7985	2.1554	0.613519	3.35018	0.000807603	0.0275502	Padj <0.1
Lclat1	186.247	1.18523	0.327032	3.31843	0.000905262	0.0291571	Padj <0.1
Lcor	176.579	1.70702	0.38313	4.19446	2.74e-05	0.00489835	Padj <0.1
Lcorl	211.829	1.1577	0.322868	3.27596	0.00105304	0.0319809	Padj <0.1
Lct	6.94292	5.61269	1.88632	2.92245	0.00347288	0.0620497	Padj <0.1
Lgals1	7977.95	-0.931072	0.210032	-3.95688	7.59e-05	0.0090309	Padj <0.1
Lhcgr	21.4133	3.62989	1.17912	2.99366	0.00275652	0.0538951	Padj <0.1
Lias	807.921	-0.910245	0.292447	-2.77057	0.00559575	0.0809001	Padj <0.1
Lilrb4b	26.6139	6.09005	1.83307	3.26778	0.00108396	0.0324943	Padj <0.1
Lmbr1l	138.058	1.76535	0.485781	3.42818	0.000607638	0.024314	Padj <0.1
Lmx1a	7.64518	3.21235	1.03561	3.00533	0.0026529	0.0528557	Padj <0.1
Lrif1	86.8507	1.12318	0.35927	2.84795	0.00440023	0.070625	Padj <0.1
Lrpap1	2236.74	-0.635963	0.182056	-2.94394	0.00324061	0.0594833	Padj <0.1
Lrr1	155.397	-1.1081	0.275974	-3.65289	0.00025931	0.0155857	Padj <0.1
Lrrc61	164.008	1.37751	0.382215	3.34239	0.000830602	0.0276575	Padj <0.1
Lrrk1	210.197	1.16234	0.321603	3.30325	0.000955712	0.0301903	Padj <0.1
Lrrn4	67.0509	3.1892	0.648481	4.76375	1.9e-06	0.000941293	Padj <0.1
Lsm1	710.542	-0.587253	0.174022	-2.79996	0.00511097	0.0770458	Padj <0.1
Lsm10	788.95	-0.804634	0.190285	-3.70305	0.000213026	0.0143195	Padj <0.1
Lsm4	2841.5	-0.806294	0.168105	-4.2015	2.65e-05	0.00488326	Padj <0.1
Lsm7	3718.64	-1.01103	0.266326	-3.42073	0.000624524	0.0246464	Padj <0.1
Lyar	1563.03	-1.13514	0.338025	-3.06231	0.00219638	0.0476602	Padj <0.1
Lyrm4	1625.83	-1.21964	0.324355	-3.45191	0.000556636	0.0234489	Padj <0.1
Lyst	297.982	1.17106	0.363165	2.94924	0.0031856	0.0590466	Padj <0.1
Macir	756.031	-1.196	0.309019	-3.5467	0.000390083	0.019234	Padj <0.1
Maml3	378.513	1.27048	0.355995	3.28791	0.00100933	0.0312922	Padj <0.1
Mansc1	155.516	1.58356	0.4552	3.25914	0.00111751	0.032496	Padj <0.1
Map3k12	227.426	1.2978	0.333158	3.59528	0.000324044	0.0179034	Padj <0.1
Map3k9	5.86016	5.3887	1.93415	2.73439	0.00624969	0.0870774	Padj <0.1
Map7	211.304	1.35368	0.415036	3.02065	0.00252233	0.0514677	Padj <0.1
Mapk8	278.217	1.10142	0.287184	3.48703	0.00048841	0.021919	Padj <0.1
Mapkbp1	149.055	1.21203	0.365868	3.03944	0.00237018	0.0497005	Padj <0.1
Marchf5	685.888	-0.847169	0.281034	-2.65864	0.0078457	0.0990802	Padj <0.1
Marco	37.8663	-9.28543	1.10172	-8.33734	7.6e-17	1.09e-12	Padj <0.1
Marveld2	107.496	2.08063	0.538039	3.68119	0.000232144	0.0149427	Padj <0.1
Mast4	228.625	1.53834	0.365336	3.93704	8.25e-05	0.00918676	Padj <0.1
Mbd5	155.769	0.991777	0.318944	2.79603	0.00517344	0.0774813	Padj <0.1
Mbnl2	1188.82	0.743876	0.173599	3.70898	0.000208092	0.014167	Padj <0.1
Mctp1	152.501	1.61942	0.556503	2.73029	0.00632778	0.0876882	Padj <0.1
Mdh2	9874.96	-0.808711	0.233216	-3.03885	0.00237479	0.0497005	Padj <0.1
Mecom	1131.02	1.82894	0.454749	3.80196	0.000143554	0.0115023	Padj <0.1
Mecp2	381.761	0.699064	0.14783	4.05237	5.07e-05	0.00694348	Padj <0.1
Mecr	856.596	-1.23017	0.340977	-3.31451	0.000918052	0.0294371	Padj <0.1
Med12l	68.0987	2.97236	0.715906	4.01221	6.02e-05	0.00792762	Padj <0.1
Med28	1763.34	-0.640449	0.18573	-2.90985	0.00361597	0.0634229	Padj <0.1
Med29	884.535	-0.805191	0.226921	-3.10765	0.00188583	0.0447767	Padj <0.1
Med8	1325.66	-0.841869	0.222723	-3.33091	0.000865627	0.0284548	Padj <0.1
Mef2c	2165.68	1.0935	0.241917	4.10679	4.01e-05	0.00626424	Padj <0.1
Mei4	17.3366	2.48921	0.669445	3.56893	0.00035844	0.0186558	Padj <0.1
Meis1	1516.78	1.28983	0.413091	2.88031	0.00397281	0.0667808	Padj <0.1
Mettl1	623.912	-0.756118	0.206875	-3.17157	0.00151618	0.039243	Padj <0.1
Mettl27	368.01	1.6431	0.445619	3.46282	0.000534547	0.0229903	Padj <0.1
Mettl3	1832.6	-0.816126	0.213254	-3.35809	0.000784821	0.0274305	Padj <0.1
Mex3a	471.958	1.61528	0.321817	4.70852	2.5e-06	0.00115623	Padj <0.1
Mfap2	241.692	1.36243	0.401718	3.14258	0.00167467	0.0422045	Padj <0.1
Mfsd4a	60.5441	2.03042	0.428477	4.5053	6.63e-06	0.00208567	Padj <0.1
Mib1	719.562	0.7067	0.181843	3.3364	0.00084871	0.0280915	Padj <0.1
Micos10	2952.06	-0.803706	0.25114	-2.80204	0.00507802	0.0768955	Padj <0.1
Micos13	1969.8	-0.640404	0.175412	-3.08077	0.00206467	0.0470777	Padj <0.1
Minpp1	1309.03	-0.966402	0.317015	-2.733	0.00627599	0.0872746	Padj <0.1
Mipep	328.198	-0.991404	0.310154	-2.87406	0.00405227	0.067218	Padj <0.1
Mmp25	33.535	2.82284	0.796585	3.41814	0.000630507	0.0246791	Padj <0.1
Mns1	1436.62	-1.48998	0.407228	-3.41328	0.000641871	0.0249124	Padj <0.1
Mob1b	252.674	0.76765	0.220881	3.02267	0.00250557	0.0513444	Padj <0.1
Morn1	31.503	2.34052	0.588851	3.8049	0.000141863	0.0115023	Padj <0.1
Mpc1	1136.83	-0.958276	0.277349	-3.09457	0.00197096	0.0459591	Padj <0.1
Mphosph10	674.984	-1.12769	0.322475	-3.18687	0.0014382	0.0382589	Padj <0.1
Mphosph6	726.463	-0.934444	0.264456	-3.15533	0.00160319	0.0408629	Padj <0.1
Mphosph9	260.492	0.850753	0.260035	2.88712	0.00388782	0.0658281	Padj <0.1
Mpv17l2	585.748	-1.26293	0.372721	-3.1201	0.00180789	0.0438967	Padj <0.1
Mrap	195.674	-2.05763	0.581567	-3.36613	0.000762295	0.027061	Padj <0.1
Mrpl14	1080.38	-0.719425	0.184793	-3.35199	0.00080232	0.0275502	Padj <0.1
Mrpl16	661.914	-0.783099	0.242	-2.82273	0.00476169	0.0739478	Padj <0.1
Mrpl18	1921.3	-0.861069	0.264456	-2.87787	0.00400375	0.0669545	Padj <0.1
Mrpl2	1872.46	-0.776629	0.207274	-3.26442	0.00109687	0.0324943	Padj <0.1
Mrpl20	1314.22	-0.782994	0.244308	-2.79563	0.00517986	0.0774813	Padj <0.1
Mrpl22	1305.52	-1.13278	0.260423	-3.96579	7.32e-05	0.00898166	Padj <0.1
Mrpl23	493.375	-0.845177	0.240023	-3.10461	0.00190533	0.0450611	Padj <0.1
Mrpl23.ps1	1871.43	-0.741224	0.238162	-2.69238	0.00709433	0.094196	Padj <0.1
Mrpl27	1677.58	-0.898411	0.276078	-2.89197	0.0038283	0.0652891	Padj <0.1
Mrpl28	2790.3	-0.750436	0.190979	-3.4058	0.000659712	0.0252042	Padj <0.1
Mrpl35	1501.05	-1.03369	0.252156	-3.70281	0.000213223	0.0143195	Padj <0.1
Mrpl36	1220.53	-0.975986	0.286254	-3.06017	0.00221211	0.0479291	Padj <0.1
Mrpl40	1174.77	-0.840392	0.239697	-3.08887	0.00200919	0.0463544	Padj <0.1
Mrpl41	762.262	-0.882524	0.292492	-2.67537	0.00746475	0.0969539	Padj <0.1
Mrpl42	3709.84	-1.1168	0.277005	-3.67068	0.000241903	0.0153081	Padj <0.1
Mrpl45	1390.28	-0.923787	0.241304	-3.4139	0.000640397	0.0249124	Padj <0.1
Mrpl46	1238.47	-0.795441	0.221837	-3.13492	0.00171899	0.0424547	Padj <0.1
Mrpl47	667.573	-1.07441	0.352564	-2.76377	0.00571383	0.0817522	Padj <0.1
Mrpl51	2453.88	-0.806419	0.243383	-2.9025	0.00370201	0.064304	Padj <0.1
Mrpl55	1336.3	-0.964462	0.289514	-2.98591	0.00282738	0.05475	Padj <0.1
Mrpl57	1086.6	-0.853336	0.19718	-3.82055	0.000133156	0.0113435	Padj <0.1
Mrps10	1112.2	-0.968862	0.27708	-3.13578	0.00171395	0.0424547	Padj <0.1
Mrps14	2052.23	-1.07295	0.242833	-4.00665	6.16e-05	0.00804243	Padj <0.1
Mrps16	1343.74	-0.630583	0.19949	-2.65969	0.00782125	0.0990802	Padj <0.1
Mrps17	1545.41	-0.74563	0.230588	-2.79993	0.00511136	0.0770458	Padj <0.1
Mrps18b	2131.03	-1.02176	0.301328	-3.059	0.0022208	0.0480449	Padj <0.1
Mrps18c	1345.07	-0.959475	0.224169	-3.83406	0.000126047	0.0110406	Padj <0.1
Mrps21	1461.98	-0.866274	0.273847	-2.79818	0.0051391	0.0772209	Padj <0.1
Mrps24	1115.1	-0.814028	0.22151	-3.22346	0.00126651	0.0349992	Padj <0.1
Mrps27	1454.61	-0.74632	0.210687	-3.06768	0.00215726	0.04763	Padj <0.1
Mrps28	1152.96	-0.801583	0.263903	-2.65849	0.00784917	0.0990802	Padj <0.1
Mrps34	1119.18	-0.947445	0.242545	-3.49397	0.000475894	0.0216433	Padj <0.1
Mrps7	1959.07	-0.810708	0.199967	-3.55413	0.000379231	0.019234	Padj <0.1
Mrtfa	341.265	1.23615	0.417367	2.72218	0.00648536	0.0889801	Padj <0.1
Mrto4	1627.41	-1.32681	0.322398	-3.80525	0.000141661	0.0115023	Padj <0.1
Msi2	825.425	1.59613	0.348115	4.29781	1.72e-05	0.0039962	Padj <0.1
Msra	444.285	0.765394	0.248238	2.68046	0.007352	0.0958361	Padj <0.1
Mtch2	3162.96	-0.667798	0.19971	-2.84311	0.00446761	0.0712288	Padj <0.1
Mtfp1	450.545	-1.48009	0.402735	-3.4268	0.000610749	0.0243706	Padj <0.1
Mthfd2	740.195	-1.26682	0.362868	-3.21554	0.00130197	0.0354907	Padj <0.1
Mtln	209.668	-1.00614	0.266529	-3.39977	0.000674435	0.0254885	Padj <0.1
Mtmr12	574.781	0.891216	0.263721	3.0002	0.00269807	0.0533853	Padj <0.1
Muc5b	7.38658	5.73578	1.73902	3.24078	0.00119202	0.0338083	Padj <0.1
Mybpc3	121.801	7.78049	1.84182	4.17006	3.05e-05	0.00520763	Padj <0.1
Mycbp2	1261.17	0.960682	0.177842	4.8396	1.3e-06	0.000760471	Padj <0.1
Mycn	696.513	1.46873	0.495488	2.76238	0.00573817	0.0819851	Padj <0.1
Mylpf	253.296	-1.87551	0.450764	-3.93888	8.19e-05	0.00918676	Padj <0.1
N4bp2	478.762	0.842309	0.18762	3.95646	7.61e-05	0.0090309	Padj <0.1
Nab2	169.003	1.28553	0.261137	4.53988	5.63e-06	0.00188037	Padj <0.1
Naip5	235.727	1.14198	0.37427	2.78402	0.00536896	0.0786952	Padj <0.1
Nanog	75.68	-1.34166	0.404841	-3.06702	0.00216203	0.04763	Padj <0.1
Nars	4425.22	-0.907284	0.269633	-2.99401	0.00275333	0.0538951	Padj <0.1
Nav2	93.1631	1.28684	0.387484	3.06295	0.00219168	0.04763	Padj <0.1
Nav3	27.6042	2.52692	0.910697	2.66491	0.00770095	0.0987038	Padj <0.1
Nbeal2	789.675	1.46105	0.416656	3.26662	0.00108841	0.0324943	Padj <0.1
Ncbp2	662.551	-0.909512	0.274135	-2.95297	0.00314732	0.0587923	Padj <0.1
Nckap5	14.3869	2.35054	0.775599	2.90169	0.00371161	0.0643151	Padj <0.1
Ncoa2	537.652	0.846097	0.210533	3.54385	0.000394327	0.019234	Padj <0.1
Ndst1	447.982	1.17688	0.288278	3.73556	0.0001873	0.0133859	Padj <0.1
Ndufa11	2190.46	-0.823531	0.227313	-3.18298	0.00145769	0.0385948	Padj <0.1
Ndufa12	3737.67	-1.03643	0.278266	-3.36522	0.00076483	0.027061	Padj <0.1
Ndufa13	2636.18	-0.727044	0.2184	-2.87109	0.00409065	0.0676018	Padj <0.1
Ndufa2	3913.53	-0.655121	0.188078	-2.95154	0.00316192	0.0589884	Padj <0.1
Ndufa9	3175.16	-0.616821	0.189149	-2.73234	0.0062886	0.0872809	Padj <0.1
Ndufab1	2458.78	-0.737777	0.227191	-2.80723	0.00499695	0.0762008	Padj <0.1
Ndufaf4	559.035	-1.00867	0.262215	-3.46537	0.000529499	0.0228741	Padj <0.1
Ndufaf6	406.572	-0.849882	0.240331	-3.12021	0.00180723	0.0438967	Padj <0.1
Ndufb10	3407.44	-1.1251	0.239595	-4.27849	1.88e-05	0.00415844	Padj <0.1
Ndufb2	2155.3	-0.725707	0.213719	-2.92771	0.00341471	0.0613924	Padj <0.1
Ndufb4	727.301	-0.886583	0.220118	-3.57347	0.000352284	0.0185903	Padj <0.1
Ndufb4c	1067.69	-0.997341	0.267642	-3.35276	0.000800094	0.0275502	Padj <0.1
Ndufb6	1702.48	-0.770597	0.224858	-2.98232	0.00286074	0.0551604	Padj <0.1
Ndufb7	2751.78	-0.981003	0.244395	-3.60483	0.00031236	0.0173917	Padj <0.1
Ndufb8	7752.1	-0.896751	0.255713	-3.1158	0.00183447	0.0440672	Padj <0.1
Ndufb9	4286.42	-0.844035	0.182894	-4.06812	4.74e-05	0.00674067	Padj <0.1
Ndufc1	1317	-0.864614	0.274675	-2.78371	0.00537417	0.0786952	Padj <0.1
Ndufs6	2546.27	-0.772393	0.214067	-3.14104	0.00168349	0.0422787	Padj <0.1
Ndufs7	3235.86	-0.856141	0.21768	-3.47363	0.00051347	0.0225905	Padj <0.1
Neat1	411.341	1.79714	0.629277	2.69698	0.0069972	0.0938372	Padj <0.1
Neb	44.3354	1.84636	0.59422	2.93891	0.00329373	0.0601966	Padj <0.1
Necap2	2121.93	-0.988908	0.330399	-2.69041	0.00713644	0.0945684	Padj <0.1
Nfat5	401.772	1.34014	0.287478	4.31388	1.6e-05	0.00391314	Padj <0.1
Nfic	532.766	1.00859	0.264703	3.43249	0.000598075	0.02426	Padj <0.1
Nfkbid	290.136	1.51798	0.458718	3.09117	0.00199367	0.0462667	Padj <0.1
Ngdn	1572.76	-0.658606	0.194235	-2.87594	0.0040283	0.0671719	Padj <0.1
Nhp2	3661.81	-1.13155	0.28531	-3.61554	0.000299717	0.0170175	Padj <0.1
Nif3l1	1199.39	-0.699165	0.215716	-2.77756	0.00547693	0.0799239	Padj <0.1
Nip7	2144.26	-0.943965	0.238178	-3.54341	0.000394981	0.019234	Padj <0.1
Nkx2.3	325.28	2.3132	0.665943	3.32341	0.00088925	0.0288354	Padj <0.1
Nlgn2	109.548	1.55454	0.341935	4.25385	2.1e-05	0.00437465	Padj <0.1
Nlrc5	26.7563	3.72712	0.886026	4.0937	4.25e-05	0.00641952	Padj <0.1
Nme1	6840.34	-1.16853	0.281697	-3.79318	0.000148729	0.0116748	Padj <0.1
Nme6	1164.44	-0.780383	0.210723	-3.2288	0.00124311	0.0348095	Padj <0.1
Nol12	873.968	-0.915747	0.221055	-3.69024	0.000224042	0.0146493	Padj <0.1
Nop16	2395.26	-0.935397	0.273507	-3.05439	0.00225519	0.0483519	Padj <0.1
Nop56	6545.83	-0.878251	0.28581	-2.72296	0.00646998	0.0888705	Padj <0.1
Nox4	35.2838	2.13689	0.578304	3.52218	0.00042802	0.0202118	Padj <0.1
Nphp3	56.0088	1.36794	0.469192	2.7024	0.00688416	0.0933815	Padj <0.1
Nqo1	148.421	-1.44899	0.473088	-2.85145	0.00435206	0.0700867	Padj <0.1
Nr0b2	34.2632	2.57159	0.931	2.65477	0.00793618	0.0995799	Padj <0.1
Nr4a1	1758.5	3.24371	0.601716	5.22458	1.75e-07	0.000227951	Padj <0.1
Nrip1	865.19	0.941613	0.274094	3.07053	0.00213679	0.0475793	Padj <0.1
Nron	10.8813	5.55876	1.41139	3.86764	0.000109892	0.0103693	Padj <0.1
Ntng2	5.44483	4.48439	1.63308	2.68474	0.00725872	0.0954867	Padj <0.1
Nubp2	2642.69	-1.10635	0.37172	-2.70727	0.00678382	0.0925447	Padj <0.1
Numbl	48.9625	1.65735	0.530752	2.93423	0.00334374	0.0608781	Padj <0.1
Nup107	1168.51	-0.677717	0.214022	-2.69933	0.00694785	0.0938067	Padj <0.1
Nup35	854.714	-1.03608	0.292185	-3.20373	0.00135659	0.0366305	Padj <0.1
Nup54	814.241	-0.797098	0.251586	-2.77081	0.00559163	0.0809001	Padj <0.1
Nutf2.ps1	2975.71	-0.632663	0.187794	-2.83642	0.0045623	0.0719401	Padj <0.1
Nwd1	49.0856	3.28041	0.822119	3.86856	0.000109482	0.0103693	Padj <0.1
Nynrin	58.1572	2.64722	0.949796	2.68186	0.00732149	0.0957862	Padj <0.1
Oas1c	43.6508	4.4098	0.889409	4.84568	1.26e-06	0.000760471	Padj <0.1
Oas3	29.2162	2.64218	0.817243	3.11068	0.00186659	0.0444668	Padj <0.1
Oat	3066.32	-0.923805	0.297261	-2.77132	0.00558303	0.0809001	Padj <0.1
Oaz1	17695.3	-0.679535	0.184768	-3.13655	0.00170948	0.0424547	Padj <0.1
Olfr1156	29.9663	1.81881	0.510022	3.37007	0.000751486	0.0268535	Padj <0.1
Olfr1173	34.4403	1.76347	0.465729	3.57176	0.000354594	0.0185903	Padj <0.1
Olfr1250	21.5979	2.03399	0.585221	3.30471	0.000950746	0.0301489	Padj <0.1
Olfr1260	18.1429	2.03979	0.702375	2.76175	0.00574922	0.0820135	Padj <0.1
Olfr1280	12.852	2.88216	0.975343	2.8525	0.00433775	0.0700132	Padj <0.1
Olfr1307	87.5769	1.38188	0.442464	2.89714	0.00376577	0.0647849	Padj <0.1
Olfr1330	11.6289	2.27608	0.682645	3.18772	0.001434	0.0382589	Padj <0.1
Olfr1336	58.4562	1.59748	0.395399	3.78727	0.000152311	0.0118268	Padj <0.1
Olfr137	8.09643	2.54619	0.872787	2.80274	0.00506712	0.076863	Padj <0.1
Olfr1459	21.7336	1.82614	0.560032	3.08221	0.00205468	0.0469245	Padj <0.1
Olfr152	6.55306	4.05061	1.3798	2.86317	0.00419427	0.0680798	Padj <0.1
Olfr351	19.4145	1.80589	0.590103	2.89084	0.0038422	0.0653947	Padj <0.1
Olfr365	32.7519	1.83185	0.549528	3.15152	0.00162424	0.041296	Padj <0.1
Olfr373	32.9329	-1.25618	0.423645	-2.72912	0.00635034	0.0877985	Padj <0.1
Olfr539	29.546	1.53916	0.527401	2.72878	0.0063569	0.0878047	Padj <0.1
Olfr655	144.393	-1.3171	0.453553	-2.68348	0.00728601	0.0955171	Padj <0.1
Olfr847	13.1304	-2.12815	0.761943	-2.66181	0.00777207	0.0990802	Padj <0.1
Olfr851	11.8705	2.11592	0.73416	2.74589	0.00603469	0.0847957	Padj <0.1
Olfr889	274.897	-1.40058	0.382523	-3.4	0.000673853	0.0254885	Padj <0.1
Olfr986	48.2918	1.60896	0.431848	3.49419	0.000475495	0.0216433	Padj <0.1
Optn	446.98	-0.955209	0.27418	-3.11916	0.00181369	0.0439177	Padj <0.1
Orai2	389.279	1.18022	0.328135	3.292	0.00099478	0.0309308	Padj <0.1
Orc2	805.784	-1.13916	0.366659	-2.83414	0.00459496	0.0722173	Padj <0.1
Orc5	870.075	-0.915037	0.263877	-3.0887	0.00201036	0.0463544	Padj <0.1
Ormdl2	1070.41	-0.838075	0.268666	-2.74718	0.00601092	0.0846107	Padj <0.1
Osgepl1	273.131	-1.14034	0.333163	-3.12261	0.00179256	0.0437926	Padj <0.1
Otos	20.3296	2.89438	1.02584	2.724	0.00644964	0.0887444	Padj <0.1
P2rx2	62.0395	3.62715	1.21681	2.89868	0.00374734	0.0647516	Padj <0.1
P2ry10b	27.2129	2.56696	0.585142	4.216	2.49e-05	0.0047629	Padj <0.1
P2ry14	34.1199	1.82384	0.644443	2.67492	0.00747464	0.0969948	Padj <0.1
Padi4	65.8648	2.74313	0.973891	2.71399	0.00664776	0.0910344	Padj <0.1
Pafah2	399.083	1.03849	0.307733	3.04969	0.00229077	0.0486598	Padj <0.1
Parp3	109.405	1.27231	0.414528	2.82805	0.00468329	0.0730461	Padj <0.1
Paxx	180.683	0.910591	0.238	3.40585	0.000659582	0.0252042	Padj <0.1
Pbdc1	1507.18	-1.12238	0.31751	-3.21998	0.001282	0.0351449	Padj <0.1
Pbld1	259.982	-1.10494	0.238759	-4.209	2.57e-05	0.00478538	Padj <0.1
Pbld2	15.0162	5.34747	1.70789	3.07248	0.00212287	0.0475793	Padj <0.1
Pbx1	746.621	1.27039	0.302707	3.86642	0.000110443	0.0103693	Padj <0.1
Pcdhga11	27.5201	4.97078	1.24704	3.90588	9.39e-05	0.00984392	Padj <0.1
Pcdhga8	12.809	6.52354	1.68347	3.81566	0.000135822	0.0113435	Padj <0.1
Pcdhgb4	14.6492	3.37233	0.835311	3.9175	8.95e-05	0.00952036	Padj <0.1
Pcdhgc5	19.7016	3.87664	1.22969	3.0712	0.00213199	0.0475793	Padj <0.1
Pcmt1	2091.14	-0.702466	0.2	-3.01232	0.00259256	0.052165	Padj <0.1
Pcmtd1	386.901	0.719962	0.19104	3.2452	0.00117369	0.0335244	Padj <0.1
Pde1b	69.2061	1.79844	0.607932	2.79379	0.00520936	0.0776145	Padj <0.1
Pde4d	348.218	1.10848	0.376396	2.67929	0.0073778	0.0960853	Padj <0.1
Pdlim2	193.152	1.62078	0.405183	3.75332	0.000174505	0.0129369	Padj <0.1
Pds5b	580.997	0.658743	0.137282	4.07004	4.7e-05	0.00674067	Padj <0.1
Pelo	282.596	-0.945064	0.286972	-2.94476	0.0032321	0.0594833	Padj <0.1
Per1	306.627	1.44867	0.43016	3.13527	0.00171696	0.0424547	Padj <0.1
Pfdn6	1455.05	-0.935335	0.269173	-3.10334	0.00191349	0.0450611	Padj <0.1
Pgam2	11.903	3.2807	0.811382	3.92011	8.85e-05	0.00948842	Padj <0.1
Pgbd1	40.9164	-2.35824	0.771306	-2.92782	0.00341352	0.0613924	Padj <0.1
Pglyrp2	491.744	2.28723	0.555214	3.93942	8.17e-05	0.00918676	Padj <0.1
Pgp	976.439	-1.17754	0.314211	-3.42936	0.000605006	0.0242763	Padj <0.1
Phb	4605.79	-0.969053	0.275443	-3.15511	0.00160436	0.0408629	Padj <0.1
Phc3	388.675	0.725909	0.194223	3.22264	0.00127016	0.0349992	Padj <0.1
Phf10	1063.95	-1.17954	0.374915	-2.87942	0.00398408	0.0668063	Padj <0.1
Phf5a	2664.95	-0.960973	0.266993	-3.2247	0.00126106	0.0349712	Padj <0.1
Phospho2	286.802	-0.841696	0.2581	-2.87368	0.00405717	0.0672218	Padj <0.1
Phtf2	301	1.09356	0.362842	2.73828	0.00617621	0.0862208	Padj <0.1
Phxr4	54.376	3.12175	0.720795	4.19225	2.76e-05	0.00489835	Padj <0.1
Pign	299.12	1.0605	0.274329	3.50126	0.000463063	0.0213202	Padj <0.1
Pigyl	336.669	-0.613742	0.180917	-2.83966	0.00451618	0.0715269	Padj <0.1
Pih1d2	54.24	-1.45602	0.485933	-2.79054	0.00526195	0.0780062	Padj <0.1
Pik3c2a	224.424	1.43761	0.455815	2.93456	0.00334021	0.0608781	Padj <0.1
Pik3c2g	8.9611	5.27204	1.83835	2.81341	0.00490188	0.0753914	Padj <0.1
Pik3cg	733.595	1.53501	0.375959	3.81693	0.000135123	0.0113435	Padj <0.1
Pik3ip1	466.491	1.4471	0.437838	3.07671	0.00209299	0.0474272	Padj <0.1
Pikfyve	296.554	0.808273	0.263288	2.69011	0.00714283	0.0945684	Padj <0.1
Pim2	289.906	2.01826	0.560522	3.42227	0.000621009	0.0246289	Padj <0.1
Pkd2	311.463	1.50903	0.345485	4.07841	4.53e-05	0.00664685	Padj <0.1
Pkn1	1114.27	0.856557	0.278927	2.71239	0.00668006	0.0913896	Padj <0.1
Pla2g12a	638.419	-1.57562	0.426654	-3.45859	0.000543001	0.0232155	Padj <0.1
Plaur	745.758	1.53008	0.515463	2.77437	0.00553091	0.0804164	Padj <0.1
Plcb2	732.121	1.7144	0.52494	3.07541	0.00210217	0.0475553	Padj <0.1
Plcg2	1326.42	1.58751	0.484597	3.06959	0.00214356	0.0475924	Padj <0.1
Plec	1119.21	1.52166	0.352431	4.03386	5.49e-05	0.00729796	Padj <0.1
Plekha3	2096.82	-1.41714	0.32507	-4.05186	5.08e-05	0.00694348	Padj <0.1
Plekhg6	15.167	3.5895	1.20329	2.89997	0.00373193	0.0645893	Padj <0.1
Plin2	3039.4	-0.722794	0.220056	-2.83016	0.0046525	0.0727239	Padj <0.1
Plppr3	317.985	2.09885	0.664968	3.00592	0.00264774	0.0528557	Padj <0.1
Pno1	891.239	-1.02136	0.289485	-3.18274	0.00145889	0.0385948	Padj <0.1
Pola2	10893.4	-1.35714	0.268106	-4.68897	2.75e-06	0.0012326	Padj <0.1
Polr1c	1250.91	-0.875181	0.267638	-2.89638	0.003775	0.0648659	Padj <0.1
Polr2g	1767.31	-0.898362	0.258331	-3.09046	0.00199849	0.0463037	Padj <0.1
Polr2l	1865.66	-0.732322	0.209906	-3.01241	0.00259184	0.052165	Padj <0.1
Polr3k	1837.41	-0.955312	0.26105	-3.27642	0.0010513	0.0319809	Padj <0.1
Pop5	967.246	-1.04221	0.255818	-3.68311	0.000230407	0.014909	Padj <0.1
Pou2f1	293.912	1.05755	0.300951	3.18175	0.00146386	0.038655	Padj <0.1
Pou2f2	163.742	1.85	0.62241	2.81165	0.00492881	0.0755629	Padj <0.1
Ppargc1a	34.8408	1.74486	0.620208	2.65211	0.00799903	0.0998315	Padj <0.1
Ppid	2775.37	-1.15333	0.310639	-3.39085	0.000696761	0.0258351	Padj <0.1
Ppip5k1	303.133	-1.16792	0.291116	-3.66837	0.000244104	0.0153261	Padj <0.1
Ppp1r12a	1024.98	0.639643	0.166292	3.24515	0.00117388	0.0335244	Padj <0.1
Ppp1r35	124.042	-1.08804	0.287064	-3.44188	0.000577679	0.0239146	Padj <0.1
Ppp1r9a	574.759	1.35572	0.46117	2.7229	0.00647118	0.0888705	Padj <0.1
Ppp6r3	1686.73	0.582474	0.148015	3.25964	0.00111554	0.032496	Padj <0.1
Pradc1	437.987	-0.855578	0.232341	-3.25202	0.00114589	0.0329214	Padj <0.1
Pramel4	145.124	-1.43623	0.446884	-2.99009	0.00278892	0.0541488	Padj <0.1
Pramel5	24.2336	-2.49861	0.721178	-3.32596	0.000881143	0.0287876	Padj <0.1
Prdm16	382.624	2.59122	0.571578	4.35849	1.31e-05	0.00340535	Padj <0.1
Prdx3	2661.62	-1.09638	0.351068	-2.83813	0.00453793	0.0717133	Padj <0.1
Prelid2	385.47	-1.17459	0.388033	-2.76932	0.00561738	0.0809616	Padj <0.1
Prkab2	191.781	1.2999	0.324136	3.70184	0.000214037	0.0143195	Padj <0.1
Prkag1	2277.2	-0.876174	0.237173	-3.2726	0.00106563	0.0321592	Padj <0.1
Prkg1	24.6678	3.2924	0.9751	3.27391	0.00106069	0.0321158	Padj <0.1
Prmt9	284.942	-1.21064	0.303888	-3.65477	0.000257417	0.0155857	Padj <0.1
Procr	519.848	1.4898	0.460085	3.02075	0.00252153	0.0514677	Padj <0.1
Prpf38a	1085.39	-0.809638	0.26312	-2.69702	0.00699636	0.0938372	Padj <0.1
Prr12	250.364	0.897559	0.23839	3.3456	0.000821049	0.0275502	Padj <0.1
Prr14l	1125.6	0.616409	0.194613	2.65351	0.00796594	0.0997591	Padj <0.1
Prrc2b	1819.32	0.640487	0.156675	3.44974	0.000561135	0.0235006	Padj <0.1
Prrc2c	2783.87	0.798105	0.215862	3.23404	0.00122053	0.0345136	Padj <0.1
Prss41	9.45955	6.07474	2.0545	2.90813	0.00363595	0.063618	Padj <0.1
Prss50	297.466	-1.70002	0.570819	-2.80302	0.00506259	0.076863	Padj <0.1
Psma2	5284.47	-0.832048	0.226594	-3.23066	0.00123506	0.0346516	Padj <0.1
Psma5	4708.93	-0.715228	0.228505	-2.6924	0.00709389	0.094196	Padj <0.1
Psma7	7573.39	-0.656243	0.18832	-2.95371	0.00313979	0.0587279	Padj <0.1
Psmb2	5887.88	-0.788169	0.212848	-3.23314	0.00122437	0.0345541	Padj <0.1
Psmb3	5202.39	-0.859122	0.21954	-3.45779	0.000544632	0.0232155	Padj <0.1
Psmb6	8599.16	-0.98034	0.285976	-3.07837	0.00208134	0.0473077	Padj <0.1
Psmb7	3271.09	-0.634935	0.141966	-3.76806	0.000164522	0.0125518	Padj <0.1
Psmc2	3591.38	-1.02078	0.238754	-3.85661	0.000114971	0.0104529	Padj <0.1
Psmc3ip	654.114	-1.10211	0.291428	-3.43862	0.000584677	0.0240574	Padj <0.1
Psmc4	4854.55	-0.730851	0.201111	-3.13684	0.0017078	0.0424547	Padj <0.1
Psmc5	4120.22	-0.623907	0.187567	-2.79318	0.00521933	0.0776145	Padj <0.1
Psmc6	1865.27	-0.690193	0.206068	-2.86407	0.00418232	0.0680175	Padj <0.1
Psmd10	1169.13	-1.12208	0.223654	-4.56991	4.88e-06	0.00166888	Padj <0.1
Psmd11	3632.48	-0.580612	0.17842	-2.69371	0.00706616	0.094196	Padj <0.1
Psmd12	2714.62	-0.961744	0.243944	-3.53255	0.000411566	0.0196417	Padj <0.1
Psmd14	2664.16	-0.736556	0.223359	-2.84992	0.00437297	0.0702659	Padj <0.1
Psmd5	2153.08	-1.00384	0.278218	-3.24866	0.00115949	0.0332455	Padj <0.1
Psmd7	4221.6	-0.959671	0.229061	-3.75303	0.000174713	0.0129369	Padj <0.1
Psme2	3193.66	-0.723444	0.214592	-2.90525	0.00366962	0.0639735	Padj <0.1
Psme3	1792.18	-1.06145	0.29275	-3.2842	0.00102271	0.0314441	Padj <0.1
Psmf1	1136.88	-0.927734	0.196485	-4.2127	2.52e-05	0.0047694	Padj <0.1
Psmg2	916.523	-0.884704	0.258896	-3.03096	0.00243777	0.0505319	Padj <0.1
Psmg3	685.201	-0.824506	0.240341	-3.0145	0.00257405	0.0520792	Padj <0.1
Ptcd2	765.735	-0.871808	0.276781	-2.78851	0.00529512	0.0782556	Padj <0.1
Ptdss2	1202.02	-1.14806	0.369267	-2.83821	0.00453677	0.0717133	Padj <0.1
Ptpmt1	402.173	-0.59104	0.177586	-2.76508	0.00569084	0.0815054	Padj <0.1
Ptprc	870.691	1.77149	0.62826	2.66051	0.00780216	0.0990802	Padj <0.1
Ptrh2	918.684	-0.821481	0.250917	-2.87538	0.0040354	0.0671719	Padj <0.1
Pttg1	597.758	-0.960629	0.287109	-2.99756	0.00272147	0.0535533	Padj <0.1
Pum1	1821.4	0.853183	0.195606	3.85051	0.000117874	0.0104989	Padj <0.1
Qser1	388.13	0.794571	0.180523	3.84754	0.000119311	0.0105147	Padj <0.1
Qsox1	2048.25	-0.868502	0.281485	-2.73017	0.00633016	0.0876882	Padj <0.1
Qtrt1	1001.27	-0.820689	0.200759	-3.58982	0.000330912	0.0179253	Padj <0.1
Rab24	593.232	-1.1898	0.351105	-3.10393	0.0019097	0.0450611	Padj <0.1
Rab2b	280.55	1.14489	0.219223	4.76633	1.88e-06	0.000941293	Padj <0.1
Rab5if	2313.82	-1.54949	0.341869	-4.2399	2.24e-05	0.00446183	Padj <0.1
Rabgap1	463.444	0.971661	0.249545	3.49301	0.000477614	0.0216433	Padj <0.1
Rabggtb	1754.81	-0.859291	0.266736	-2.84661	0.00441881	0.070765	Padj <0.1
Ramp3	39.9861	3.35841	0.992287	3.28373	0.00102442	0.0314441	Padj <0.1
Ran	14266.9	-0.892786	0.242177	-3.27358	0.00106196	0.0321158	Padj <0.1
Ranbp1	6021.36	-0.994249	0.2592	-3.45003	0.000560527	0.0235006	Padj <0.1
Rangrf	1066.9	-1.08919	0.344022	-2.87538	0.00403546	0.0671719	Padj <0.1
Rasal3	190.178	1.76315	0.616266	2.69875	0.0069601	0.0938372	Padj <0.1
Rasl12	32.998	2.54665	0.670255	3.65033	0.000261904	0.015611	Padj <0.1
Rassf2	441.505	1.51737	0.488441	2.90182	0.00371004	0.0643151	Padj <0.1
Rbks	133.785	-1.27984	0.338432	-3.4862	0.000489935	0.021919	Padj <0.1
Rbm4b	738.665	0.674597	0.215498	2.66637	0.00766747	0.09843	Padj <0.1
Rbm8a	2258.39	-0.65839	0.186368	-2.99617	0.00273394	0.0536516	Padj <0.1
Rc3h2	450.675	0.957906	0.263767	3.25251	0.00114389	0.0329214	Padj <0.1
Reg2	12.7996	2.54236	0.791894	3.08421	0.00204096	0.0468345	Padj <0.1
Relch	319.003	1.19414	0.256251	4.26978	1.96e-05	0.00424788	Padj <0.1
Rep15	132.757	-1.24555	0.375668	-3.04936	0.00229326	0.0486598	Padj <0.1
Rere	701.76	0.961321	0.244236	3.52659	0.000420948	0.0200229	Padj <0.1
Rest	949.081	0.8528	0.208949	3.60279	0.000314822	0.0174611	Padj <0.1
Rexo2	1395.62	-0.799136	0.239612	-2.91779	0.00352523	0.0625027	Padj <0.1
Rfc4	1215.88	-1.23906	0.278439	-4.09087	4.3e-05	0.0064308	Padj <0.1
Rfesd	615.41	-1.64674	0.427201	-3.62064	0.000293879	0.0167523	Padj <0.1
Rfx3	123.664	1.7873	0.451667	3.73571	0.000187185	0.0133859	Padj <0.1
Rgcc	1549.42	-1.87587	0.480275	-3.69761	0.000217638	0.0144739	Padj <0.1
Rhag	1332.71	-1.83744	0.582094	-2.98482	0.00283746	0.0548588	Padj <0.1
Rhobtb3	213.023	1.11046	0.280281	3.60515	0.000311973	0.0173917	Padj <0.1
Ric8a	1065.84	0.593305	0.155284	3.1768	0.00148907	0.0389535	Padj <0.1
Rictor	324.253	1.37126	0.251576	5.05321	4.34e-07	0.000443126	Padj <0.1
Riox1	352.251	-0.877453	0.279179	-2.78478	0.00535635	0.0786952	Padj <0.1
Rmi2	254.556	-0.916134	0.243917	-3.34595	0.000820017	0.0275502	Padj <0.1
Rnd3	88.8952	1.51593	0.523859	2.70288	0.0068742	0.0933345	Padj <0.1
Rnf113a1	143.447	-1.36815	0.356401	-3.55822	0.000373377	0.0190874	Padj <0.1
Rnf169	356.839	0.838488	0.215236	3.43106	0.000601222	0.02426	Padj <0.1
Rnf180	15.6382	3.79722	0.900959	4.10365	4.07e-05	0.00628161	Padj <0.1
Rnf207	76.6009	-1.75863	0.49035	-3.38254	0.00071818	0.0261167	Padj <0.1
Rnf223	5.60204	5.34337	1.786	2.93582	0.00332669	0.0607216	Padj <0.1
Rnf24	90.5396	1.41387	0.431325	3.04613	0.00231809	0.0489748	Padj <0.1
Romo1	2031.45	-0.60913	0.191921	-2.65281	0.00798259	0.0997997	Padj <0.1
Ropn1l	30.3839	2.32489	0.70936	3.13647	0.00170993	0.0424547	Padj <0.1
Rpe	519.148	-0.739357	0.187726	-3.4058	0.000659712	0.0252042	Padj <0.1
Rpf1	907.13	-0.810929	0.239762	-2.96514	0.00302548	0.0571422	Padj <0.1
Rpf2	1016.55	-1.33859	0.303229	-4.08467	4.41e-05	0.00653686	Padj <0.1
Rpia	139.191	-1.24733	0.398916	-2.87612	0.00402597	0.0671719	Padj <0.1
Rpl23a.ps2	8.54344	3.13126	1.05742	2.86667	0.00414818	0.0679459	Padj <0.1
Rpl27	1594.48	-0.798391	0.245394	-2.846	0.0044272	0.0708204	Padj <0.1
Rpl36al	3850.07	-0.858816	0.256602	-2.95718	0.00310468	0.0582052	Padj <0.1
Rpp30	564.985	-1.12246	0.308003	-3.31963	0.000901358	0.0291571	Padj <0.1
Rpph1	161.202	-2.20816	0.442485	-4.76437	1.89e-06	0.000941293	Padj <0.1
Rps19bp1	623.925	-0.956498	0.253601	-3.37735	0.000731878	0.0263494	Padj <0.1
Rps23rg1	136.562	-1.13078	0.368139	-2.79998	0.00511056	0.0770458	Padj <0.1
Rps27l	3642.82	-0.927668	0.236815	-3.495	0.000474057	0.0216433	Padj <0.1
Rreb1	573.868	0.754447	0.188466	3.47249	0.000515659	0.0225905	Padj <0.1
Rrp15	1279.74	-0.966436	0.276487	-3.13373	0.00172597	0.0424547	Padj <0.1
Rsbn1	218.995	0.791794	0.212724	3.25207	0.00114568	0.0329214	Padj <0.1
Rubcnl	35.966	2.22203	0.709152	2.99235	0.00276838	0.0540302	Padj <0.1
Runx2	108.079	2.55167	0.840279	2.91768	0.00352646	0.0625027	Padj <0.1
Ruvbl2	4347.12	-0.885112	0.27902	-2.81382	0.00489569	0.0753914	Padj <0.1
Ryr2	25.8825	2.112	0.656073	3.06674	0.00216409	0.04763	Padj <0.1
S1pr4	450.054	1.24999	0.414301	2.77574	0.00550759	0.0801586	Padj <0.1
Sag	244.282	-1.26167	0.365848	-3.17529	0.00149686	0.0389535	Padj <0.1
Samd15	1786.65	-1.88008	0.417175	-4.26699	1.98e-05	0.00424788	Padj <0.1
Samd4b	350.265	0.830905	0.238464	3.06505	0.00217636	0.04763	Padj <0.1
Sap18b	1378.92	-0.852999	0.186031	-4.04772	5.17e-05	0.00694348	Padj <0.1
Sap30	271.391	-1.40018	0.365111	-3.56105	0.000369377	0.0190602	Padj <0.1
Sar1b	971.216	-0.864794	0.258515	-2.95841	0.00309232	0.0580693	Padj <0.1
Sarnp	2585.68	-0.840538	0.218124	-3.39503	0.0006862	0.0256699	Padj <0.1
Sbno2	911.099	1.4099	0.251897	5.20013	1.99e-07	0.000238395	Padj <0.1
Scaf8	663.443	0.59951	0.177526	2.81373	0.00489696	0.0753914	Padj <0.1
Scai	111.275	1.92604	0.574267	3.17978	0.00147387	0.0387331	Padj <0.1
Scamp3	1140.11	-0.661979	0.150426	-3.73592	0.000187029	0.0133859	Padj <0.1
Sdhb	5427.17	-0.905833	0.22132	-3.64103	0.000271546	0.0159215	Padj <0.1
Selenoo	407.631	-0.946381	0.225346	-3.75592	0.000172705	0.0129214	Padj <0.1
Selenos	1092.57	-0.818286	0.214556	-3.34778	0.000814623	0.0275502	Padj <0.1
Selp	252.451	3.13078	0.601207	5.04116	4.63e-07	0.000443126	Padj <0.1
Sesn3	167.408	1.40181	0.342096	3.80539	0.000141583	0.0115023	Padj <0.1
Sestd1	194.375	1.12074	0.346694	2.94421	0.00323784	0.0594833	Padj <0.1
Set	11491.1	-0.895446	0.286932	-2.77224	0.00556712	0.0807795	Padj <0.1
Setbp1	82.2342	3.01433	0.85521	3.40773	0.000655051	0.0252042	Padj <0.1
Setd6	295.137	-1.44274	0.360849	-3.72107	0.000198381	0.0138337	Padj <0.1
Setx	595.29	1.04794	0.219762	4.31346	1.61e-05	0.00391314	Padj <0.1
Sfi1	413.29	1.56158	0.487781	2.99638	0.00273209	0.0536516	Padj <0.1
Sft2d3	109.881	1.25817	0.325297	3.56036	0.000370348	0.0190602	Padj <0.1
Sgsm1	164.992	2.38676	0.588086	3.88848	0.000100875	0.00996464	Padj <0.1
Sh2d4a	358.488	-2.08101	0.488683	-4.05378	5.04e-05	0.00694348	Padj <0.1
Shank3	114.073	1.87816	0.468674	3.79403	0.000148221	0.0116748	Padj <0.1
Sik1	402.411	2.29964	0.558405	3.93915	8.18e-05	0.00918676	Padj <0.1
Six5	108.077	1.63033	0.348485	4.39139	1.13e-05	0.00299616	Padj <0.1
Ski	640.371	0.664121	0.184545	3.05682	0.002237	0.0481055	Padj <0.1
Skida1	32.269	1.86756	0.596021	2.96561	0.00302087	0.0571422	Padj <0.1
Skint3	6.96015	4.02343	1.47477	2.66036	0.00780573	0.0990802	Padj <0.1
Slain1	36.7945	2.2487	0.771826	2.78392	0.00537061	0.0786952	Padj <0.1
Slbp	3521.3	-0.764789	0.187336	-3.54864	0.00038723	0.019234	Padj <0.1
Slc11a2	815.827	-1.25942	0.372093	-3.11593	0.00183364	0.0440672	Padj <0.1
Slc12a6	565.907	0.898441	0.278313	2.86886	0.00411949	0.0676674	Padj <0.1
Slc12a9	188.291	1.40271	0.453922	2.86991	0.00410591	0.0676018	Padj <0.1
Slc18a2	436.043	1.44629	0.465831	2.89008	0.00385147	0.065475	Padj <0.1
Slc22a12	5.9628	5.38379	1.6805	3.14418	0.00166555	0.0420938	Padj <0.1
Slc25a27	69.0274	1.81341	0.570243	3.0047	0.00265846	0.0528931	Padj <0.1
Slc25a33	108.744	-1.77859	0.455195	-3.68763	0.000226354	0.014713	Padj <0.1
Slc25a38	957.351	-1.4033	0.400316	-3.25568	0.00113122	0.032762	Padj <0.1
Slc25a41	11.3956	6.35912	1.61492	3.8758	0.000106275	0.0103151	Padj <0.1
Slc25a45	951.936	1.31609	0.377408	3.22221	0.00127206	0.0349992	Padj <0.1
Slc28a2	122.966	2.25572	0.664829	3.24252	0.00118479	0.0337688	Padj <0.1
Slc2a9	49.9801	2.52173	0.681094	3.55565	0.000377051	0.0192069	Padj <0.1
Slc39a6	216.006	1.1712	0.252378	4.24443	2.19e-05	0.00446183	Padj <0.1
Slc40a1	777.581	-1.18914	0.366785	-2.96941	0.00298371	0.0566944	Padj <0.1
Slc51a	10.6783	-6.96825	2.20676	-3.11237	0.00185591	0.0443091	Padj <0.1
Slc5a3	358.602	1.55855	0.429582	3.39528	0.000685578	0.0256699	Padj <0.1
Slc9b2	52.1801	1.83332	0.643734	2.6926	0.00708978	0.094196	Padj <0.1
Slfn5	494.7	-0.931123	0.274788	-3.02459	0.00248968	0.0513013	Padj <0.1
Slirp	1162.06	-0.860266	0.269168	-2.82451	0.00473537	0.0736186	Padj <0.1
Slit2	143.552	1.90717	0.479972	3.76515	0.000166448	0.0125843	Padj <0.1
Smad3	616.59	0.865026	0.243512	3.14163	0.00168009	0.0422672	Padj <0.1
Smad5	647.806	0.644166	0.185725	2.92995	0.00339012	0.0613339	Padj <0.1
Smarcad1	377.998	0.802376	0.26372	2.66334	0.00773684	0.0989668	Padj <0.1
Smg1	630.239	0.705272	0.182097	3.32389	0.00088771	0.0288354	Padj <0.1
Smg6	467.319	1.1823	0.279632	3.87046	0.000108632	0.0103693	Padj <0.1
Smim1	1727.62	-1.70521	0.451877	-3.55232	0.000381844	0.019234	Padj <0.1
Smim24	158.499	1.19904	0.367332	2.99195	0.00277203	0.0540302	Padj <0.1
Smim5	295.424	-1.96053	0.440939	-4.21947	2.45e-05	0.0047629	Padj <0.1
Snf8	4416.39	-1.24176	0.289926	-3.93811	8.21e-05	0.00918676	Padj <0.1
Snrnp25	1385.24	-0.834134	0.262436	-2.79738	0.00515182	0.0773311	Padj <0.1
Snrnp27	816.639	-0.896675	0.268271	-2.96967	0.00298119	0.0566944	Padj <0.1
Snrpa1	1970.53	-0.900643	0.228185	-3.50874	0.000450235	0.0208633	Padj <0.1
Snrpd2	2950.69	-0.9141	0.266595	-3.05369	0.00226042	0.0483919	Padj <0.1
Snx1	1974.38	-0.652783	0.167565	-3.29891	0.000970597	0.030509	Padj <0.1
Snx10	431.793	1.36931	0.399702	3.17565	0.001495	0.0389535	Padj <0.1
Snx29	118.584	1.94856	0.30627	6.0357	1.58e-09	4.55e-06	Padj <0.1
Snx31	8.73321	5.97472	1.60885	3.65149	0.000260722	0.0156053	Padj <0.1
Socs3	337.783	2.47685	0.609274	3.90112	9.57e-05	0.00985681	Padj <0.1
Sorcs2	89.9205	2.20468	0.790834	2.66134	0.00778296	0.0990802	Padj <0.1
Spag6l	7.16988	5.69432	1.82101	3.0721	0.00212561	0.0475793	Padj <0.1
Spc24	1971.31	-0.776556	0.246151	-2.74854	0.0059861	0.0844698	Padj <0.1
Spcs1	1639.27	-0.757271	0.22159	-2.96616	0.00301542	0.0571422	Padj <0.1
Spcs2	4097.59	-0.772857	0.223051	-3.01661	0.00255622	0.0517914	Padj <0.1
Spdl1	540.122	-0.952724	0.305271	-2.79334	0.00521671	0.0776145	Padj <0.1
Spire1	724.598	-1.12142	0.374225	-2.72943	0.00634448	0.0877985	Padj <0.1
Spry1	169.935	1.93324	0.517496	3.54252	0.000396329	0.019234	Padj <0.1
Sra1	1578.51	-0.818694	0.227661	-3.15686	0.00159477	0.0408358	Padj <0.1
Srgap3	159.92	1.86898	0.587813	3.00943	0.00261738	0.0524389	Padj <0.1
Sros1	48.876	1.67547	0.524593	3.00322	0.00267141	0.0530039	Padj <0.1
Srsf2	4459.4	-0.769131	0.23462	-2.85197	0.00434488	0.0700496	Padj <0.1
Srsf7	5662.71	-0.566033	0.174248	-2.67455	0.00748302	0.0970159	Padj <0.1
Ssna1	2891.43	-0.88297	0.23079	-3.39257	0.000692396	0.0257675	Padj <0.1
Sspo	12.0243	4.09918	1.19272	3.35298	0.000799469	0.0275502	Padj <0.1
St3gal5	1809.94	-1.12096	0.370968	-2.75214	0.00592065	0.0839587	Padj <0.1
St8sia4	288.729	1.5446	0.543167	2.65959	0.00782366	0.0990802	Padj <0.1
Stag3	29.4636	2.62739	0.907226	2.78584	0.00533887	0.0786594	Padj <0.1
Stap1	261.387	1.90648	0.505671	3.57244	0.000353671	0.0185903	Padj <0.1
Stat3	2262.12	0.718285	0.189581	3.26132	0.00110893	0.032496	Padj <0.1
Steap4	15.4005	4.84338	1.56869	3.02379	0.00249632	0.0513013	Padj <0.1
Stk16	1489.71	-0.638753	0.196248	-2.74526	0.00604629	0.0847957	Padj <0.1
Stk17b	742.116	1.3522	0.456869	2.74082	0.00612854	0.0856386	Padj <0.1
Stk26	151.107	1.98468	0.583306	3.23103	0.00123345	0.0346516	Padj <0.1
Stt3b	1478.54	-0.904661	0.261839	-3.07312	0.00211835	0.0475793	Padj <0.1
Stxbp4	305.611	1.0443	0.262813	3.59303	0.000326851	0.0179207	Padj <0.1
Sucla2	1639.76	-0.798126	0.249398	-2.79925	0.00512215	0.0770468	Padj <0.1
Suco	318.936	1.34456	0.343725	3.6208	0.00029369	0.0167523	Padj <0.1
Sun2	267.238	1.41801	0.455322	2.89467	0.00379557	0.0649862	Padj <0.1
Supt4a	2118.05	-0.816053	0.230635	-3.10469	0.00190476	0.0450611	Padj <0.1
Surf1	588.721	-0.878224	0.26287	-2.96049	0.00307152	0.0579033	Padj <0.1
Susd1	615.075	0.681194	0.194377	2.99004	0.00278943	0.0541488	Padj <0.1
Svbp	1165.73	-0.944215	0.261963	-3.22265	0.00127009	0.0349992	Padj <0.1
Svep1	24.9001	2.79687	0.84219	3.20221	0.00136377	0.0367552	Padj <0.1
Svil	529.844	0.915352	0.230471	3.53776	0.000403534	0.0195177	Padj <0.1
Syce2	1190.58	-1.04954	0.267875	-3.54471	0.000393047	0.019234	Padj <0.1
Syn3	22.6874	1.81215	0.645039	2.65433	0.00794657	0.0996095	Padj <0.1
Synb	366.303	-1.40213	0.364131	-3.57599	0.00034891	0.0184948	Padj <0.1
Syne1	300.231	1.08923	0.323588	3.05707	0.00223511	0.0481055	Padj <0.1
Syne2	331.231	1.57997	0.415777	3.55953	0.000371517	0.0190602	Padj <0.1
Taf12	1021.32	-1.01604	0.262881	-3.48461	0.000492852	0.021919	Padj <0.1
Taf9.1	3232.62	-0.786994	0.237052	-2.89807	0.00375462	0.0647516	Padj <0.1
Tamm41	987.815	-0.93409	0.252518	-3.30309	0.000956253	0.0301903	Padj <0.1
Tango2	1679.74	-1.42541	0.380877	-3.47989	0.000501623	0.0221717	Padj <0.1
Taok1	1007.33	0.835179	0.26381	2.78678	0.00532348	0.0785875	Padj <0.1
Tarsl2	307.444	-1.5589	0.412843	-3.53379	0.000409642	0.0196417	Padj <0.1
Tasor	208.442	0.929625	0.247326	3.35437	0.00079545	0.0275502	Padj <0.1
Tcea2	226.126	1.33607	0.312121	3.96022	7.49e-05	0.0090309	Padj <0.1
Tceal5	28.39	2.65905	0.965018	2.65181	0.00800604	0.0998323	Padj <0.1
Tcp1	6614.17	-0.847404	0.229492	-3.25677	0.00112686	0.0327018	Padj <0.1
Tdrd1	10.2538	3.56238	1.14913	3.01303	0.00258651	0.052165	Padj <0.1
Teddm1b	93.7312	-1.24324	0.408384	-2.79943	0.00511924	0.0770468	Padj <0.1
Tenm4	77.8494	1.88049	0.518563	3.43351	0.000595816	0.02426	Padj <0.1
Tert	60.4733	3.82307	0.993804	3.74628	0.000179478	0.0132215	Padj <0.1
Tesk2	67.4689	2.06327	0.469271	4.18366	2.87e-05	0.00499413	Padj <0.1
Tet1	295.065	2.09859	0.58083	3.44092	0.000579747	0.0239312	Padj <0.1
Tfg	1563.89	-0.66603	0.192974	-2.93319	0.00335499	0.060997	Padj <0.1
Tha1	79.4717	1.55226	0.539977	2.68948	0.00715638	0.0946605	Padj <0.1
Thg1l	550.32	-0.881978	0.260728	-2.99921	0.00270683	0.0534555	Padj <0.1
Thsd7b	15.4086	2.70656	0.763799	3.41262	0.000643405	0.0249124	Padj <0.1
Timm10	1165.14	-0.945255	0.300093	-2.81664	0.00485282	0.0751193	Padj <0.1
Timm13	2659.43	-0.802076	0.241033	-2.91278	0.00358229	0.0631406	Padj <0.1
Timm17a	2314.93	-1.17482	0.289112	-3.71767	0.000201071	0.0138864	Padj <0.1
Timm21	687.74	-0.87396	0.256397	-3.0186	0.00253943	0.0516698	Padj <0.1
Timm22	1711.06	-1.04381	0.211628	-4.45974	8.21e-06	0.00232156	Padj <0.1
Timm8a1	1020.51	-1.21098	0.318162	-3.49187	0.000479644	0.021667	Padj <0.1
Tiparp	403.122	1.05664	0.333632	2.86734	0.00413938	0.0678793	Padj <0.1
Tipin	2054.21	-0.828306	0.25379	-2.86972	0.00410835	0.0676018	Padj <0.1
Tln1	5750.49	1.0569	0.319655	2.99354	0.0027576	0.0538951	Padj <0.1
Tma7	4029	-0.822605	0.238948	-3.02411	0.00249364	0.0513013	Padj <0.1
Tmem107	235.436	-1.34046	0.426736	-2.90685	0.00365083	0.0638007	Padj <0.1
Tmem132a	104.718	1.56751	0.528383	2.77735	0.00548034	0.0799239	Padj <0.1
Tmem147	2000.39	-0.963506	0.244967	-3.52498	0.000423514	0.0200785	Padj <0.1
Tmem183a	1038.08	-0.628219	0.163956	-3.22172	0.00127425	0.0349992	Padj <0.1
Tmem184c	153.448	-0.872247	0.290788	-2.65571	0.00791425	0.0994647	Padj <0.1
Tmem208	1347.87	-0.800887	0.181423	-3.86327	0.000111878	0.0104359	Padj <0.1
Tmem234	2975.88	-0.485749	0.143858	-2.68146	0.00733025	0.0958135	Padj <0.1
Tmem30c	160.92	-1.2775	0.324018	-3.63406	0.000278999	0.0160975	Padj <0.1
Tmem33	803.543	-0.817848	0.234157	-3.06567	0.00217185	0.04763	Padj <0.1
Tmem80	470.723	-0.807926	0.264836	-2.67307	0.00751602	0.0972355	Padj <0.1
Tmod3	1802.08	0.730256	0.190254	3.31271	0.000923956	0.0295015	Padj <0.1
Tmtc3	231.195	1.15887	0.304995	3.47175	0.000517081	0.0225905	Padj <0.1
Tnc	22.0252	3.52711	1.2835	2.67013	0.00758214	0.0977287	Padj <0.1
Tnfaip2	1080.42	-1.6418	0.458337	-3.3639	0.000768486	0.0270658	Padj <0.1
Tnfrsf1b	405.186	1.92854	0.59546	3.07081	0.00213481	0.0475793	Padj <0.1
Tnnt2	17.5342	-3.63843	0.897275	-3.94353	8.03e-05	0.00918676	Padj <0.1
Tnrc18	109.828	1.66877	0.436757	3.59186	0.000328321	0.0179253	Padj <0.1
Tomm20	1937.68	-0.73706	0.238321	-2.67312	0.00751497	0.0972355	Padj <0.1
Tomm5	2497.42	-1.42652	0.340554	-3.89519	9.81e-05	0.00985681	Padj <0.1
Tomm6	2050.93	-0.836071	0.217634	-3.38215	0.000719196	0.0261167	Padj <0.1
Tomm70a	1327.14	-1.10264	0.270162	-3.71127	0.00020622	0.014167	Padj <0.1
Tox	131.461	2.55795	0.54632	4.49911	6.82e-06	0.00208567	Padj <0.1
Tpgs1	685.289	-0.712601	0.230376	-2.65914	0.00783415	0.0990802	Padj <0.1
Traf3	271.512	1.65106	0.411289	3.77121	0.000162458	0.0125468	Padj <0.1
Trerf1	239.293	1.30487	0.423177	2.8472	0.00441052	0.0707111	Padj <0.1
Trim68	119.951	1.90386	0.571663	3.15547	0.0016024	0.0408629	Padj <0.1
Trmo	223.645	-0.969812	0.316868	-2.74503	0.00605051	0.0847957	Padj <0.1
Trmt10c	517.038	-0.854028	0.246664	-3.0569	0.0022364	0.0481055	Padj <0.1
Trmt12	303.969	-1.81438	0.348013	-4.92619	8.38e-07	0.000708526	Padj <0.1
Trpm2	1206.85	-1.50928	0.332387	-4.23988	2.24e-05	0.00446183	Padj <0.1
Trrap	1539.37	1.0447	0.21973	4.29935	1.71e-05	0.0039962	Padj <0.1
Tshb	22.538	3.7443	0.987392	3.69083	0.000223526	0.0146493	Padj <0.1
Tsr3	648.085	-1.06729	0.2637	-3.66814	0.000244321	0.0153261	Padj <0.1
Ttc8	102.154	1.93254	0.531604	3.4472	0.000566437	0.0235508	Padj <0.1
Tubd1	340.538	-1.45391	0.2914	-4.64622	3.38e-06	0.00134901	Padj <0.1
Tvp23a	15.7365	3.61833	0.962009	3.65728	0.000254911	0.0155857	Padj <0.1
Txnl4a	4588.64	-0.645259	0.202464	-2.69312	0.00707878	0.094196	Padj <0.1
Txnl4a.1	1416.93	-0.916901	0.223577	-3.65378	0.000258407	0.0155857	Padj <0.1
Uba52	6318.55	-0.571509	0.170227	-2.76989	0.00560755	0.0809572	Padj <0.1
Ubac1	1563.92	-1.47016	0.409529	-3.3457	0.000820756	0.0275502	Padj <0.1
Ubac2	893.316	0.752023	0.245746	2.65324	0.00797239	0.0997591	Padj <0.1
Ubash3a	362.343	-1.7129	0.567539	-2.84192	0.00448431	0.0713368	Padj <0.1
Ube2j2	657.08	-0.689153	0.199915	-2.94701	0.00320862	0.0592441	Padj <0.1
Ube2m	491.625	-0.63852	0.185845	-2.89768	0.00375933	0.0647516	Padj <0.1
Ube2v2	752.302	-0.861681	0.262826	-2.89804	0.003755	0.0647516	Padj <0.1
Uchl3	1240.28	-0.879027	0.24857	-3.13403	0.00172423	0.0424547	Padj <0.1
Uchl5	3840.9	-1.02594	0.297848	-3.10878	0.00187862	0.0446795	Padj <0.1
Ufsp2	871.11	-0.638321	0.199644	-2.69641	0.00700921	0.0938372	Padj <0.1
Umps	2955.43	-0.937142	0.269745	-3.10346	0.00191273	0.0450611	Padj <0.1
Upk3b	12.785	6.50846	2.17225	2.95015	0.00317623	0.0590394	Padj <0.1
Uqcc2	1611.41	-0.789299	0.259193	-2.65941	0.00782785	0.0990802	Padj <0.1
Uqcr10	3740.77	-0.759034	0.2367	-2.78425	0.00536511	0.0786952	Padj <0.1
Uqcr11	6770.27	-0.916156	0.226165	-3.60868	0.00030776	0.0173371	Padj <0.1
Uqcrq	3102.96	-0.91873	0.223672	-3.6604	0.00025182	0.0155857	Padj <0.1
Urod	4767.08	-1.31568	0.441829	-2.75148	0.00593275	0.0840472	Padj <0.1
Uros	910.98	-1.41009	0.431502	-3.03612	0.00239641	0.0499158	Padj <0.1
Usp1	718.23	-0.747603	0.230226	-2.8129	0.00490962	0.0754297	Padj <0.1
Usp39	1481.19	-0.914869	0.266934	-3.0527	0.00226791	0.0484038	Padj <0.1
Utp18	544.282	-1.31904	0.33545	-3.63403	0.000279032	0.0160975	Padj <0.1
Utrn	747.277	1.21032	0.363146	3.05749	0.00223199	0.0481055	Padj <0.1
Uvssa	223.225	1.32566	0.315754	3.88171	0.000103726	0.0101363	Padj <0.1
Uxt	689.858	-0.794326	0.235314	-2.95064	0.0031712	0.0590394	Padj <0.1
Vac14	688.094	-0.845617	0.247525	-3.01229	0.00259281	0.052165	Padj <0.1
Vamp1	112.745	2.21036	0.504592	4.18231	2.89e-05	0.00499413	Padj <0.1
Vamp3	5123.99	-0.841247	0.224963	-3.29497	0.000984316	0.0308054	Padj <0.1
Vamp5	3066.49	-0.799244	0.244819	-2.85617	0.00428788	0.0693642	Padj <0.1
Vamp8	4420.36	-0.809741	0.217764	-3.25922	0.00111717	0.032496	Padj <0.1
Vangl2	242.488	1.14758	0.296517	3.53295	0.000410954	0.0196417	Padj <0.1
Vash1	16.3234	2.78842	0.960156	2.79998	0.00511052	0.0770458	Padj <0.1
Vdac3	3360.2	-0.764488	0.201777	-3.29317	0.000990636	0.0309308	Padj <0.1
Vdr	97.6604	3.57252	0.63441	5.47363	4.41e-08	0.000103557	Padj <0.1
Vgll4	719.387	0.812342	0.218473	3.26054	0.001112	0.032496	Padj <0.1
Vmac	228.901	1.23072	0.296215	3.81721	0.000134969	0.0113435	Padj <0.1
Vmn1r17	6.00536	3.42852	1.14586	2.90482	0.00367464	0.0639834	Padj <0.1
Vmn1r38	10.7071	2.47319	0.850135	2.79154	0.00524575	0.0778462	Padj <0.1
Vmn1r90	21.1261	2.62828	0.774686	3.26362	0.00109999	0.032496	Padj <0.1
Washc4	533.083	0.945631	0.266514	3.17294	0.00150905	0.0391998	Padj <0.1
Wdcp	1113.19	-1.28899	0.30524	-3.89526	9.81e-05	0.00985681	Padj <0.1
Wdfy4	387.198	1.48589	0.488861	2.83493	0.00458364	0.0721687	Padj <0.1
Wdr13	473.028	0.946676	0.278778	3.0371	0.00238863	0.0498731	Padj <0.1
Wdr19	88.8854	1.4802	0.478091	2.8869	0.00389057	0.0658281	Padj <0.1
Wdr46.ps	9.72087	4.62451	1.20905	3.74221	0.000182407	0.0132609	Padj <0.1
Wdr53	203.919	-0.99289	0.285474	-3.12775	0.00176152	0.0431077	Padj <0.1
Wdr55	1075.2	-1.24704	0.343163	-3.34255	0.000830134	0.0276575	Padj <0.1
Wdr61	2371.22	-1.09001	0.251697	-3.93333	8.38e-05	0.00918676	Padj <0.1
Wdr74	1659.68	-1.08062	0.283909	-3.454	0.000552328	0.0234047	Padj <0.1
Wdr86	22.4926	3.81013	1.09429	3.39044	0.000697808	0.0258351	Padj <0.1
Wls	1063.93	0.847779	0.231884	3.22479	0.00126065	0.0349712	Padj <0.1
Wrnip1	409.727	-1.24046	0.363739	-3.13537	0.00171639	0.0424547	Padj <0.1
Xaf1	958.048	-1.12479	0.335736	-3.05238	0.00227038	0.0484038	Padj <0.1
Xylt1	154.715	1.35726	0.302768	4.15254	3.29e-05	0.00536736	Padj <0.1
Ybx1	7116.08	-1.32465	0.22472	-5.44967	5.05e-08	0.000103557	Padj <0.1
Ybx3	1362.85	-1.07162	0.326725	-2.9738	0.00294135	0.0561868	Padj <0.1
Ylpm1	749.69	0.527574	0.139366	3.06799	0.00215504	0.04763	Padj <0.1
Zan	76.2691	3.12052	0.564026	5.35529	8.54e-08	0.000136338	Padj <0.1
Zbed6	62.0316	3.43365	0.995884	3.34743	0.00081566	0.0275502	Padj <0.1
Zbtb26	78.2481	1.30764	0.409416	2.94967	0.0031811	0.0590394	Padj <0.1
Zc3h12d	18.5321	3.26081	0.931448	3.39344	0.000690216	0.0257531	Padj <0.1
Zcchc17	1342.85	-0.807599	0.206074	-3.43371	0.000595371	0.02426	Padj <0.1
Zcrb1	636.883	-0.621348	0.157381	-3.31265	0.000924167	0.0295015	Padj <0.1
Zdhhc1	258.269	1.62604	0.551213	2.76852	0.00563123	0.0810547	Padj <0.1
Zdhhc17	329.65	0.900099	0.24238	3.30101	0.000963367	0.0303482	Padj <0.1
Zer1	252.187	1.00542	0.33136	2.73243	0.00628687	0.0872809	Padj <0.1
Zfhx3	233.13	1.51935	0.445369	3.18692	0.00143798	0.0382589	Padj <0.1
Zfp131	6407.88	-1.44595	0.305951	-4.39923	1.09e-05	0.00294437	Padj <0.1
Zfp146	66.6194	1.97684	0.649931	2.88775	0.00388011	0.0658061	Padj <0.1
Zfp157	236.157	1.23196	0.278015	4.07159	4.67e-05	0.00674067	Padj <0.1
Zfp260	620.322	0.968609	0.256538	3.38589	0.000709478	0.0261166	Padj <0.1
Zfp266	630.577	1.17604	0.29569	3.63909	0.000273607	0.0159272	Padj <0.1
Zfp280c	186.349	1.12015	0.251788	4.05163	5.09e-05	0.00694348	Padj <0.1
Zfp292	652.229	0.905281	0.264365	3.0461	0.00231833	0.0489748	Padj <0.1
Zfp36	1003.61	1.53798	0.473239	3.03859	0.00237691	0.0497005	Padj <0.1
Zfp410	2228.42	-1.01377	0.274144	-3.33318	0.000858598	0.0282884	Padj <0.1
Zfp455	17.4762	3.87688	0.975909	3.87012	0.000108784	0.0103693	Padj <0.1
Zfp512b	1083.16	0.862103	0.283166	2.69136	0.00711605	0.0943879	Padj <0.1
Zfp518b	97.9857	1.47306	0.417956	3.28518	0.00101918	0.0314441	Padj <0.1
Zfp524	144.34	-0.886364	0.240579	-3.26863	0.0010807	0.0324775	Padj <0.1
Zfp608	335.979	2.62279	0.523916	4.81525	1.47e-06	0.000812258	Padj <0.1
Zfp609	149.366	1.24575	0.414258	2.76578	0.00567872	0.0815054	Padj <0.1
Zfp619	25.088	2.99015	0.782773	3.6922	0.000222325	0.0146493	Padj <0.1
Zfp622	451.384	-0.863273	0.239104	-3.19222	0.00141186	0.0378383	Padj <0.1
Zfp768	143.85	1.36573	0.403812	3.13446	0.00172174	0.0424547	Padj <0.1
Zfp78	43.5448	-1.8375	0.561478	-3.09452	0.00197133	0.0459591	Padj <0.1
Zfp820	79.6774	2.06859	0.363534	5.41515	6.12e-08	0.000109957	Padj <0.1
Zfp827	100.878	1.78003	0.343581	4.88976	1.01e-06	0.000751868	Padj <0.1
Zfp831	61.9451	3.8725	0.77896	4.843	1.28e-06	0.000760471	Padj <0.1
Zfp871	390.946	1.35004	0.293545	4.25843	2.06e-05	0.00434887	Padj <0.1
Zfp935	679.088	-0.926113	0.25307	-3.26437	0.00109709	0.0324943	Padj <0.1
Zfp94	111.899	1.00797	0.328715	2.76219	0.00574152	0.0819851	Padj <0.1
Zfp942	182.609	0.852053	0.245137	3.06789	0.00215574	0.04763	Padj <0.1
Zfp950	294.393	1.10837	0.284044	3.55006	0.000385149	0.019234	Padj <0.1
Zfp966	9.71458	6.12093	1.61733	3.72276	0.000197056	0.0138083	Padj <0.1
Zfp976	48.7446	1.73189	0.588651	2.77225	0.00556704	0.0807795	Padj <0.1
Zfr2	23.8941	2.21031	0.691386	3.05228	0.00227109	0.0484038	Padj <0.1
Zhx3	301.818	1.07218	0.255285	3.80822	0.000139971	0.0115023	Padj <0.1
Zim1	10.1838	3.31099	1.16966	2.74522	0.00604702	0.0847957	Padj <0.1
Zmym6	163.743	0.91303	0.278839	2.91577	0.00354813	0.0627696	Padj <0.1
Znhit3	794.8	-1.12535	0.260481	-3.93635	8.27e-05	0.00918676	Padj <0.1
Zyg11b	374.555	0.915779	0.287126	2.84118	0.00449463	0.071343	Padj <0.1
