# Supplementary material for: Fetal liver macrophages contribute to the hematopoietic stem cell niche by controlling granulopoiesis
Source: eLife. 2024 Mar 25;13:e86493. doi: 10.7554/eLife.86493 (PMC11006421; doi:10.7554/eLife.86493)
Supplement: Supplementary file 4. [file elife-86493-supp4.xlsx]

## Sheet: Sheet1
	ID	Description	GeneRatio	BgRatio	pvalue	p.adjust	qvalue	geneID	Count
Up-regualted	GO:0006325	chromatin organization	33/579	477/29008	7.92862e-10	3.14494e-06	2.20475e-06	Ash1l/Atf7ip/Atrx/Baz2a/Brdt/Cbx6/Cbx7/Chd6/Dnmt3a/Dnmt3b/Dtx3l/Emsy/Eya1/Gata3/Hdac9/Hmg20a/Kdm2a/Kdm5b/Kdm6b/Kmt2c/Kmt2d/Mecom/Padi4/Pkn1/Prdm16/Rere/Rsbn1/Smarcad1/Tasor/Tet1/Tox/Trrap/Zfp518b	33
Up-regualted	GO:0060537	muscle tissue development	33/579	486/29008	1.27017e-09	3.14494e-06	2.20475e-06	Akap13/Alpk3/Angpt1/Bcl2/Bcl9/Camk2d/Col14a1/Dkk1/Egr1/Eya1/Foxp1/Frs2/Hdac9/Hlf/Kdm6b/Mef2c/Meis1/Mybpc3/Neb/Nox4/Nr4a1/P2rx2/Plec/Ppargc1a/Ryr2/Sik1/Ski/Smad3/Svil/Tenm4/Tiparp/Vgll4/Zfp950	33
Up-regualted	GO:0014706	striated muscle tissue development	30/579	461/29008	1.89134e-08	1.15642e-05	8.10706e-06	Akap13/Alpk3/Angpt1/Bcl2/Bcl9/Camk2d/Col14a1/Dkk1/Egr1/Eya1/Foxp1/Frs2/Hdac9/Hlf/Kdm6b/Mef2c/Meis1/Mybpc3/Neb/Nox4/Nr4a1/P2rx2/Plec/Ryr2/Sik1/Ski/Smad3/Svil/Tenm4/Vgll4	30
Up-regualted	GO:1903131	mononuclear cell differentiation	30/579	489/29008	6.97837e-08	2.28737e-05	1.60355e-05	Abl1/Bcl2/Braf/Cdh17/Clcf1/Clec4e/Dock2/Egr1/Foxp1/Gata3/Hdac9/Il1rl2/Inpp5d/Irf1/Jun/Lilrb4b/Lmbr1l/Mef2c/Nfkbid/Pbx1/Pglyrp2/Plcg2/Pou2f2/Ptprc/Rc3h2/Runx2/Stat3/Tox/Zfp608/Zfp609	30
Up-regualted	GO:0060562	epithelial tube morphogenesis	29/579	394/29008	2.11416e-09	3.48977e-06	2.44649e-06	Abl1/Angpt1/Bcl2/Etv5/Eya1/Foxp1/Fzd3/Gata3/Gdf2/Gna13/Kdm2a/Kdm5b/Lama5/Mef2c/Mib1/Mycn/Nphp3/Pbx1/Pkd2/Ryr2/Shank3/Ski/Slit2/Smad3/Spry1/Tmtc3/Tnc/Vangl2/Vdr	29
Up-regualted	GO:0001667	ameboidal-type cell migration	29/579	444/29008	3.01713e-08	1.24507e-05	8.72852e-06	Abl1/Acvr1b/Angpt1/Bmpr2/Braf/Epb41l4b/Foxp1/Gata2/Gata3/Gdf2/Hdac9/Iqgap1/Itgav/Jun/Lama5/Mecp2/Mef2c/Nr4a1/Pik3c2a/Pik3cg/Pkn1/Plcg2/Plec/Ric8a/Rreb1/Slit2/Spag6l/Syne2/Vash1	29
Up-regualted	GO:0030098	lymphocyte differentiation	28/579	441/29008	9.42516e-08	2.61987e-05	1.83665e-05	Abl1/Bcl2/Braf/Cdh17/Clcf1/Clec4e/Dock2/Egr1/Foxp1/Gata3/Hdac9/Il1rl2/Inpp5d/Irf1/Lilrb4b/Lmbr1l/Nfkbid/Pbx1/Pglyrp2/Plcg2/Pou2f2/Ptprc/Rc3h2/Runx2/Stat3/Tox/Zfp608/Zfp609	28
Up-regualted	GO:0048608	reproductive structure development	28/579	480/29008	5.27291e-07	8.70382e-05	6.10178e-05	Angpt1/Ash1l/Atn1/Atrx/Bcl2/Birc6/Bmpr2/Ccn1/Fndc3a/Frs2/Gata2/Gata3/Hoxa10/Hoxa9/Itgav/Junb/Kdm5b/Lhcgr/Map7/Nrip1/Pkd2/Plaur/Rhobtb3/Socs3/Tiparp/Tnc/Vash1/Wdr19	28
Up-regualted	GO:0061458	reproductive system development	28/579	484/29008	6.21846e-07	9.93349e-05	6.96383e-05	Angpt1/Ash1l/Atn1/Atrx/Bcl2/Birc6/Bmpr2/Ccn1/Fndc3a/Frs2/Gata2/Gata3/Hoxa10/Hoxa9/Itgav/Junb/Kdm5b/Lhcgr/Map7/Nrip1/Pkd2/Plaur/Rhobtb3/Socs3/Tiparp/Tnc/Vash1/Wdr19	28
Up-regualted	GO:0001655	urogenital system development	27/579	385/29008	2.10174e-08	1.15642e-05	8.10706e-06	Acvr2b/Angpt1/Bcl2/Cux1/Egr1/Eya1/Frs2/Gata2/Gata3/Gcnt4/Gdf11/Lama5/Mecom/Mef2c/Nphp3/Pbx1/Pkd2/Plaur/Slit2/Smad3/Smad5/Spry1/Tiparp/Tnc/Ttc8/Vangl2/Zfp950	27
Up-regualted	GO:1903706	regulation of hemopoiesis	27/579	398/29008	4.17627e-08	1.59084e-05	1.11525e-05	Abl1/Acvr1b/Braf/Fgfr3/Foxp1/Gata2/Gata3/Hoxa9/Il1rl2/Inpp5d/Irf1/Jun/Lilrb4b/Mef2c/Meis1/Nfkbid/Pglyrp2/Prdm16/Ptprc/Rassf2/Rc3h2/Slc9b2/Stat3/Tox/Zfp36/Zfp608/Zfp609	27
Up-regualted	GO:0032970	regulation of actin filament-based process	27/579	416/29008	1.02751e-07	2.67801e-05	1.87741e-05	Abi2/Abl1/Akap13/Arap1/Braf/Fchsd2/Hip1r/Iqgap1/Kcnj2/Mef2c/Neb/Nox4/Pde4d/Ppp1r9a/Rhobtb3/Rictor/Rnd3/Ryr2/Shank3/Slit2/Smad3/Stap1/Svil/Taok1/Tmod3/Ttc8/Vangl2	27
Up-regualted	GO:0007264	small GTPase mediated signal transduction	27/579	425/29008	1.57897e-07	3.568e-05	2.50133e-05	Abi2/Abl1/Akap13/Arhgap30/Arhgef11/Arhgef2/Camk2d/Chml/Ctnnal1/Dennd1a/Dennd4c/Dock2/Dock4/Elmo1/Farp2/Gna13/Itgav/Jun/Ksr2/P2ry10b/Pik3cg/Rasal3/Rnd3/Scai/Slit2/Spry1/Vangl2	27
Up-regualted	GO:0030099	myeloid cell differentiation	27/579	426/29008	1.65484e-07	3.568e-05	2.50133e-05	Acvr1b/Cd300lf/Farp2/Fgfr3/Foxp1/Gata2/Gata3/Hoxa9/Inpp5d/Jun/Junb/Lilrb4b/Lrrk1/Mef2c/Meis1/Mfap2/Nbeal2/Prdm16/Rassf2/Sbno2/Slc9b2/Smad5/Snx10/Stap1/Stat3/Tmod3/Zfp36	27
Up-regualted	GO:0042692	muscle cell differentiation	27/579	428/29008	1.81682e-07	3.74871e-05	2.62802e-05	Akap13/Alpk3/Bcl2/Bcl9/Bmpr2/Camk2d/Col14a1/Dkk1/Foxp1/Frs2/Hdac9/Kdm6b/Mecp2/Mef2c/Mrtfa/Mybpc3/Neb/Nox4/P2rx2/Plec/Sik1/Ski/Syne1/Tmod3/Tmtc3/Vangl2/Zbed6	27
Up-regualted	GO:0016570	histone modification	27/579	461/29008	7.78144e-07	0.000120418	8.44183e-05	Arid5a/Ash1l/Atrx/Baz2a/Dnmt3b/Dtx3l/Eya1/Gata2/Gata3/Hdac9/Huwe1/Kdm2a/Kdm5b/Kdm6b/Kmt2c/Kmt2d/Lcor/Map3k12/Mecp2/Padi4/Per1/Pkn1/Rest/Smarcad1/Tet1/Trerf1/Trrap	27
Up-regualted	GO:0048732	gland development	27/579	477/29008	1.49226e-06	0.000175945	0.000123345	Abl1/Ash1l/Atf7/Bcl2/Braf/Cbx7/Eda/Etv5/Frs2/Gata2/Gata3/Hoxa9/Itpr1/Jun/Kdm5b/Lama5/Nphp3/Pbx1/Pkd2/Plaur/Rreb1/Slit2/Smad3/Tnc/Vdr/Wls/Zfp157	27
Up-regualted	GO:0007389	pattern specification process	27/579	482/29008	1.81682e-06	0.000205339	0.000143952	Acvr2b/Bmpr2/Dkk1/Eya1/Frs2/Gdf11/Gpr161/Hoxa10/Hoxa9/Hoxb6/Kdm2a/Mapk8/Mef2c/Meis1/Mib1/Nphp3/Pbx1/Pkd2/Rfx3/Ski/Smad3/Spry1/Tasor/Ttc8/Vangl2/Wdr19/Wls	27
Up-regualted	GO:0051052	regulation of DNA metabolic process	25/579	388/29008	3.49097e-07	6.64896e-05	4.66122e-05	Atrx/Bmpr2/Camk2d/Cdkn1a/Clcf1/Dnmt3a/Dtx3l/Eya1/Fam168a/Fus/Gata3/Gdf2/Kcnq1ot1/Mecp2/Nox4/Parp3/Ppargc1a/Ptprc/Rnf169/Smarcad1/Smg1/Smg6/Tet1/Tox/Ylpm1	25
Up-regualted	GO:0007015	actin filament organization	25/579	453/29008	5.65057e-06	0.000466361	0.00032694	Abi2/Abl1/Arap1/Arhgef2/Bcl2/Braf/Coro7/Diaph2/Elmo1/Fchsd2/Hip1r/Neb/Nox4/Plec/Ppp1r9a/Rhobtb3/Rictor/Rnd3/Shank3/Slit2/Smad3/Spag6l/Svil/Tmod3/Ttc8	25
Up-regualted	GO:0045785	positive regulation of cell adhesion	25/579	471/29008	1.10138e-05	0.000710752	0.00049827	Abl1/Angpt1/Braf/Ccn1/Cd274/Disc1/Epb41l4b/Gata3/Il1rl2/Iqgap1/Irf1/Itgav/Lilrb4b/Nfat5/Nfkbid/Pde4d/Plaur/Ptprc/Rasal3/Rreb1/Selp/Smad3/Utrn/Zfhx3/Zfp609	25
Up-regualted	GO:0006874	cellular calcium ion homeostasis	25/579	490/29008	2.13715e-05	0.00112587	0.000789286	Abl1/Atp2a3/Bcl2/Camk2d/Disc1/Dlg4/Efhc1/Gata2/Gck/Gna13/Itgav/Itpr1/Lhcgr/P2rx2/P2ry10b/Pde4d/Pik3cg/Pkd2/Plcg2/Ptprc/Ramp3/Ryr2/Slc25a27/Smad3/Vdr	25
Up-regualted	GO:0034765	regulation of ion transmembrane transport	25/579	497/29008	2.70096e-05	0.00132427	0.000928377	Abl1/Cacna2d4/Camk2d/Dlg4/Fgf11/Fhl4/Fxyd7/Gem/Kcnd1/Kcnh2/Kcnj2/Klhl24/Lhcgr/Mef2c/Nlgn2/Pde4d/Pik3c2a/Pik3cg/Pkd2/Plcg2/Ppargc1a/Ramp3/Ryr2/Sestd1/Shank3	25
Up-regualted	GO:0032956	regulation of actin cytoskeleton organization	24/579	368/29008	4.81253e-07	8.33639e-05	5.84419e-05	Abi2/Abl1/Akap13/Arap1/Braf/Fchsd2/Hip1r/Iqgap1/Mef2c/Neb/Nox4/Ppp1r9a/Rhobtb3/Rictor/Rnd3/Shank3/Slit2/Smad3/Stap1/Svil/Taok1/Tmod3/Ttc8/Vangl2	24
Up-regualted	GO:1902903	regulation of supramolecular fiber organization	24/579	388/29008	1.23238e-06	0.000154304	0.000108174	Abi2/Abl1/Akap13/Arap1/Arhgef2/Braf/Fchsd2/Hdgfl3/Hip1r/Mapk8/Mecp2/Mef2c/Nav3/Nox4/Ppp1r9a/Rictor/Shank3/Slain1/Slit2/Smad3/Svil/Taok1/Tmod3/Ttc8	24
Up-regualted	GO:0001503	ossification	24/579	417/29008	4.27981e-06	0.000359214	0.000251826	Acvr2b/Bcl2/Bmpr2/Ccn1/Dkk1/Fgfr3/Gdf2/Junb/Mapk8/Mef2c/Nab2/Pbx1/Rassf2/Rest/Runx2/Sbno2/Ski/Smad3/Smad5/Snx10/Suco/Vdr/Xylt1/Zhx3	24
Up-regualted	GO:0010959	regulation of metal ion transport	24/579	443/29008	1.17656e-05	0.00073751	0.000517028	Abl1/Bcl2/Camk2d/Fgf11/Fhl4/Fxyd7/Gck/Gem/Itpr1/Kcnh2/Kcnj2/Klhl24/Lhcgr/Pde4d/Per1/Pik3c2a/Pik3cg/Pkd2/Plcg2/Ramp3/Ryr2/Sestd1/Sik1/Vdr	24
Up-regualted	GO:0002683	negative regulation of immune system process	24/579	460/29008	2.17301e-05	0.00113271	0.000794083	Angpt1/Cblb/Cd274/Cd300lf/Clnk/Gata2/Inpp5d/Irf1/Lilrb4b/Mapkbp1/Nfkbid/Nlrc5/Oas1c/Oas3/Parp3/Pglyrp2/Pkn1/Prdm16/Ptprc/Rc3h2/Slit2/Stap1/Zc3h12d/Zfp608	24
Up-regualted	GO:0050673	epithelial cell proliferation	24/579	471/29008	3.17281e-05	0.00146839	0.00102941	Bmpr2/Cd34/Eya1/Fgfr3/Foxp1/Frs2/Gata2/Gata3/Gdf2/Itpr1/Jun/Kdm5b/Mef2c/Nr4a1/Reg2/Rictor/Rreb1/Smad3/Stat3/Stxbp4/Vash1/Vdr/Wdr13/Zfp36	24
Up-regualted	GO:0009896	positive regulation of catabolic process	24/579	494/29008	6.70267e-05	0.00219911	0.00154168	Abcd2/Cblb/Disc1/Dtx3l/Fyco1/Gck/Huwe1/Mapk8/Pik3c2a/Pim2/Pum1/Rc3h2/Rnf180/Samd4b/Sesn3/Tiparp/Tmtc3/Tnfrsf1b/Trim68/Vgll4/Zc3h12d/Zer1/Zfp36/Zyg11b	24
Up-regualted	GO:0001819	positive regulation of cytokine production	24/579	500/29008	8.07251e-05	0.00249844	0.00175152	Abl1/Agpat2/Arhgef2/Arid5a/Cd274/Cd34/Clec4e/Clnk/Egr1/Foxp1/Gata3/Gdf2/Il12rb2/Il1rl2/Irf1/Naip5/Oas1c/Oas3/Pde4d/Plcg2/Pou2f2/Ptprc/Smad3/Stat3	24
Up-regualted	GO:0072001	renal system development	23/579	342/29008	4.88197e-07	8.33639e-05	5.84419e-05	Acvr2b/Angpt1/Bcl2/Cux1/Egr1/Eya1/Gata3/Gcnt4/Gdf11/Lama5/Mecom/Mef2c/Nphp3/Pbx1/Pkd2/Slit2/Smad3/Smad5/Spry1/Tiparp/Ttc8/Vangl2/Zfp950	23
Up-regualted	GO:1904062	regulation of cation transmembrane transport	23/579	376/29008	2.46948e-06	0.000249568	0.000174959	Abl1/Camk2d/Dlg4/Fgf11/Fhl4/Fxyd7/Gem/Kcnh2/Kcnj2/Klhl24/Lhcgr/Mef2c/Nlgn2/Pde4d/Pik3c2a/Pik3cg/Pkd2/Plcg2/Ppargc1a/Ramp3/Ryr2/Sestd1/Shank3	23
Up-regualted	GO:0050678	regulation of epithelial cell proliferation	23/579	403/29008	7.74481e-06	0.000564565	0.000395786	Bmpr2/Eya1/Fgfr3/Foxp1/Frs2/Gata2/Gata3/Gdf2/Itpr1/Jun/Kdm5b/Mef2c/Nr4a1/Reg2/Rictor/Rreb1/Smad3/Stat3/Stxbp4/Vash1/Vdr/Wdr13/Zfp36	23
Up-regualted	GO:0070997	neuron death	23/579	428/29008	2.02427e-05	0.00110156	0.000772242	Abl1/Angpt1/Atn1/Bcl2/Braf/Cd34/Clcf1/Dkk1/Egr1/Fgfr3/Gata3/Itpr1/Jun/Map3k12/Mapk8/Mecp2/Mef2c/Ppargc1a/Rest/Slc25a27/Stat3/Tert/Tnfrsf1b	23
Up-regualted	GO:0033674	positive regulation of kinase activity	23/579	435/29008	2.60912e-05	0.00129204	0.000905777	Abl1/Acvr2b/Akap13/Angpt1/Btc/Camkk2/Ccn1/Cdkn1a/Dkk1/Dlg4/Egr1/Fgfr3/Iqgap1/Map3k12/Nab2/Nox4/Pik3cg/Pkd2/Ppp1r9a/Ptprc/Rassf2/Stap1/Vangl2	23
Up-regualted	GO:0010563	negative regulation of phosphorus metabolic process	23/579	453/29008	4.8718e-05	0.00181586	0.001273	Abl1/Angpt1/Cblb/Cdkn1a/Dkk1/Iqgap1/Irf1/Jun/Lilrb4b/Lrrk1/Nron/Pde4d/Pik3ip1/Pkn1/Plec/Ppargc1a/Ptprc/Rassf2/Slit2/Socs3/Spry1/Stap1/Stat3	23
Up-regualted	GO:0045936	negative regulation of phosphate metabolic process	23/579	453/29008	4.8718e-05	0.00181586	0.001273	Abl1/Angpt1/Cblb/Cdkn1a/Dkk1/Iqgap1/Irf1/Jun/Lilrb4b/Lrrk1/Nron/Pde4d/Pik3ip1/Pkn1/Plec/Ppargc1a/Ptprc/Rassf2/Slit2/Socs3/Spry1/Stap1/Stat3	23
Up-regualted	GO:0007346	regulation of mitotic cell cycle	23/579	462/29008	6.56169e-05	0.00218077	0.00152882	Abl1/Bcl2/Btc/Camk2d/Cdc14a/Cdkn1a/Fgfr3/Fhl4/Fzd3/Gpr132/Iqgap1/Klhl18/Mecp2/Pbx1/Pim2/Pkd2/Sik1/Smad3/Taok1/Tert/Tmod3/Trrap/Zc3h12d	23
Up-regualted	GO:0044770	cell cycle phase transition	23/579	492/29008	0.000166102	0.00393558	0.00275902	Acvr1b/Bcl2/Camk2d/Ccng2/Cdc14a/Cdkn1a/Cirbp/Clock/Fhl4/Gpr132/Klhl18/Mecp2/Pbx1/Pim2/Pkd2/Plcg2/Ptprc/Stxbp4/Taok1/Tert/Tmod3/Trrap/Zc3h12d	23
Up-regualted	GO:0006281	DNA repair	23/579	495/29008	0.000181344	0.00419634	0.00294183	Abl1/Atrx/Dtx3l/Emsy/Eya1/Fam168a/Fan1/Fus/Hdac9/Herc2/Huwe1/Ino80d/Kdm2a/Parp3/Paxx/Pds5b/Rnf169/Setx/Smarcad1/Smg1/Taok1/Trrap/Uvssa	23
Up-regualted	GO:0045860	positive regulation of protein kinase activity	22/579	358/29008	3.78095e-06	0.000328478	0.000230278	Abl1/Acvr2b/Akap13/Angpt1/Btc/Camkk2/Ccn1/Cdkn1a/Dkk1/Dlg4/Egr1/Iqgap1/Map3k12/Nab2/Nox4/Pik3cg/Pkd2/Ppp1r9a/Ptprc/Rassf2/Stap1/Vangl2	22
Up-regualted	GO:0003012	muscle system process	22/579	425/29008	5.32146e-05	0.00190956	0.00133869	Akap13/Camk2d/Ccdc78/Chrnb4/Col14a1/Dock4/Foxp1/Gucy1a1/Kcnh2/Kcnj2/Mef2c/Mybpc3/Nr4a1/P2rx2/Pde4d/Pgam2/Prkg1/Ryr2/Smad3/Smad5/Tmod3/Tnfrsf1b	22
Up-regualted	GO:0001654	eye development	22/579	430/29008	6.31874e-05	0.00215796	0.00151283	Abi2/Acvr2b/Bcl2/Bmpr2/Fgfr3/Frs2/Gata3/Gdf11/Jun/Kmt2c/Meis1/Mfap2/Pbx1/Pds5b/Pou2f1/Six5/Ski/Smad3/Spry1/Stat3/Ttc8/Wdr19	22
Up-regualted	GO:0150063	visual system development	22/579	433/29008	6.99422e-05	0.00224905	0.00157669	Abi2/Acvr2b/Bcl2/Bmpr2/Fgfr3/Frs2/Gata3/Gdf11/Jun/Kmt2c/Meis1/Mfap2/Pbx1/Pds5b/Pou2f1/Six5/Ski/Smad3/Spry1/Stat3/Ttc8/Wdr19	22
Up-regualted	GO:0048880	sensory system development	22/579	437/29008	7.9948e-05	0.00248995	0.00174557	Abi2/Acvr2b/Bcl2/Bmpr2/Fgfr3/Frs2/Gata3/Gdf11/Jun/Kmt2c/Meis1/Mfap2/Pbx1/Pds5b/Pou2f1/Six5/Ski/Smad3/Spry1/Stat3/Ttc8/Wdr19	22
Up-regualted	GO:0043254	regulation of protein-containing complex assembly	22/579	451/29008	0.000125767	0.00329523	0.0023101	Abi2/Abl1/Arhgef2/Atf7ip/Cdh17/Dkk1/Farp2/Fchsd2/Hip1r/Ikbke/Mapk8/Mecp2/Nav3/Plcg2/Ppp1r9a/Rictor/Selp/Slain1/Slit2/Svil/Tmod3/Zdhhc1	22
Up-regualted	GO:0001763	morphogenesis of a branching structure	21/579	245/29008	2.66826e-08	1.2012e-05	8.42096e-06	Abl1/Angpt1/Bcl2/Etv5/Eya1/Frs2/Gdf2/Gna13/Kdm5b/Lama5/Mecp2/Mycn/Pbx1/Rere/Slit2/Socs3/Spry1/Tmtc3/Tnc/Vangl2/Vdr	21
Up-regualted	GO:0010631	epithelial cell migration	21/579	306/29008	1.10329e-06	0.000153532	0.000107633	Abl1/Angpt1/Bmpr2/Epb41l4b/Foxp1/Gata2/Gata3/Gdf2/Hdac9/Itgav/Jun/Mecp2/Mef2c/Nr4a1/Pik3c2a/Pik3cg/Pkn1/Plcg2/Rreb1/Slit2/Vash1	21
Up-regualted	GO:0090132	epithelium migration	21/579	308/29008	1.2249e-06	0.000154304	0.000108174	Abl1/Angpt1/Bmpr2/Epb41l4b/Foxp1/Gata2/Gata3/Gdf2/Hdac9/Itgav/Jun/Mecp2/Mef2c/Nr4a1/Pik3c2a/Pik3cg/Pkn1/Plcg2/Rreb1/Slit2/Vash1	21
Up-regualted	GO:0090130	tissue migration	21/579	310/29008	1.35863e-06	0.000164096	0.000115038	Abl1/Angpt1/Bmpr2/Epb41l4b/Foxp1/Gata2/Gata3/Gdf2/Hdac9/Itgav/Jun/Mecp2/Mef2c/Nr4a1/Pik3c2a/Pik3cg/Pkn1/Plcg2/Rreb1/Slit2/Vash1	21
Up-regualted	GO:1902105	regulation of leukocyte differentiation	21/579	320/29008	2.24977e-06	0.000237039	0.000166175	Abl1/Braf/Fgfr3/Foxp1/Gata2/Gata3/Il1rl2/Inpp5d/Irf1/Jun/Lilrb4b/Nfkbid/Pglyrp2/Prdm16/Ptprc/Rassf2/Rc3h2/Slc9b2/Tox/Zfp608/Zfp609	21
Up-regualted	GO:0001822	kidney development	21/579	327/29008	3.16073e-06	0.00029532	0.000207033	Acvr2b/Angpt1/Bcl2/Cux1/Egr1/Eya1/Gata3/Gcnt4/Gdf11/Lama5/Mef2c/Nphp3/Pbx1/Pkd2/Slit2/Smad3/Smad5/Spry1/Tiparp/Vangl2/Zfp950	21
Up-regualted	GO:0007265	Ras protein signal transduction	21/579	330/29008	3.64498e-06	0.000328181	0.00023007	Abi2/Abl1/Akap13/Arhgef11/Arhgef2/Camk2d/Ctnnal1/Dennd1a/Dennd4c/Dock2/Elmo1/Farp2/Gna13/Jun/Ksr2/P2ry10b/Pik3cg/Rasal3/Scai/Spry1/Vangl2	21
Up-regualted	GO:0048562	embryonic organ morphogenesis	21/579	332/29008	4.00426e-06	0.000341881	0.000239674	Eya1/Frs2/Fzd3/Gata2/Gata3/Hoxa9/Hoxb6/Kdm2a/Mef2c/Mfap2/Mib1/Mycn/Ndst1/Nphp3/Pkd2/Rest/Runx2/Ryr2/Smad3/Vangl2/Wdr19	21
Up-regualted	GO:0007517	muscle organ development	21/579	360/29008	1.37754e-05	0.000831898	0.000583198	Angpt1/Bcl2/Bcl9/Egr1/Foxk1/Foxp1/Hdac9/Hlf/Lama5/Mef2c/Mybpc3/Nr4a1/P2rx2/Plec/Ryr2/Ski/Smad3/Svil/Vangl2/Zfhx3/Zfp609	21
Up-regualted	GO:0046486	glycerolipid metabolic process	21/579	377/29008	2.72789e-05	0.00132436	0.000928439	Agpat2/Chka/Dgat1/Dgkk/Etnk1/Inpp1/Inpp5d/Itpkc/Lclat1/Mecp2/Mtmr12/Pign/Pik3c2a/Pik3c2g/Pik3cg/Pikfyve/Plcb2/Plcg2/Sik1/Smg1/Socs3	21
Up-regualted	GO:1901214	regulation of neuron death	21/579	384/29008	3.56642e-05	0.00152082	0.00106616	Abl1/Angpt1/Bcl2/Braf/Cd34/Clcf1/Dkk1/Egr1/Fgfr3/Gata3/Itpr1/Jun/Map3k12/Mapk8/Mecp2/Mef2c/Ppargc1a/Rest/Stat3/Tert/Tnfrsf1b	21
Up-regualted	GO:0042326	negative regulation of phosphorylation	21/579	396/29008	5.55201e-05	0.00196382	0.00137673	Abl1/Angpt1/Cblb/Cdkn1a/Dkk1/Irf1/Jun/Lilrb4b/Lrrk1/Pde4d/Pik3ip1/Pkn1/Plec/Ppargc1a/Ptprc/Rassf2/Slit2/Socs3/Spry1/Stap1/Stat3	21
Up-regualted	GO:0030900	forebrain development	21/579	400/29008	6.40539e-05	0.00216493	0.00151772	Atrx/Disc1/Dkk1/Efhc1/Fgfr3/Frs2/Gata2/Hook3/Lmx1a/Mecom/Mrtfa/Ndst1/Numbl/Prkg1/Shank3/Ski/Slit2/Sun2/Syne2/Tox/Ttc8	21
Up-regualted	GO:0031331	positive regulation of cellular catabolic process	21/579	425/29008	0.000149199	0.00369814	0.00259256	Abcd2/Disc1/Dtx3l/Fyco1/Gck/Mapk8/Pik3c2a/Pim2/Pum1/Rc3h2/Rnf180/Samd4b/Sesn3/Tmtc3/Tnfrsf1b/Trim68/Vgll4/Zc3h12d/Zer1/Zfp36/Zyg11b	21
Up-regualted	GO:0009314	response to radiation	21/579	430/29008	0.000175037	0.00409514	0.00287088	Bcl2/Braf/Cacna2d4/Cdkn1a/Cirbp/Clock/Crtc1/Egr1/Eya1/Gata3/Jun/Lrrn4/Mapk8/Mecp2/Pde1b/Per1/Ptprc/Rbm4b/Ric8a/Sik1/Uvssa	21
Up-regualted	GO:0016055	Wnt signaling pathway	21/579	449/29008	0.000312796	0.00619574	0.0043435	Abl1/Bcl9/Csnk1g1/Disc1/Dkk1/Eda/Egr1/Fgfr3/Fzd3/Gata3/Lmbr1l/Lmx1a/Lrrk1/Nphp3/Pkd2/Smad3/Tert/Ubac2/Vangl2/Vgll4/Wls	21
Up-regualted	GO:0050767	regulation of neurogenesis	21/579	451/29008	0.000331733	0.00646749	0.00453401	Arhgef2/Bmpr2/Braf/Clcf1/Cux1/Disc1/Etv5/Fgfr3/Fzd3/Hook3/Mapk8/Mecp2/Mycn/Numbl/Rest/Shank3/Ski/Slit2/Tenm4/Tert/Tnfrsf1b	21
Up-regualted	GO:0198738	cell-cell signaling by wnt	21/579	451/29008	0.000331733	0.00646749	0.00453401	Abl1/Bcl9/Csnk1g1/Disc1/Dkk1/Eda/Egr1/Fgfr3/Fzd3/Gata3/Lmbr1l/Lmx1a/Lrrk1/Nphp3/Pkd2/Smad3/Tert/Ubac2/Vangl2/Vgll4/Wls	21
Up-regualted	GO:0050808	synapse organization	21/579	489/29008	0.000938242	0.0128883	0.0090353	Abi2/Abl1/Adgrl1/Disc1/Dkk1/Dlg4/Erc1/Etv5/Igsf9/Lmx1a/Mecp2/Mef2c/Nlgn2/Ntng2/P2rx2/Pcdhgc5/Ppp1r9a/Rest/Shank3/Tnc/Utrn	21
Up-regualted	GO:0046777	protein autophosphorylation	20/579	237/29008	7.39055e-08	2.28737e-05	1.60355e-05	Abl1/Acvr1b/Camk2d/Camkk2/Csnk1g1/Fgfr3/Iqgap1/Jun/Map3k12/Map3k9/Mob1b/Pikfyve/Pim2/Ptprc/Rassf2/Sik1/Smg1/Stk17b/Stk26/Taok1	20
Up-regualted	GO:0030217	T cell differentiation	20/579	299/29008	2.9277e-06	0.000278808	0.000195457	Abl1/Bcl2/Braf/Clec4e/Dock2/Egr1/Foxp1/Gata3/Il1rl2/Irf1/Lilrb4b/Lmbr1l/Nfkbid/Ptprc/Rc3h2/Runx2/Stat3/Tox/Zfp608/Zfp609	20
Up-regualted	GO:0051146	striated muscle cell differentiation	20/579	320/29008	8.07378e-06	0.00057944	0.000406214	Akap13/Alpk3/Bcl2/Bcl9/Camk2d/Col14a1/Dkk1/Foxp1/Frs2/Hdac9/Kdm6b/Mef2c/Mybpc3/Neb/Nox4/P2rx2/Plec/Sik1/Ski/Tmod3	20
Up-regualted	GO:0018108	peptidyl-tyrosine phosphorylation	20/579	322/29008	8.84867e-06	0.00062598	0.000438841	Abi2/Abl1/Angpt1/Arhgef2/Btc/Cblb/Clcf1/Dlg4/Fgfr3/Il12rb2/Iqgap1/Irf1/Lilrb4b/Lrrk1/Nox4/Plcg2/Ptprc/Rictor/Socs3/Stap1	20
Up-regualted	GO:0018212	peptidyl-tyrosine modification	20/579	325/29008	1.01371e-05	0.000678366	0.000475566	Abi2/Abl1/Angpt1/Arhgef2/Btc/Cblb/Clcf1/Dlg4/Fgfr3/Il12rb2/Iqgap1/Irf1/Lilrb4b/Lrrk1/Nox4/Plcg2/Ptprc/Rictor/Socs3/Stap1	20
Up-regualted	GO:0006644	phospholipid metabolic process	20/579	360/29008	4.3698e-05	0.00175929	0.00123334	Agpat2/Chka/Etnk1/Inpp1/Inpp5d/Itpkc/Lclat1/Lyst/Mecp2/Mtmr12/Pign/Pik3c2a/Pik3c2g/Pik3cg/Pikfyve/Plcb2/Plcg2/Plppr3/Smg1/Socs3	20
Up-regualted	GO:0048872	homeostasis of number of cells	20/579	363/29008	4.90425e-05	0.00181586	0.001273	Abl1/Acvr1b/Bcl2/Col14a1/Gata2/Gata3/Gcnt4/Hoxb6/Inpp5d/Map7/Mecom/Mef2c/P2ry14/Pkn1/Rassf2/Rc3h2/Smad5/Stat3/Tmod3/Zfp36	20
Up-regualted	GO:0003002	regionalization	20/579	379/29008	8.86275e-05	0.00264861	0.0018568	Acvr2b/Bmpr2/Dkk1/Frs2/Gdf11/Gpr161/Hoxa10/Hoxa9/Hoxb6/Mapk8/Mef2c/Mib1/Pbx1/Ski/Smad3/Spry1/Tasor/Vangl2/Wdr19/Wls	20
Up-regualted	GO:0051480	regulation of cytosolic calcium ion concentration	20/579	386/29008	0.000113455	0.00308705	0.00216416	Abl1/Bcl2/Camk2d/Dlg4/Gata2/Gck/Gna13/Itgav/Itpr1/Lhcgr/P2rx2/P2ry10b/Pde4d/Pik3cg/Pkd2/Plcg2/Ptprc/Ramp3/Ryr2/Smad3	20
Up-regualted	GO:0051098	regulation of binding	20/579	397/29008	0.000164961	0.0039311	0.00275588	Abl1/Angpt1/Atp2a3/Cblb/Cdkn1a/Disc1/Dkk1/Dtx3l/Gata3/Hip1r/Jun/Mapk8/Mecp2/Nphp3/Pim2/Plaur/Rest/Ski/Smad3/Tert	20
Up-regualted	GO:0002697	regulation of immune effector process	20/579	424/29008	0.000386973	0.00723128	0.00506946	Angpt1/Arid5a/Clcf1/Clnk/Dnase1/Foxp1/Gata2/Gata3/Il18rap/Irf1/Lilrb4b/Nfkbid/Parp3/Pglyrp2/Pkn1/Plcg2/Ptprc/Rc3h2/Stap1/Tnfrsf1b	20
Up-regualted	GO:0006816	calcium ion transport	20/579	434/29008	0.000519139	0.00871449	0.00610926	Abl1/Atp2a3/Bcl2/Cacna2d4/Camk2d/Gck/Gem/Itgav/Itpr1/Lhcgr/Orai2/Pde4d/Pik3cg/Pkd2/Plcg2/Ptprc/Ramp3/Ryr2/Sestd1/Vdr	20
Up-regualted	GO:0001558	regulation of cell growth	20/579	450/29008	0.000812096	0.0117933	0.00826761	Abl1/Acvr1b/Bcl2/Bmpr2/Cdkn1a/Cirbp/Col14a1/Csf2rb/Disc1/Fhl4/Foxk1/Foxp1/Gdf2/Lmx1a/Mecp2/Reg2/Slit2/Smad3/Vgll4/Zc3h12d	20
Up-regualted	GO:0007409	axonogenesis	20/579	487/29008	0.00207428	0.0216683	0.0151905	Abl1/Bcl2/Bmpr2/Braf/Disc1/Dst/Fgfr3/Foxp1/Fzd3/Gata3/Lama5/Lmx1a/Mef2c/Mycbp2/Ntng2/Numbl/Slit2/Ttc8/Vangl2/Zdhhc17	20
Up-regualted	GO:0061138	morphogenesis of a branching epithelium	19/579	226/29008	1.65719e-07	3.568e-05	2.50133e-05	Abl1/Angpt1/Bcl2/Etv5/Eya1/Frs2/Gdf2/Gna13/Kdm5b/Lama5/Mycn/Pbx1/Slit2/Socs3/Spry1/Tmtc3/Tnc/Vangl2/Vdr	19
Up-regualted	GO:0045664	regulation of neuron differentiation	19/579	241/29008	4.47933e-07	8.21543e-05	5.75939e-05	Arhgef2/Atn1/Bcl2/Dkk1/Dnmt3b/Etv5/Eya1/Gata2/Gdf11/Hmg20a/Lmx1a/Mapk8/Mef2c/Meis1/Mib1/Mycn/Pbx1/Rest/Zfhx3	19
Up-regualted	GO:0033002	muscle cell proliferation	19/579	255/29008	1.05439e-06	0.000153532	0.000107633	Angpt1/Bmpr2/Camk2d/Cdkn1a/Egr1/Foxp1/Frs2/Gna13/Jun/Mef2c/Meis1/Pde4d/Ppargc1a/Prkg1/Six5/Stat3/Tenm4/Tert/Vgll4	19
Up-regualted	GO:0048738	cardiac muscle tissue development	19/579	269/29008	2.33371e-06	0.000240761	0.000168785	Akap13/Alpk3/Angpt1/Camk2d/Col14a1/Dkk1/Foxp1/Frs2/Kdm6b/Mef2c/Meis1/Mybpc3/Neb/Nox4/Plec/Ryr2/Sik1/Tenm4/Vgll4	19
Up-regualted	GO:0048511	rhythmic process	19/579	307/29008	1.55141e-05	0.000883056	0.000619062	Clock/Crtc1/Egr1/Hlf/Huwe1/Kdm2a/Kdm5b/Lhcgr/Mapk8/Mycbp2/Ncoa2/Nr0b2/Nrip1/Per1/Ppargc1a/Rbm4b/Setx/Sik1/Zfhx3	19
Up-regualted	GO:0051271	negative regulation of cellular component movement	19/579	315/29008	2.21614e-05	0.00114316	0.000801408	Bcl2/Braf/Gata3/Gdf2/Gna13/Mctp1/Mecp2/Mef2c/Nav3/Ppargc1a/Prkg1/Scai/Slit2/Srgap3/Stap1/Stat3/Stk26/Tmod3/Vash1	19
Up-regualted	GO:0002366	leukocyte activation involved in immune response	19/579	324/29008	3.25929e-05	0.00149444	0.00104767	Abl1/Cdh17/Clcf1/Clec4e/Clnk/Dnase1/Dock2/Foxp1/Gata2/Gata3/Irf1/Nfkbid/Parp3/Pglyrp2/Plcg2/Ptprc/Rc3h2/Sbno2/Stat3	19
Up-regualted	GO:0002263	cell activation involved in immune response	19/579	328/29008	3.84947e-05	0.0016019	0.001123	Abl1/Cdh17/Clcf1/Clec4e/Clnk/Dnase1/Dock2/Foxp1/Gata2/Gata3/Irf1/Nfkbid/Parp3/Pglyrp2/Plcg2/Ptprc/Rc3h2/Sbno2/Stat3	19
Up-regualted	GO:0046651	lymphocyte proliferation	19/579	330/29008	4.17882e-05	0.00172446	0.00120893	Abl1/Bcl2/Cblb/Cd274/Cdkn1a/Clcf1/Dock2/Elf4/Inpp5d/Irf1/Lilrb4b/Lmbr1l/Mef2c/Pkn1/Ptprc/Rasal3/Rc3h2/Tnfrsf1b/Zc3h12d	19
Up-regualted	GO:0032943	mononuclear cell proliferation	19/579	334/29008	4.91368e-05	0.00181586	0.001273	Abl1/Bcl2/Cblb/Cd274/Cdkn1a/Clcf1/Dock2/Elf4/Inpp5d/Irf1/Lilrb4b/Lmbr1l/Mef2c/Pkn1/Ptprc/Rasal3/Rc3h2/Tnfrsf1b/Zc3h12d	19
Up-regualted	GO:0070661	leukocyte proliferation	19/579	358/29008	0.000122579	0.00326351	0.00228787	Abl1/Bcl2/Cblb/Cd274/Cdkn1a/Clcf1/Dock2/Elf4/Inpp5d/Irf1/Lilrb4b/Lmbr1l/Mef2c/Pkn1/Ptprc/Rasal3/Rc3h2/Tnfrsf1b/Zc3h12d	19
Up-regualted	GO:1901987	regulation of cell cycle phase transition	19/579	378/29008	0.000245099	0.00512123	0.00359022	Bcl2/Camk2d/Cdc14a/Cdkn1a/Cirbp/Clock/Fhl4/Gpr132/Klhl18/Mecp2/Pbx1/Pkd2/Plcg2/Stxbp4/Taok1/Tert/Tmod3/Trrap/Zc3h12d	19
Up-regualted	GO:0034329	cell junction assembly	19/579	439/29008	0.00147335	0.0170583	0.0119587	Abi2/Abl1/Adgrl1/Bcl2/Dkk1/Dst/Iqgap1/Itgav/Marveld2/Mecp2/Mef2c/Nlgn2/Ntng2/Plec/Ppp1r9a/Shank3/Smad3/Tesk2/Tln1	19
Up-regualted	GO:0022407	regulation of cell-cell adhesion	19/579	457/29008	0.00231432	0.0231895	0.0162569	Abl1/Cblb/Cd274/Gata3/Il1rl2/Irf1/Lilrb4b/Nfat5/Nfkbid/Pde4d/Plaur/Prkg1/Ptprc/Rasal3/Rc3h2/Selp/Zc3h12d/Zfp608/Zfp609	19
Up-regualted	GO:0042391	regulation of membrane potential	19/579	465/29008	0.00280097	0.0260721	0.0182778	Bcl2/Camk2d/Chrnb4/Crtc1/Dlg4/Fhl4/Foxp1/Hsh2d/Jun/Kcnh2/Kcnj2/Mecp2/Mef2c/Nlgn2/P2rx2/Ppp1r9a/Ryr2/Shank3/Slc25a27	19
Up-regualted	GO:0002460	adaptive immune response based on somatic recombination of immune receptors built from immunoglobulin superfamily domains	19/579	480/29008	0.00394501	0.0322371	0.0225997	Arid5a/Bach2/Cd274/Clcf1/Gata3/Il18rap/Inpp5d/Irf1/Lilrb4b/Lyst/Mef2c/Nfkbid/Parp3/Pkn1/Pou2f2/Ptprc/Rc3h2/Stat3/Tnfrsf1b	19
Up-regualted	GO:0022412	cellular process involved in reproduction in multicellular organism	19/579	495/29008	0.00545211	0.0392996	0.0275509	Acrbp/Aff4/Bcl2/Brdt/Cfap69/Ddx4/Diaph2/Dnmt3a/Etv5/Fndc3a/Kmt2d/Map7/Mei4/Ropn1l/Six5/Smad5/Spag6l/Stag3/Tdrd1	19
Up-regualted	GO:0007369	gastrulation	18/579	178/29008	2.09465e-08	1.15642e-05	8.10706e-06	Acvr2b/Bmpr2/Dkk1/Dusp2/Dusp4/Dusp5/Exoc4/Eya1/Frs2/Itgav/Kdm6b/Nphp3/Ric8a/Smad3/Tasor/Tenm4/Vangl2/Wls	18
Up-regualted	GO:0046631	alpha-beta T cell activation	18/579	180/29008	2.494e-08	1.2012e-05	8.42096e-06	Abl1/Bcl2/Braf/Cblb/Cd274/Dock2/Elf4/Foxp1/Gata3/Irf1/Lilrb4b/Nfkbid/Ptprc/Rasal3/Rc3h2/Stat3/Tox/Wdfy4	18
Up-regualted	GO:0010632	regulation of epithelial cell migration	18/579	241/29008	1.95004e-06	0.000214591	0.000150438	Abl1/Angpt1/Bmpr2/Epb41l4b/Foxp1/Gata2/Gata3/Gdf2/Hdac9/Jun/Mecp2/Mef2c/Pik3c2a/Pik3cg/Plcg2/Rreb1/Slit2/Vash1	18
Up-regualted	GO:0050730	regulation of peptidyl-tyrosine phosphorylation	18/579	266/29008	7.75251e-06	0.000564565	0.000395786	Abl1/Angpt1/Arhgef2/Btc/Cblb/Clcf1/Dlg4/Fgfr3/Iqgap1/Irf1/Lilrb4b/Lrrk1/Nox4/Plcg2/Ptprc/Rictor/Socs3/Stap1	18
Up-regualted	GO:0060541	respiratory system development	18/579	266/29008	7.75251e-06	0.000564565	0.000395786	Acvr2b/Bmpr2/Cux1/Eda/Eya1/Fgfr3/Foxp1/Lama5/Mycn/Nphp3/Pou2f1/Rc3h2/Ski/Spry1/Tmtc3/Tnc/Vangl2/Zfp157	18
Up-regualted	GO:0006650	glycerophospholipid metabolic process	18/579	273/29008	1.10517e-05	0.000710752	0.00049827	Agpat2/Chka/Etnk1/Inpp1/Inpp5d/Itpkc/Lclat1/Mecp2/Mtmr12/Pign/Pik3c2a/Pik3c2g/Pik3cg/Pikfyve/Plcb2/Plcg2/Smg1/Socs3	18
Up-regualted	GO:2000146	negative regulation of cell motility	18/579	306/29008	5.01449e-05	0.00183939	0.0012895	Bcl2/Braf/Gata3/Gdf2/Gna13/Mctp1/Mecp2/Mef2c/Nav3/Ppargc1a/Prkg1/Scai/Slit2/Srgap3/Stap1/Stat3/Stk26/Vash1	18
Up-regualted	GO:0016358	dendrite development	18/579	313/29008	6.7057e-05	0.00219911	0.00154168	Abi2/Abl1/Crtc1/Cux1/Disc1/Dlg4/Igsf9/Iqgap1/Mapk8/Mecp2/Mef2c/Nlgn2/Numbl/Ppp1r9a/Prkg1/Rere/Shank3/Tet1	18
Up-regualted	GO:0007548	sex differentiation	18/579	317/29008	7.88334e-05	0.00247078	0.00173213	Angpt1/Atn1/Atrx/Bcl2/Dach2/Fndc3a/Gata3/Hoxa10/Hoxa9/Itgav/Lhcgr/Map7/Nrip1/Pbx1/Rhobtb3/Smad5/Tiparp/Wdr19	18
Up-regualted	GO:0090596	sensory organ morphogenesis	18/579	319/29008	8.53789e-05	0.00257803	0.00180731	Abi2/Bcl2/Eya1/Fgfr3/Frs2/Fzd3/Gata2/Gata3/Gdf11/Meis1/Mfap2/Pou2f1/Rest/Ski/Stat3/Ttc8/Vangl2/Wdr19	18
Up-regualted	GO:0040013	negative regulation of locomotion	18/579	341/29008	0.000195875	0.00446993	0.00313363	Bcl2/Braf/Gata3/Gdf2/Gna13/Mctp1/Mecp2/Mef2c/Nav3/Ppargc1a/Prkg1/Scai/Slit2/Srgap3/Stap1/Stat3/Stk26/Vash1	18
Up-regualted	GO:0050727	regulation of inflammatory response	18/579	342/29008	0.000203015	0.00459657	0.00322241	Ash1l/Clcf1/Clock/Dnase1/Foxp1/Gata3/Il1rl2/Pglyrp2/Pik3cg/Plcg2/Rictor/Sbno2/Slit2/Smad3/Socs3/Stap1/Tnfrsf1b/Zfp36	18
Up-regualted	GO:0007204	positive regulation of cytosolic calcium ion concentration	18/579	344/29008	0.00021798	0.00475522	0.00333363	Abl1/Bcl2/Camk2d/Dlg4/Gata2/Gck/Gna13/Itgav/Itpr1/Lhcgr/P2ry10b/Pde4d/Pik3cg/Pkd2/Plcg2/Ptprc/Ramp3/Ryr2	18
Up-regualted	GO:0021700	developmental maturation	18/579	344/29008	0.00021798	0.00475522	0.00333363	Adgrl1/Anks1/Bcl2/Disc1/Dlg4/Farp2/Fgfr3/Gata2/Gata3/Gdf11/Mecp2/Pou2f2/Rere/Rfx3/Ropn1l/Runx2/Snx10/Xylt1	18
Up-regualted	GO:0042063	gliogenesis	18/579	344/29008	0.00021798	0.00475522	0.00333363	Abl1/Clcf1/Disc1/Etv5/Exoc4/Fgfr3/Mecp2/Mycn/Nab2/Plec/Ski/Stap1/Stat3/Sun2/Syne2/Tenm4/Tert/Tnfrsf1b	18
Up-regualted	GO:0016311	dephosphorylation	18/579	345/29008	0.000225817	0.00486194	0.00340844	Acpp/Bcl2/Cdc14a/Dusp2/Dusp4/Dusp5/Eya1/Inpp1/Inpp5d/Iqgap1/Mef2c/Mtmr12/Nron/Plppr3/Ppp1r12a/Ppp6r3/Ptprc/Smad3	18
Up-regualted	GO:0001933	negative regulation of protein phosphorylation	18/579	349/29008	0.000259679	0.00535804	0.00375623	Abl1/Angpt1/Cblb/Cdkn1a/Dkk1/Irf1/Jun/Lilrb4b/Lrrk1/Pde4d/Pkn1/Plec/Ppargc1a/Ptprc/Rassf2/Slit2/Socs3/Spry1	18
Up-regualted	GO:0042060	wound healing	18/579	361/29008	0.000389179	0.00724517	0.00507919	Ccn1/Cd34/Cdkn1a/Dst/Epb41l4b/F9/Gata2/Gna13/Lyst/Mrtfa/Nbeal2/Plec/Prkg1/Procr/Rreb1/Selp/Smad3/Vangl2	18
Up-regualted	GO:0043010	camera-type eye development	18/579	381/29008	0.000730003	0.0110213	0.00772641	Abi2/Acvr2b/Bmpr2/Fgfr3/Frs2/Gata3/Gdf11/Jun/Kmt2c/Meis1/Pds5b/Pou2f1/Six5/Ski/Smad3/Spry1/Ttc8/Wdr19	18
Up-regualted	GO:0007178	transmembrane receptor protein serine/threonine kinase signaling pathway	18/579	387/29008	0.000872592	0.0123813	0.00867986	Abl1/Acvr1b/Acvr2b/Bmpr2/Ccn1/Dkk1/Egr1/Gdf11/Gdf2/Jun/Pbld2/Prdm16/Runx2/Ski/Smad3/Smad5/Spry1/Stat3	18
Up-regualted	GO:0019221	cytokine-mediated signaling pathway	18/579	397/29008	0.00116323	0.0147029	0.0103074	Angpt1/Cd300lf/Csf2rb/Eda/Egr1/Ikbke/Il12rb2/Il18rap/Irf1/Nlrc5/Numbl/Oas1c/Oas3/Ptprc/Slit2/Stap1/Stat3/Traf3	18
Up-regualted	GO:0051090	regulation of DNA-binding transcription factor activity	18/579	425/29008	0.00244816	0.0236783	0.0165996	Arhgef2/Clock/Crtc1/Eda/Ikbke/Il18rap/Nfkbid/Nlrc5/Nr0b2/Nwd1/Pbx1/Pkd2/Plcg2/Ppargc1a/Sik1/Stat3/Traf3/Trim68	18
Up-regualted	GO:0048754	branching morphogenesis of an epithelial tube	17/579	188/29008	2.6249e-07	5.1994e-05	3.64501e-05	Abl1/Angpt1/Bcl2/Etv5/Eya1/Gdf2/Gna13/Kdm5b/Lama5/Mycn/Pbx1/Slit2/Spry1/Tmtc3/Tnc/Vangl2/Vdr	17
Up-regualted	GO:0031032	actomyosin structure organization	17/579	210/29008	1.2464e-06	0.000154304	0.000108174	Abl1/Akap13/Arap1/Braf/Cdc42bpg/Epb41l4b/Foxp1/Mef2c/Mybpc3/Neb/Nox4/Plec/Ppp1r9a/Smad3/Spag6l/Tmod3/Ttc8	17
Up-regualted	GO:0007623	circadian rhythm	17/579	222/29008	2.66925e-06	0.000264362	0.00018533	Clock/Crtc1/Egr1/Huwe1/Kdm2a/Kdm5b/Mapk8/Mycbp2/Ncoa2/Nr0b2/Nrip1/Per1/Ppargc1a/Rbm4b/Setx/Sik1/Zfhx3	17
Up-regualted	GO:0007163	establishment or maintenance of cell polarity	17/579	226/29008	3.39894e-06	0.000311696	0.000218513	Arhgef2/Atn1/Coro7/Dock2/Dst/Exoc4/Eya1/Gata3/Nphp3/Rhobtb3/Rictor/Rnd3/Spag6l/Spry1/Syne2/Ttc8/Vangl2	17
Up-regualted	GO:0002573	myeloid leukocyte differentiation	17/579	238/29008	6.78681e-06	0.000533465	0.000373983	Cd300lf/Farp2/Fgfr3/Foxp1/Gata2/Gata3/Inpp5d/Jun/Junb/Lilrb4b/Lrrk1/Mef2c/Prdm16/Rassf2/Sbno2/Slc9b2/Snx10	17
Up-regualted	GO:0048705	skeletal system morphogenesis	17/579	261/29008	2.25329e-05	0.00115034	0.000806442	Acvr2b/Ankrd11/Eya1/Fgfr3/Hoxa9/Hoxb6/Mef2c/Mycn/Nab2/Ndst1/Runx2/Ski/Smad3/Tiparp/Vdr/Wdr19/Zfp950	17
Up-regualted	GO:0003007	heart morphogenesis	17/579	284/29008	6.49973e-05	0.00217478	0.00152462	Angpt1/Bmpr2/Ccn1/Dkk1/Eya1/Gata3/Jun/Kdm2a/Mef2c/Mib1/Mybpc3/Nphp3/Pkd2/Ryr2/Slit2/Smad3/Vangl2	17
Up-regualted	GO:0030336	negative regulation of cell migration	17/579	293/29008	9.51746e-05	0.00277238	0.00194356	Bcl2/Braf/Gdf2/Gna13/Mctp1/Mecp2/Mef2c/Nav3/Ppargc1a/Prkg1/Scai/Slit2/Srgap3/Stap1/Stat3/Stk26/Vash1	17
Up-regualted	GO:0032409	regulation of transporter activity	17/579	297/29008	0.000112138	0.00308705	0.00216416	Bcl2/Camk2d/Dlg4/Fgf11/Fhl4/Fxyd7/Gem/Klhl24/Mef2c/Nlgn2/Pde4d/Pkd2/Plcg2/Ppargc1a/Ryr2/Shank3/Slc5a3	17
Up-regualted	GO:0019932	second-messenger-mediated signaling	17/579	308/29008	0.000173182	0.00408379	0.00286292	Adgrl1/Camkk2/Exoc4/Gck/Gucy1a1/Itpr1/Ksr2/Lhcgr/Nfat5/Nron/Pde4d/Plcg2/Ppp1r9a/Prkg1/Ptprc/Ryr2/Selp	17
Up-regualted	GO:0030111	regulation of Wnt signaling pathway	17/579	317/29008	0.000242974	0.00512002	0.00358937	Abl1/Csnk1g1/Disc1/Dkk1/Eda/Egr1/Fgfr3/Lmbr1l/Lmx1a/Lrrk1/Nphp3/Smad3/Tert/Ubac2/Vangl2/Vgll4/Wls	17
Up-regualted	GO:0060249	anatomical structure homeostasis	17/579	322/29008	0.000291438	0.00588576	0.00412619	Angpt1/Ankrd11/Bcl2/Cd34/Col14a1/Gata2/Inpp5d/Itgav/Lrrk1/Nox4/Nphp3/Oas1c/P2rx2/Pbld2/Slc28a2/Snx10/Taok1	17
Up-regualted	GO:0050863	regulation of T cell activation	17/579	339/29008	0.000524259	0.00874985	0.00613405	Abl1/Braf/Cblb/Cd274/Gata3/Il1rl2/Irf1/Lilrb4b/Nfkbid/Ptprc/Rasal3/Rc3h2/Tnfrsf1b/Tox/Zc3h12d/Zfp608/Zfp609	17
Up-regualted	GO:0018105	peptidyl-serine phosphorylation	17/579	340/29008	0.000541907	0.00888584	0.00622938	Angpt1/Bcl2/Braf/Camk2d/Csnk1g1/Dkk1/Ikbke/Map3k12/Mapk8/Mast4/Pde4d/Pikfyve/Pkn1/Ramp3/Rassf2/Rictor/Smg1	17
Up-regualted	GO:0070371	ERK1 and ERK2 cascade	17/579	349/29008	0.00072509	0.0109806	0.00769788	Abl1/Angpt1/Braf/Camk2d/Ccn1/Clcf1/Dusp4/Fgfr3/Frs2/Itgav/Jun/Map3k12/Nox4/Ptprc/Ramp3/Spry1/Zdhhc17	17
Up-regualted	GO:0002768	immune response-regulating cell surface receptor signaling pathway	17/579	351/29008	0.000772315	0.011485	0.0080515	Abl1/Bcl2/Braf/Cblb/Cd247/Clec4e/Foxp1/Gata3/Lilrb4b/Mef2c/Nfkbid/Pde4d/Plcg2/Ptprc/Rc3h2/Skint3/Stap1	17
Up-regualted	GO:0032259	methylation	17/579	363/29008	0.00111453	0.0144103	0.0101023	Ash1l/Atf7ip/Atrx/Baz2a/Ddx4/Dnmt3a/Dnmt3b/Gata3/Kcnq1ot1/Kmt2c/Kmt2d/Lcor/Mecom/Mecp2/Prdm16/Tdrd1/Tet1	17
Up-regualted	GO:0018209	peptidyl-serine modification	17/579	365/29008	0.00118253	0.014828	0.0103951	Angpt1/Bcl2/Braf/Camk2d/Csnk1g1/Dkk1/Ikbke/Map3k12/Mapk8/Mast4/Pde4d/Pikfyve/Pkn1/Ramp3/Rassf2/Rictor/Smg1	17
Up-regualted	GO:0031589	cell-substrate adhesion	17/579	366/29008	0.00121784	0.0149646	0.0104909	Abl1/Angpt1/Bcl2/Braf/Ccn1/Cd34/Disc1/Eda/Iqgap1/Itgav/Lama5/Ntng2/Rreb1/Smad3/Spag6l/Tesk2/Utrn	17
Up-regualted	GO:0045786	negative regulation of cell cycle	17/579	367/29008	0.00125403	0.0151832	0.0106442	Abl1/Atrx/Bcl2/Cdkn1a/Clock/Fgfr3/Fhl4/Foxk1/Fzd3/Gata3/Gpr132/Nr4a1/Pkd2/Smad3/Taok1/Trrap/Zc3h12d	17
Up-regualted	GO:0046879	hormone secretion	17/579	367/29008	0.00125403	0.0151832	0.0106442	Acvr2b/Clcf1/Clock/Dgat1/Gata3/Gck/Ildr1/Kdm5b/Nlgn2/Nr0b2/Rest/Rfx3/Slc18a2/Slc9b2/Stxbp4/Vdr/Zbed6	17
Up-regualted	GO:0009914	hormone transport	17/579	375/29008	0.00157777	0.0179199	0.0125627	Acvr2b/Clcf1/Clock/Dgat1/Gata3/Gck/Ildr1/Kdm5b/Nlgn2/Nr0b2/Rest/Rfx3/Slc18a2/Slc9b2/Stxbp4/Vdr/Zbed6	17
Up-regualted	GO:0018205	peptidyl-lysine modification	17/579	375/29008	0.00157777	0.0179199	0.0125627	Arid5a/Ash1l/Atrx/Baz2a/Dnmt3b/Egr1/Eya1/Gata2/Gata3/Hdac9/Hmg20a/Kmt2c/Kmt2d/Lcor/Mecp2/Per1/Trrap	17
Up-regualted	GO:0010720	positive regulation of cell development	17/579	378/29008	0.0017161	0.0191831	0.0134482	Abl1/Bcl2/Bmpr2/Braf/Clcf1/Cux1/Disc1/Etv5/Fzd3/Mapk8/Numbl/Rfx3/Rreb1/Shank3/Slc9b2/Tenm4/Tnfrsf1b	17
Up-regualted	GO:0009991	response to extracellular stimulus	17/579	391/29008	0.00243932	0.0236783	0.0165996	Atn1/Bcl2/Cdkn1a/Foxk1/Gck/Jun/Lct/Mapk8/Pik3c2a/Plec/Ppargc1a/Ptprc/Sesn3/Sik1/Stk26/Vdr/Zfp36	17
Up-regualted	GO:0044772	mitotic cell cycle phase transition	17/579	406/29008	0.0035736	0.0305112	0.0213897	Acvr1b/Bcl2/Camk2d/Ccng2/Cdc14a/Cdkn1a/Fhl4/Gpr132/Klhl18/Mecp2/Pbx1/Pim2/Pkd2/Taok1/Tert/Tmod3/Zc3h12d	17
Up-regualted	GO:0007018	microtubule-based movement	17/579	413/29008	0.00423562	0.0337862	0.0236857	Ash1l/Casc1/Cfap54/Cfap69/Ddx4/Dst/Fyco1/Ift81/Katnip/Mecp2/Rfx3/Ropn1l/Slc9b2/Spag6l/Sun2/Syne2/Wdr19	17
Up-regualted	GO:0009791	post-embryonic development	16/579	134/29008	1.19826e-08	1.15642e-05	8.10706e-06	Abl1/Acvr2b/Ash1l/Atn1/Atrx/Bcl2/Gata3/Itpr1/Kdm5b/Mecom/Mecp2/Rc3h2/Slc18a2/Tiparp/Tmtc3/Zfp950	16
Up-regualted	GO:0035051	cardiocyte differentiation	16/579	186/29008	1.14715e-06	0.000153532	0.000107633	Akap13/Alpk3/Camk2d/Col14a1/Dkk1/Foxp1/Frs2/Kdm6b/Mef2c/Neb/Nox4/Plec/Rest/Sik1/Tenm4/Vangl2	16
Up-regualted	GO:0043542	endothelial cell migration	16/579	221/29008	1.06301e-05	0.000701871	0.000492043	Abl1/Angpt1/Bmpr2/Foxp1/Gata2/Gata3/Gdf2/Hdac9/Itgav/Mecp2/Mef2c/Nr4a1/Pik3c2a/Pik3cg/Slit2/Vash1	16
Up-regualted	GO:0016458	gene silencing	16/579	243/29008	3.41938e-05	0.00152082	0.00106616	Ago1/Atf7ip/Baz2a/Ddx4/Dnmt3a/Dnmt3b/Helz/Kcnq1ot1/Mecp2/Pum1/Stat3/Tasor/Tdrd1/Tert/Tet1/Zfp36	16
Up-regualted	GO:0060348	bone development	16/579	243/29008	3.41938e-05	0.00152082	0.00106616	Akap13/Ankrd11/Fgfr3/Foxp1/Lrrk1/Mef2c/Meis1/Nab2/Nbeal2/Ptprc/Runx2/Ski/Slc9b2/Smad5/Snx10/Xylt1	16
Up-regualted	GO:0045137	development of primary sexual characteristics	16/579	244/29008	3.59321e-05	0.00152082	0.00106616	Angpt1/Atn1/Atrx/Bcl2/Dach2/Fndc3a/Gata3/Hoxa10/Hoxa9/Itgav/Lhcgr/Map7/Nrip1/Rhobtb3/Tiparp/Wdr19	16
Up-regualted	GO:0045926	negative regulation of growth	16/579	266/29008	9.99297e-05	0.00287704	0.00201694	Acvr1b/Bcl2/Bmpr2/Cdkn1a/Cirbp/Fgfr3/Fhl4/Foxk1/Foxp1/Gdf2/Mecp2/Meis1/Slit2/Smad3/Vgll4/Zc3h12d	16
Up-regualted	GO:0007626	locomotory behavior	16/579	268/29008	0.000109007	0.00304974	0.00213801	Astn1/Chrnb4/Dlg4/Egr1/Etv5/Lmx1a/Mecp2/Meis1/Nav2/Ncoa2/Nlgn2/Pde1b/Pum1/Shank3/Slc18a2/Zfhx3	16
Up-regualted	GO:0022898	regulation of transmembrane transporter activity	16/579	283/29008	0.000203281	0.00459657	0.00322241	Bcl2/Camk2d/Dlg4/Fgf11/Fhl4/Fxyd7/Gem/Klhl24/Mef2c/Nlgn2/Pde4d/Pkd2/Plcg2/Ppargc1a/Ryr2/Shank3	16
Up-regualted	GO:0045165	cell fate commitment	16/579	288/29008	0.000247541	0.00515051	0.00361074	Arhgef2/Bcl2/Braf/Dkk1/Eya1/Fgfr3/Gata2/Gata3/Kdm6b/Mef2c/Runx2/Smad5/Stat3/Tenm4/Tox/Zfp157	16
Up-regualted	GO:0010038	response to metal ion	16/579	292/29008	0.000288737	0.00588576	0.00412619	Bcl2/Braf/Dlg4/Fosb/Fus/Iqgap1/Jun/Junb/Lct/Mapk8/Mecp2/Mef2c/Pgam2/Pkd2/Plcg2/Ryr2	16
Up-regualted	GO:0070588	calcium ion transmembrane transport	16/579	296/29008	0.000335733	0.00651981	0.00457068	Abl1/Atp2a3/Cacna2d4/Camk2d/Gem/Itgav/Itpr1/Lhcgr/Pde4d/Pik3cg/Pkd2/Plcg2/Ptprc/Ramp3/Ryr2/Sestd1	16
Up-regualted	GO:0060070	canonical Wnt signaling pathway	16/579	303/29008	0.000433947	0.00777397	0.00544991	Bcl9/Csnk1g1/Disc1/Dkk1/Eda/Egr1/Fgfr3/Fzd3/Gata3/Lmbr1l/Lmx1a/Lrrk1/Nphp3/Smad3/Ubac2/Wls	16
Up-regualted	GO:0050851	antigen receptor-mediated signaling pathway	16/579	304/29008	0.000449818	0.00793923	0.00556576	Abl1/Bcl2/Braf/Cblb/Cd247/Foxp1/Gata3/Lilrb4b/Mef2c/Nfkbid/Pde4d/Plcg2/Ptprc/Rc3h2/Skint3/Stap1	16
Up-regualted	GO:0051402	neuron apoptotic process	16/579	309/29008	0.000536875	0.00888098	0.00622597	Abl1/Angpt1/Atn1/Bcl2/Braf/Clcf1/Egr1/Fgfr3/Gata3/Jun/Map3k12/Mapk8/Mecp2/Mef2c/Ppargc1a/Tert	16
Up-regualted	GO:0006936	muscle contraction	16/579	312/29008	0.000595746	0.00942534	0.0066076	Camk2d/Ccdc78/Chrnb4/Dock4/Gucy1a1/Kcnh2/Kcnj2/Mybpc3/Nr4a1/P2rx2/Pde4d/Pgam2/Prkg1/Ryr2/Smad5/Tmod3	16
Up-regualted	GO:0070372	regulation of ERK1 and ERK2 cascade	16/579	326/29008	0.000949091	0.0128883	0.0090353	Abl1/Angpt1/Braf/Camk2d/Ccn1/Clcf1/Dusp4/Fgfr3/Frs2/Jun/Map3k12/Nox4/Ptprc/Ramp3/Spry1/Zdhhc17	16
Up-regualted	GO:0008544	epidermis development	16/579	333/29008	0.00118405	0.014828	0.0103951	Acvr1b/Bcl2/Cux1/Dkk1/Eda/Fosl2/Fzd3/Lama5/Mycn/Nab2/Plec/Rest/Svep1/Vangl2/Vdr/Zfp36	16
Up-regualted	GO:0062197	cellular response to chemical stress	16/579	333/29008	0.00118405	0.014828	0.0103951	Abl1/Bcl2/Chd6/Etv5/Foxp1/Jun/Kdm6b/Mapk8/Msra/Pkd2/Plec/Ppargc1a/Rest/Setx/Slc12a6/Stk26	16
Up-regualted	GO:0002429	immune response-activating cell surface receptor signaling pathway	16/579	340/29008	0.00146641	0.0170583	0.0119587	Abl1/Bcl2/Braf/Cblb/Cd247/Foxp1/Gata3/Lilrb4b/Mef2c/Nfkbid/Pde4d/Plcg2/Ptprc/Rc3h2/Skint3/Stap1	16
Up-regualted	GO:0002757	immune response-activating signal transduction	16/579	341/29008	0.00151103	0.0173607	0.0121707	Abl1/Bcl2/Braf/Cblb/Cd247/Foxp1/Gata3/Lilrb4b/Mef2c/Nfkbid/Pde4d/Plcg2/Ptprc/Rc3h2/Skint3/Stap1	16
Up-regualted	GO:0050890	cognition	16/579	354/29008	0.00220303	0.0223096	0.0156401	Abi2/Abl1/Braf/Crtc1/Dkk1/Egr1/Jun/Lhcgr/Lmx1a/Lrrn4/Mecp2/Mef2c/Pde1b/Pde4d/Ric8a/Shank3	16
Up-regualted	GO:0031667	response to nutrient levels	16/579	358/29008	0.00246279	0.0236898	0.0166077	Atn1/Bcl2/Cdkn1a/Foxk1/Gck/Jun/Lct/Mapk8/Pik3c2a/Plec/Ppargc1a/Sesn3/Sik1/Stk26/Vdr/Zfp36	16
Up-regualted	GO:0010639	negative regulation of organelle organization	16/579	364/29008	0.00289983	0.026791	0.0187817	Arap1/Arhgef2/Atrx/Fgfr3/Hdgfl3/Hip1r/Huwe1/Nav3/Ppargc1a/Ppp1r9a/Shank3/Slit2/Smg6/Svil/Taok1/Tmod3	16
Up-regualted	GO:0044782	cilium organization	16/579	375/29008	0.00386767	0.0317097	0.02223	Cdc14a/Cfap54/Cfap69/Disc1/Ift81/Lama5/Nphp3/Pkd2/Rfx3/Snx10/Spag6l/Syne1/Syne2/Ttc8/Vangl2/Wdr19	16
Up-regualted	GO:0019216	regulation of lipid metabolic process	16/579	379/29008	0.0042795	0.0337862	0.0236857	Abcb11/Abcd2/Asxl3/Ccn1/Dgat1/Egr1/Fgfr3/H6pd/Lhcgr/Pik3cg/Pik3ip1/Plcg2/Ppargc1a/Rest/Rubcnl/Sik1	16
Up-regualted	GO:0048638	regulation of developmental growth	16/579	406/29008	0.00809357	0.0488236	0.0342276	Abl1/Bcl2/Bmpr2/Cdkn1a/Col14a1/Disc1/Fgfr3/Foxp1/Mbd5/Mecp2/Mef2c/Meis1/Reg2/Slit2/Stat3/Vgll4	16
Up-regualted	GO:0006979	response to oxidative stress	16/579	407/29008	0.00827489	0.0495493	0.0347363	Abl1/Bcl2/Chd6/Dgkk/Etv5/Foxp1/Jun/Kdm6b/Mapk8/Mctp1/Msra/Ppargc1a/Rest/Sesn3/Setx/Stk26	16
Up-regualted	GO:0050679	positive regulation of epithelial cell proliferation	15/579	215/29008	3.07082e-05	0.00144826	0.0010153	Bmpr2/Eya1/Fgfr3/Foxp1/Gata2/Gdf2/Itpr1/Jun/Kdm5b/Nr4a1/Reg2/Rictor/Rreb1/Stat3/Stxbp4	15
Up-regualted	GO:0045637	regulation of myeloid cell differentiation	15/579	219/29008	3.80017e-05	0.00159479	0.00111802	Acvr1b/Fgfr3/Foxp1/Gata2/Hoxa9/Inpp5d/Jun/Lilrb4b/Mef2c/Meis1/Prdm16/Rassf2/Slc9b2/Stat3/Zfp36	15
Up-regualted	GO:0055001	muscle cell development	15/579	221/29008	4.21896e-05	0.00172664	0.00121045	Akap13/Alpk3/Bcl2/Camk2d/Col14a1/Foxp1/Hdac9/Mef2c/Mybpc3/Neb/P2rx2/Plec/Ski/Tmod3/Tmtc3	15
Up-regualted	GO:0050866	negative regulation of cell activation	15/579	223/29008	4.67779e-05	0.00179569	0.00125886	Cblb/Cd274/Cd300lf/Clnk/Inpp5d/Irf1/Lilrb4b/Nfkbid/Parp3/Pglyrp2/Pkn1/Prkg1/Rc3h2/Zc3h12d/Zfp608	15
Up-regualted	GO:0007249	I-kappaB kinase/NF-kappaB signaling	15/579	228/29008	6.02164e-05	0.00207078	0.00145171	Abl1/Akap13/Angpt1/Ash1l/Eda/Erc1/Irf1/Lilrb4b/Mapkbp1/Nfkbid/Per1/Pim2/Plcg2/Traf3/Trim68	15
Up-regualted	GO:0009952	anterior/posterior pattern specification	15/579	232/29008	7.32918e-05	0.00232655	0.00163102	Acvr2b/Bmpr2/Dkk1/Frs2/Gdf11/Hoxa10/Hoxa9/Hoxb6/Mib1/Pbx1/Ski/Smad3/Tasor/Vangl2/Wls	15
Up-regualted	GO:0030324	lung development	15/579	233/29008	7.6925e-05	0.00242632	0.00170096	Acvr2b/Bmpr2/Cux1/Eya1/Fgfr3/Foxp1/Lama5/Mycn/Nphp3/Rc3h2/Spry1/Tmtc3/Tnc/Vangl2/Zfp157	15
Up-regualted	GO:0030323	respiratory tube development	15/579	236/29008	8.87862e-05	0.00264861	0.0018568	Acvr2b/Bmpr2/Cux1/Eya1/Fgfr3/Foxp1/Lama5/Mycn/Nphp3/Rc3h2/Spry1/Tmtc3/Tnc/Vangl2/Zfp157	15
Up-regualted	GO:0008406	gonad development	15/579	240/29008	0.000107067	0.00301248	0.00211189	Angpt1/Atn1/Atrx/Bcl2/Fndc3a/Gata3/Hoxa10/Hoxa9/Itgav/Lhcgr/Map7/Nrip1/Rhobtb3/Tiparp/Wdr19	15
Up-regualted	GO:1901215	negative regulation of neuron death	15/579	255/29008	0.000208003	0.00462559	0.00324275	Angpt1/Bcl2/Braf/Cd34/Clcf1/Itpr1/Jun/Map3k12/Mecp2/Mef2c/Ppargc1a/Rest/Stat3/Tert/Tnfrsf1b	15
Up-regualted	GO:0006898	receptor-mediated endocytosis	15/579	265/29008	0.000314041	0.00619574	0.0043435	Angpt1/Arhgap27/Dkk1/Dlg4/Fcho2/Fchsd2/Grk3/Hip1r/Itgav/Lilrb4b/Lmbr1l/Pikfyve/Plcg2/Ramp3/Slc9b2	15
Up-regualted	GO:0032412	regulation of ion transmembrane transporter activity	15/579	273/29008	0.000429617	0.00773622	0.00542345	Camk2d/Dlg4/Fgf11/Fhl4/Fxyd7/Gem/Klhl24/Mef2c/Nlgn2/Pde4d/Pkd2/Plcg2/Ppargc1a/Ryr2/Shank3	15
Up-regualted	GO:0043523	regulation of neuron apoptotic process	15/579	276/29008	0.000481492	0.00833689	0.00584454	Abl1/Angpt1/Bcl2/Braf/Clcf1/Egr1/Fgfr3/Gata3/Jun/Map3k12/Mapk8/Mecp2/Mef2c/Ppargc1a/Tert	15
Up-regualted	GO:0110053	regulation of actin filament organization	15/579	279/29008	0.000538634	0.00888098	0.00622597	Abi2/Abl1/Arap1/Braf/Fchsd2/Hip1r/Nox4/Ppp1r9a/Rictor/Shank3/Slit2/Smad3/Svil/Tmod3/Ttc8	15
Up-regualted	GO:0001894	tissue homeostasis	15/579	280/29008	0.000558925	0.00907474	0.00636181	Angpt1/Ankrd11/Bcl2/Cd34/Col14a1/Gata2/Inpp5d/Itgav/Lrrk1/Nox4/Nphp3/Oas1c/Pbld2/Slc28a2/Snx10	15
Up-regualted	GO:0071695	anatomical structure maturation	15/579	290/29008	0.000800355	0.0116598	0.00817403	Anks1/Bcl2/Farp2/Fgfr3/Gata2/Gata3/Gdf11/Mecp2/Pou2f2/Rere/Rfx3/Ropn1l/Runx2/Snx10/Xylt1	15
Up-regualted	GO:0001818	negative regulation of cytokine production	15/579	292/29008	0.000857991	0.0122443	0.00858381	Abcd2/Angpt1/Cd274/Cd34/Gata3/Hdac9/Inpp5d/Lilrb4b/Mapkbp1/Nav3/Oas1c/Oas3/Pglyrp2/Ptprc/Zfp36	15
Up-regualted	GO:0051258	protein polymerization	15/579	293/29008	0.000888103	0.012494	0.00875886	Abi2/Abl1/Diaph2/Fchsd2/Hdgfl3/Hip1r/Mapk8/Mecp2/Nav3/Ppp1r9a/Rictor/Slain1/Slit2/Svil/Tmod3	15
Up-regualted	GO:0090287	regulation of cellular response to growth factor stimulus	15/579	299/29008	0.0010882	0.014181	0.00994152	Abl1/Angpt1/Bmpr2/Ccn1/Dkk1/Gata3/Gdf2/Pbld2/Prdm16/Runx2/Ski/Slit2/Smad3/Spry1/Zdhhc17	15
Up-regualted	GO:0015833	peptide transport	15/579	314/29008	0.00176057	0.0194173	0.0136124	Acvr2b/Cdh17/Clcf1/Clock/Dgat1/Gck/Ildr1/Nlgn2/Nr0b2/Rest/Rfx3/Slc18a2/Slc9b2/Stxbp4/Zbed6	15
Up-regualted	GO:0043414	macromolecule methylation	15/579	314/29008	0.00176057	0.0194173	0.0136124	Ash1l/Atf7ip/Atrx/Baz2a/Ddx4/Dnmt3a/Dnmt3b/Gata3/Kcnq1ot1/Kmt2c/Kmt2d/Lcor/Mecp2/Tdrd1/Tet1	15
Up-regualted	GO:0007611	learning or memory	15/579	317/29008	0.00192996	0.0206419	0.0144709	Abi2/Abl1/Braf/Crtc1/Dkk1/Egr1/Jun/Lmx1a/Lrrn4/Mecp2/Mef2c/Pde1b/Pde4d/Ric8a/Shank3	15
Up-regualted	GO:0009416	response to light stimulus	15/579	321/29008	0.00217674	0.0223075	0.0156386	Bcl2/Braf/Cacna2d4/Cdkn1a/Cirbp/Crtc1/Lrrn4/Mapk8/Mecp2/Pde1b/Per1/Rbm4b/Ric8a/Sik1/Uvssa	15
Up-regualted	GO:1903037	regulation of leukocyte cell-cell adhesion	15/579	333/29008	0.00307911	0.0279263	0.0195776	Cblb/Cd274/Gata3/Il1rl2/Irf1/Lilrb4b/Nfat5/Nfkbid/Ptprc/Rasal3/Rc3h2/Selp/Zc3h12d/Zfp608/Zfp609	15
Up-regualted	GO:0051235	maintenance of location	15/579	335/29008	0.00325585	0.0286886	0.020112	Abl1/Camk2d/Dgat1/Ikbke/Itgav/Itpr1/Lhcgr/Nrip1/Pde4d/Pkd2/Plcg2/Ptprc/Ryr2/Sun2/Syne1	15
Up-regualted	GO:0002831	regulation of response to biotic stimulus	15/579	337/29008	0.00344085	0.0295305	0.0207022	Cd274/Clnk/Dtx3l/Foxp1/Ikbke/Il18rap/Irf1/Mapkbp1/Nlrc5/Oas1c/Oas3/Plcg2/Pum1/Traf3/Zdhhc1	15
Up-regualted	GO:0022604	regulation of cell morphogenesis	15/579	337/29008	0.00344085	0.0295305	0.0207022	Abl1/Arap1/Braf/Brwd3/Cux1/Dlg4/Gna13/Mecp2/Ntng2/Numbl/Reg2/Rhobtb3/Rnd3/Rreb1/Zmym6	15
Up-regualted	GO:0060271	cilium assembly	15/579	341/29008	0.00383675	0.0315084	0.0220888	Cdc14a/Cfap54/Cfap69/Disc1/Ift81/Lama5/Nphp3/Rfx3/Snx10/Spag6l/Syne1/Syne2/Ttc8/Vangl2/Wdr19	15
Up-regualted	GO:0042886	amide transport	15/579	343/29008	0.00404824	0.0325983	0.0228529	Acvr2b/Cdh17/Clcf1/Clock/Dgat1/Gck/Ildr1/Nlgn2/Nr0b2/Rest/Rfx3/Slc18a2/Slc9b2/Stxbp4/Zbed6	15
Up-regualted	GO:0014909	smooth muscle cell migration	14/579	103/29008	1.83983e-08	1.15642e-05	8.10706e-06	Bcl2/Camk2d/Dock4/Egr1/Gna13/Iqgap1/Mef2c/Nox4/Pde4d/Ppargc1a/Prkg1/Slit2/Tert/Zfp950	14
Up-regualted	GO:0014812	muscle cell migration	14/579	117/29008	9.52295e-08	2.61987e-05	1.83665e-05	Bcl2/Camk2d/Dock4/Egr1/Gna13/Iqgap1/Mef2c/Nox4/Pde4d/Ppargc1a/Prkg1/Slit2/Tert/Zfp950	14
Up-regualted	GO:1904019	epithelial cell apoptotic process	14/579	120/29008	1.31247e-07	3.24969e-05	2.27818e-05	Abl1/Angpt1/Atf7/Bmpr2/Braf/Col18a1/Gata2/Gata3/Mapk8/Pik3cg/Ppargc1a/Ryr2/Tert/Zfp36	14
Up-regualted	GO:0046488	phosphatidylinositol metabolic process	14/579	143/29008	1.14602e-06	0.000153532	0.000107633	Inpp1/Inpp5d/Itpkc/Lclat1/Mtmr12/Pign/Pik3c2a/Pik3c2g/Pik3cg/Pikfyve/Plcb2/Plcg2/Smg1/Socs3	14
Up-regualted	GO:0010594	regulation of endothelial cell migration	14/579	174/29008	1.14725e-05	0.000728359	0.000510613	Abl1/Angpt1/Bmpr2/Foxp1/Gata2/Gata3/Gdf2/Hdac9/Mecp2/Mef2c/Pik3c2a/Pik3cg/Slit2/Vash1	14
Up-regualted	GO:0098727	maintenance of cell number	14/579	176/29008	1.30647e-05	0.000798721	0.00055994	Bcl9/Braf/Fgfr3/Gata2/Hook3/Mapk8/Mecom/Padi4/Prdm16/Rest/Ski/Stat3/Tet1/Vangl2	14
Up-regualted	GO:0050731	positive regulation of peptidyl-tyrosine phosphorylation	14/579	192/29008	3.45754e-05	0.00152082	0.00106616	Abl1/Angpt1/Arhgef2/Btc/Clcf1/Dlg4/Fgfr3/Iqgap1/Lrrk1/Nox4/Plcg2/Ptprc/Rictor/Stap1	14
Up-regualted	GO:0045619	regulation of lymphocyte differentiation	14/579	199/29008	5.11676e-05	0.00186174	0.00130516	Abl1/Braf/Gata3/Il1rl2/Inpp5d/Irf1/Lilrb4b/Nfkbid/Pglyrp2/Ptprc/Rc3h2/Tox/Zfp608/Zfp609	14
Up-regualted	GO:0002695	negative regulation of leukocyte activation	14/579	200/29008	5.40313e-05	0.00192491	0.00134945	Cblb/Cd274/Cd300lf/Clnk/Inpp5d/Irf1/Lilrb4b/Nfkbid/Parp3/Pglyrp2/Pkn1/Rc3h2/Zc3h12d/Zfp608	14
Up-regualted	GO:0030308	negative regulation of cell growth	14/579	202/29008	6.01813e-05	0.00207078	0.00145171	Acvr1b/Bcl2/Bmpr2/Cdkn1a/Cirbp/Fhl4/Foxk1/Foxp1/Gdf2/Mecp2/Slit2/Smad3/Vgll4/Zc3h12d	14
Up-regualted	GO:0045017	glycerolipid biosynthetic process	14/579	208/29008	8.24434e-05	0.00253578	0.0017777	Agpat2/Chka/Dgat1/Etnk1/Inpp1/Itpkc/Pign/Pik3c2a/Pik3c2g/Pik3cg/Plcg2/Sik1/Smg1/Socs3	14
Up-regualted	GO:0043393	regulation of protein binding	14/579	218/29008	0.00013558	0.00347872	0.00243875	Abl1/Angpt1/Atp2a3/Cblb/Cdkn1a/Disc1/Dkk1/Dtx3l/Hip1r/Mapk8/Mecp2/Nphp3/Pim2/Tert	14
Up-regualted	GO:0002285	lymphocyte activation involved in immune response	14/579	219/29008	0.000142244	0.00359384	0.00251945	Abl1/Cdh17/Clcf1/Clec4e/Foxp1/Gata3/Irf1/Nfkbid/Parp3/Pglyrp2/Plcg2/Ptprc/Rc3h2/Stat3	14
Up-regualted	GO:0001649	osteoblast differentiation	14/579	220/29008	0.00014919	0.00369814	0.00259256	Acvr2b/Bmpr2/Ccn1/Gdf2/Junb/Mef2c/Rassf2/Rest/Runx2/Ski/Smad3/Smad5/Suco/Zhx3	14
Up-regualted	GO:0051056	regulation of small GTPase mediated signal transduction	14/579	233/29008	0.000269929	0.00554642	0.0038883	Abl1/Akap13/Arhgef2/Camk2d/Dennd1a/Dennd4c/Dock2/Itgav/P2ry10b/Pik3cg/Rasal3/Scai/Slit2/Spry1	14
Up-regualted	GO:0050670	regulation of lymphocyte proliferation	14/579	241/29008	0.000379894	0.00715299	0.00501458	Bcl2/Cblb/Cd274/Cdkn1a/Clcf1/Inpp5d/Irf1/Lilrb4b/Mef2c/Pkn1/Ptprc/Rasal3/Tnfrsf1b/Zc3h12d	14
Up-regualted	GO:0032944	regulation of mononuclear cell proliferation	14/579	245/29008	0.000447923	0.00793923	0.00556576	Bcl2/Cblb/Cd274/Cdkn1a/Clcf1/Inpp5d/Irf1/Lilrb4b/Mef2c/Pkn1/Ptprc/Rasal3/Tnfrsf1b/Zc3h12d	14
Up-regualted	GO:0070663	regulation of leukocyte proliferation	14/579	261/29008	0.000833551	0.0119993	0.00841203	Bcl2/Cblb/Cd274/Cdkn1a/Clcf1/Inpp5d/Irf1/Lilrb4b/Mef2c/Pkn1/Ptprc/Rasal3/Tnfrsf1b/Zc3h12d	14
Up-regualted	GO:0007568	aging	14/579	262/29008	0.000864901	0.0123074	0.00862808	Abl1/Atn1/Bcl2/Cdkn1a/Dkk1/Gna13/Hdac9/Inpp5d/Msra/Nox4/Pde4d/Slc18a2/Tert/Vash1	14
Up-regualted	GO:0002064	epithelial cell development	14/579	266/29008	0.00100043	0.0134259	0.00941214	Abi2/Atrx/Clock/Col18a1/Fgfr3/Fndc3a/Fosl2/Frs2/Map7/Marveld2/Pde4d/Plec/Rest/Rfx3	14
Up-regualted	GO:0030072	peptide hormone secretion	14/579	285/29008	0.00191282	0.020605	0.014445	Acvr2b/Clcf1/Clock/Dgat1/Gck/Ildr1/Nlgn2/Nr0b2/Rest/Rfx3/Slc18a2/Slc9b2/Stxbp4/Zbed6	14
Up-regualted	GO:0051924	regulation of calcium ion transport	14/579	286/29008	0.0019755	0.0208586	0.0146229	Abl1/Bcl2/Camk2d/Gem/Itpr1/Lhcgr/Pde4d/Pik3cg/Pkd2/Plcg2/Ramp3/Ryr2/Sestd1/Vdr	14
Up-regualted	GO:0044262	cellular carbohydrate metabolic process	14/579	291/29008	0.00231504	0.0231895	0.0162569	Braf/Foxk1/Gck/Inpp1/Itpk1/Lhcgr/Mecp2/Ncoa2/Ndst1/Ppargc1a/Rubcnl/Sik1/Slc5a3/Stat3	14
Up-regualted	GO:0002790	peptide secretion	14/579	293/29008	0.0024637	0.0236898	0.0166077	Acvr2b/Clcf1/Clock/Dgat1/Gck/Ildr1/Nlgn2/Nr0b2/Rest/Rfx3/Slc18a2/Slc9b2/Stxbp4/Zbed6	14
Up-regualted	GO:1901990	regulation of mitotic cell cycle phase transition	14/579	293/29008	0.0024637	0.0236898	0.0166077	Bcl2/Camk2d/Cdc14a/Cdkn1a/Fhl4/Gpr132/Klhl18/Mecp2/Pbx1/Pkd2/Taok1/Tert/Tmod3/Zc3h12d	14
Up-regualted	GO:0009615	response to virus	14/579	312/29008	0.0043087	0.0337862	0.0236857	Bcl2/Dtx3l/Ikbke/Irf1/Lyst/Oas1c/Oas3/Pou2f2/Ptprc/Pum1/Smad3/Traf3/Wdfy4/Zdhhc1	14
Up-regualted	GO:0045787	positive regulation of cell cycle	14/579	336/29008	0.00809455	0.0488236	0.0342276	Abl1/Atrx/Btc/Camk2d/Cdc14a/Klhl18/Mecp2/Pbx1/Pkd2/Plcg2/Stxbp4/Tert/Tmod3/Zbed6	14
Up-regualted	GO:0014910	regulation of smooth muscle cell migration	13/579	94/29008	4.80282e-08	1.69883e-05	1.19096e-05	Bcl2/Camk2d/Dock4/Egr1/Gna13/Iqgap1/Mef2c/Nox4/Pde4d/Ppargc1a/Prkg1/Slit2/Tert	13
Up-regualted	GO:0055007	cardiac muscle cell differentiation	13/579	149/29008	9.8273e-06	0.0006759	0.000473837	Akap13/Alpk3/Camk2d/Col14a1/Dkk1/Foxp1/Frs2/Kdm6b/Mef2c/Neb/Nox4/Plec/Sik1	13
Up-regualted	GO:0010634	positive regulation of epithelial cell migration	13/579	156/29008	1.61228e-05	0.000907271	0.000636039	Abl1/Angpt1/Bmpr2/Epb41l4b/Foxp1/Gata2/Gata3/Hdac9/Jun/Pik3c2a/Pik3cg/Plcg2/Rreb1	13
Up-regualted	GO:0051250	negative regulation of lymphocyte activation	13/579	168/29008	3.53202e-05	0.00152082	0.00106616	Cblb/Cd274/Clnk/Inpp5d/Irf1/Lilrb4b/Nfkbid/Parp3/Pglyrp2/Pkn1/Rc3h2/Zc3h12d/Zfp608	13
Up-regualted	GO:0019827	stem cell population maintenance	13/579	172/29008	4.51274e-05	0.00176105	0.00123457	Bcl9/Braf/Fgfr3/Gata2/Hook3/Mapk8/Padi4/Prdm16/Rest/Ski/Stat3/Tet1/Vangl2	13
Up-regualted	GO:0048660	regulation of smooth muscle cell proliferation	13/579	178/29008	6.4266e-05	0.00216493	0.00151772	Bmpr2/Camk2d/Cdkn1a/Egr1/Foxp1/Frs2/Gna13/Jun/Mef2c/Pde4d/Ppargc1a/Prkg1/Tert	13
Up-regualted	GO:0048659	smooth muscle cell proliferation	13/579	184/29008	9.00884e-05	0.00267136	0.00187275	Bmpr2/Camk2d/Cdkn1a/Egr1/Foxp1/Frs2/Gna13/Jun/Mef2c/Pde4d/Ppargc1a/Prkg1/Tert	13
Up-regualted	GO:0043122	regulation of I-kappaB kinase/NF-kappaB signaling	13/579	190/29008	0.00012444	0.00327781	0.00229789	Abl1/Akap13/Angpt1/Ash1l/Eda/Lilrb4b/Mapkbp1/Nfkbid/Per1/Pim2/Plcg2/Traf3/Trim68	13
Up-regualted	GO:0060401	cytosolic calcium ion transport	13/579	190/29008	0.00012444	0.00327781	0.00229789	Abl1/Atp2a3/Bcl2/Camk2d/Itgav/Itpr1/Lhcgr/Pde4d/Pkd2/Plcg2/Ptprc/Ramp3/Ryr2	13
Up-regualted	GO:0001764	neuron migration	13/579	195/29008	0.00016117	0.00387435	0.0027161	Arhgef2/Astn1/Disc1/Fzd3/Gata2/Gata3/Mapk8/Mef2c/Mrtfa/Ntng2/Prkg1/Stat3/Zfp609	13
Up-regualted	GO:0019722	calcium-mediated signaling	13/579	198/29008	0.000187404	0.0042964	0.00301198	Adgrl1/Camkk2/Exoc4/Itpr1/Ksr2/Lhcgr/Nfat5/Nron/Plcg2/Ppp1r9a/Ptprc/Ryr2/Selp	13
Up-regualted	GO:0001666	response to hypoxia	13/579	214/29008	0.000398014	0.00732701	0.00513657	Bcl2/Camk2d/Cd34/Egr1/Fosl2/Itpr1/Lct/Mecp2/P2rx2/Rest/Ryr2/Smad3/Tert	13
Up-regualted	GO:0044843	cell cycle G1/S phase transition	13/579	216/29008	0.000434853	0.00777397	0.00544991	Acvr1b/Bcl2/Camk2d/Cdkn1a/Cirbp/Fhl4/Gpr132/Pim2/Pkd2/Plcg2/Stxbp4/Tert/Zc3h12d	13
Up-regualted	GO:0008654	phospholipid biosynthetic process	13/579	217/29008	0.000454331	0.00797818	0.00559307	Agpat2/Chka/Etnk1/Inpp1/Itpkc/Lclat1/Pign/Pik3c2a/Pik3c2g/Pik3cg/Plcg2/Smg1/Socs3	13
Up-regualted	GO:0002822	regulation of adaptive immune response based on somatic recombination of immune receptors built from immunoglobulin superfamily domains	13/579	220/29008	0.000517265	0.00871449	0.00610926	Arid5a/Cd274/Clcf1/Gata3/Irf1/Lilrb4b/Mef2c/Nfkbid/Parp3/Pkn1/Ptprc/Rc3h2/Tnfrsf1b	13
Up-regualted	GO:0035264	multicellular organism growth	13/579	220/29008	0.000517265	0.00871449	0.00610926	Ankrd11/Atn1/Atrx/Bcl2/Kdm2a/Kmt2c/Mbd5/Pde4d/Plec/Rc3h2/Stat3/Ttc8/Zfp950	13
Up-regualted	GO:0042098	T cell proliferation	13/579	221/29008	0.000539817	0.00888098	0.00622597	Abl1/Cblb/Cd274/Dock2/Elf4/Irf1/Lilrb4b/Lmbr1l/Ptprc/Rasal3/Rc3h2/Tnfrsf1b/Zc3h12d	13
Up-regualted	GO:0051054	positive regulation of DNA metabolic process	13/579	222/29008	0.000563196	0.0091142	0.00638947	Atrx/Camk2d/Clcf1/Dtx3l/Eya1/Fam168a/Fus/Mecp2/Nox4/Parp3/Ppargc1a/Ptprc/Tox	13
Up-regualted	GO:0051495	positive regulation of cytoskeleton organization	13/579	227/29008	0.000693334	0.0106883	0.00749298	Abi2/Abl1/Braf/Fchsd2/Hip1r/Mapk8/Mecp2/Nav3/Nox4/Rictor/Slain1/Smad3/Stap1	13
Up-regualted	GO:0032271	regulation of protein polymerization	13/579	234/29008	0.00091738	0.0127251	0.00892088	Abi2/Abl1/Fchsd2/Hip1r/Mapk8/Mecp2/Nav3/Ppp1r9a/Rictor/Slain1/Slit2/Svil/Tmod3	13
Up-regualted	GO:0002819	regulation of adaptive immune response	13/579	236/29008	0.00099154	0.0133427	0.00935383	Arid5a/Cd274/Clcf1/Gata3/Irf1/Lilrb4b/Mef2c/Nfkbid/Parp3/Pkn1/Ptprc/Rc3h2/Tnfrsf1b	13
Up-regualted	GO:0071241	cellular response to inorganic substance	13/579	237/29008	0.00103046	0.0135832	0.00952246	Atrx/Braf/Dlg4/Fosb/Fus/Iqgap1/Jun/Junb/Mapk8/Mecp2/Mef2c/Pkd2/Plcg2	13
Up-regualted	GO:0036293	response to decreased oxygen levels	13/579	241/29008	0.00119916	0.0149578	0.0104861	Bcl2/Camk2d/Cd34/Egr1/Fosl2/Itpr1/Lct/Mecp2/P2rx2/Rest/Ryr2/Smad3/Tert	13
Up-regualted	GO:0060828	regulation of canonical Wnt signaling pathway	13/579	247/29008	0.00149495	0.0172564	0.0120975	Csnk1g1/Disc1/Dkk1/Eda/Egr1/Fgfr3/Lmbr1l/Lmx1a/Lrrk1/Nphp3/Smad3/Ubac2/Wls	13
Up-regualted	GO:0043583	ear development	13/579	250/29008	0.00166414	0.0186444	0.0130706	Bcl2/Cux1/Eya1/Fgfr3/Fzd3/Gata2/Gata3/Mycn/Rest/Spag6l/Ttc8/Vangl2/Wdr19	13
Up-regualted	GO:0090092	regulation of transmembrane receptor protein serine/threonine kinase signaling pathway	13/579	253/29008	0.00184889	0.0201667	0.0141378	Abl1/Acvr1b/Acvr2b/Bmpr2/Ccn1/Dkk1/Gdf11/Gdf2/Pbld2/Prdm16/Ski/Smad3/Spry1	13
Up-regualted	GO:0090257	regulation of muscle system process	13/579	255/29008	0.00198122	0.0208744	0.0146339	Camk2d/Chrnb4/Dock4/Foxp1/Gucy1a1/Kcnj2/Mef2c/Nr4a1/Pde4d/Prkg1/Ryr2/Smad3/Tnfrsf1b	13
Up-regualted	GO:0002274	myeloid leukocyte activation	13/579	261/29008	0.00242581	0.0236783	0.0165996	Cd300lf/Clnk/Dnase1/Dock2/Foxp1/Gata2/Il18rap/Jun/Lilrb4b/Muc5b/Plcg2/Sbno2/Stap1	13
Up-regualted	GO:0050807	regulation of synapse organization	13/579	263/29008	0.00259103	0.0246272	0.0172648	Abi2/Abl1/Adgrl1/Disc1/Dkk1/Etv5/Igsf9/Mecp2/Mef2c/Nlgn2/Ntng2/Ppp1r9a/Shank3	13
Up-regualted	GO:0034599	cellular response to oxidative stress	13/579	271/29008	0.00334664	0.028973	0.0203114	Abl1/Bcl2/Chd6/Etv5/Foxp1/Jun/Kdm6b/Mapk8/Msra/Ppargc1a/Rest/Setx/Stk26	13
Up-regualted	GO:0050803	regulation of synapse structure or activity	13/579	271/29008	0.00334664	0.028973	0.0203114	Abi2/Abl1/Adgrl1/Disc1/Dkk1/Etv5/Igsf9/Mecp2/Mef2c/Nlgn2/Ntng2/Ppp1r9a/Shank3	13
Up-regualted	GO:0048588	developmental cell growth	13/579	275/29008	0.00378664	0.0314344	0.0220369	Abl1/Akap13/Bmpr2/Camk2d/Col14a1/Disc1/Foxp1/Iqgap1/Kmt2d/Mecp2/Reg2/Slit2/Spag6l	13
Up-regualted	GO:0060560	developmental growth involved in morphogenesis	13/579	280/29008	0.00440134	0.0338033	0.0236977	Abl1/Bmpr2/Disc1/Iqgap1/Kdm5b/Mecp2/Reg2/Slit2/Spag6l/Spry1/Tmtc3/Tnc/Vangl2	13
Up-regualted	GO:0022409	positive regulation of cell-cell adhesion	13/579	288/29008	0.00554997	0.0393409	0.0275797	Cd274/Gata3/Il1rl2/Irf1/Lilrb4b/Nfat5/Nfkbid/Pde4d/Plaur/Ptprc/Rasal3/Selp/Zfp609	13
Up-regualted	GO:0061448	connective tissue development	13/579	288/29008	0.00554997	0.0393409	0.0275797	Arid5a/Bmpr2/Ccn1/Creb5/Egr1/Fgfr3/Gdf2/Mef2c/Mycn/Ppargc1a/Runx2/Smad3/Smad5	13
Up-regualted	GO:0043588	skin development	13/579	294/29008	0.00655952	0.0437773	0.0306899	Acvr1b/Ash1l/Bcl2/Cbx7/Dkk1/Eda/Fosl2/Fzd3/Lama5/Plec/Vangl2/Vdr/Zfp36	13
Up-regualted	GO:0070482	response to oxygen levels	13/579	296/29008	0.0069267	0.0450371	0.0315731	Bcl2/Camk2d/Cd34/Egr1/Fosl2/Itpr1/Lct/Mecp2/P2rx2/Rest/Ryr2/Smad3/Tert	13
Up-regualted	GO:0002703	regulation of leukocyte mediated immunity	13/579	297/29008	0.0071163	0.0455885	0.0319596	Arid5a/Clcf1/Clnk/Dnase1/Gata2/Gata3/Il18rap/Lilrb4b/Parp3/Plcg2/Ptprc/Stap1/Tnfrsf1b	13
Up-regualted	GO:0046883	regulation of hormone secretion	13/579	302/29008	0.00812682	0.0489587	0.0343223	Clcf1/Clock/Gck/Ildr1/Kdm5b/Nlgn2/Nr0b2/Rest/Rfx3/Slc9b2/Stxbp4/Vdr/Zbed6	13
Up-regualted	GO:0032922	circadian regulation of gene expression	12/579	71/29008	1.56596e-08	1.15642e-05	8.10706e-06	Clock/Egr1/Huwe1/Kdm2a/Mycbp2/Ncoa2/Nr0b2/Nrip1/Per1/Ppargc1a/Rbm4b/Zfhx3	12
Up-regualted	GO:0006304	DNA modification	12/579	103/29008	1.04823e-06	0.000153532	0.000107633	Atf7ip/Baz2a/Ddx4/Dnmt3a/Dnmt3b/Gata3/Kcnq1ot1/Mecp2/Parp3/Tdrd1/Tet1/Tox	12
Up-regualted	GO:0030316	osteoclast differentiation	12/579	116/29008	3.72868e-06	0.000328478	0.000230278	Cd300lf/Farp2/Fgfr3/Foxp1/Inpp5d/Junb/Lilrb4b/Lrrk1/Rassf2/Sbno2/Slc9b2/Snx10	12
Up-regualted	GO:0050852	T cell receptor signaling pathway	12/579	134/29008	1.65133e-05	0.000918805	0.000644125	Abl1/Braf/Cblb/Cd247/Gata3/Lilrb4b/Nfkbid/Pde4d/Plcg2/Ptprc/Rc3h2/Skint3	12
Up-regualted	GO:0045667	regulation of osteoblast differentiation	12/579	158/29008	8.38328e-05	0.00256259	0.0017965	Acvr2b/Bmpr2/Ccn1/Mef2c/Rassf2/Rest/Runx2/Ski/Smad3/Smad5/Suco/Zhx3	12
Up-regualted	GO:0046474	glycerophospholipid biosynthetic process	12/579	163/29008	0.000112892	0.00308705	0.00216416	Agpat2/Chka/Etnk1/Inpp1/Itpkc/Pign/Pik3c2a/Pik3c2g/Pik3cg/Plcg2/Smg1/Socs3	12
Up-regualted	GO:0045580	regulation of T cell differentiation	12/579	165/29008	0.000126729	0.00330296	0.00231553	Abl1/Braf/Gata3/Il1rl2/Irf1/Lilrb4b/Nfkbid/Ptprc/Rc3h2/Tox/Zfp608/Zfp609	12
Up-regualted	GO:0071248	cellular response to metal ion	12/579	167/29008	0.000141996	0.00359384	0.00251945	Braf/Dlg4/Fosb/Fus/Iqgap1/Jun/Junb/Mapk8/Mecp2/Mef2c/Pkd2/Plcg2	12
Up-regualted	GO:0060402	calcium ion transport into cytosol	12/579	168/29008	0.000150201	0.00369814	0.00259256	Abl1/Bcl2/Camk2d/Itgav/Itpr1/Lhcgr/Pde4d/Pkd2/Plcg2/Ptprc/Ramp3/Ryr2	12
Up-regualted	GO:0002700	regulation of production of molecular mediator of immune response	12/579	177/29008	0.000244174	0.00512123	0.00359022	Angpt1/Arid5a/Clcf1/Clnk/Foxp1/Gata3/Lilrb4b/Parp3/Pkn1/Plcg2/Ptprc/Tnfrsf1b	12
Up-regualted	GO:0071772	response to BMP	12/579	184/29008	0.00034823	0.00663245	0.00464965	Abl1/Acvr2b/Bmpr2/Ccn1/Dkk1/Egr1/Gata3/Gdf2/Runx2/Ski/Smad3/Smad5	12
Up-regualted	GO:0071773	cellular response to BMP stimulus	12/579	184/29008	0.00034823	0.00663245	0.00464965	Abl1/Acvr2b/Bmpr2/Ccn1/Dkk1/Egr1/Gata3/Gdf2/Runx2/Ski/Smad3/Smad5	12
Up-regualted	GO:1903555	regulation of tumor necrosis factor superfamily cytokine production	12/579	186/29008	0.00038408	0.00720441	0.00505062	Angpt1/Arhgef2/Arid5a/Cd274/Cd34/Foxp1/Oas1c/Oas3/Plcg2/Ptprc/Stat3/Zfp36	12
Up-regualted	GO:0071706	tumor necrosis factor superfamily cytokine production	12/579	191/29008	0.000487592	0.00841308	0.00589796	Angpt1/Arhgef2/Arid5a/Cd274/Cd34/Foxp1/Oas1c/Oas3/Plcg2/Ptprc/Stat3/Zfp36	12
Up-regualted	GO:0046578	regulation of Ras protein signal transduction	12/579	200/29008	0.000733242	0.0110365	0.0077371	Abl1/Akap13/Arhgef2/Camk2d/Dennd1a/Dennd4c/Dock2/P2ry10b/Pik3cg/Rasal3/Scai/Spry1	12
Up-regualted	GO:0007519	skeletal muscle tissue development	12/579	201/29008	0.000766005	0.0114255	0.00800978	Bcl2/Bcl9/Egr1/Foxp1/Hdac9/Hlf/Mef2c/Nr4a1/P2rx2/Plec/Ski/Svil	12
Up-regualted	GO:0048771	tissue remodeling	12/579	202/29008	0.000799983	0.0116598	0.00817403	Acvr2b/Bmpr2/Fgfr3/Inpp5d/Itgav/Lrrk1/Mef2c/Nox4/Rassf2/Snx10/Suco/Vdr	12
Up-regualted	GO:0048736	appendage development	12/579	206/29008	0.000948749	0.0128883	0.0090353	Atrx/Bmpr2/Dkk1/Hoxa10/Hoxa9/Mecom/Mycn/Pbx1/Rc3h2/Runx2/Ski/Wdr19	12
Up-regualted	GO:0060173	limb development	12/579	206/29008	0.000948749	0.0128883	0.0090353	Atrx/Bmpr2/Dkk1/Hoxa10/Hoxa9/Mecom/Mycn/Pbx1/Rc3h2/Runx2/Ski/Wdr19	12
Up-regualted	GO:1902905	positive regulation of supramolecular fiber organization	12/579	208/29008	0.00103136	0.0135832	0.00952246	Abi2/Abl1/Braf/Fchsd2/Hip1r/Mapk8/Mecp2/Nav3/Nox4/Rictor/Slain1/Smad3	12
Up-regualted	GO:0060538	skeletal muscle organ development	12/579	212/29008	0.00121457	0.0149646	0.0104909	Bcl2/Bcl9/Egr1/Foxp1/Hdac9/Hlf/Mef2c/Nr4a1/P2rx2/Plec/Ski/Svil	12
Up-regualted	GO:0051651	maintenance of location in cell	12/579	220/29008	0.00166231	0.0186444	0.0130706	Abl1/Camk2d/Itgav/Itpr1/Lhcgr/Pde4d/Pkd2/Plcg2/Ptprc/Ryr2/Sun2/Syne1	12
Up-regualted	GO:0030073	insulin secretion	12/579	230/29008	0.00240454	0.0236783	0.0165996	Acvr2b/Clock/Dgat1/Gck/Nlgn2/Nr0b2/Rest/Rfx3/Slc18a2/Slc9b2/Stxbp4/Zbed6	12
Up-regualted	GO:0031668	cellular response to extracellular stimulus	12/579	231/29008	0.00249164	0.0238658	0.016731	Bcl2/Cdkn1a/Gck/Jun/Mapk8/Pik3c2a/Plec/Ptprc/Sesn3/Sik1/Stk26/Vdr	12
Up-regualted	GO:0045930	negative regulation of mitotic cell cycle	12/579	231/29008	0.00249164	0.0238658	0.016731	Abl1/Bcl2/Cdkn1a/Fgfr3/Fhl4/Fzd3/Gpr132/Pkd2/Smad3/Taok1/Trrap/Zc3h12d	12
Up-regualted	GO:0051403	stress-activated MAPK cascade	12/579	238/29008	0.00317598	0.0284402	0.0199379	Atf7/Fgfr3/Map3k12/Mapk8/Mapkbp1/Mecom/Per1/Rassf2/Smad3/Taok1/Traf3/Zfp36	12
Up-regualted	GO:0006836	neurotransmitter transport	12/579	244/29008	0.00387694	0.0317332	0.0222464	Braf/Erc1/Git2/Mctp1/Mef2c/Nr4a1/P2rx2/Ppp1r9a/Slc18a2/Slc28a2/Syn3/Vamp1	12
Up-regualted	GO:0031098	stress-activated protein kinase signaling cascade	12/579	248/29008	0.00440972	0.0338033	0.0236977	Atf7/Fgfr3/Map3k12/Mapk8/Mapkbp1/Mecom/Per1/Rassf2/Smad3/Taok1/Traf3/Zfp36	12
Up-regualted	GO:1903320	regulation of protein modification by small protein conjugation or removal	12/579	248/29008	0.00440972	0.0338033	0.0236977	Abl1/Angpt1/Cblb/Dtx3l/Egr1/Fgfr3/Hmg20a/Huwe1/Kdm2a/Mapk8/Mycbp2/Rnf180	12
Up-regualted	GO:0010001	glial cell differentiation	12/579	255/29008	0.00548202	0.0393409	0.0275797	Abl1/Clcf1/Exoc4/Fgfr3/Mecp2/Mycn/Nab2/Plec/Ski/Stat3/Tenm4/Tnfrsf1b	12
Up-regualted	GO:0001505	regulation of neurotransmitter levels	12/579	257/29008	0.00582367	0.0402524	0.0282188	Braf/Erc1/Git2/Mctp1/Mef2c/Nr4a1/P2rx2/Pde1b/Ppp1r9a/Slc18a2/Syn3/Vamp1	12
Up-regualted	GO:0051348	negative regulation of transferase activity	12/579	259/29008	0.006182	0.0417643	0.0292787	Abl1/Cblb/Cdkn1a/Dtx3l/Lilrb4b/Parp3/Pik3ip1/Pkn1/Plec/Ptprc/Spry1/Zfp36	12
Up-regualted	GO:0045444	fat cell differentiation	12/579	260/29008	0.00636758	0.0426688	0.0299128	Aldh6a1/Creb5/Gata2/Gata3/Mecom/Nr4a1/Prdm16/Rreb1/Smad3/Steap4/Ttc8/Zfp36	12
Up-regualted	GO:0032886	regulation of microtubule-based process	12/579	262/29008	0.00675196	0.0445809	0.0312533	Abl1/Arhgef2/Cfap69/Dst/Hdgfl3/Mapk8/Mecp2/Nav3/Parp3/Slain1/Spag6l/Taok1	12
Up-regualted	GO:0044728	DNA methylation or demethylation	11/579	90/29008	1.8245e-06	0.000205339	0.000143952	Atf7ip/Baz2a/Ddx4/Dnmt3a/Dnmt3b/Gata3/Kcnq1ot1/Mecp2/Tdrd1/Tet1/Tox	11
Up-regualted	GO:0002088	lens development in camera-type eye	11/579	94/29008	2.81788e-06	0.00027361	0.000191813	Abi2/Fgfr3/Frs2/Gata3/Meis1/Pds5b/Pou2f1/Six5/Ski/Smad3/Spry1	11
Up-regualted	GO:0001704	formation of primary germ layer	11/579	102/29008	6.2988e-06	0.000503092	0.00035269	Bmpr2/Dkk1/Dusp2/Dusp4/Dusp5/Exoc4/Eya1/Itgav/Kdm6b/Smad3/Wls	11
Up-regualted	GO:0046632	alpha-beta T cell differentiation	11/579	129/29008	5.80083e-05	0.00202294	0.00141817	Abl1/Bcl2/Braf/Foxp1/Gata3/Irf1/Lilrb4b/Nfkbid/Rc3h2/Stat3/Tox	11
Up-regualted	GO:2000027	regulation of animal organ morphogenesis	11/579	132/29008	7.15305e-05	0.00228528	0.00160209	Abl1/Cd34/Dkk1/Etv5/Frs2/Fzd3/Gata3/Runx2/Spag6l/Spry1/Vangl2	11
Up-regualted	GO:0030278	regulation of ossification	11/579	136/29008	9.36933e-05	0.00276172	0.00193609	Acvr2b/Bcl2/Bmpr2/Ccn1/Dkk1/Fgfr3/Mef2c/Pbx1/Runx2/Smad3/Vdr	11
Up-regualted	GO:0042303	molting cycle	11/579	138/29008	0.000106815	0.00301248	0.00211189	Acvr1b/Bcl2/Clock/Dkk1/Eda/Farp2/Fzd3/Lama5/Per1/Tert/Vangl2	11
Up-regualted	GO:0042633	hair cycle	11/579	138/29008	0.000106815	0.00301248	0.00211189	Acvr1b/Bcl2/Clock/Dkk1/Eda/Farp2/Fzd3/Lama5/Per1/Tert/Vangl2	11
Up-regualted	GO:0097553	calcium ion transmembrane import into cytosol	11/579	144/29008	0.000155979	0.00376786	0.00264144	Abl1/Camk2d/Itgav/Itpr1/Lhcgr/Pde4d/Pkd2/Plcg2/Ptprc/Ramp3/Ryr2	11
Up-regualted	GO:0010469	regulation of signaling receptor activity	11/579	146/29008	0.000176144	0.00409514	0.00287088	Btc/Cblb/Dlg4/Klhl24/Lilrb4b/Mef2c/Nlgn2/Pde4d/Ppargc1a/Ramp3/Shank3	11
Up-regualted	GO:0048706	embryonic skeletal system development	11/579	147/29008	0.000187028	0.0042964	0.00301198	Eya1/Hoxa9/Hoxb6/Mef2c/Mycn/Ndst1/Pbx1/Runx2/Smad3/Wdr19/Xylt1	11
Up-regualted	GO:0072073	kidney epithelium development	11/579	150/29008	0.000223162	0.00484693	0.00339792	Bcl2/Eya1/Gata3/Gdf11/Lama5/Mef2c/Pbx1/Slit2/Smad3/Smad5/Spry1	11
Up-regualted	GO:0030010	establishment of cell polarity	11/579	151/29008	0.000236448	0.0050038	0.0035079	Arhgef2/Coro7/Dock2/Exoc4/Eya1/Gata3/Rictor/Spag6l/Spry1/Ttc8/Vangl2	11
Up-regualted	GO:0022612	gland morphogenesis	11/579	155/29008	0.000296477	0.00591998	0.00415017	Bcl2/Eda/Etv5/Frs2/Itpr1/Kdm5b/Lama5/Slit2/Tnc/Vdr/Zfp157	11
Up-regualted	GO:0046661	male sex differentiation	11/579	172/29008	0.000714266	0.0109004	0.00764167	Atn1/Atrx/Bcl2/Fndc3a/Gata3/Hoxa10/Hoxa9/Lhcgr/Map7/Rhobtb3/Smad5	11
Up-regualted	GO:0030509	BMP signaling pathway	11/579	173/29008	0.000749349	0.0112108	0.00785929	Abl1/Acvr2b/Bmpr2/Ccn1/Dkk1/Egr1/Gdf2/Runx2/Ski/Smad3/Smad5	11
Up-regualted	GO:1903169	regulation of calcium ion transmembrane transport	11/579	174/29008	0.000785851	0.0116165	0.00814371	Abl1/Camk2d/Gem/Lhcgr/Pde4d/Pik3cg/Pkd2/Plcg2/Ramp3/Ryr2/Sestd1	11
Up-regualted	GO:0051494	negative regulation of cytoskeleton organization	11/579	175/29008	0.000823815	0.0119285	0.0083624	Arap1/Arhgef2/Hdgfl3/Hip1r/Nav3/Ppp1r9a/Shank3/Slit2/Svil/Taok1/Tmod3	11
Up-regualted	GO:1902904	negative regulation of supramolecular fiber organization	11/579	177/29008	0.000904313	0.0126147	0.00884348	Arap1/Arhgef2/Hdgfl3/Hip1r/Nav3/Ppp1r9a/Shank3/Slit2/Svil/Taok1/Tmod3	11
Up-regualted	GO:2001257	regulation of cation channel activity	11/579	180/29008	0.00103718	0.0136237	0.00955081	Dlg4/Fgf11/Gem/Klhl24/Mef2c/Nlgn2/Pde4d/Pkd2/Plcg2/Ppargc1a/Shank3	11
Up-regualted	GO:0001935	endothelial cell proliferation	11/579	181/29008	0.00108489	0.014181	0.00994152	Bmpr2/Cd34/Fgfr3/Gata2/Gdf2/Jun/Mef2c/Nr4a1/Rictor/Stat3/Vash1	11
Up-regualted	GO:0032680	regulation of tumor necrosis factor production	11/579	183/29008	0.00118576	0.014828	0.0103951	Angpt1/Arhgef2/Arid5a/Cd34/Foxp1/Oas1c/Oas3/Plcg2/Ptprc/Stat3/Zfp36	11
Up-regualted	GO:0042594	response to starvation	11/579	184/29008	0.00123901	0.0150752	0.0105684	Bcl2/Cdkn1a/Foxk1/Gck/Jun/Mapk8/Pik3c2a/Sesn3/Sik1/Stk26/Zfp36	11
Up-regualted	GO:0032640	tumor necrosis factor production	11/579	188/29008	0.00147207	0.0170583	0.0119587	Angpt1/Arhgef2/Arid5a/Cd34/Foxp1/Oas1c/Oas3/Plcg2/Ptprc/Stat3/Zfp36	11
Up-regualted	GO:0048592	eye morphogenesis	11/579	188/29008	0.00147207	0.0170583	0.0119587	Abi2/Bcl2/Fgfr3/Frs2/Gdf11/Meis1/Mfap2/Pou2f1/Ski/Stat3/Ttc8	11
Up-regualted	GO:1902107	positive regulation of leukocyte differentiation	11/579	188/29008	0.00147207	0.0170583	0.0119587	Gata3/Il1rl2/Inpp5d/Irf1/Jun/Lilrb4b/Nfkbid/Ptprc/Slc9b2/Tox/Zfp609	11
Up-regualted	GO:1903708	positive regulation of hemopoiesis	11/579	188/29008	0.00147207	0.0170583	0.0119587	Gata3/Il1rl2/Inpp5d/Irf1/Jun/Lilrb4b/Nfkbid/Ptprc/Slc9b2/Tox/Zfp609	11
Up-regualted	GO:0050905	neuromuscular process	11/579	199/29008	0.00230355	0.0231895	0.0162569	Abl1/Ccdc78/Dlg4/Itpr1/Kcnj2/Mecp2/Mycbp2/Nlgn2/Nr4a1/Rest/Shank3	11
Up-regualted	GO:0003205	cardiac chamber development	11/579	200/29008	0.00239494	0.0236722	0.0165953	Bmpr2/Ccn1/Frs2/Gata3/Mef2c/Mybpc3/Ndst1/Nphp3/Ryr2/Slit2/Vangl2	11
Up-regualted	GO:0050777	negative regulation of immune response	11/579	206/29008	0.00300687	0.0274468	0.0192415	Inpp5d/Irf1/Lilrb4b/Mapkbp1/Nlrc5/Oas1c/Oas3/Parp3/Pglyrp2/Ptprc/Rc3h2	11
Up-regualted	GO:0009566	fertilization	11/579	208/29008	0.00323673	0.0285709	0.0200295	Acrbp/Ash1l/Cfap69/Fndc3a/Hoxa10/Hoxa9/Itgav/Kdm5b/Kmt2c/Map7/Zan	11
Up-regualted	GO:0099111	microtubule-based transport	11/579	208/29008	0.00323673	0.0285709	0.0200295	Cfap54/Dst/Fyco1/Ift81/Katnip/Mecp2/Rfx3/Spag6l/Sun2/Syne2/Wdr19	11
Up-regualted	GO:0048469	cell maturation	11/579	214/29008	0.00401206	0.0325983	0.0228529	Anks1/Bcl2/Farp2/Gata2/Gata3/Gdf11/Mecp2/Pou2f2/Rfx3/Ropn1l/Runx2	11
Up-regualted	GO:0035265	organ growth	11/579	216/29008	0.0043011	0.0337862	0.0236857	Acvr2b/Akap13/Bcl2/Camk2d/Col14a1/Foxp1/Map7/Mef2c/Meis1/Tenm4/Vgll4	11
Up-regualted	GO:0030522	intracellular receptor signaling pathway	11/579	217/29008	0.0044517	0.0340724	0.0238863	Clock/Foxp1/Kmt2d/Ncoa2/Oas3/Per1/Pum1/Stat3/Trerf1/Trim68/Vdr	11
Up-regualted	GO:0032984	protein-containing complex disassembly	11/579	218/29008	0.00460646	0.0348795	0.0244521	Arhgef2/Fyco1/Hdgfl3/Nav3/Nckap5/Rubcnl/Scaf8/Setx/Svil/Taok1/Tmod3	11
Up-regualted	GO:0045732	positive regulation of protein catabolic process	11/579	221/29008	0.00509652	0.0374879	0.0262807	Cblb/Disc1/Huwe1/Mapk8/Rnf180/Tiparp/Tmtc3/Tnfrsf1b/Vgll4/Zer1/Zyg11b	11
Up-regualted	GO:0048545	response to steroid hormone	11/579	226/29008	0.00600403	0.0409797	0.0287286	Akap13/Bcl2/Clock/Foxp1/Kmt2d/Ncoa2/Per1/Rest/Trerf1/Trim68/Zfp36	11
Up-regualted	GO:0071559	response to transforming growth factor beta	11/579	230/29008	0.00681772	0.0448358	0.0314319	Jun/Mef2c/Pbld2/Ppargc1a/Prdm16/Ski/Smad3/Smad5/Spry1/Stat3/Zfhx3	11
Up-regualted	GO:0090276	regulation of peptide hormone secretion	11/579	230/29008	0.00681772	0.0448358	0.0314319	Clcf1/Clock/Gck/Ildr1/Nlgn2/Nr0b2/Rest/Rfx3/Slc9b2/Stxbp4/Zbed6	11
Up-regualted	GO:0006402	mRNA catabolic process	11/579	231/29008	0.00703402	0.0451783	0.0316721	Ago1/Cirbp/Fus/Ikbke/Pum1/Rc3h2/Samd4b/Smg1/Smg6/Zc3h12d/Zfp36	11
Up-regualted	GO:0002791	regulation of peptide secretion	11/579	235/29008	0.00795335	0.0486765	0.0341245	Clcf1/Clock/Gck/Ildr1/Nlgn2/Nr0b2/Rest/Rfx3/Slc9b2/Stxbp4/Zbed6	11
Up-regualted	GO:0031348	negative regulation of defense response	11/579	236/29008	0.00819715	0.0491432	0.0344516	Ash1l/Gata3/Mapkbp1/Nlrc5/Oas1c/Oas3/Slit2/Smad3/Socs3/Tnfrsf1b/Zfp36	11
Up-regualted	GO:0032623	interleukin-2 production	10/579	74/29008	2.12066e-06	0.000228294	0.000160044	Abl1/Cd247/Cd34/Gata3/Lilrb4b/Nav3/Pde4d/Plcg2/Ptprc/Zfp36	10
Up-regualted	GO:1902893	regulation of pri-miRNA transcription by RNA polymerase II	10/579	83/29008	6.11532e-06	0.000496444	0.00034803	Egr1/Gata2/Gata3/Jun/Lilrb4b/Mrtfa/Rest/Smad3/Stat3/Tert	10
Up-regualted	GO:0061614	pri-miRNA transcription by RNA polymerase II	10/579	85/29008	7.59185e-06	0.000564565	0.000395786	Egr1/Gata2/Gata3/Jun/Lilrb4b/Mrtfa/Rest/Smad3/Stat3/Tert	10
Up-regualted	GO:0044344	cellular response to fibroblast growth factor stimulus	10/579	93/29008	1.69997e-05	0.000935362	0.000655732	Fgfr3/Frs2/Gata3/Iqgap1/Ndst1/Nr4a1/Runx2/Setx/Spry1/Zfp36	10
Up-regualted	GO:0071774	response to fibroblast growth factor	10/579	95/29008	2.05184e-05	0.00110442	0.000774251	Fgfr3/Frs2/Gata3/Iqgap1/Ndst1/Nr4a1/Runx2/Setx/Spry1/Zfp36	10
Up-regualted	GO:0001657	ureteric bud development	10/579	104/29008	4.51641e-05	0.00176105	0.00123457	Bcl2/Eya1/Gata3/Gdf11/Lama5/Pbx1/Slit2/Smad3/Smad5/Spry1	10
Up-regualted	GO:0072163	mesonephric epithelium development	10/579	104/29008	4.51641e-05	0.00176105	0.00123457	Bcl2/Eya1/Gata3/Gdf11/Lama5/Pbx1/Slit2/Smad3/Smad5/Spry1	10
Up-regualted	GO:0072164	mesonephric tubule development	10/579	104/29008	4.51641e-05	0.00176105	0.00123457	Bcl2/Eya1/Gata3/Gdf11/Lama5/Pbx1/Slit2/Smad3/Smad5/Spry1	10
Up-regualted	GO:0001823	mesonephros development	10/579	107/29008	5.76463e-05	0.00202294	0.00141817	Bcl2/Eya1/Gata3/Gdf11/Lama5/Pbx1/Slit2/Smad3/Smad5/Spry1	10
Up-regualted	GO:0051209	release of sequestered calcium ion into cytosol	10/579	114/29008	9.86168e-05	0.00285585	0.00200208	Abl1/Camk2d/Itgav/Itpr1/Lhcgr/Pde4d/Pkd2/Plcg2/Ptprc/Ryr2	10
Up-regualted	GO:0051283	negative regulation of sequestering of calcium ion	10/579	115/29008	0.000106111	0.00301248	0.00211189	Abl1/Camk2d/Itgav/Itpr1/Lhcgr/Pde4d/Pkd2/Plcg2/Ptprc/Ryr2	10
Up-regualted	GO:0043534	blood vessel endothelial cell migration	10/579	116/29008	0.000114081	0.00308705	0.00216416	Abl1/Angpt1/Gata2/Hdac9/Mecp2/Mef2c/Nr4a1/Pik3c2a/Slit2/Vash1	10
Up-regualted	GO:0010927	cellular component assembly involved in morphogenesis	10/579	117/29008	0.000122552	0.00326351	0.00228787	Acrbp/Akap13/Foxp1/Mef2c/Mybpc3/Neb/Pikfyve/Plec/Tenm4/Tmod3	10
Up-regualted	GO:0051282	regulation of sequestering of calcium ion	10/579	117/29008	0.000122552	0.00326351	0.00228787	Abl1/Camk2d/Itgav/Itpr1/Lhcgr/Pde4d/Pkd2/Plcg2/Ptprc/Ryr2	10
Up-regualted	GO:0051208	sequestering of calcium ion	10/579	119/29008	0.000141094	0.00359384	0.00251945	Abl1/Camk2d/Itgav/Itpr1/Lhcgr/Pde4d/Pkd2/Plcg2/Ptprc/Ryr2	10
Up-regualted	GO:0031109	microtubule polymerization or depolymerization	10/579	126/29008	0.000225708	0.00486194	0.00340844	Abl1/Arhgef2/Dst/Hdgfl3/Mapk8/Mecp2/Nav3/Nckap5/Slain1/Taok1	10
Up-regualted	GO:0042752	regulation of circadian rhythm	10/579	128/29008	0.000256524	0.00531508	0.00372612	Clock/Crtc1/Kdm2a/Kdm5b/Mapk8/Per1/Ppargc1a/Rbm4b/Sik1/Zfhx3	10
Up-regualted	GO:0051592	response to calcium ion	10/579	130/29008	0.000290785	0.00588576	0.00412619	Braf/Fosb/Fus/Iqgap1/Jun/Junb/Mef2c/Pkd2/Plcg2/Ryr2	10
Up-regualted	GO:0030177	positive regulation of Wnt signaling pathway	10/579	139/29008	0.000495972	0.00849845	0.0059578	Abl1/Csnk1g1/Disc1/Eda/Fgfr3/Lmx1a/Lrrk1/Smad3/Tert/Wls	10
Up-regualted	GO:0008584	male gonad development	10/579	140/29008	0.000524779	0.00874985	0.00613405	Atn1/Atrx/Bcl2/Fndc3a/Gata3/Hoxa10/Hoxa9/Lhcgr/Map7/Rhobtb3	10
Up-regualted	GO:0046546	development of primary male sexual characteristics	10/579	141/29008	0.000554959	0.00903999	0.00633745	Atn1/Atrx/Bcl2/Fndc3a/Gata3/Hoxa10/Hoxa9/Lhcgr/Map7/Rhobtb3	10
Up-regualted	GO:0009855	determination of bilateral symmetry	10/579	142/29008	0.000586561	0.00933971	0.00654757	Acvr2b/Kdm2a/Mapk8/Mef2c/Mib1/Nphp3/Pkd2/Rfx3/Smad3/Vangl2	10
Up-regualted	GO:0009799	specification of symmetry	10/579	143/29008	0.000619637	0.00971026	0.00680734	Acvr2b/Kdm2a/Mapk8/Mef2c/Mib1/Nphp3/Pkd2/Rfx3/Smad3/Vangl2	10
Up-regualted	GO:0051147	regulation of muscle cell differentiation	10/579	150/29008	0.000896963	0.0125829	0.00882119	Bcl2/Bmpr2/Dkk1/Foxp1/Frs2/Hdac9/Mecp2/Mef2c/Sik1/Zbed6	10
Up-regualted	GO:0016571	histone methylation	10/579	154/29008	0.00109652	0.0142519	0.0099912	Ash1l/Atrx/Baz2a/Dnmt3b/Gata3/Kmt2c/Kmt2d/Lcor/Mecp2/Tet1	10
Up-regualted	GO:0070507	regulation of microtubule cytoskeleton organization	10/579	159/29008	0.00139554	0.0166123	0.011646	Abl1/Arhgef2/Dst/Hdgfl3/Mapk8/Mecp2/Nav3/Parp3/Slain1/Taok1	10
Up-regualted	GO:0071383	cellular response to steroid hormone stimulus	10/579	165/29008	0.00183855	0.0200982	0.0140898	Akap13/Clock/Foxp1/Kmt2d/Ncoa2/Per1/Rest/Trerf1/Trim68/Zfp36	10
Up-regualted	GO:0001936	regulation of endothelial cell proliferation	10/579	166/29008	0.00192236	0.020605	0.014445	Bmpr2/Fgfr3/Gata2/Gdf2/Jun/Mef2c/Nr4a1/Rictor/Stat3/Vash1	10
Up-regualted	GO:0051961	negative regulation of nervous system development	10/579	166/29008	0.00192236	0.020605	0.014445	Arhgef2/Dkk1/Fgfr3/Hook3/Mecp2/Mycn/Rest/Ski/Slit2/Tert	10
Up-regualted	GO:0030183	B cell differentiation	10/579	170/29008	0.00228894	0.0231323	0.0162168	Abl1/Bcl2/Cdh17/Clcf1/Foxp1/Hdac9/Inpp5d/Plcg2/Pou2f2/Ptprc	10
Up-regualted	GO:0006941	striated muscle contraction	10/579	173/29008	0.00259913	0.0246569	0.0172856	Camk2d/Ccdc78/Kcnh2/Kcnj2/Mybpc3/Nr4a1/Pde4d/Pgam2/Ryr2/Smad5	10
Up-regualted	GO:0001890	placenta development	10/579	174/29008	0.0027097	0.0254878	0.0178681	Ash1l/Birc6/Bmpr2/Ccn1/Gata2/Itgav/Junb/Pkd2/Socs3/Vash1	10
Up-regualted	GO:0032635	interleukin-6 production	10/579	174/29008	0.0027097	0.0254878	0.0178681	Arhgef2/Arid5a/Ash1l/Il18rap/Il1rl2/Inpp5d/Lilrb4b/Plcg2/Pou2f2/Stat3	10
Up-regualted	GO:0035107	appendage morphogenesis	10/579	177/29008	0.00306413	0.0278414	0.0195181	Atrx/Dkk1/Hoxa10/Hoxa9/Mecom/Mycn/Pbx1/Runx2/Ski/Wdr19	10
Up-regualted	GO:0035108	limb morphogenesis	10/579	177/29008	0.00306413	0.0278414	0.0195181	Atrx/Dkk1/Hoxa10/Hoxa9/Mecom/Mycn/Pbx1/Runx2/Ski/Wdr19	10
Up-regualted	GO:0043524	negative regulation of neuron apoptotic process	10/579	184/29008	0.0040355	0.0325983	0.0228529	Angpt1/Bcl2/Braf/Clcf1/Jun/Map3k12/Mecp2/Mef2c/Ppargc1a/Tert	10
Up-regualted	GO:0007269	neurotransmitter secretion	10/579	187/29008	0.00451981	0.0343652	0.0240916	Braf/Erc1/Git2/Mctp1/Mef2c/Nr4a1/P2rx2/Ppp1r9a/Syn3/Vamp1	10
Up-regualted	GO:0099643	signal release from synapse	10/579	187/29008	0.00451981	0.0343652	0.0240916	Braf/Erc1/Git2/Mctp1/Mef2c/Nr4a1/P2rx2/Ppp1r9a/Syn3/Vamp1	10
Up-regualted	GO:0043409	negative regulation of MAPK cascade	10/579	189/29008	0.00486731	0.0363095	0.0254546	Abl1/Ash1l/Dusp2/Dusp4/Dusp5/Lilrb4b/Mecom/Per1/Ptprc/Spry1	10
Up-regualted	GO:0030041	actin filament polymerization	10/579	191/29008	0.00523545	0.0379035	0.0265721	Abi2/Abl1/Diaph2/Fchsd2/Hip1r/Ppp1r9a/Rictor/Slit2/Svil/Tmod3	10
Up-regualted	GO:0000082	G1/S transition of mitotic cell cycle	10/579	194/29008	0.00582815	0.0402524	0.0282188	Acvr1b/Bcl2/Camk2d/Cdkn1a/Fhl4/Gpr132/Pim2/Pkd2/Tert/Zc3h12d	10
Up-regualted	GO:0006479	protein methylation	10/579	194/29008	0.00582815	0.0402524	0.0282188	Ash1l/Atrx/Baz2a/Dnmt3b/Gata3/Kmt2c/Kmt2d/Lcor/Mecp2/Tet1	10
Up-regualted	GO:0008213	protein alkylation	10/579	194/29008	0.00582815	0.0402524	0.0282188	Ash1l/Atrx/Baz2a/Dnmt3b/Gata3/Kmt2c/Kmt2d/Lcor/Mecp2/Tet1	10
Up-regualted	GO:0043112	receptor metabolic process	10/579	194/29008	0.00582815	0.0402524	0.0282188	Angpt1/Arap1/Dkk1/Dlg4/Dtx3l/Gria3/Grk3/Lilrb4b/Plcg2/Ramp3	10
Up-regualted	GO:0002262	myeloid cell homeostasis	10/579	196/29008	0.00625148	0.0421762	0.0295675	Acvr1b/Gata2/Gata3/Hoxb6/Inpp5d/Mecom/Smad5/Stat3/Tmod3/Zfp36	10
Up-regualted	GO:0061351	neural precursor cell proliferation	10/579	197/29008	0.00647192	0.043251	0.0303209	Arhgef2/Disc1/Frs2/Fzd3/Gata2/Hook3/Mapk8/Numbl/Rere/Tox	10
Up-regualted	GO:0031669	cellular response to nutrient levels	10/579	199/29008	0.00693089	0.0450371	0.0315731	Bcl2/Cdkn1a/Gck/Jun/Mapk8/Pik3c2a/Sesn3/Sik1/Stk26/Vdr	10
Up-regualted	GO:0046890	regulation of lipid biosynthetic process	10/579	202/29008	0.00766613	0.048054	0.0336881	Abcd2/Asxl3/Ccn1/Dgat1/Egr1/H6pd/Lhcgr/Ppargc1a/Rest/Sik1	10
Up-regualted	GO:0032663	regulation of interleukin-2 production	9/579	67/29008	7.21691e-06	0.000558408	0.00039147	Abl1/Cd34/Gata3/Lilrb4b/Nav3/Pde4d/Plcg2/Ptprc/Zfp36	9
Up-regualted	GO:0006305	DNA alkylation	9/579	73/29008	1.47381e-05	0.000848638	0.000594934	Atf7ip/Baz2a/Ddx4/Dnmt3a/Dnmt3b/Kcnq1ot1/Mecp2/Tdrd1/Tet1	9
Up-regualted	GO:0006306	DNA methylation	9/579	73/29008	1.47381e-05	0.000848638	0.000594934	Atf7ip/Baz2a/Ddx4/Dnmt3a/Dnmt3b/Kcnq1ot1/Mecp2/Tdrd1/Tet1	9
Up-regualted	GO:0071277	cellular response to calcium ion	9/579	78/29008	2.53466e-05	0.00126784	0.000888815	Braf/Fosb/Fus/Iqgap1/Jun/Junb/Mef2c/Pkd2/Plcg2	9
Up-regualted	GO:1904035	regulation of epithelial cell apoptotic process	9/579	92/29008	9.43564e-05	0.00276481	0.00193826	Abl1/Angpt1/Braf/Col18a1/Gata2/Gata3/Ppargc1a/Tert/Zfp36	9
Up-regualted	GO:0031110	regulation of microtubule polymerization or depolymerization	9/579	94/29008	0.000111534	0.00308705	0.00216416	Abl1/Arhgef2/Dst/Hdgfl3/Mapk8/Mecp2/Nav3/Slain1/Taok1	9
Up-regualted	GO:0006661	phosphatidylinositol biosynthetic process	9/579	96/29008	0.000131255	0.00338528	0.00237324	Inpp1/Itpkc/Pign/Pik3c2a/Pik3c2g/Pik3cg/Plcg2/Smg1/Socs3	9
Up-regualted	GO:0007044	cell-substrate junction assembly	9/579	96/29008	0.000131255	0.00338528	0.00237324	Abl1/Bcl2/Dst/Iqgap1/Itgav/Plec/Smad3/Tesk2/Tln1	9
Up-regualted	GO:0150115	cell-substrate junction organization	9/579	102/29008	0.000208675	0.00462559	0.00324275	Abl1/Bcl2/Dst/Iqgap1/Itgav/Plec/Smad3/Tesk2/Tln1	9
Up-regualted	GO:0010595	positive regulation of endothelial cell migration	9/579	109/29008	0.000343548	0.00659399	0.00462269	Abl1/Angpt1/Bmpr2/Foxp1/Gata2/Gata3/Hdac9/Pik3c2a/Pik3cg	9
Up-regualted	GO:1902106	negative regulation of leukocyte differentiation	9/579	109/29008	0.000343548	0.00659399	0.00462269	Gata2/Inpp5d/Irf1/Lilrb4b/Nfkbid/Pglyrp2/Prdm16/Rc3h2/Zfp608	9
Up-regualted	GO:0048704	embryonic skeletal system morphogenesis	9/579	110/29008	0.000367661	0.00694907	0.00487161	Eya1/Hoxa9/Hoxb6/Mef2c/Mycn/Ndst1/Runx2/Smad3/Wdr19	9
Up-regualted	GO:0110020	regulation of actomyosin structure organization	9/579	110/29008	0.000367661	0.00694907	0.00487161	Abl1/Akap13/Arap1/Braf/Mef2c/Nox4/Ppp1r9a/Smad3/Ttc8	9
Up-regualted	GO:0046634	regulation of alpha-beta T cell activation	9/579	111/29008	0.000393152	0.0072645	0.00509275	Cblb/Cd274/Gata3/Irf1/Lilrb4b/Nfkbid/Ptprc/Rasal3/Rc3h2	9
Up-regualted	GO:1903707	negative regulation of hemopoiesis	9/579	111/29008	0.000393152	0.0072645	0.00509275	Gata2/Inpp5d/Irf1/Lilrb4b/Nfkbid/Pglyrp2/Prdm16/Rc3h2/Zfp608	9
Up-regualted	GO:0035710	CD4-positive, alpha-beta T cell activation	9/579	115/29008	0.000510117	0.00871069	0.0061066	Braf/Cd274/Foxp1/Gata3/Irf1/Nfkbid/Rc3h2/Stat3/Tox	9
Up-regualted	GO:0007498	mesoderm development	9/579	119/29008	0.000654214	0.010124	0.00709736	Acvr1b/Acvr2b/Bmpr2/Dkk1/Exoc4/Eya1/Kdm6b/Smad3/Wls	9
Up-regualted	GO:0045621	positive regulation of lymphocyte differentiation	9/579	120/29008	0.000694997	0.0106883	0.00749298	Gata3/Il1rl2/Inpp5d/Irf1/Lilrb4b/Nfkbid/Ptprc/Tox/Zfp609	9
Up-regualted	GO:0001959	regulation of cytokine-mediated signaling pathway	9/579	122/29008	0.000782794	0.011606	0.00813632	Angpt1/Cd300lf/Ikbke/Nlrc5/Oas1c/Oas3/Ptprc/Slit2/Stap1	9
Up-regualted	GO:0040029	regulation of gene expression, epigenetic	9/579	123/29008	0.000829961	0.0119824	0.00840022	Atf7ip/Baz2a/Dnmt3a/Dnmt3b/Kcnq1ot1/Lrif1/Mecp2/Tasor/Tet1	9
Up-regualted	GO:0034968	histone lysine methylation	9/579	124/29008	0.000879414	0.012407	0.00869788	Ash1l/Atrx/Baz2a/Dnmt3b/Gata3/Kmt2c/Kmt2d/Lcor/Mecp2	9
Up-regualted	GO:0014013	regulation of gliogenesis	9/579	128/29008	0.00110174	0.0142823	0.0100125	Clcf1/Etv5/Fgfr3/Mecp2/Mycn/Ski/Tenm4/Tert/Tnfrsf1b	9
Up-regualted	GO:0043244	regulation of protein-containing complex disassembly	9/579	129/29008	0.00116388	0.0147029	0.0103074	Arhgef2/Fyco1/Hdgfl3/Nav3/Scaf8/Setx/Svil/Taok1/Tmod3	9
Up-regualted	GO:0060759	regulation of response to cytokine stimulus	9/579	132/29008	0.00136748	0.0163175	0.0114393	Angpt1/Cd300lf/Ikbke/Nlrc5/Oas1c/Oas3/Ptprc/Slit2/Stap1	9
Up-regualted	GO:0007368	determination of left/right symmetry	9/579	133/29008	0.00144138	0.0170583	0.0119587	Acvr2b/Kdm2a/Mef2c/Mib1/Nphp3/Pkd2/Rfx3/Smad3/Vangl2	9
Up-regualted	GO:0032609	interferon-gamma production	9/579	135/29008	0.00159881	0.0180781	0.0126736	Abl1/Arid5a/Cd274/Gata3/Il12rb2/Il18rap/Lilrb4b/Pde4d/Pglyrp2	9
Up-regualted	GO:0002761	regulation of myeloid leukocyte differentiation	9/579	137/29008	0.00176974	0.0194751	0.0136529	Fgfr3/Foxp1/Gata2/Inpp5d/Jun/Lilrb4b/Prdm16/Rassf2/Slc9b2	9
Up-regualted	GO:0007266	Rho protein signal transduction	9/579	138/29008	0.00186053	0.0202491	0.0141956	Abl1/Akap13/Arhgef11/Arhgef2/Ctnnal1/Gna13/P2ry10b/Scai/Vangl2	9
Up-regualted	GO:0055123	digestive system development	9/579	139/29008	0.001955	0.0208197	0.0145956	Acvr2b/Bcl2/Fgfr3/Hip1r/Nphp3/Smad3/Vangl2/Wdr19/Wls	9
Up-regualted	GO:0018022	peptidyl-lysine methylation	9/579	141/29008	0.00215542	0.0223075	0.0156386	Ash1l/Atrx/Baz2a/Dnmt3b/Gata3/Kmt2c/Kmt2d/Lcor/Mecp2	9
Up-regualted	GO:0030326	embryonic limb morphogenesis	9/579	143/29008	0.00237186	0.023538	0.0165012	Dkk1/Hoxa10/Hoxa9/Mecom/Mycn/Pbx1/Runx2/Ski/Wdr19	9
Up-regualted	GO:0035113	embryonic appendage morphogenesis	9/579	143/29008	0.00237186	0.023538	0.0165012	Dkk1/Hoxa10/Hoxa9/Mecom/Mycn/Pbx1/Runx2/Ski/Wdr19	9
Up-regualted	GO:1902806	regulation of cell cycle G1/S phase transition	9/579	150/29008	0.00326864	0.0287501	0.0201551	Bcl2/Cdkn1a/Cirbp/Fhl4/Pkd2/Plcg2/Stxbp4/Tert/Zc3h12d	9
Up-regualted	GO:0003231	cardiac ventricle development	9/579	151/29008	0.00341599	0.0295218	0.0206961	Bmpr2/Ccn1/Frs2/Gata3/Mef2c/Mybpc3/Ryr2/Slit2/Vangl2	9
Up-regualted	GO:0034101	erythrocyte homeostasis	9/579	155/29008	0.00405832	0.0325983	0.0228529	Acvr1b/Gata2/Gata3/Hoxb6/Inpp5d/Smad5/Stat3/Tmod3/Zfp36	9
Up-regualted	GO:0072006	nephron development	9/579	155/29008	0.00405832	0.0325983	0.0228529	Angpt1/Bcl2/Egr1/Eya1/Gata3/Lama5/Mef2c/Pbx1/Vangl2	9
Up-regualted	GO:0001539	cilium or flagellum-dependent cell motility	9/579	156/29008	0.00423276	0.0337862	0.0236857	Ash1l/Cfap54/Cfap69/Ddx4/Efhc1/Rfx3/Ropn1l/Slc9b2/Spag6l	9
Up-regualted	GO:0060285	cilium-dependent cell motility	9/579	156/29008	0.00423276	0.0337862	0.0236857	Ash1l/Cfap54/Cfap69/Ddx4/Efhc1/Rfx3/Ropn1l/Slc9b2/Spag6l	9
Up-regualted	GO:2000377	regulation of reactive oxygen species metabolic process	9/579	160/29008	0.00498978	0.0369901	0.0259317	Abcd2/Bcl2/Cdkn1a/Mycn/Nox4/Pikfyve/Plcg2/Slc5a3/Stat3	9
Up-regualted	GO:0009755	hormone-mediated signaling pathway	9/579	161/29008	0.0051945	0.037662	0.0264028	Akap13/Clock/Foxp1/Kmt2d/Lhcgr/Ncoa2/Per1/Trerf1/Trim68	9
Up-regualted	GO:0050768	negative regulation of neurogenesis	9/579	162/29008	0.00540566	0.0390216	0.0273559	Arhgef2/Fgfr3/Hook3/Mecp2/Mycn/Rest/Ski/Slit2/Tert	9
Up-regualted	GO:0009267	cellular response to starvation	9/579	164/29008	0.00584786	0.0403324	0.0282748	Bcl2/Cdkn1a/Gck/Jun/Mapk8/Pik3c2a/Sesn3/Sik1/Stk26	9
Up-regualted	GO:0043487	regulation of RNA stability	9/579	166/29008	0.00631746	0.0425634	0.0298389	Cirbp/Fus/Ikbke/Pum1/Rc3h2/Samd4b/Tnfrsf1b/Zc3h12d/Zfp36	9
Up-regualted	GO:0051100	negative regulation of binding	9/579	169/29008	0.00707558	0.0453863	0.0318179	Atp2a3/Cdkn1a/Disc1/Dkk1/Jun/Mapk8/Mecp2/Pim2/Rest	9
Up-regualted	GO:0007254	JNK cascade	9/579	170/29008	0.00734315	0.0467996	0.0328087	Map3k12/Mapk8/Mapkbp1/Mecom/Per1/Rassf2/Smad3/Taok1/Traf3	9
Up-regualted	GO:1904064	positive regulation of cation transmembrane transport	9/579	170/29008	0.00734315	0.0467996	0.0328087	Abl1/Kcnh2/Kcnj2/Lhcgr/Pkd2/Plcg2/Ramp3/Ryr2/Shank3	9
Up-regualted	GO:0051017	actin filament bundle assembly	9/579	172/29008	0.00790143	0.0486757	0.0341239	Abl1/Arap1/Braf/Nox4/Ppp1r9a/Shank3/Smad3/Spag6l/Ttc8	9
Up-regualted	GO:0042552	myelination	9/579	173/29008	0.00819241	0.0491432	0.0344516	Abcd2/Fgfr3/Nab2/Pikfyve/Plec/Reg2/Ski/Tenm4/Tnfrsf1b	9
Up-regualted	GO:0070828	heterochromatin organization	8/579	53/29008	9.65328e-06	0.000673282	0.000472002	Atf7ip/Baz2a/Dnmt3a/Dnmt3b/Mecom/Prdm16/Tasor/Tet1	8
Up-regualted	GO:0035019	somatic stem cell population maintenance	8/579	56/29008	1.46804e-05	0.000848638	0.000594934	Bcl9/Braf/Fgfr3/Gata2/Prdm16/Rest/Ski/Vangl2	8
Up-regualted	GO:0072577	endothelial cell apoptotic process	8/579	56/29008	1.46804e-05	0.000848638	0.000594934	Abl1/Angpt1/Bmpr2/Braf/Col18a1/Gata2/Gata3/Tert	8
Up-regualted	GO:1904705	regulation of vascular associated smooth muscle cell proliferation	8/579	61/29008	2.78883e-05	0.0013408	0.000939965	Camk2d/Cdkn1a/Frs2/Gna13/Jun/Mef2c/Prkg1/Tert	8
Up-regualted	GO:1990874	vascular associated smooth muscle cell proliferation	8/579	62/29008	3.14657e-05	0.00146839	0.00102941	Camk2d/Cdkn1a/Frs2/Gna13/Jun/Mef2c/Prkg1/Tert	8
Up-regualted	GO:0014911	positive regulation of smooth muscle cell migration	8/579	63/29008	3.54189e-05	0.00152082	0.00106616	Bcl2/Camk2d/Dock4/Egr1/Iqgap1/Nox4/Pde4d/Tert	8
Up-regualted	GO:0003143	embryonic heart tube morphogenesis	8/579	69/29008	6.8871e-05	0.00222908	0.00156269	Kdm2a/Mef2c/Mib1/Nphp3/Pkd2/Ryr2/Smad3/Vangl2	8
Up-regualted	GO:1902895	positive regulation of pri-miRNA transcription by RNA polymerase II	8/579	69/29008	6.8871e-05	0.00222908	0.00156269	Egr1/Gata2/Gata3/Jun/Mrtfa/Smad3/Stat3/Tert	8
Up-regualted	GO:0060968	regulation of gene silencing	8/579	74/29008	0.000113786	0.00308705	0.00216416	Atf7ip/Mecp2/Pum1/Stat3/Tasor/Tert/Tet1/Zfp36	8
Up-regualted	GO:0045669	positive regulation of osteoblast differentiation	8/579	77/29008	0.000150783	0.00369814	0.00259256	Acvr2b/Bmpr2/Ccn1/Mef2c/Runx2/Smad5/Suco/Zhx3	8
Up-regualted	GO:0008543	fibroblast growth factor receptor signaling pathway	8/579	78/29008	0.000165119	0.0039311	0.00275588	Fgfr3/Frs2/Gata3/Iqgap1/Ndst1/Runx2/Setx/Spry1	8
Up-regualted	GO:0014855	striated muscle cell proliferation	8/579	82/29008	0.000234139	0.00497621	0.00348855	Angpt1/Foxp1/Mef2c/Meis1/Six5/Stat3/Tenm4/Vgll4	8
Up-regualted	GO:0035050	embryonic heart tube development	8/579	91/29008	0.000477582	0.00832742	0.0058379	Kdm2a/Mef2c/Mib1/Nphp3/Pkd2/Ryr2/Smad3/Vangl2	8
Up-regualted	GO:0043367	CD4-positive, alpha-beta T cell differentiation	8/579	92/29008	0.00051408	0.00871449	0.00610926	Braf/Foxp1/Gata3/Irf1/Nfkbid/Rc3h2/Stat3/Tox	8
Up-regualted	GO:0043535	regulation of blood vessel endothelial cell migration	8/579	93/29008	0.000552803	0.00903459	0.00633366	Abl1/Angpt1/Gata2/Hdac9/Mecp2/Mef2c/Pik3c2a/Vash1	8
Up-regualted	GO:0033077	T cell differentiation in thymus	8/579	95/29008	0.000637326	0.00990821	0.00694611	Bcl2/Dock2/Gata3/Nfkbid/Ptprc/Tox/Zfp608/Zfp609	8
Up-regualted	GO:0001938	positive regulation of endothelial cell proliferation	8/579	99/29008	0.000837624	0.0120229	0.00842863	Bmpr2/Fgfr3/Gata2/Gdf2/Jun/Nr4a1/Rictor/Stat3	8
Up-regualted	GO:0050795	regulation of behavior	8/579	101/29008	0.000955172	0.0128883	0.0090353	Dgat1/Dlg4/Mbd5/Mecp2/Mef2c/Shank3/Stat3/Zfhx3	8
Up-regualted	GO:0060021	roof of mouth development	8/579	101/29008	0.000955172	0.0128883	0.0090353	Acvr2b/Gdf11/Mef2c/Mmp25/Prdm16/Ski/Tiparp/Zfp950	8
Up-regualted	GO:0060993	kidney morphogenesis	8/579	101/29008	0.000955172	0.0128883	0.0090353	Bcl2/Eya1/Gata3/Gcnt4/Lama5/Nphp3/Pbx1/Vangl2	8
Up-regualted	GO:0060395	SMAD protein signal transduction	8/579	102/29008	0.0010187	0.0135832	0.00952246	Bmpr2/Gdf11/Gdf2/Jun/Pbld2/Ski/Smad3/Smad5	8
Up-regualted	GO:0007173	epidermal growth factor receptor signaling pathway	8/579	103/29008	0.00108557	0.014181	0.00994152	Abl1/Braf/Btc/Cblb/Hip1r/Iqgap1/Plaur/Rassf2	8
Up-regualted	GO:0003300	cardiac muscle hypertrophy	8/579	104/29008	0.00115589	0.0147029	0.0103074	Akap13/Camk2d/Col14a1/Foxp1/Mef2c/Ryr2/Smad3/Tnfrsf1b	8
Up-regualted	GO:0014074	response to purine-containing compound	8/579	105/29008	0.0012298	0.015	0.0105157	Itpr1/P2rx2/Pde4d/Per1/Pik3cg/Pkd2/Plcg2/Ryr2	8
Up-regualted	GO:0046849	bone remodeling	8/579	105/29008	0.0012298	0.015	0.0105157	Fgfr3/Inpp5d/Itgav/Lrrk1/Nox4/Rassf2/Snx10/Suco	8
Up-regualted	GO:0048661	positive regulation of smooth muscle cell proliferation	8/579	105/29008	0.0012298	0.015	0.0105157	Camk2d/Egr1/Foxp1/Frs2/Jun/Pde4d/Ppargc1a/Tert	8
Up-regualted	GO:0030101	natural killer cell activation	8/579	106/29008	0.00130743	0.0157145	0.0110166	Clnk/Elf4/Irf1/Lyst/Pbx1/Pglyrp2/Ptprc/Tox	8
Up-regualted	GO:0061326	renal tubule development	8/579	106/29008	0.00130743	0.0157145	0.0110166	Bcl2/Eya1/Gata3/Lama5/Mef2c/Pbx1/Pkd2/Ttc8	8
Up-regualted	GO:0014897	striated muscle hypertrophy	8/579	108/29008	0.00147435	0.0170583	0.0119587	Akap13/Camk2d/Col14a1/Foxp1/Mef2c/Ryr2/Smad3/Tnfrsf1b	8
Up-regualted	GO:0090263	positive regulation of canonical Wnt signaling pathway	8/579	108/29008	0.00147435	0.0170583	0.0119587	Csnk1g1/Disc1/Eda/Fgfr3/Lmx1a/Lrrk1/Smad3/Wls	8
Up-regualted	GO:0014896	muscle hypertrophy	8/579	110/29008	0.00165774	0.0186444	0.0130706	Akap13/Camk2d/Col14a1/Foxp1/Mef2c/Ryr2/Smad3/Tnfrsf1b	8
Up-regualted	GO:0002367	cytokine production involved in immune response	8/579	111/29008	0.00175596	0.0194173	0.0136124	Angpt1/Arid5a/Clnk/Gata3/Il18rap/Lilrb4b/Plcg2/Tnfrsf1b	8
Up-regualted	GO:0010522	regulation of calcium ion transport into cytosol	8/579	111/29008	0.00175596	0.0194173	0.0136124	Abl1/Bcl2/Camk2d/Lhcgr/Pde4d/Pkd2/Ramp3/Ryr2	8
Up-regualted	GO:1901989	positive regulation of cell cycle phase transition	8/579	111/29008	0.00175596	0.0194173	0.0136124	Camk2d/Klhl18/Mecp2/Pbx1/Plcg2/Stxbp4/Tert/Tmod3	8
Up-regualted	GO:0038127	ERBB signaling pathway	8/579	113/29008	0.00196617	0.0208323	0.0146044	Abl1/Braf/Btc/Cblb/Hip1r/Iqgap1/Plaur/Rassf2	8
Up-regualted	GO:0055017	cardiac muscle tissue growth	8/579	113/29008	0.00196617	0.0208323	0.0146044	Akap13/Camk2d/Col14a1/Foxp1/Mef2c/Meis1/Tenm4/Vgll4	8
Up-regualted	GO:0001892	embryonic placenta development	8/579	114/29008	0.00207844	0.0216683	0.0151905	Birc6/Ccn1/Gata2/Itgav/Junb/Pkd2/Socs3/Vash1	8
Up-regualted	GO:0032231	regulation of actin filament bundle assembly	8/579	114/29008	0.00207844	0.0216683	0.0151905	Abl1/Arap1/Braf/Nox4/Ppp1r9a/Shank3/Smad3/Ttc8	8
Up-regualted	GO:0019751	polyol metabolic process	8/579	115/29008	0.0021957	0.0223075	0.0156386	Grk3/Inpp1/Itpk1/Itpkc/Lhcgr/Mecp2/Plcg2/Slc5a3	8
Up-regualted	GO:0030038	contractile actin filament bundle assembly	8/579	115/29008	0.0021957	0.0223075	0.0156386	Abl1/Arap1/Braf/Nox4/Ppp1r9a/Smad3/Spag6l/Ttc8	8
Up-regualted	GO:0043149	stress fiber assembly	8/579	115/29008	0.0021957	0.0223075	0.0156386	Abl1/Arap1/Braf/Nox4/Ppp1r9a/Smad3/Spag6l/Ttc8	8
Up-regualted	GO:0042100	B cell proliferation	8/579	117/29008	0.00244577	0.0236783	0.0165996	Abl1/Bcl2/Cdkn1a/Clcf1/Inpp5d/Mef2c/Pkn1/Ptprc	8
Up-regualted	GO:0043401	steroid hormone mediated signaling pathway	8/579	117/29008	0.00244577	0.0236783	0.0165996	Akap13/Clock/Foxp1/Kmt2d/Ncoa2/Per1/Trerf1/Trim68	8
Up-regualted	GO:0022404	molting cycle process	8/579	119/29008	0.0027176	0.0254878	0.0178681	Acvr1b/Bcl2/Dkk1/Eda/Farp2/Fzd3/Lama5/Vangl2	8
Up-regualted	GO:0022405	hair cycle process	8/579	119/29008	0.0027176	0.0254878	0.0178681	Acvr1b/Bcl2/Dkk1/Eda/Farp2/Fzd3/Lama5/Vangl2	8
Up-regualted	GO:0045666	positive regulation of neuron differentiation	8/579	119/29008	0.0027176	0.0254878	0.0178681	Arhgef2/Dkk1/Dnmt3b/Etv5/Gata2/Lmx1a/Mef2c/Rest	8
Up-regualted	GO:0030282	bone mineralization	8/579	123/29008	0.00333164	0.0289443	0.0202913	Acvr2b/Bmpr2/Ccn1/Fgfr3/Mef2c/Sbno2/Smad3/Snx10	8
Up-regualted	GO:0031398	positive regulation of protein ubiquitination	8/579	123/29008	0.00333164	0.0289443	0.0202913	Angpt1/Cblb/Fgfr3/Huwe1/Kdm2a/Mapk8/Mycbp2/Rnf180	8
Up-regualted	GO:0032649	regulation of interferon-gamma production	8/579	123/29008	0.00333164	0.0289443	0.0202913	Abl1/Arid5a/Cd274/Gata3/Il12rb2/Lilrb4b/Pde4d/Pglyrp2	8
Up-regualted	GO:0042476	odontogenesis	8/579	123/29008	0.00333164	0.0289443	0.0202913	Acvr2b/Ankrd11/Cd34/Eda/Lama5/Nfic/Runx2/Snx10	8
Up-regualted	GO:0060419	heart growth	8/579	123/29008	0.00333164	0.0289443	0.0202913	Akap13/Camk2d/Col14a1/Foxp1/Mef2c/Meis1/Tenm4/Vgll4	8
Up-regualted	GO:0060996	dendritic spine development	8/579	128/29008	0.00424467	0.0337862	0.0236857	Abi2/Disc1/Dlg4/Mecp2/Mef2c/Nlgn2/Ppp1r9a/Shank3	8
Up-regualted	GO:0003279	cardiac septum development	8/579	130/29008	0.00465948	0.0351734	0.0246581	Bmpr2/Ccn1/Frs2/Gata3/Ndst1/Nphp3/Slit2/Vangl2	8
Up-regualted	GO:0043406	positive regulation of MAP kinase activity	8/579	130/29008	0.00465948	0.0351734	0.0246581	Akap13/Dkk1/Iqgap1/Map3k12/Nox4/Pik3cg/Ptprc/Vangl2	8
Up-regualted	GO:0050868	negative regulation of T cell activation	8/579	131/29008	0.0048782	0.0363095	0.0254546	Cblb/Cd274/Irf1/Lilrb4b/Nfkbid/Rc3h2/Zc3h12d/Zfp608	8
Up-regualted	GO:0003158	endothelium development	8/579	133/29008	0.00533915	0.0385977	0.0270588	Acvr2b/Bmpr2/Col18a1/Foxp1/Gdf2/Kdm6b/Marveld2/Pde4d	8
Up-regualted	GO:0032273	positive regulation of protein polymerization	8/579	134/29008	0.00558173	0.0393409	0.0275797	Abi2/Fchsd2/Hip1r/Mapk8/Mecp2/Nav3/Rictor/Slain1	8
Up-regualted	GO:0010811	positive regulation of cell-substrate adhesion	8/579	139/29008	0.00692286	0.0450371	0.0315731	Abl1/Braf/Ccn1/Disc1/Iqgap1/Rreb1/Smad3/Utrn	8
Up-regualted	GO:0035270	endocrine system development	8/579	141/29008	0.00752251	0.0473137	0.0331691	Braf/Clock/Gata2/Gata3/Pbx1/Rfx3/Smad3/Zbed6	8
Up-regualted	GO:0001508	action potential	8/579	143/29008	0.00816043	0.0490418	0.0343805	Camk2d/Chrnb4/Foxp1/Kcnh2/Kcnj2/Mecp2/P2rx2/Ryr2	8
Up-regualted	GO:0030218	erythrocyte differentiation	8/579	143/29008	0.00816043	0.0490418	0.0343805	Acvr1b/Gata2/Gata3/Inpp5d/Smad5/Stat3/Tmod3/Zfp36	8
Up-regualted	GO:0046633	alpha-beta T cell proliferation	7/579	43/29008	2.10317e-05	0.00111988	0.000785087	Cblb/Cd274/Dock2/Elf4/Irf1/Ptprc/Rasal3	7
Up-regualted	GO:0046854	phosphatidylinositol phosphate biosynthetic process	7/579	46/29008	3.31734e-05	0.00150711	0.00105655	Inpp1/Itpkc/Pik3c2a/Pik3c2g/Pik3cg/Smg1/Socs3	7
Up-regualted	GO:2000351	regulation of endothelial cell apoptotic process	7/579	53/29008	8.46905e-05	0.00257293	0.00180374	Abl1/Angpt1/Braf/Col18a1/Gata2/Gata3/Tert	7
Up-regualted	GO:0045058	T cell selection	7/579	58/29008	0.0001516	0.00369814	0.00259256	Bcl2/Braf/Dock2/Gata3/Ptprc/Stat3/Tox	7
Up-regualted	GO:0045778	positive regulation of ossification	7/579	58/29008	0.0001516	0.00369814	0.00259256	Acvr2b/Bmpr2/Ccn1/Fgfr3/Mef2c/Runx2/Smad3	7
Up-regualted	GO:0001947	heart looping	7/579	62/29008	0.000231516	0.00494167	0.00346434	Kdm2a/Mef2c/Mib1/Nphp3/Pkd2/Smad3/Vangl2	7
Up-regualted	GO:0001707	mesoderm formation	7/579	66/29008	0.000342331	0.00659399	0.00462269	Bmpr2/Dkk1/Exoc4/Eya1/Kdm6b/Smad3/Wls	7
Up-regualted	GO:0061371	determination of heart left/right asymmetry	7/579	68/29008	0.000411793	0.00751507	0.00526841	Kdm2a/Mef2c/Mib1/Nphp3/Pkd2/Smad3/Vangl2	7
Up-regualted	GO:0030239	myofibril assembly	7/579	69/29008	0.00045051	0.00793923	0.00556576	Akap13/Foxp1/Mef2c/Mybpc3/Neb/Plec/Tmod3	7
Up-regualted	GO:0055002	striated muscle cell development	7/579	69/29008	0.00045051	0.00793923	0.00556576	Akap13/Foxp1/Mef2c/Mybpc3/Neb/Plec/Tmod3	7
Up-regualted	GO:0048332	mesoderm morphogenesis	7/579	70/29008	0.000492076	0.00846097	0.00593153	Bmpr2/Dkk1/Exoc4/Eya1/Kdm6b/Smad3/Wls	7
Up-regualted	GO:0030888	regulation of B cell proliferation	7/579	71/29008	0.00053664	0.00888098	0.00622597	Bcl2/Cdkn1a/Clcf1/Inpp5d/Mef2c/Pkn1/Ptprc	7
Up-regualted	GO:0048678	response to axon injury	7/579	72/29008	0.000584356	0.00933461	0.00654399	Bcl2/Braf/Fgfr3/Jun/Plcg2/Tnc/Xylt1	7
Up-regualted	GO:0007492	endoderm development	7/579	75/29008	0.000748006	0.0112108	0.00785929	Angpt1/Dkk1/Dusp2/Dusp4/Dusp5/Itgav/Smad3	7
Up-regualted	GO:0061097	regulation of protein tyrosine kinase activity	7/579	77/29008	0.000875859	0.0123922	0.00868747	Btc/Cblb/Dlg4/Lilrb4b/Nox4/Ptprc/Stap1	7
Up-regualted	GO:0002292	T cell differentiation involved in immune response	7/579	78/29008	0.000945932	0.0128883	0.0090353	Clec4e/Foxp1/Gata3/Irf1/Nfkbid/Rc3h2/Stat3	7
Up-regualted	GO:0045638	negative regulation of myeloid cell differentiation	7/579	87/29008	0.00179482	0.0196636	0.0137851	Gata2/Hoxa9/Inpp5d/Lilrb4b/Meis1/Prdm16/Zfp36	7
Up-regualted	GO:0061333	renal tubule morphogenesis	7/579	87/29008	0.00179482	0.0196636	0.0137851	Bcl2/Eya1/Gata3/Lama5/Mef2c/Pbx1/Pkd2	7
Up-regualted	GO:0046683	response to organophosphorus	7/579	89/29008	0.00204562	0.0214617	0.0150456	Itpr1/P2rx2/Pde4d/Per1/Pik3cg/Pkd2/Plcg2	7
Up-regualted	GO:0045665	negative regulation of neuron differentiation	7/579	90/29008	0.00218076	0.0223075	0.0156386	Gdf11/Hmg20a/Lmx1a/Meis1/Mib1/Pbx1/Rest	7
Up-regualted	GO:0001656	metanephros development	7/579	91/29008	0.00232269	0.0231895	0.0162569	Bcl2/Egr1/Eya1/Gata3/Gdf11/Slit2/Spry1	7
Up-regualted	GO:0031016	pancreas development	7/579	91/29008	0.00232269	0.0231895	0.0162569	Acvr2b/Clock/Gdf11/Nphp3/Rfx3/Wls/Zbed6	7
Up-regualted	GO:0043242	negative regulation of protein-containing complex disassembly	7/579	91/29008	0.00232269	0.0231895	0.0162569	Arhgef2/Hdgfl3/Nav3/Scaf8/Svil/Taok1/Tmod3	7
Up-regualted	GO:0002718	regulation of cytokine production involved in immune response	7/579	97/29008	0.00332957	0.0289443	0.0202913	Angpt1/Arid5a/Clnk/Gata3/Lilrb4b/Plcg2/Tnfrsf1b	7
Up-regualted	GO:0010389	regulation of G2/M transition of mitotic cell cycle	7/579	97/29008	0.00332957	0.0289443	0.0202913	Camk2d/Cdkn1a/Fhl4/Gpr132/Mecp2/Pbx1/Taok1	7
Up-regualted	GO:0032091	negative regulation of protein binding	7/579	98/29008	0.00352543	0.0301519	0.0211378	Atp2a3/Cdkn1a/Disc1/Dkk1/Mapk8/Mecp2/Pim2	7
Up-regualted	GO:0051492	regulation of stress fiber assembly	7/579	98/29008	0.00352543	0.0301519	0.0211378	Abl1/Arap1/Braf/Nox4/Ppp1r9a/Smad3/Ttc8	7
Up-regualted	GO:0006476	protein deacetylation	7/579	102/29008	0.00439775	0.0338033	0.0236977	Baz2a/Hdac9/Ndst1/Per1/Rest/Smarcad1/Trerf1	7
Up-regualted	GO:0045582	positive regulation of T cell differentiation	7/579	104/29008	0.00489064	0.0363095	0.0254546	Gata3/Il1rl2/Irf1/Lilrb4b/Nfkbid/Ptprc/Zfp609	7
Up-regualted	GO:0051153	regulation of striated muscle cell differentiation	7/579	104/29008	0.00489064	0.0363095	0.0254546	Bcl2/Dkk1/Foxp1/Frs2/Hdac9/Mef2c/Sik1	7
Up-regualted	GO:0055013	cardiac muscle cell development	7/579	104/29008	0.00489064	0.0363095	0.0254546	Akap13/Alpk3/Camk2d/Col14a1/Foxp1/Neb/Plec	7
Up-regualted	GO:1902749	regulation of cell cycle G2/M phase transition	7/579	105/29008	0.00515213	0.0374879	0.0262807	Camk2d/Cdkn1a/Fhl4/Gpr132/Mecp2/Pbx1/Taok1	7
Up-regualted	GO:0031058	positive regulation of histone modification	7/579	108/29008	0.00599974	0.0409797	0.0287286	Arid5a/Dnmt3b/Gata3/Kdm2a/Lcor/Mecp2/Tet1	7
Up-regualted	GO:0048145	regulation of fibroblast proliferation	7/579	108/29008	0.00599974	0.0409797	0.0287286	Abl1/Btc/Cdkn1a/Fosl2/Jun/Kmt2c/Ski	7
Up-regualted	GO:0030518	intracellular steroid hormone receptor signaling pathway	7/579	110/29008	0.00661994	0.0439436	0.0308065	Clock/Foxp1/Kmt2d/Ncoa2/Per1/Trerf1/Trim68	7
Up-regualted	GO:0031532	actin cytoskeleton reorganization	7/579	110/29008	0.00661994	0.0439436	0.0308065	Abl1/Cdc42bpg/Farp2/Plec/Rictor/Stap1/Thsd7b	7
Up-regualted	GO:0032760	positive regulation of tumor necrosis factor production	7/579	110/29008	0.00661994	0.0439436	0.0308065	Arhgef2/Arid5a/Oas1c/Oas3/Plcg2/Ptprc/Stat3	7
Up-regualted	GO:0055006	cardiac cell development	7/579	110/29008	0.00661994	0.0439436	0.0308065	Akap13/Alpk3/Camk2d/Col14a1/Foxp1/Neb/Plec	7
Up-regualted	GO:0048144	fibroblast proliferation	7/579	111/29008	0.00694732	0.0450371	0.0315731	Abl1/Btc/Cdkn1a/Fosl2/Jun/Kmt2c/Ski	7
Up-regualted	GO:1903557	positive regulation of tumor necrosis factor superfamily cytokine production	7/579	112/29008	0.00728656	0.0465588	0.0326398	Arhgef2/Arid5a/Oas1c/Oas3/Plcg2/Ptprc/Stat3	7
Up-regualted	GO:0035601	protein deacylation	7/579	114/29008	0.00800161	0.0486765	0.0341245	Baz2a/Hdac9/Ndst1/Per1/Rest/Smarcad1/Trerf1	7
Up-regualted	GO:0098732	macromolecule deacylation	7/579	114/29008	0.00800161	0.0486765	0.0341245	Baz2a/Hdac9/Ndst1/Per1/Rest/Smarcad1/Trerf1	7
Up-regualted	GO:0060065	uterus development	6/579	26/29008	1.00969e-05	0.000678366	0.000475566	Ash1l/Gata3/Hoxa10/Hoxa9/Kdm5b/Lhcgr	6
Up-regualted	GO:0032703	negative regulation of interleukin-2 production	6/579	27/29008	1.27634e-05	0.000790054	0.000553864	Cd34/Gata3/Lilrb4b/Nav3/Ptprc/Zfp36	6
Up-regualted	GO:1904752	regulation of vascular associated smooth muscle cell migration	6/579	30/29008	2.43331e-05	0.00122957	0.000861982	Dock4/Gna13/Iqgap1/Mef2c/Prkg1/Tert	6
Up-regualted	GO:2000352	negative regulation of endothelial cell apoptotic process	6/579	31/29008	2.96663e-05	0.00141257	0.000990277	Abl1/Angpt1/Braf/Gata2/Gata3/Tert	6
Up-regualted	GO:1904738	vascular associated smooth muscle cell migration	6/579	32/29008	3.58993e-05	0.00152082	0.00106616	Dock4/Gna13/Iqgap1/Mef2c/Prkg1/Tert	6
Up-regualted	GO:0033687	osteoblast proliferation	6/579	33/29008	4.31405e-05	0.00175108	0.00122759	Abl1/Bcl2/Ccn1/Itgav/Junb/Smad3	6
Up-regualted	GO:0036037	CD8-positive, alpha-beta T cell activation	6/579	34/29008	5.15061e-05	0.00186174	0.00130516	Bcl2/Cd274/Irf1/Lilrb4b/Tox/Wdfy4	6
Up-regualted	GO:0043368	positive T cell selection	6/579	41/29008	0.000152993	0.00371383	0.00260356	Bcl2/Braf/Dock2/Ptprc/Stat3/Tox	6
Up-regualted	GO:0030501	positive regulation of bone mineralization	6/579	42/29008	0.000175506	0.00409514	0.00287088	Acvr2b/Bmpr2/Ccn1/Fgfr3/Mef2c/Smad3	6
Up-regualted	GO:0031507	heterochromatin assembly	6/579	44/29008	0.000228341	0.004895	0.00343162	Atf7ip/Baz2a/Dnmt3a/Dnmt3b/Tasor/Tet1	6
Up-regualted	GO:0060323	head morphogenesis	6/579	46/29008	0.000292952	0.00588576	0.00412619	Ankrd11/Braf/Dkk1/Ski/Tiparp/Zfp950	6
Up-regualted	GO:0048536	spleen development	6/579	47/29008	0.000330217	0.00646749	0.00453401	Abl1/Bcl2/Cdh17/Pbx1/Pkn1/Rc3h2	6
Up-regualted	GO:0016601	Rac protein signal transduction	6/579	49/29008	0.000415818	0.00751507	0.00526841	Abi2/Camk2d/Dock2/Elmo1/Farp2/Pik3cg	6
Up-regualted	GO:0043124	negative regulation of I-kappaB kinase/NF-kappaB signaling	6/579	49/29008	0.000415818	0.00751507	0.00526841	Abl1/Ash1l/Lilrb4b/Mapkbp1/Nfkbid/Per1	6
Up-regualted	GO:0045214	sarcomere organization	6/579	49/29008	0.000415818	0.00751507	0.00526841	Akap13/Foxp1/Mef2c/Mybpc3/Neb/Plec	6
Up-regualted	GO:0030901	midbrain development	6/579	50/29008	0.00046464	0.00813039	0.00569977	Dkk1/Fgfr3/Fzd3/Lmx1a/Ndst1/Wls	6
Up-regualted	GO:0032350	regulation of hormone metabolic process	6/579	51/29008	0.000517814	0.00871449	0.00610926	Egr1/Gata3/H6pd/Lhcgr/Ppargc1a/Rest	6
Up-regualted	GO:0045814	negative regulation of gene expression, epigenetic	6/579	52/29008	0.000575602	0.00922453	0.00646682	Atf7ip/Baz2a/Dnmt3a/Dnmt3b/Tasor/Tet1	6
Up-regualted	GO:0070169	positive regulation of biomineral tissue development	6/579	52/29008	0.000575602	0.00922453	0.00646682	Acvr2b/Bmpr2/Ccn1/Fgfr3/Mef2c/Smad3	6
Up-regualted	GO:1904036	negative regulation of epithelial cell apoptotic process	6/579	52/29008	0.000575602	0.00922453	0.00646682	Abl1/Angpt1/Braf/Gata2/Gata3/Tert	6
Up-regualted	GO:0002042	cell migration involved in sprouting angiogenesis	6/579	53/29008	0.000638271	0.00990821	0.00694611	Abl1/Gata2/Hdac9/Nr4a1/Pik3c2a/Slit2	6
Up-regualted	GO:0110151	positive regulation of biomineralization	6/579	53/29008	0.000638271	0.00990821	0.00694611	Acvr2b/Bmpr2/Ccn1/Fgfr3/Mef2c/Smad3	6
Up-regualted	GO:0043647	inositol phosphate metabolic process	6/579	57/29008	0.000943402	0.0128883	0.0090353	Grk3/Inpp1/Itpk1/Itpkc/Lhcgr/Plcg2	6
Up-regualted	GO:0050732	negative regulation of peptidyl-tyrosine phosphorylation	6/579	57/29008	0.000943402	0.0128883	0.0090353	Cblb/Irf1/Lilrb4b/Lrrk1/Ptprc/Socs3	6
Up-regualted	GO:0003170	heart valve development	6/579	59/29008	0.00113277	0.014608	0.0102408	Bmpr2/Ccn1/Gata3/Mef2c/Slit2/Tnfrsf1b	6
Up-regualted	GO:0045620	negative regulation of lymphocyte differentiation	6/579	61/29008	0.00134995	0.0161473	0.01132	Irf1/Lilrb4b/Nfkbid/Pglyrp2/Rc3h2/Zfp608	6
Up-regualted	GO:0060324	face development	6/579	61/29008	0.00134995	0.0161473	0.01132	Ankrd11/Braf/Dkk1/Ski/Tiparp/Zfp950	6
Up-regualted	GO:0001960	negative regulation of cytokine-mediated signaling pathway	6/579	62/29008	0.00146979	0.0170583	0.0119587	Nlrc5/Oas1c/Oas3/Ptprc/Slit2/Stap1	6
Up-regualted	GO:0010171	body morphogenesis	6/579	62/29008	0.00146979	0.0170583	0.0119587	Ankrd11/Braf/Dkk1/Ski/Tiparp/Zfp950	6
Up-regualted	GO:0048008	platelet-derived growth factor receptor signaling pathway	6/579	64/29008	0.00173358	0.0193349	0.0135547	Abl1/Cblb/Hip1r/Iqgap1/Tiparp/Zfp950	6
Up-regualted	GO:0051148	negative regulation of muscle cell differentiation	6/579	65/29008	0.00187822	0.0203522	0.0142678	Bmpr2/Dkk1/Foxp1/Frs2/Mecp2/Zbed6	6
Up-regualted	GO:0070988	demethylation	6/579	65/29008	0.00187822	0.0203522	0.0142678	Gata3/Kdm2a/Kdm5b/Kdm6b/Tet1/Tox	6
Up-regualted	GO:0060761	negative regulation of response to cytokine stimulus	6/579	66/29008	0.00203181	0.021362	0.0149758	Nlrc5/Oas1c/Oas3/Ptprc/Slit2/Stap1	6
Up-regualted	GO:0007585	respiratory gaseous exchange by respiratory system	6/579	68/29008	0.00236724	0.023538	0.0165012	Cfap54/Mecp2/Ndst1/Nlgn2/Slc5a3/Spag6l	6
Up-regualted	GO:0042093	T-helper cell differentiation	6/579	69/29008	0.00254978	0.0242818	0.0170226	Foxp1/Gata3/Irf1/Nfkbid/Rc3h2/Stat3	6
Up-regualted	GO:0099601	regulation of neurotransmitter receptor activity	6/579	69/29008	0.00254978	0.0242818	0.0170226	Dlg4/Klhl24/Mef2c/Nlgn2/Ppargc1a/Shank3	6
Up-regualted	GO:0002294	CD4-positive, alpha-beta T cell differentiation involved in immune response	6/579	70/29008	0.00274269	0.0255778	0.0179312	Foxp1/Gata3/Irf1/Nfkbid/Rc3h2/Stat3	6
Up-regualted	GO:0048146	positive regulation of fibroblast proliferation	6/579	70/29008	0.00274269	0.0255778	0.0179312	Abl1/Btc/Cdkn1a/Fosl2/Jun/Kmt2c	6
Up-regualted	GO:0048662	negative regulation of smooth muscle cell proliferation	6/579	70/29008	0.00274269	0.0255778	0.0179312	Bmpr2/Cdkn1a/Gna13/Mef2c/Ppargc1a/Prkg1	6
Up-regualted	GO:0002293	alpha-beta T cell differentiation involved in immune response	6/579	71/29008	0.00294633	0.0271698	0.0190473	Foxp1/Gata3/Irf1/Nfkbid/Rc3h2/Stat3	6
Up-regualted	GO:0002287	alpha-beta T cell activation involved in immune response	6/579	72/29008	0.00316105	0.0283578	0.0198801	Foxp1/Gata3/Irf1/Nfkbid/Rc3h2/Stat3	6
Up-regualted	GO:0007405	neuroblast proliferation	6/579	72/29008	0.00316105	0.0283578	0.0198801	Arhgef2/Disc1/Frs2/Fzd3/Mapk8/Numbl	6
Up-regualted	GO:0098586	cellular response to virus	6/579	72/29008	0.00316105	0.0283578	0.0198801	Ikbke/Oas3/Pou2f2/Pum1/Smad3/Wdfy4	6
Up-regualted	GO:0016575	histone deacetylation	6/579	78/29008	0.00470287	0.035393	0.0248121	Baz2a/Hdac9/Per1/Rest/Smarcad1/Trerf1	6
Up-regualted	GO:0061180	mammary gland epithelium development	6/579	78/29008	0.00470287	0.035393	0.0248121	Etv5/Gata3/Kdm5b/Rreb1/Slit2/Vdr	6
Up-regualted	GO:0033143	regulation of intracellular steroid hormone receptor signaling pathway	6/579	79/29008	0.00500554	0.0369962	0.025936	Clock/Foxp1/Kmt2d/Ncoa2/Per1/Trim68	6
Up-regualted	GO:0051057	positive regulation of small GTPase mediated signal transduction	6/579	79/29008	0.00500554	0.0369962	0.025936	Akap13/Camk2d/Dock2/Itgav/P2ry10b/Pik3cg	6
Up-regualted	GO:1901880	negative regulation of protein depolymerization	6/579	81/29008	0.00565341	0.0393409	0.0275797	Arhgef2/Hdgfl3/Nav3/Svil/Taok1/Tmod3	6
Up-regualted	GO:0051279	regulation of release of sequestered calcium ion into cytosol	6/579	82/29008	0.00599935	0.0409797	0.0287286	Abl1/Camk2d/Lhcgr/Pde4d/Pkd2/Ryr2	6
Up-regualted	GO:0046785	microtubule polymerization	6/579	83/29008	0.00636046	0.0426688	0.0299128	Abl1/Hdgfl3/Mapk8/Mecp2/Nav3/Slain1	6
Up-regualted	GO:0048708	astrocyte differentiation	6/579	83/29008	0.00636046	0.0426688	0.0299128	Abl1/Clcf1/Fgfr3/Mecp2/Mycn/Stat3	6
Up-regualted	GO:0050848	regulation of calcium-mediated signaling	6/579	83/29008	0.00636046	0.0426688	0.0299128	Exoc4/Itpr1/Lhcgr/Nfat5/Nron/Plcg2	6
Up-regualted	GO:0030500	regulation of bone mineralization	6/579	84/29008	0.0067371	0.0445422	0.0312261	Acvr2b/Bmpr2/Ccn1/Fgfr3/Mef2c/Smad3	6
Up-regualted	GO:0050766	positive regulation of phagocytosis	6/579	84/29008	0.0067371	0.0445422	0.0312261	Cd300lf/Dock2/Gata2/Plcg2/Ptprc/Stap1	6
Up-regualted	GO:0060998	regulation of dendritic spine development	6/579	84/29008	0.0067371	0.0445422	0.0312261	Disc1/Mecp2/Mef2c/Nlgn2/Ppp1r9a/Shank3	6
Up-regualted	GO:0031060	regulation of histone methylation	6/579	85/29008	0.00712965	0.045615	0.0319782	Atrx/Dnmt3b/Gata3/Lcor/Mecp2/Tet1	6
Up-regualted	GO:0048041	focal adhesion assembly	6/579	86/29008	0.00753847	0.0473137	0.0331691	Abl1/Bcl2/Iqgap1/Itgav/Smad3/Tesk2	6
Up-regualted	GO:0050779	RNA destabilization	6/579	86/29008	0.00753847	0.0473137	0.0331691	Pum1/Rc3h2/Samd4b/Tnfrsf1b/Zc3h12d/Zfp36	6
Up-regualted	GO:0060113	inner ear receptor cell differentiation	6/579	86/29008	0.00753847	0.0473137	0.0331691	Cux1/Fgfr3/Mycn/Rest/Ttc8/Vangl2	6
Up-regualted	GO:0061515	myeloid cell development	6/579	87/29008	0.00796393	0.0486765	0.0341245	Foxp1/Lrrk1/Meis1/Nbeal2/Slc9b2/Tmod3	6
Up-regualted	GO:0006346	DNA methylation-dependent heterochromatin assembly	5/579	21/29008	4.86204e-05	0.00181586	0.001273	Atf7ip/Dnmt3a/Dnmt3b/Tasor/Tet1	5
Up-regualted	GO:0002089	lens morphogenesis in camera-type eye	5/579	28/29008	0.000209235	0.00462559	0.00324275	Abi2/Fgfr3/Meis1/Pou2f1/Ski	5
Up-regualted	GO:0007274	neuromuscular synaptic transmission	5/579	28/29008	0.000209235	0.00462559	0.00324275	Chrnb4/Erc1/Etv5/Fchsd2/P2rx2	5
Up-regualted	GO:0033688	regulation of osteoblast proliferation	5/579	28/29008	0.000209235	0.00462559	0.00324275	Abl1/Bcl2/Ccn1/Itgav/Smad3	5
Up-regualted	GO:0014912	negative regulation of smooth muscle cell migration	5/579	30/29008	0.000293575	0.00588576	0.00412619	Gna13/Mef2c/Ppargc1a/Prkg1/Slit2	5
Up-regualted	GO:0046885	regulation of hormone biosynthetic process	5/579	30/29008	0.000293575	0.00588576	0.00412619	Egr1/H6pd/Lhcgr/Ppargc1a/Rest	5
Up-regualted	GO:0001779	natural killer cell differentiation	5/579	36/29008	0.000703803	0.0107902	0.00756442	Irf1/Pbx1/Pglyrp2/Ptprc/Tox	5
Up-regualted	GO:0070306	lens fiber cell differentiation	5/579	37/29008	0.000800549	0.0116598	0.00817403	Abi2/Fgfr3/Frs2/Smad3/Spry1	5
Up-regualted	GO:0071514	genetic imprinting	5/579	37/29008	0.000800549	0.0116598	0.00817403	Dnmt3a/Dnmt3b/Kcnq1ot1/Mecp2/Tet1	5
Up-regualted	GO:0090075	relaxation of muscle	5/579	37/29008	0.000800549	0.0116598	0.00817403	Camk2d/Gucy1a1/Kcnj2/Pde4d/Prkg1	5
Up-regualted	GO:0060674	placenta blood vessel development	5/579	38/29008	0.000906873	0.0126147	0.00884348	Ccn1/Junb/Pkd2/Socs3/Vash1	5
Up-regualted	GO:0098751	bone cell development	5/579	38/29008	0.000906873	0.0126147	0.00884348	Foxp1/Lrrk1/Meis1/Nbeal2/Slc9b2	5
Up-regualted	GO:0001706	endoderm formation	5/579	39/29008	0.00102335	0.0135832	0.00952246	Dkk1/Dusp2/Dusp4/Dusp5/Itgav	5
Up-regualted	GO:0001782	B cell homeostasis	5/579	39/29008	0.00102335	0.0135832	0.00952246	Abl1/Bcl2/Mef2c/Pkn1/Rc3h2	5
Up-regualted	GO:0046640	regulation of alpha-beta T cell proliferation	5/579	39/29008	0.00102335	0.0135832	0.00952246	Cblb/Cd274/Irf1/Ptprc/Rasal3	5
Up-regualted	GO:0060325	face morphogenesis	5/579	40/29008	0.00115057	0.0147029	0.0103074	Ankrd11/Dkk1/Ski/Tiparp/Zfp950	5
Up-regualted	GO:0110110	positive regulation of animal organ morphogenesis	5/579	41/29008	0.00128912	0.0155701	0.0109153	Cd34/Dkk1/Frs2/Gata3/Spry1	5
Up-regualted	GO:0032924	activin receptor signaling pathway	5/579	43/29008	0.00160264	0.0180781	0.0126736	Acvr1b/Acvr2b/Gdf2/Ski/Smad3	5
Up-regualted	GO:0048741	skeletal muscle fiber development	5/579	43/29008	0.00160264	0.0180781	0.0126736	Bcl2/Hdac9/P2rx2/Plec/Ski	5
Up-regualted	GO:0001569	branching involved in blood vessel morphogenesis	5/579	45/29008	0.00196881	0.0208323	0.0146044	Abl1/Angpt1/Gdf2/Gna13/Vangl2	5
Up-regualted	GO:0002369	T cell cytokine production	5/579	46/29008	0.00217318	0.0223075	0.0156386	Arid5a/Gata3/Il18rap/Lilrb4b/Tnfrsf1b	5
Up-regualted	GO:0030890	positive regulation of B cell proliferation	5/579	46/29008	0.00217318	0.0223075	0.0156386	Bcl2/Cdkn1a/Clcf1/Mef2c/Ptprc	5
Up-regualted	GO:0031952	regulation of protein autophosphorylation	5/579	46/29008	0.00217318	0.0223075	0.0156386	Iqgap1/Jun/Mob1b/Ptprc/Rassf2	5
Up-regualted	GO:0014904	myotube cell development	5/579	47/29008	0.00239258	0.0236722	0.0165953	Bcl2/Hdac9/P2rx2/Plec/Ski	5
Up-regualted	GO:0003179	heart valve morphogenesis	5/579	48/29008	0.00262763	0.0248796	0.0174418	Bmpr2/Ccn1/Gata3/Mef2c/Slit2	5
Up-regualted	GO:0032814	regulation of natural killer cell activation	5/579	49/29008	0.00287898	0.026648	0.0186815	Clnk/Irf1/Lyst/Pglyrp2/Tox	5
Up-regualted	GO:0045646	regulation of erythrocyte differentiation	5/579	50/29008	0.00314724	0.0283578	0.0198801	Acvr1b/Gata2/Inpp5d/Stat3/Zfp36	5
Up-regualted	GO:0061647	histone H3-K9 modification	5/579	50/29008	0.00314724	0.0283578	0.0198801	Atrx/Baz2a/Dnmt3b/Gata3/Mecp2	5
Up-regualted	GO:1903426	regulation of reactive oxygen species biosynthetic process	5/579	50/29008	0.00314724	0.0283578	0.0198801	Abcd2/Pikfyve/Plcg2/Slc5a3/Stat3	5
Up-regualted	GO:0031050	dsRNA processing	5/579	51/29008	0.00343304	0.0295305	0.0207022	Ago1/Mecp2/Pum1/Stat3/Tert	5
Up-regualted	GO:0070918	production of small RNA involved in gene silencing by RNA	5/579	51/29008	0.00343304	0.0295305	0.0207022	Ago1/Mecp2/Pum1/Stat3/Tert	5
Up-regualted	GO:0045581	negative regulation of T cell differentiation	5/579	52/29008	0.00373703	0.0314344	0.0220369	Irf1/Lilrb4b/Nfkbid/Rc3h2/Zfp608	5
Up-regualted	GO:0014014	negative regulation of gliogenesis	5/579	53/29008	0.00405981	0.0325983	0.0228529	Fgfr3/Mecp2/Mycn/Ski/Tert	5
Up-regualted	GO:0021795	cerebral cortex cell migration	5/579	53/29008	0.00405981	0.0325983	0.0228529	Disc1/Efhc1/Slit2/Sun2/Syne2	5
Up-regualted	GO:0031103	axon regeneration	5/579	53/29008	0.00405981	0.0325983	0.0228529	Bcl2/Braf/Jun/Tnc/Xylt1	5
Up-regualted	GO:0060147	regulation of posttranscriptional gene silencing	5/579	53/29008	0.00405981	0.0325983	0.0228529	Mecp2/Pum1/Stat3/Tert/Zfp36	5
Up-regualted	GO:0007019	microtubule depolymerization	5/579	54/29008	0.00440203	0.0338033	0.0236977	Arhgef2/Hdgfl3/Nav3/Nckap5/Taok1	5
Up-regualted	GO:0060966	regulation of gene silencing by RNA	5/579	54/29008	0.00440203	0.0338033	0.0236977	Mecp2/Pum1/Stat3/Tert/Zfp36	5
Up-regualted	GO:0010596	negative regulation of endothelial cell migration	5/579	55/29008	0.00476429	0.0356387	0.0249843	Gdf2/Mecp2/Mef2c/Slit2/Vash1	5
Up-regualted	GO:0048546	digestive tract morphogenesis	5/579	55/29008	0.00476429	0.0356387	0.0249843	Acvr2b/Bcl2/Fgfr3/Smad3/Vangl2	5
Up-regualted	GO:0048701	embryonic cranial skeleton morphogenesis	5/579	55/29008	0.00476429	0.0356387	0.0249843	Mef2c/Ndst1/Runx2/Smad3/Wdr19	5
Up-regualted	GO:2001222	regulation of neuron migration	5/579	55/29008	0.00476429	0.0356387	0.0249843	Arhgef2/Mapk8/Ntng2/Stat3/Zfp609	5
Up-regualted	GO:0032355	response to estradiol	5/579	56/29008	0.00514723	0.0374879	0.0262807	Fosl2/Lcor/Nrip1/Ramp3/Stat3	5
Up-regualted	GO:0043536	positive regulation of blood vessel endothelial cell migration	5/579	56/29008	0.00514723	0.0374879	0.0262807	Abl1/Angpt1/Gata2/Hdac9/Pik3c2a	5
Up-regualted	GO:0048538	thymus development	5/579	56/29008	0.00514723	0.0374879	0.0262807	Abl1/Bcl2/Braf/Gata3/Pbx1	5
Up-regualted	GO:1901861	regulation of muscle tissue development	5/579	56/29008	0.00514723	0.0374879	0.0262807	Bcl2/Hdac9/Mef2c/Ppargc1a/Smad3	5
Up-regualted	GO:0031113	regulation of microtubule polymerization	5/579	57/29008	0.00555144	0.0393409	0.0275797	Abl1/Mapk8/Mecp2/Nav3/Slain1	5
Up-regualted	GO:0010761	fibroblast migration	5/579	58/29008	0.00597754	0.0409797	0.0287286	Braf/Iqgap1/Plec/Spag6l/Syne2	5
Up-regualted	GO:0060443	mammary gland morphogenesis	5/579	59/29008	0.00642613	0.043003	0.0301471	Etv5/Kdm5b/Slit2/Vdr/Zfp157	5
Up-regualted	GO:0051591	response to cAMP	5/579	60/29008	0.00689781	0.0450371	0.0315731	Itpr1/Pde4d/Per1/Pik3cg/Pkd2	5
Up-regualted	GO:0060711	labyrinthine layer development	5/579	60/29008	0.00689781	0.0450371	0.0315731	Birc6/Ccn1/Junb/Socs3/Vash1	5
Up-regualted	GO:0031102	neuron projection regeneration	5/579	61/29008	0.00739315	0.0468875	0.0328703	Bcl2/Braf/Jun/Tnc/Xylt1	5
Up-regualted	GO:0051568	histone H3-K4 methylation	5/579	61/29008	0.00739315	0.0468875	0.0328703	Ash1l/Dnmt3b/Gata3/Kmt2c/Kmt2d	5
Up-regualted	GO:1903409	reactive oxygen species biosynthetic process	5/579	61/29008	0.00739315	0.0468875	0.0328703	Abcd2/Pikfyve/Plcg2/Slc5a3/Stat3	5
Up-regualted	GO:0001736	establishment of planar polarity	5/579	62/29008	0.00791275	0.0486757	0.0341239	Abl1/Fzd3/Spag6l/Ttc8/Vangl2	5
Up-regualted	GO:0042446	hormone biosynthetic process	5/579	62/29008	0.00791275	0.0486757	0.0341239	Egr1/H6pd/Lhcgr/Ppargc1a/Rest	5
Up-regualted	GO:0098900	regulation of action potential	5/579	62/29008	0.00791275	0.0486757	0.0341239	Camk2d/Foxp1/Kcnj2/Mecp2/Ryr2	5
Up-regualted	GO:0070933	histone H4 deacetylation	4/579	11/29008	4.63693e-05	0.00179391	0.00125762	Baz2a/Hdac9/Rest/Smarcad1	4
Up-regualted	GO:0010566	regulation of ketone biosynthetic process	4/579	17/29008	0.000304016	0.00604613	0.00423862	Egr1/H6pd/Ppargc1a/Rest	4
Up-regualted	GO:0043374	CD8-positive, alpha-beta T cell differentiation	4/579	19/29008	0.000479669	0.00833445	0.00584283	Bcl2/Irf1/Lilrb4b/Tox	4
Up-regualted	GO:0006349	regulation of gene expression by genetic imprinting	4/579	20/29008	0.000590171	0.00936707	0.00656674	Dnmt3a/Dnmt3b/Kcnq1ot1/Mecp2	4
Up-regualted	GO:0035584	calcium-mediated signaling using intracellular calcium source	4/579	21/29008	0.000717594	0.0109004	0.00764167	Adgrl1/Ptprc/Ryr2/Selp	4
Up-regualted	GO:0090050	positive regulation of cell migration involved in sprouting angiogenesis	4/579	21/29008	0.000717594	0.0109004	0.00764167	Abl1/Gata2/Hdac9/Pik3c2a	4
Up-regualted	GO:0120255	olefinic compound biosynthetic process	4/579	23/29008	0.00102868	0.0135832	0.00952246	Egr1/H6pd/Ppargc1a/Rest	4
Up-regualted	GO:0032352	positive regulation of hormone metabolic process	4/579	24/29008	0.00121508	0.0149646	0.0104909	Egr1/Gata3/Lhcgr/Ppargc1a	4
Up-regualted	GO:0036303	lymph vessel morphogenesis	4/579	24/29008	0.00121508	0.0149646	0.0104909	Acvr2b/Bmpr2/Svep1/Vash1	4
Up-regualted	GO:0043369	CD4-positive or CD8-positive, alpha-beta T cell lineage commitment	4/579	24/29008	0.00121508	0.0149646	0.0104909	Bcl2/Braf/Stat3/Tox	4
Up-regualted	GO:1901522	positive regulation of transcription from RNA polymerase II promoter involved in cellular response to chemical stimulus	4/579	24/29008	0.00121508	0.0149646	0.0104909	Chd6/Jun/Runx2/Smad5	4
Up-regualted	GO:0060969	negative regulation of gene silencing	4/579	25/29008	0.00142389	0.0169091	0.0118541	Mecp2/Stat3/Tert/Tet1	4
Up-regualted	GO:0003176	aortic valve development	4/579	27/29008	0.00191416	0.020605	0.014445	Bmpr2/Gata3/Slit2/Tnfrsf1b	4
Up-regualted	GO:0033622	integrin activation	4/579	27/29008	0.00191416	0.020605	0.014445	Cdh17/Farp2/Selp/Tln1	4
Up-regualted	GO:0032469	endoplasmic reticulum calcium ion homeostasis	4/579	28/29008	0.00219831	0.0223075	0.0156386	Atp2a3/Bcl2/Camk2d/Itpr1	4
Up-regualted	GO:0045061	thymic T cell selection	4/579	28/29008	0.00219831	0.0223075	0.0156386	Dock2/Gata3/Ptprc/Tox	4
Up-regualted	GO:0045648	positive regulation of erythrocyte differentiation	4/579	28/29008	0.00219831	0.0223075	0.0156386	Acvr1b/Gata2/Inpp5d/Stat3	4
Up-regualted	GO:1904706	negative regulation of vascular associated smooth muscle cell proliferation	4/579	28/29008	0.00219831	0.0223075	0.0156386	Cdkn1a/Gna13/Mef2c/Prkg1	4
Up-regualted	GO:0033081	regulation of T cell differentiation in thymus	4/579	29/29008	0.00251025	0.0239976	0.0168234	Nfkbid/Tox/Zfp608/Zfp609	4
Up-regualted	GO:0006929	substrate-dependent cell migration	4/579	30/29008	0.00285128	0.0264411	0.0185364	Anks1/Ptprc/Slit2/Spag6l	4
Up-regualted	GO:0043153	entrainment of circadian clock by photoperiod	4/579	30/29008	0.00285128	0.0264411	0.0185364	Crtc1/Per1/Rbm4b/Sik1	4
Up-regualted	GO:0001945	lymph vessel development	4/579	31/29008	0.00322268	0.0285487	0.0200139	Acvr2b/Bmpr2/Svep1/Vash1	4
Up-regualted	GO:0002360	T cell lineage commitment	4/579	31/29008	0.00322268	0.0285487	0.0200139	Bcl2/Braf/Stat3/Tox	4
Up-regualted	GO:0007097	nuclear migration	4/579	31/29008	0.00322268	0.0285487	0.0200139	Hook3/Sun2/Syne1/Syne2	4
Up-regualted	GO:0009648	photoperiodism	4/579	31/29008	0.00322268	0.0285487	0.0200139	Crtc1/Per1/Rbm4b/Sik1	4
Up-regualted	GO:0044030	regulation of DNA methylation	4/579	31/29008	0.00322268	0.0285487	0.0200139	Dnmt3a/Kcnq1ot1/Mecp2/Tet1	4
Up-regualted	GO:0061036	positive regulation of cartilage development	4/579	31/29008	0.00322268	0.0285487	0.0200139	Ccn1/Gdf2/Runx2/Smad3	4
Up-regualted	GO:0009649	entrainment of circadian clock	4/579	32/29008	0.00362572	0.0307968	0.02159	Crtc1/Per1/Rbm4b/Sik1	4
Up-regualted	GO:0031116	positive regulation of microtubule polymerization	4/579	32/29008	0.00362572	0.0307968	0.02159	Mapk8/Mecp2/Nav3/Slain1	4
Up-regualted	GO:0048799	animal organ maturation	4/579	32/29008	0.00362572	0.0307968	0.02159	Fgfr3/Gata3/Snx10/Xylt1	4
Up-regualted	GO:0030224	monocyte differentiation	4/579	33/29008	0.00406162	0.0325983	0.0228529	Foxp1/Inpp5d/Jun/Mef2c	4
Up-regualted	GO:1905314	semi-lunar valve development	4/579	33/29008	0.00406162	0.0325983	0.0228529	Bmpr2/Gata3/Slit2/Tnfrsf1b	4
Up-regualted	GO:0010922	positive regulation of phosphatase activity	4/579	34/29008	0.00453159	0.0343652	0.0240916	Mef2c/Ppp1r12a/Ptprc/Smad3	4
Up-regualted	GO:0055075	potassium ion homeostasis	4/579	34/29008	0.00453159	0.0343652	0.0240916	Camk2d/Kcnh2/Slc12a6/Slc12a9	4
Up-regualted	GO:1904707	positive regulation of vascular associated smooth muscle cell proliferation	4/579	34/29008	0.00453159	0.0343652	0.0240916	Camk2d/Frs2/Jun/Tert	4
Up-regualted	GO:2000272	negative regulation of signaling receptor activity	4/579	34/29008	0.00453159	0.0343652	0.0240916	Cblb/Lilrb4b/Ppargc1a/Ramp3	4
Up-regualted	GO:0007026	negative regulation of microtubule depolymerization	4/579	35/29008	0.00503682	0.0371166	0.0260204	Arhgef2/Hdgfl3/Nav3/Taok1	4
Up-regualted	GO:0048710	regulation of astrocyte differentiation	4/579	35/29008	0.00503682	0.0371166	0.0260204	Clcf1/Fgfr3/Mecp2/Mycn	4
Up-regualted	GO:0003401	axis elongation	4/579	36/29008	0.00557845	0.0393409	0.0275797	Spry1/Tmtc3/Tnc/Vangl2	4
Up-regualted	GO:0031112	positive regulation of microtubule polymerization or depolymerization	4/579	36/29008	0.00557845	0.0393409	0.0275797	Mapk8/Mecp2/Nav3/Slain1	4
Up-regualted	GO:0060338	regulation of type I interferon-mediated signaling pathway	4/579	36/29008	0.00557845	0.0393409	0.0275797	Ikbke/Nlrc5/Oas1c/Oas3	4
Up-regualted	GO:0060441	epithelial tube branching involved in lung morphogenesis	4/579	36/29008	0.00557845	0.0393409	0.0275797	Spry1/Tmtc3/Tnc/Vangl2	4
Up-regualted	GO:0002724	regulation of T cell cytokine production	4/579	37/29008	0.00615759	0.0416563	0.029203	Arid5a/Gata3/Lilrb4b/Tnfrsf1b	4
Up-regualted	GO:0051647	nucleus localization	4/579	37/29008	0.00615759	0.0416563	0.029203	Hook3/Sun2/Syne1/Syne2	4
Up-regualted	GO:0031114	regulation of microtubule depolymerization	4/579	38/29008	0.00677532	0.0446756	0.0313197	Arhgef2/Hdgfl3/Nav3/Taok1	4
Up-regualted	GO:0002931	response to ischemia	4/579	39/29008	0.00743269	0.0468875	0.0328703	Bcl2/Egr1/P2rx2/Rest	4
Up-regualted	GO:0032743	positive regulation of interleukin-2 production	4/579	39/29008	0.00743269	0.0468875	0.0328703	Abl1/Pde4d/Plcg2/Ptprc	4
Up-regualted	GO:0051567	histone H3-K9 methylation	4/579	39/29008	0.00743269	0.0468875	0.0328703	Atrx/Baz2a/Dnmt3b/Mecp2	4
Up-regualted	GO:0071320	cellular response to cAMP	4/579	39/29008	0.00743269	0.0468875	0.0328703	Itpr1/Pde4d/Pik3cg/Pkd2	4
Up-regualted	GO:0090049	regulation of cell migration involved in sprouting angiogenesis	4/579	39/29008	0.00743269	0.0468875	0.0328703	Abl1/Gata2/Hdac9/Pik3c2a	4
Up-regualted	GO:1902949	positive regulation of tau-protein kinase activity	3/579	6/29008	0.000151277	0.00369814	0.00259256	Dkk1/Egr1/Nab2	3
Up-regualted	GO:0036092	phosphatidylinositol-3-phosphate biosynthetic process	3/579	8/29008	0.000411094	0.00751507	0.00526841	Pik3c2a/Pik3c2g/Pik3cg	3
Up-regualted	GO:0035022	positive regulation of Rac protein signal transduction	3/579	9/29008	0.000607502	0.00955032	0.00669521	Camk2d/Dock2/Pik3cg	3
Up-regualted	GO:0060290	transdifferentiation	3/579	9/29008	0.000607502	0.00955032	0.00669521	Mef2c/Smad3/Tert	3
Up-regualted	GO:0071659	negative regulation of IP-10 production	3/579	10/29008	0.000855011	0.012237	0.00857873	Lilrb4b/Oas1c/Oas3	3
Up-regualted	GO:0002645	positive regulation of tolerance induction	3/579	11/29008	0.00115825	0.0147029	0.0103074	Cblb/Cd274/Lilrb4b	3
Up-regualted	GO:0071612	IP-10 production	3/579	11/29008	0.00115825	0.0147029	0.0103074	Lilrb4b/Oas1c/Oas3	3
Up-regualted	GO:0071658	regulation of IP-10 production	3/579	11/29008	0.00115825	0.0147029	0.0103074	Lilrb4b/Oas1c/Oas3	3
Up-regualted	GO:1904753	negative regulation of vascular associated smooth muscle cell migration	3/579	11/29008	0.00115825	0.0147029	0.0103074	Gna13/Mef2c/Prkg1	3
Up-regualted	GO:0006020	inositol metabolic process	3/579	12/29008	0.00152152	0.0173607	0.0121707	Itpk1/Mecp2/Slc5a3	3
Up-regualted	GO:0014842	regulation of skeletal muscle satellite cell proliferation	3/579	12/29008	0.00152152	0.0173607	0.0121707	Angpt1/Six5/Stat3	3
Up-regualted	GO:1902947	regulation of tau-protein kinase activity	3/579	12/29008	0.00152152	0.0173607	0.0121707	Dkk1/Egr1/Nab2	3
Up-regualted	GO:2000322	regulation of glucocorticoid receptor signaling pathway	3/579	12/29008	0.00152152	0.0173607	0.0121707	Clock/Ncoa2/Per1	3
Up-regualted	GO:0097011	cellular response to granulocyte macrophage colony-stimulating factor stimulus	3/579	13/29008	0.00194878	0.0207981	0.0145805	Etv3/Pde1b/Zfp36	3
Up-regualted	GO:0014841	skeletal muscle satellite cell proliferation	3/579	14/29008	0.00244369	0.0236783	0.0165996	Angpt1/Six5/Stat3	3
Up-regualted	GO:0045906	negative regulation of vasoconstriction	3/579	14/29008	0.00244369	0.0236783	0.0165996	Bmpr2/Dock4/Dusp5	3
Up-regualted	GO:0046886	positive regulation of hormone biosynthetic process	3/579	14/29008	0.00244369	0.0236783	0.0165996	Egr1/Lhcgr/Ppargc1a	3
Up-regualted	GO:0090308	regulation of DNA methylation-dependent heterochromatin assembly	3/579	14/29008	0.00244369	0.0236783	0.0165996	Atf7ip/Tasor/Tet1	3
Up-regualted	GO:0097012	response to granulocyte macrophage colony-stimulating factor	3/579	14/29008	0.00244369	0.0236783	0.0165996	Etv3/Pde1b/Zfp36	3
Up-regualted	GO:0014857	regulation of skeletal muscle cell proliferation	3/579	15/29008	0.00300961	0.0274468	0.0192415	Angpt1/Six5/Stat3	3
Up-regualted	GO:0033690	positive regulation of osteoblast proliferation	3/579	15/29008	0.00300961	0.0274468	0.0192415	Abl1/Ccn1/Itgav	3
Up-regualted	GO:0061469	regulation of type B pancreatic cell proliferation	3/579	15/29008	0.00300961	0.0274468	0.0192415	Nr4a1/Reg2/Wdr13	3
Up-regualted	GO:0070307	lens fiber cell development	3/579	15/29008	0.00300961	0.0274468	0.0192415	Abi2/Fgfr3/Frs2	3
Up-regualted	GO:0070932	histone H3 deacetylation	3/579	15/29008	0.00300961	0.0274468	0.0192415	Hdac9/Per1/Smarcad1	3
Up-regualted	GO:0042921	glucocorticoid receptor signaling pathway	3/579	16/29008	0.00364963	0.030894	0.0216581	Clock/Ncoa2/Per1	3
Up-regualted	GO:0055119	relaxation of cardiac muscle	3/579	16/29008	0.00364963	0.030894	0.0216581	Camk2d/Kcnj2/Pde4d	3
Up-regualted	GO:0014856	skeletal muscle cell proliferation	3/579	17/29008	0.00436655	0.0337862	0.0236857	Angpt1/Six5/Stat3	3
Up-regualted	GO:0031445	regulation of heterochromatin assembly	3/579	17/29008	0.00436655	0.0337862	0.0236857	Atf7ip/Tasor/Tet1	3
Up-regualted	GO:0031958	corticosteroid receptor signaling pathway	3/579	17/29008	0.00436655	0.0337862	0.0236857	Clock/Ncoa2/Per1	3
Up-regualted	GO:0032957	inositol trisphosphate metabolic process	3/579	17/29008	0.00436655	0.0337862	0.0236857	Itpk1/Lhcgr/Plcg2	3
Up-regualted	GO:0045059	positive thymic T cell selection	3/579	17/29008	0.00436655	0.0337862	0.0236857	Dock2/Ptprc/Tox	3
Up-regualted	GO:0045655	regulation of monocyte differentiation	3/579	17/29008	0.00436655	0.0337862	0.0236857	Foxp1/Inpp5d/Jun	3
Up-regualted	GO:0051589	negative regulation of neurotransmitter transport	3/579	17/29008	0.00436655	0.0337862	0.0236857	Braf/Ppp1r9a/Slc18a2	3
Up-regualted	GO:0060100	positive regulation of phagocytosis, engulfment	3/579	17/29008	0.00436655	0.0337862	0.0236857	Gata2/Plcg2/Stap1	3
Up-regualted	GO:0060788	ectodermal placode formation	3/579	17/29008	0.00436655	0.0337862	0.0236857	Eda/Frs2/Pou2f1	3
Up-regualted	GO:0061430	bone trabecula morphogenesis	3/579	17/29008	0.00436655	0.0337862	0.0236857	Fgfr3/Sbno2/Vdr	3
Up-regualted	GO:0071498	cellular response to fluid shear stress	3/579	17/29008	0.00436655	0.0337862	0.0236857	Mef2c/Pkd2/Plec	3
Up-regualted	GO:0071697	ectodermal placode morphogenesis	3/579	17/29008	0.00436655	0.0337862	0.0236857	Eda/Frs2/Pou2f1	3
Up-regualted	GO:0090336	positive regulation of brown fat cell differentiation	3/579	17/29008	0.00436655	0.0337862	0.0236857	Mecom/Prdm16/Rreb1	3
Up-regualted	GO:0120261	regulation of heterochromatin organization	3/579	17/29008	0.00436655	0.0337862	0.0236857	Atf7ip/Tasor/Tet1	3
Up-regualted	GO:1901160	primary amino compound metabolic process	3/579	17/29008	0.00436655	0.0337862	0.0236857	Chka/Pde1b/Rnf180	3
Up-regualted	GO:1905155	positive regulation of membrane invagination	3/579	17/29008	0.00436655	0.0337862	0.0236857	Gata2/Plcg2/Stap1	3
Up-regualted	GO:0036035	osteoclast development	3/579	18/29008	0.00516291	0.0374879	0.0262807	Foxp1/Lrrk1/Slc9b2	3
Up-regualted	GO:0060416	response to growth hormone	3/579	18/29008	0.00516291	0.0374879	0.0262807	Irf1/Mbd5/Stat3	3
Up-regualted	GO:0071696	ectodermal placode development	3/579	18/29008	0.00516291	0.0374879	0.0262807	Eda/Frs2/Pou2f1	3
Up-regualted	GO:2001185	regulation of CD8-positive, alpha-beta T cell activation	3/579	18/29008	0.00516291	0.0374879	0.0262807	Cd274/Irf1/Lilrb4b	3
Up-regualted	GO:0032823	regulation of natural killer cell differentiation	3/579	19/29008	0.00604102	0.0409797	0.0287286	Irf1/Pglyrp2/Tox	3
Up-regualted	GO:0033623	regulation of integrin activation	3/579	19/29008	0.00604102	0.0409797	0.0287286	Cdh17/Farp2/Selp	3
Up-regualted	GO:0035641	locomotory exploration behavior	3/579	19/29008	0.00604102	0.0409797	0.0287286	Dlg4/Nlgn2/Shank3	3
Up-regualted	GO:0043046	DNA methylation involved in gamete generation	3/579	19/29008	0.00604102	0.0409797	0.0287286	Ddx4/Dnmt3a/Tdrd1	3
Up-regualted	GO:0090660	cerebrospinal fluid circulation	3/579	19/29008	0.00604102	0.0409797	0.0287286	Cfap54/Katnip/Spag6l	3
Up-regualted	GO:1904754	positive regulation of vascular associated smooth muscle cell migration	3/579	19/29008	0.00604102	0.0409797	0.0287286	Dock4/Iqgap1/Tert	3
Up-regualted	GO:2000725	regulation of cardiac muscle cell differentiation	3/579	19/29008	0.00604102	0.0409797	0.0287286	Dkk1/Frs2/Mef2c	3
Up-regualted	GO:0002643	regulation of tolerance induction	3/579	20/29008	0.00700294	0.0450371	0.0315731	Cblb/Cd274/Lilrb4b	3
Up-regualted	GO:0030220	platelet formation	3/579	20/29008	0.00700294	0.0450371	0.0315731	Mef2c/Mfap2/Nbeal2	3
Up-regualted	GO:0032252	secretory granule localization	3/579	20/29008	0.00700294	0.0450371	0.0315731	Mapk8/Mecp2/Pik3cg	3
Up-regualted	GO:0033599	regulation of mammary gland epithelial cell proliferation	3/579	20/29008	0.00700294	0.0450371	0.0315731	Gata3/Kdm5b/Rreb1	3
Up-regualted	GO:0045986	negative regulation of smooth muscle contraction	3/579	20/29008	0.00700294	0.0450371	0.0315731	Dock4/Gucy1a1/Prkg1	3
Up-regualted	GO:0048712	negative regulation of astrocyte differentiation	3/579	20/29008	0.00700294	0.0450371	0.0315731	Fgfr3/Mecp2/Mycn	3
Up-regualted	GO:0060099	regulation of phagocytosis, engulfment	3/579	20/29008	0.00700294	0.0450371	0.0315731	Gata2/Plcg2/Stap1	3
Up-regualted	GO:0060149	negative regulation of posttranscriptional gene silencing	3/579	20/29008	0.00700294	0.0450371	0.0315731	Mecp2/Stat3/Tert	3
Up-regualted	GO:0060967	negative regulation of gene silencing by RNA	3/579	20/29008	0.00700294	0.0450371	0.0315731	Mecp2/Stat3/Tert	3
Up-regualted	GO:0072189	ureter development	3/579	20/29008	0.00700294	0.0450371	0.0315731	Gata3/Mecom/Nphp3	3
Up-regualted	GO:0090030	regulation of steroid hormone biosynthetic process	3/579	20/29008	0.00700294	0.0450371	0.0315731	H6pd/Lhcgr/Rest	3
Up-regualted	GO:0001946	lymphangiogenesis	3/579	21/29008	0.0080505	0.0486765	0.0341245	Acvr2b/Bmpr2/Vash1	3
Up-regualted	GO:0001976	nervous system process involved in regulation of systemic arterial blood pressure	3/579	21/29008	0.0080505	0.0486765	0.0341245	Mecp2/Nav2/P2rx2	3
Up-regualted	GO:0003177	pulmonary valve development	3/579	21/29008	0.0080505	0.0486765	0.0341245	Bmpr2/Slit2/Tnfrsf1b	3
Up-regualted	GO:0006700	C21-steroid hormone biosynthetic process	3/579	21/29008	0.0080505	0.0486765	0.0341245	Egr1/Ppargc1a/Rest	3
Up-regualted	GO:0032674	regulation of interleukin-5 production	3/579	21/29008	0.0080505	0.0486765	0.0341245	Gata3/Lilrb4b/Pde4d	3
Up-regualted	GO:0036344	platelet morphogenesis	3/579	21/29008	0.0080505	0.0486765	0.0341245	Mef2c/Mfap2/Nbeal2	3
Up-regualted	GO:0046321	positive regulation of fatty acid oxidation	3/579	21/29008	0.0080505	0.0486765	0.0341245	Abcd2/Dgat1/Ppargc1a	3
Up-regualted	GO:0048753	pigment granule organization	3/579	21/29008	0.0080505	0.0486765	0.0341245	Bcl2/Lyst/Pikfyve	3
Up-regualted	GO:1903209	positive regulation of oxidative stress-induced cell death	3/579	21/29008	0.0080505	0.0486765	0.0341245	Abl1/Foxp1/Rest	3
Up-regualted	GO:1905153	regulation of membrane invagination	3/579	21/29008	0.0080505	0.0486765	0.0341245	Gata2/Plcg2/Stap1	3
Up-regualted	GO:0006701	progesterone biosynthetic process	2/579	5/29008	0.00382139	0.0314344	0.0220369	Egr1/Ppargc1a	2
Up-regualted	GO:0010694	positive regulation of alkaline phosphatase activity	2/579	5/29008	0.00382139	0.0314344	0.0220369	Mef2c/Smad3	2
Up-regualted	GO:0030473	nuclear migration along microtubule	2/579	5/29008	0.00382139	0.0314344	0.0220369	Sun2/Syne2	2
Up-regualted	GO:0031554	regulation of DNA-templated transcription, termination	2/579	5/29008	0.00382139	0.0314344	0.0220369	Scaf8/Setx	2
Up-regualted	GO:0031581	hemidesmosome assembly	2/579	5/29008	0.00382139	0.0314344	0.0220369	Dst/Plec	2
Up-regualted	GO:0036301	macrophage colony-stimulating factor production	2/579	5/29008	0.00382139	0.0314344	0.0220369	Cd34/Foxp1	2
Up-regualted	GO:0044027	hypermethylation of CpG island	2/579	5/29008	0.00382139	0.0314344	0.0220369	Dnmt3a/Kcnq1ot1	2
Up-regualted	GO:0048014	Tie signaling pathway	2/579	5/29008	0.00382139	0.0314344	0.0220369	Angpt1/Svep1	2
Up-regualted	GO:0051599	response to hydrostatic pressure	2/579	5/29008	0.00382139	0.0314344	0.0220369	Pkd2/Plec	2
Up-regualted	GO:0051665	membrane raft localization	2/579	5/29008	0.00382139	0.0314344	0.0220369	Dock2/Ptprc	2
Up-regualted	GO:0071462	cellular response to water stimulus	2/579	5/29008	0.00382139	0.0314344	0.0220369	Pkd2/Plec	2
Up-regualted	GO:1901256	regulation of macrophage colony-stimulating factor production	2/579	5/29008	0.00382139	0.0314344	0.0220369	Cd34/Foxp1	2
Up-regualted	GO:1903210	glomerular visceral epithelial cell apoptotic process	2/579	5/29008	0.00382139	0.0314344	0.0220369	Abl1/Ppargc1a	2
Up-regualted	GO:1904809	regulation of dense core granule transport	2/579	5/29008	0.00382139	0.0314344	0.0220369	Mapk8/Mecp2	2
Up-regualted	GO:1904956	regulation of midbrain dopaminergic neuron differentiation	2/579	5/29008	0.00382139	0.0314344	0.0220369	Dkk1/Lmx1a	2
Up-regualted	GO:0002051	osteoblast fate commitment	2/579	6/29008	0.00565644	0.0393409	0.0275797	Runx2/Smad5	2
Up-regualted	GO:0002669	positive regulation of T cell anergy	2/579	6/29008	0.00565644	0.0393409	0.0275797	Cblb/Lilrb4b	2
Up-regualted	GO:0002913	positive regulation of lymphocyte anergy	2/579	6/29008	0.00565644	0.0393409	0.0275797	Cblb/Lilrb4b	2
Up-regualted	GO:0032483	regulation of Rab protein signal transduction	2/579	6/29008	0.00565644	0.0393409	0.0275797	Dennd1a/Dennd4c	2
Up-regualted	GO:0035635	entry of bacterium into host cell	2/579	6/29008	0.00565644	0.0393409	0.0275797	Itgav/Naip5	2
Up-regualted	GO:0036514	dopaminergic neuron axon guidance	2/579	6/29008	0.00565644	0.0393409	0.0275797	Fzd3/Vangl2	2
Up-regualted	GO:0061038	uterus morphogenesis	2/579	6/29008	0.00565644	0.0393409	0.0275797	Ash1l/Kdm5b	2
Up-regualted	GO:0061470	T follicular helper cell differentiation	2/579	6/29008	0.00565644	0.0393409	0.0275797	Foxp1/Rc3h2	2
Up-regualted	GO:0071503	response to heparin	2/579	6/29008	0.00565644	0.0393409	0.0275797	Egr1/Slit2	2
Up-regualted	GO:0071910	determination of liver left/right asymmetry	2/579	6/29008	0.00565644	0.0393409	0.0275797	Nphp3/Pkd2	2
Up-regualted	GO:1904938	planar cell polarity pathway involved in axon guidance	2/579	6/29008	0.00565644	0.0393409	0.0275797	Fzd3/Vangl2	2
Up-regualted	GO:2000074	regulation of type B pancreatic cell development	2/579	6/29008	0.00565644	0.0393409	0.0275797	Clock/Rfx3	2
Up-regualted	GO:2000323	negative regulation of glucocorticoid receptor signaling pathway	2/579	6/29008	0.00565644	0.0393409	0.0275797	Clock/Per1	2
Up-regualted	GO:2000672	negative regulation of motor neuron apoptotic process	2/579	6/29008	0.00565644	0.0393409	0.0275797	Clcf1/Map3k12	2
Up-regualted	GO:2000821	regulation of grooming behavior	2/579	6/29008	0.00565644	0.0393409	0.0275797	Dlg4/Shank3	2
Up-regualted	GO:0001866	NK T cell proliferation	2/579	7/29008	0.00781469	0.0483126	0.0338693	Elf4/Rasal3	2
Up-regualted	GO:0006369	termination of RNA polymerase II transcription	2/579	7/29008	0.00781469	0.0483126	0.0338693	Scaf8/Setx	2
Up-regualted	GO:0021814	cell motility involved in cerebral cortex radial glia guided migration	2/579	7/29008	0.00781469	0.0483126	0.0338693	Sun2/Syne2	2
Up-regualted	GO:0032776	DNA methylation on cytosine	2/579	7/29008	0.00781469	0.0483126	0.0338693	Dnmt3a/Dnmt3b	2
Up-regualted	GO:0035898	parathyroid hormone secretion	2/579	7/29008	0.00781469	0.0483126	0.0338693	Gata3/Vdr	2
Up-regualted	GO:0044026	DNA hypermethylation	2/579	7/29008	0.00781469	0.0483126	0.0338693	Dnmt3a/Kcnq1ot1	2
Up-regualted	GO:0060763	mammary duct terminal end bud growth	2/579	7/29008	0.00781469	0.0483126	0.0338693	Kdm5b/Slit2	2
Up-regualted	GO:1901033	positive regulation of response to reactive oxygen species	2/579	7/29008	0.00781469	0.0483126	0.0338693	Abl1/Foxp1	2
Up-regualted	GO:1903251	multi-ciliated epithelial cell differentiation	2/579	7/29008	0.00781469	0.0483126	0.0338693	Ccdc78/Ttc8	2
Up-regualted	GO:1905206	positive regulation of hydrogen peroxide-induced cell death	2/579	7/29008	0.00781469	0.0483126	0.0338693	Abl1/Foxp1	2
Up-regualted	GO:2000064	regulation of cortisol biosynthetic process	2/579	7/29008	0.00781469	0.0483126	0.0338693	H6pd/Rest	2
Down-regulated	GO:0022613	ribonucleoprotein complex biogenesis	54/533	412/29008	6.10151e-30	2.05743e-26	1.81119e-26	Brix1/Ddx18/Ddx51/Dkc1/Eif2s2/Eif3d/Emg1/Exosc1/Exosc2/Exosc3/Exosc4/Exosc7/Exosc8/Exosc9/Fcf1/Gar1/Gemin6/Gtf2h5/Gtpbp4/Hsp90aa1/Lsm4/Lyar/Mphosph10/Mphosph6/Mpv17l2/Mrpl20/Mrpl22/Mrpl36/Mrps7/Mrto4/Ngdn/Nhp2/Nip7/Nop16/Nop56/Pih1d2/Pop5/Ran/Riox1/Rpf1/Rpf2/Rpl27/Rpp30/Rps27l/Rrp15/Ruvbl2/Snrpd2/Tsr3/Usp39/Utp18/Wdr55/Wdr74/Zfp622/Znhit3	54
Down-regulated	GO:0034660	ncRNA metabolic process	50/533	453/29008	2.50589e-24	2.11247e-21	1.85963e-21	Brix1/Ddx18/Ddx51/Dkc1/Dtwd1/Emg1/Exosc1/Exosc2/Exosc3/Exosc4/Exosc7/Exosc8/Exosc9/Fcf1/Gar1/Grsf1/Gtf2h5/Gtpbp4/Ints8/Lyar/Mettl1/Mettl3/Mphosph10/Mphosph6/Mrto4/Nars/Ngdn/Nhp2/Osgepl1/Pelo/Pih1d2/Polr3k/Pop5/Qtrt1/Rnf113a1/Rpf1/Rpf2/Rpl27/Rpp30/Rrp15/Tarsl2/Thg1l/Trmo/Trmt10c/Trmt12/Tsr3/Utp18/Wdr55/Wdr74/Znhit3	50
Down-regulated	GO:0034470	ncRNA processing	47/533	362/29008	5.50634e-26	6.18912e-23	5.44837e-23	Brix1/Ddx18/Ddx51/Dkc1/Dtwd1/Emg1/Exosc1/Exosc2/Exosc3/Exosc4/Exosc7/Exosc8/Exosc9/Fcf1/Gar1/Grsf1/Gtf2h5/Gtpbp4/Ints8/Lyar/Mettl1/Mettl3/Mphosph10/Mphosph6/Mrto4/Ngdn/Nhp2/Osgepl1/Pih1d2/Polr3k/Pop5/Qtrt1/Rnf113a1/Rpf1/Rpf2/Rpl27/Rpp30/Rrp15/Thg1l/Trmo/Trmt10c/Trmt12/Tsr3/Utp18/Wdr55/Wdr74/Znhit3	47
Down-regulated	GO:0042254	ribosome biogenesis	46/533	296/29008	6.74633e-29	1.13743e-25	1.0013e-25	Brix1/Ddx18/Ddx51/Dkc1/Emg1/Exosc1/Exosc2/Exosc3/Exosc4/Exosc7/Exosc8/Exosc9/Fcf1/Gar1/Gtf2h5/Gtpbp4/Lyar/Mphosph10/Mphosph6/Mpv17l2/Mrpl20/Mrpl22/Mrpl36/Mrps7/Mrto4/Ngdn/Nhp2/Nip7/Nop16/Nop56/Pih1d2/Pop5/Ran/Riox1/Rpf1/Rpf2/Rpl27/Rpp30/Rps27l/Rrp15/Tsr3/Utp18/Wdr55/Wdr74/Zfp622/Znhit3	46
Down-regulated	GO:0072594	establishment of protein localization to organelle	37/533	418/29008	3.71126e-15	6.25718e-13	5.50829e-13	Atpif1/Calm3/Cct5/Cct7/Cct8/Chchd4/Dkc1/Dnajc15/Dnajc19/Hikeshi/Hsp90aa1/Hspa8/Hspd1/Hsph1/Mipep/Mtch2/Nup107/Nup35/Nup54/Pola2/Ran/Rangrf/Romo1/Ruvbl2/Snf8/Spcs1/Spcs2/Tcp1/Timm10/Timm13/Timm17a/Timm21/Timm22/Timm8a1/Tomm20/Tomm5/Tomm70a	37
Down-regulated	GO:0006091	generation of precursor metabolites and energy	36/533	428/29008	4.19805e-14	5.44454e-12	4.79291e-12	Adsl/Atp5k/Atp5o/Ccnb1/Chchd4/Cisd1/Cox17/Cox4i1/Cox5a/Cox5b/Cox7a2/Cox7c/Cycs/Dld/Dnajc15/Gadd45gip1/Idh3b/Iscu/Khk/Mdh2/Mtch2/Mtln/Ndufa12/Ndufb6/Ndufb8/Ndufb9/Ndufs6/Ndufs7/Rpe/Rpia/Sdhb/Slc25a33/Sucla2/Uqcc2/Uqcr10/Uqcrq	36
Down-regulated	GO:0016072	rRNA metabolic process	35/533	224/29008	2.5199e-22	1.69942e-19	1.49603e-19	Brix1/Ddx18/Ddx51/Dkc1/Emg1/Exosc1/Exosc2/Exosc3/Exosc4/Exosc7/Exosc8/Exosc9/Fcf1/Gar1/Gtf2h5/Gtpbp4/Lyar/Mphosph10/Mphosph6/Mrto4/Ngdn/Nhp2/Pelo/Pih1d2/Pop5/Rpf1/Rpf2/Rpl27/Rpp30/Rrp15/Tsr3/Utp18/Wdr55/Wdr74/Znhit3	35
Down-regulated	GO:0006364	rRNA processing	34/533	214/29008	5.81063e-22	3.26557e-19	2.87473e-19	Brix1/Ddx18/Ddx51/Dkc1/Emg1/Exosc1/Exosc2/Exosc3/Exosc4/Exosc7/Exosc8/Exosc9/Fcf1/Gar1/Gtf2h5/Gtpbp4/Lyar/Mphosph10/Mphosph6/Mrto4/Ngdn/Nhp2/Pih1d2/Pop5/Rpf1/Rpf2/Rpl27/Rpp30/Rrp15/Tsr3/Utp18/Wdr55/Wdr74/Znhit3	34
Down-regulated	GO:0006397	mRNA processing	34/533	469/29008	1.38802e-11	1.67157e-09	1.47151e-09	Arl6ip4/Aurkaip1/Bcas2/Ccnb1/Ddx39a/Fxr1/Gemin6/Grsf1/Hnrnpc/Hnrnpll/Hspa8/Lsm1/Lsm10/Lsm4/Lsm7/Mettl3/Ncbp2/Phf5a/Prmt9/Prpf38a/Ptcd2/Rbm8a/Slbp/Snrnp25/Snrnp27/Snrpa1/Snrpd2/Srsf2/Srsf7/Supt4a/Txnl4a/Usp39/Ybx1/Zcrb1	34
Down-regulated	GO:0015980	energy derivation by oxidation of organic compounds	33/533	305/29008	3.55434e-16	7.05013e-14	6.20633e-14	Adsl/Atp5k/Atp5o/Ccnb1/Chchd4/Cisd1/Cox4i1/Cox5a/Cox5b/Cox7a2/Cox7c/Cycs/Dld/Dnajc15/Gadd45gip1/Idh3b/Iscu/Khk/Mdh2/Mtch2/Mtln/Ndufa12/Ndufb6/Ndufb8/Ndufb9/Ndufs6/Ndufs7/Sdhb/Slc25a33/Sucla2/Uqcc2/Uqcr10/Uqcrq	33
Down-regulated	GO:0045333	cellular respiration	32/533	215/29008	7.36187e-20	2.75825e-17	2.42813e-17	Adsl/Atp5k/Atp5o/Ccnb1/Chchd4/Cisd1/Cox4i1/Cox5a/Cox5b/Cox7a2/Cox7c/Cycs/Dld/Dnajc15/Gadd45gip1/Idh3b/Iscu/Mdh2/Mtch2/Mtln/Ndufa12/Ndufb6/Ndufb8/Ndufb9/Ndufs6/Ndufs7/Sdhb/Slc25a33/Sucla2/Uqcc2/Uqcr10/Uqcrq	32
Down-regulated	GO:0009060	aerobic respiration	29/533	161/29008	1.75244e-20	7.38654e-18	6.50248e-18	Adsl/Atp5k/Atp5o/Ccnb1/Cox4i1/Cox5a/Cox5b/Cox7a2/Cox7c/Cycs/Dld/Dnajc15/Gadd45gip1/Idh3b/Iscu/Mdh2/Mtch2/Ndufa12/Ndufb6/Ndufb8/Ndufb9/Ndufs6/Ndufs7/Sdhb/Slc25a33/Sucla2/Uqcc2/Uqcr10/Uqcrq	29
Down-regulated	GO:0046034	ATP metabolic process	29/533	259/29008	9.27129e-15	1.44596e-12	1.2729e-12	Atp5g1/Atp5k/Atp5l/Atp5o/Atpif1/Ccnb1/Cox4i1/Cox5a/Cox5b/Cox7a2/Cox7c/Cycs/Dld/Dnajc15/Gadd45gip1/Hspa8/Iscu/Khk/Mtch2/Ndufa12/Ndufb6/Ndufb8/Ndufb9/Ndufs6/Ndufs7/Slc25a33/Uqcc2/Uqcr10/Uqcrq	29
Down-regulated	GO:0008380	RNA splicing	29/533	398/29008	4.02277e-10	3.98964e-08	3.51214e-08	Arl6ip4/Bcas2/Ddx39a/Fxr1/Gemin6/Grsf1/Hnrnpc/Hnrnpll/Hspa8/Lsm1/Lsm10/Lsm4/Lsm7/Mettl3/Ncbp2/Phf5a/Prpf38a/Rbm8a/Rnf113a1/Snrnp25/Snrnp27/Snrpa1/Snrpd2/Srsf2/Srsf7/Txnl4a/Usp39/Ybx1/Zcrb1	29
Down-regulated	GO:0034248	regulation of cellular amide metabolic process	27/533	448/29008	8.69599e-08	4.44286e-06	3.91112e-06	Coa3/Eif2b5/Eif2s1/Eif3b/Eif3d/Eif3k/Exosc2/Exosc3/Exosc7/Exosc8/Exosc9/Fxr1/Gspt1/Lsm1/Mettl3/Mpv17l2/Mrps27/Ncbp2/Ngdn/Ormdl2/Pelo/Polr2g/Rps23rg1/Rps27l/Sarnp/Trmt10c/Uqcc2	27
Down-regulated	GO:0006839	mitochondrial transport	25/533	212/29008	2.03415e-13	2.54043e-11	2.23638e-11	Atp5k/Atp5o/Atpif1/Chchd4/Dnajc15/Dnajc19/Hsp90aa1/Hspd1/Kifbp/Mipep/Mpc1/Mrpl18/Mtch2/Romo1/Slc25a33/Slc25a38/Timm10/Timm13/Timm17a/Timm21/Timm22/Timm8a1/Tomm20/Tomm5/Tomm70a	25
Down-regulated	GO:0006417	regulation of translation	25/533	390/29008	8.1334e-08	4.21936e-06	3.71436e-06	Coa3/Eif2b5/Eif2s1/Eif3b/Eif3d/Eif3k/Exosc2/Exosc3/Exosc7/Exosc8/Exosc9/Fxr1/Gspt1/Lsm1/Mettl3/Mpv17l2/Mrps27/Ncbp2/Ngdn/Pelo/Polr2g/Rps27l/Sarnp/Trmt10c/Uqcc2	25
Down-regulated	GO:0044270	cellular nitrogen compound catabolic process	25/533	414/29008	2.52174e-07	1.11886e-05	9.84947e-06	Blvra/Blvrb/Dkc1/Exosc2/Exosc3/Exosc4/Exosc7/Exosc8/Exosc9/Fxr1/Grsf1/Gspt1/Hprt/Lsm1/Lsm4/Lsm7/Mettl3/Mrto4/Ncbp2/Pelo/Polr2g/Rbm8a/Slirp/Ybx1/Zcchc17	25
Down-regulated	GO:0046700	heterocycle catabolic process	25/533	415/29008	2.63818e-07	1.15532e-05	1.01704e-05	Blvra/Blvrb/Dkc1/Exosc2/Exosc3/Exosc4/Exosc7/Exosc8/Exosc9/Fxr1/Grsf1/Gspt1/Hprt/Lsm1/Lsm4/Lsm7/Mettl3/Mrto4/Ncbp2/Pelo/Polr2g/Rbm8a/Slirp/Ybx1/Zcchc17	25
Down-regulated	GO:0019439	aromatic compound catabolic process	25/533	437/29008	6.85845e-07	2.62803e-05	2.31349e-05	Blvra/Blvrb/Dkc1/Exosc2/Exosc3/Exosc4/Exosc7/Exosc8/Exosc9/Fxr1/Grsf1/Gspt1/Hprt/Lsm1/Lsm4/Lsm7/Mettl3/Mrto4/Ncbp2/Pelo/Polr2g/Rbm8a/Slirp/Ybx1/Zcchc17	25
Down-regulated	GO:1901361	organic cyclic compound catabolic process	25/533	463/29008	1.94662e-06	6.564e-05	5.77839e-05	Blvra/Blvrb/Dkc1/Exosc2/Exosc3/Exosc4/Exosc7/Exosc8/Exosc9/Fxr1/Grsf1/Gspt1/Hprt/Lsm1/Lsm4/Lsm7/Mettl3/Mrto4/Ncbp2/Pelo/Polr2g/Rbm8a/Slirp/Ybx1/Zcchc17	25
Down-regulated	GO:0033108	mitochondrial respiratory chain complex assembly	24/533	92/29008	3.3288e-21	1.60353e-18	1.41161e-18	Chchd4/Coa3/Cox17/Ndufa11/Ndufa12/Ndufa2/Ndufa9/Ndufab1/Ndufaf4/Ndufaf6/Ndufb10/Ndufb2/Ndufb4/Ndufb6/Ndufb7/Ndufb8/Ndufb9/Ndufc1/Ndufs6/Ndufs7/Slc25a33/Surf1/Timm21/Uqcc2	24
Down-regulated	GO:0006119	oxidative phosphorylation	24/533	113/29008	6.27632e-19	2.11638e-16	1.86308e-16	Atp5k/Atp5o/Ccnb1/Cox4i1/Cox5a/Cox5b/Cox7a2/Cox7c/Cycs/Dld/Dnajc15/Gadd45gip1/Iscu/Mtch2/Ndufa12/Ndufb6/Ndufb8/Ndufb9/Ndufs6/Ndufs7/Slc25a33/Uqcc2/Uqcr10/Uqcrq	24
Down-regulated	GO:0034655	nucleobase-containing compound catabolic process	23/533	386/29008	9.56126e-07	3.44119e-05	3.02933e-05	Dkc1/Exosc2/Exosc3/Exosc4/Exosc7/Exosc8/Exosc9/Fxr1/Grsf1/Gspt1/Hprt/Lsm1/Lsm4/Lsm7/Mettl3/Mrto4/Ncbp2/Pelo/Polr2g/Rbm8a/Slirp/Ybx1/Zcchc17	23
Down-regulated	GO:0070585	protein localization to mitochondrion	22/533	103/29008	1.61737e-17	4.19522e-15	3.69311e-15	Atpif1/Bag1/Calm3/Chchd4/Dnajc15/Dnajc19/Hsp90aa1/Hspd1/Hsph1/Marchf5/Mipep/Mtch2/Romo1/Timm10/Timm13/Timm17a/Timm21/Timm22/Timm8a1/Tomm20/Tomm5/Tomm70a	22
Down-regulated	GO:0006401	RNA catabolic process	22/533	272/29008	8.13747e-09	6.23626e-07	5.48987e-07	Dkc1/Exosc2/Exosc3/Exosc4/Exosc7/Exosc8/Exosc9/Fxr1/Grsf1/Gspt1/Lsm1/Lsm4/Lsm7/Mettl3/Mrto4/Ncbp2/Pelo/Polr2g/Rbm8a/Slirp/Ybx1/Zcchc17	22
Down-regulated	GO:0009896	positive regulation of catabolic process	22/533	494/29008	0.000141792	0.00300705	0.00264715	Acsl5/Atpif1/Cop1/Exosc2/Exosc3/Exosc7/Exosc8/Exosc9/Faf1/Grsf1/Hsp90aa1/Hspa1b/Lsm1/Mettl3/Mtln/Oaz1/Optn/Polr2g/Psmd10/Snf8/Snx1/Ube2v2	22
Down-regulated	GO:0006605	protein targeting	21/533	275/29008	4.80546e-08	2.84281e-06	2.50257e-06	Atpif1/Chchd4/Dnajc15/Dnajc19/Hsp90aa1/Hspa8/Hspd1/Mipep/Nup54/Romo1/Spcs1/Spcs2/Timm10/Timm13/Timm17a/Timm21/Timm22/Timm8a1/Tomm20/Tomm5/Tomm70a	21
Down-regulated	GO:0072655	establishment of protein localization to mitochondrion	20/533	97/29008	9.93442e-16	1.86105e-13	1.63831e-13	Atpif1/Calm3/Chchd4/Dnajc15/Dnajc19/Hsp90aa1/Hspd1/Hsph1/Mipep/Mtch2/Romo1/Timm10/Timm13/Timm17a/Timm21/Timm22/Timm8a1/Tomm20/Tomm5/Tomm70a	20
Down-regulated	GO:0140053	mitochondrial gene expression	20/533	109/29008	1.06961e-14	1.56815e-12	1.38046e-12	Chchd1/Coa3/Mpv17l2/Mrpl16/Mrpl2/Mrpl23/Mrpl47/Mrpl51/Mrpl57/Mrps14/Mrps16/Mrps17/Mrps18b/Mrps21/Mrps27/Mrps28/Mrps34/Slc25a33/Trmt10c/Uqcc2	20
Down-regulated	GO:0000375	RNA splicing, via transesterification reactions	20/533	279/29008	2.78218e-07	1.17269e-05	1.03234e-05	Bcas2/Ddx39a/Fxr1/Gemin6/Hspa8/Lsm4/Lsm7/Mettl3/Ncbp2/Phf5a/Prpf38a/Rbm8a/Snrnp25/Snrpa1/Snrpd2/Srsf2/Srsf7/Txnl4a/Usp39/Zcrb1	20
Down-regulated	GO:0000377	RNA splicing, via transesterification reactions with bulged adenosine as nucleophile	20/533	279/29008	2.78218e-07	1.17269e-05	1.03234e-05	Bcas2/Ddx39a/Fxr1/Gemin6/Hspa8/Lsm4/Lsm7/Mettl3/Ncbp2/Phf5a/Prpf38a/Rbm8a/Snrnp25/Snrpa1/Snrpd2/Srsf2/Srsf7/Txnl4a/Usp39/Zcrb1	20
Down-regulated	GO:0000398	mRNA splicing, via spliceosome	20/533	279/29008	2.78218e-07	1.17269e-05	1.03234e-05	Bcas2/Ddx39a/Fxr1/Gemin6/Hspa8/Lsm4/Lsm7/Mettl3/Ncbp2/Phf5a/Prpf38a/Rbm8a/Snrnp25/Snrpa1/Snrpd2/Srsf2/Srsf7/Txnl4a/Usp39/Zcrb1	20
Down-regulated	GO:0006281	DNA repair	20/533	495/29008	0.000947201	0.0152821	0.0134531	Asf1a/Atrip/Bccip/Brcc3/Cdc45/Cenpx/Chchd4/Cinp/Gtf2h5/Hpf1/Psmd14/Pttg1/Rfc4/Rmi2/Ruvbl2/Spire1/Ube2v2/Uchl5/Usp1/Wrnip1	20
Down-regulated	GO:0032543	mitochondrial translation	19/533	76/29008	1.10601e-16	2.48631e-14	2.18874e-14	Chchd1/Coa3/Mpv17l2/Mrpl16/Mrpl2/Mrpl23/Mrpl47/Mrpl51/Mrpl57/Mrps14/Mrps16/Mrps17/Mrps18b/Mrps21/Mrps27/Mrps28/Mrps34/Trmt10c/Uqcc2	19
Down-regulated	GO:0022904	respiratory electron transport chain	19/533	87/29008	1.67629e-15	2.97497e-13	2.61891e-13	Ccnb1/Cox4i1/Cox5a/Cox5b/Cox7c/Cycs/Dld/Dnajc15/Iscu/Mtch2/Ndufa12/Ndufb6/Ndufb8/Ndufb9/Ndufs6/Ndufs7/Sdhb/Uqcr10/Uqcrq	19
Down-regulated	GO:0022900	electron transport chain	19/533	95/29008	9.43392e-15	1.44596e-12	1.2729e-12	Ccnb1/Cox4i1/Cox5a/Cox5b/Cox7c/Cycs/Dld/Dnajc15/Iscu/Mtch2/Ndufa12/Ndufb6/Ndufb8/Ndufb9/Ndufs6/Ndufs7/Sdhb/Uqcr10/Uqcrq	19
Down-regulated	GO:0006399	tRNA metabolic process	19/533	168/29008	3.31108e-10	3.38332e-08	2.97839e-08	Dtwd1/Exosc2/Exosc3/Exosc7/Exosc8/Exosc9/Grsf1/Mettl1/Nars/Osgepl1/Polr3k/Pop5/Qtrt1/Rpp30/Tarsl2/Thg1l/Trmo/Trmt10c/Trmt12	19
Down-regulated	GO:0031331	positive regulation of cellular catabolic process	19/533	425/29008	0.00037724	0.00702792	0.00618678	Acsl5/Atpif1/Cop1/Exosc2/Exosc3/Exosc7/Exosc8/Exosc9/Faf1/Grsf1/Hsp90aa1/Hspa1b/Lsm1/Mettl3/Mtln/Optn/Polr2g/Psmd10/Ube2v2	19
Down-regulated	GO:0090407	organophosphate biosynthetic process	19/533	476/29008	0.00144496	0.0214412	0.018875	Acsl5/Adsl/Atp5g1/Atp5k/Atp5l/Atp5o/Cmpk2/Dld/Hprt/Mpc1/Nme1/Nme6/Pigyl/Ppip5k1/Ptdss2/Ptpmt1/Tamm41/Umps/Vac14	19
Down-regulated	GO:0048285	organelle fission	19/533	495/29008	0.0022439	0.0299069	0.0263275	Bccip/Ccnb1/Ccnb2/Ccne1/Cenpx/Hspa1b/Marchf5/Mtch2/Mtfp1/Nme6/Psmc3ip/Psmg2/Pttg1/Ran/Ranbp1/Rgcc/Spdl1/Spire1/Syce2	19
Down-regulated	GO:0010257	NADH dehydrogenase complex assembly	18/533	57/29008	6.86171e-18	1.92814e-15	1.69737e-15	Ndufa11/Ndufa12/Ndufa2/Ndufa9/Ndufab1/Ndufaf4/Ndufaf6/Ndufb10/Ndufb2/Ndufb4/Ndufb6/Ndufb7/Ndufb8/Ndufb9/Ndufc1/Ndufs6/Ndufs7/Timm21	18
Down-regulated	GO:0032981	mitochondrial respiratory chain complex I assembly	18/533	57/29008	6.86171e-18	1.92814e-15	1.69737e-15	Ndufa11/Ndufa12/Ndufa2/Ndufa9/Ndufab1/Ndufaf4/Ndufaf6/Ndufb10/Ndufb2/Ndufb4/Ndufb6/Ndufb7/Ndufb8/Ndufb9/Ndufc1/Ndufs6/Ndufs7/Timm21	18
Down-regulated	GO:0042775	mitochondrial ATP synthesis coupled electron transport	18/533	65/29008	9.6163e-17	2.31615e-14	2.03894e-14	Ccnb1/Cox4i1/Cox5a/Cox5b/Cox7c/Cycs/Dld/Dnajc15/Iscu/Mtch2/Ndufa12/Ndufb6/Ndufb8/Ndufb9/Ndufs6/Ndufs7/Uqcr10/Uqcrq	18
Down-regulated	GO:0042773	ATP synthesis coupled electron transport	18/533	67/29008	1.74767e-16	3.68321e-14	3.24238e-14	Ccnb1/Cox4i1/Cox5a/Cox5b/Cox7c/Cycs/Dld/Dnajc15/Iscu/Mtch2/Ndufa12/Ndufb6/Ndufb8/Ndufb9/Ndufs6/Ndufs7/Uqcr10/Uqcrq	18
Down-regulated	GO:0017038	protein import	18/533	229/29008	2.83787e-07	1.18139e-05	1.04e-05	Chchd4/Dnajc15/Dnajc19/Hikeshi/Hsp90aa1/Hspa8/Hspd1/Nup107/Nup35/Nup54/Pola2/Ran/Rangrf/Romo1/Timm17a/Timm21/Tomm20/Tomm70a	18
Down-regulated	GO:0006402	mRNA catabolic process	18/533	231/29008	3.22814e-07	1.32747e-05	1.16859e-05	Exosc2/Exosc3/Exosc4/Exosc7/Exosc8/Exosc9/Fxr1/Gspt1/Lsm1/Lsm4/Lsm7/Mettl3/Mrto4/Ncbp2/Pelo/Polr2g/Rbm8a/Ybx1	18
Down-regulated	GO:1903311	regulation of mRNA metabolic process	18/533	293/29008	9.49051e-06	0.000271203	0.000238744	Ccnb1/Exosc2/Exosc3/Exosc7/Exosc8/Exosc9/Fxr1/Hnrnpc/Hspa8/Lsm1/Mettl3/Ncbp2/Polr2g/Ptcd2/Rbm8a/Srsf2/Srsf7/Ybx1	18
Down-regulated	GO:0043161	proteasome-mediated ubiquitin-dependent protein catabolic process	18/533	423/29008	0.000938622	0.0152165	0.0133953	Cop1/Dnajb14/Hspa1b/Psma5/Psmb3/Psmc2/Psmc4/Psmc5/Psmc6/Psmd10/Psmd12/Psmd14/Psmd7/Selenos/Stt3b/Ube2j2/Ube2v2/Uchl5	18
Down-regulated	GO:0006626	protein targeting to mitochondrion	17/533	75/29008	2.67449e-14	3.60735e-12	3.1756e-12	Atpif1/Chchd4/Dnajc15/Dnajc19/Hsp90aa1/Hspd1/Mipep/Romo1/Timm10/Timm13/Timm17a/Timm21/Timm22/Timm8a1/Tomm20/Tomm5/Tomm70a	17
Down-regulated	GO:0006403	RNA localization	17/533	174/29008	2.60368e-08	1.68839e-06	1.48631e-06	Ddx39a/Dkc1/Exosc2/Exosc3/Mrpl18/Ncbp2/Nup107/Nup35/Nup54/Ran/Sarnp/Slbp/Srsf7/Tcp1/Tomm20/Ybx1/Znhit3	17
Down-regulated	GO:0006790	sulfur compound metabolic process	17/533	326/29008	0.000127985	0.00274883	0.00241984	Acsl5/Amd1/Apip/Ciao2b/Ciao3/Dld/Eef1g/Glo1/Glrx5/Gstp1/Iscu/Lias/Lyrm4/Mpc1/Nubp2/Pcmt1/Sucla2	17
Down-regulated	GO:0019693	ribose phosphate metabolic process	17/533	379/29008	0.000725544	0.0123562	0.0108774	Acsl5/Adsl/Atp5g1/Atp5k/Atp5l/Atp5o/Dld/Hprt/Khk/Mpc1/Mtch2/Nme1/Nme6/Ran/Rpia/Sucla2/Umps	17
Down-regulated	GO:0042176	regulation of protein catabolic process	17/533	389/29008	0.000965207	0.0154985	0.0136435	Alad/Atpif1/Cop1/Faf1/Hsp90aa1/Hspa1b/Oaz1/Phb/Psmd10/Psmd14/Psme2/Psme3/Psmf1/Snf8/Snx1/Ube2v2/Uchl5	17
Down-regulated	GO:0006979	response to oxidative stress	17/533	407/29008	0.00156759	0.0226863	0.0199711	Chchd4/Eif2s1/Epor/Gstp1/Hsph1/Lias/Ndufa12/Ndufb4/Nqo1/Ppid/Prdx3/Romo1/Selenos/Slc11a2/Thg1l/Trpm2/Zfp622	17
Down-regulated	GO:0006457	protein folding	16/533	163/29008	6.25787e-08	3.38478e-06	2.97967e-06	Bag1/Cct5/Cct7/Cct8/Chchd4/Dnajb14/Hsp90aa1/Hspa1b/Hspa8/Hspd1/Hspe1/Hsph1/Pfdn6/Ppid/Qsox1/Tcp1	16
Down-regulated	GO:0022618	ribonucleoprotein complex assembly	16/533	171/29008	1.22132e-07	6.05631e-06	5.33146e-06	Brix1/Eif2s2/Eif3d/Gemin6/Hsp90aa1/Lsm4/Mrpl20/Mrps7/Mrto4/Pih1d2/Rpf2/Rps27l/Ruvbl2/Snrpd2/Usp39/Znhit3	16
Down-regulated	GO:0071826	ribonucleoprotein complex subunit organization	16/533	178/29008	2.12423e-07	1.02327e-05	9.008e-06	Brix1/Eif2s2/Eif3d/Gemin6/Hsp90aa1/Lsm4/Mrpl20/Mrps7/Mrto4/Pih1d2/Rpf2/Rps27l/Ruvbl2/Snrpd2/Usp39/Znhit3	16
Down-regulated	GO:0045862	positive regulation of proteolysis	16/533	351/29008	0.000868419	0.0143963	0.0126733	Anp32b/Atpif1/Aurkaip1/Cop1/Cycs/Hspa1b/Hspa8/Hspd1/Mtch2/Psmd10/Psme2/Psme3/Rps27l/Slc11a2/Timm17a/Ube2v2	16
Down-regulated	GO:0009259	ribonucleotide metabolic process	16/533	367/29008	0.00137919	0.0208392	0.0183451	Acsl5/Adsl/Atp5g1/Atp5k/Atp5l/Atp5o/Dld/Hprt/Khk/Mpc1/Mtch2/Nme1/Nme6/Ran/Sucla2/Umps	16
Down-regulated	GO:0140694	non-membrane-bounded organelle assembly	16/533	373/29008	0.00162697	0.0234451	0.0206391	Bccip/Brix1/Ccnb2/Cenpx/Eif2s1/Hspa1b/Lsm4/Mpv17l2/Mrpl20/Mrpl22/Mrps7/Mrto4/Nip7/Rpf2/Rps27l/Tnnt2	16
Down-regulated	GO:0072521	purine-containing compound metabolic process	16/533	395/29008	0.00287816	0.0369018	0.0324852	Acsl5/Adsl/Atp5g1/Atp5k/Atp5l/Atp5o/Dld/Hprt/Khk/Mpc1/Mtch2/Nme1/Nme6/Pcmt1/Ran/Sucla2	16
Down-regulated	GO:0044772	mitotic cell cycle phase transition	16/533	406/29008	0.00375436	0.0453752	0.0399445	Anp32b/Brcc3/Brd7/Calm3/Ccnb1/Ccnb2/Ccne1/Cdk2ap2/E2f4/Lsm10/Psme2/Psme3/Psmg2/Rgcc/Rps27l/Spdl1	16
Down-regulated	GO:0019646	aerobic electron transport chain	15/533	53/29008	2.48713e-14	3.49441e-12	3.07618e-12	Cox4i1/Cox5a/Cox5b/Cox7c/Cycs/Dld/Dnajc15/Iscu/Ndufb6/Ndufb8/Ndufb9/Ndufs6/Ndufs7/Uqcr10/Uqcrq	15
Down-regulated	GO:0000956	nuclear-transcribed mRNA catabolic process	15/533	111/29008	2.03609e-09	1.71642e-07	1.51099e-07	Exosc2/Exosc3/Exosc4/Exosc7/Exosc8/Exosc9/Gspt1/Lsm1/Lsm4/Lsm7/Mrto4/Ncbp2/Pelo/Polr2g/Rbm8a	15
Down-regulated	GO:0009451	RNA modification	15/533	143/29008	6.68474e-08	3.52202e-06	3.10049e-06	Dkc1/Dtwd1/Emg1/Gar1/Hnrnpc/Mettl1/Mettl3/Nhp2/Osgepl1/Qtrt1/Thg1l/Trmo/Trmt10c/Trmt12/Tsr3	15
Down-regulated	GO:0006260	DNA replication	15/533	253/29008	7.73688e-05	0.00175891	0.0015484	Cacybp/Ccne1/Cdc45/Cenpx/Cinp/Faf1/Gins1/Gtpbp4/Orc2/Orc5/Pola2/Rfc4/Rmi2/Tipin/Wrnip1	15
Down-regulated	GO:0009150	purine ribonucleotide metabolic process	15/533	348/29008	0.00214316	0.0286775	0.0252453	Acsl5/Adsl/Atp5g1/Atp5k/Atp5l/Atp5o/Dld/Hprt/Khk/Mpc1/Mtch2/Nme1/Nme6/Ran/Sucla2	15
Down-regulated	GO:0006163	purine nucleotide metabolic process	15/533	373/29008	0.00409951	0.0490197	0.0431527	Acsl5/Adsl/Atp5g1/Atp5k/Atp5l/Atp5o/Dld/Hprt/Khk/Mpc1/Mtch2/Nme1/Nme6/Ran/Sucla2	15
Down-regulated	GO:0042273	ribosomal large subunit biogenesis	14/533	72/29008	4.75455e-11	5.34411e-09	4.7045e-09	Brix1/Ddx18/Gtpbp4/Mrpl20/Mrto4/Nhp2/Nip7/Nop16/Rpf1/Rpf2/Rrp15/Wdr74/Zfp622/Znhit3	14
Down-regulated	GO:1990542	mitochondrial transmembrane transport	14/533	92/29008	1.4328e-09	1.27143e-07	1.11925e-07	Atp5k/Atp5o/Chchd4/Dnajc15/Dnajc19/Hspd1/Mpc1/Mrpl18/Romo1/Slc25a33/Slc25a38/Timm17a/Timm21/Tomm20	14
Down-regulated	GO:0031123	RNA 3'-end processing	14/533	106/29008	9.50518e-09	7.12255e-07	6.27008e-07	Ccnb1/Dkc1/Exosc2/Exosc3/Exosc4/Exosc7/Exosc8/Exosc9/Ints8/Lsm10/Ncbp2/Polr3k/Slbp/Trmt10c	14
Down-regulated	GO:0006413	translational initiation	14/533	117/29008	3.43854e-08	2.18769e-06	1.92586e-06	Eif1ad/Eif2b1/Eif2b3/Eif2b5/Eif2s1/Eif2s2/Eif3b/Eif3d/Eif3g/Eif3k/Eif3l/Mettl3/Ncbp2/Polr2g	14
Down-regulated	GO:0006913	nucleocytoplasmic transport	14/533	327/29008	0.00315295	0.039969	0.0351853	Anp32b/Chchd4/Ddx39a/Hikeshi/Hspa8/Htatip2/Nup107/Nup35/Nup54/Pola2/Prkag1/Ran/Rangrf/Sarnp	14
Down-regulated	GO:0051169	nuclear transport	14/533	327/29008	0.00315295	0.039969	0.0351853	Anp32b/Chchd4/Ddx39a/Hikeshi/Hspa8/Htatip2/Nup107/Nup35/Nup54/Pola2/Prkag1/Ran/Rangrf/Sarnp	14
Down-regulated	GO:0042440	pigment metabolic process	13/533	73/29008	7.42781e-10	6.95738e-08	6.12468e-08	Abcb6/Alad/Alas1/Atpif1/Blvra/Blvrb/Cpox/Dct/Hebp1/Hprt/Slc11a2/Urod/Uros	13
Down-regulated	GO:0043467	regulation of generation of precursor metabolites and energy	13/533	147/29008	3.4856e-06	0.000114111	0.000100454	Ccnb1/Chchd4/Cisd1/Cox17/Cox7a2/Cycs/Dnajc15/Gadd45gip1/Iscu/Khk/Mtch2/Slc25a33/Uqcc2	13
Down-regulated	GO:0015931	nucleobase-containing compound transport	13/533	195/29008	7.09917e-05	0.00163962	0.00144338	Ddx39a/Mrpl18/Ncbp2/Nup107/Nup35/Nup54/Ran/Sarnp/Slbp/Slc25a33/Srsf7/Tomm20/Ybx1	13
Down-regulated	GO:0009165	nucleotide biosynthetic process	13/533	215/29008	0.000188612	0.00383132	0.00337277	Acsl5/Adsl/Atp5g1/Atp5k/Atp5l/Atp5o/Cmpk2/Dld/Hprt/Mpc1/Nme1/Nme6/Umps	13
Down-regulated	GO:1901293	nucleoside phosphate biosynthetic process	13/533	220/29008	0.000236157	0.00457655	0.00402881	Acsl5/Adsl/Atp5g1/Atp5k/Atp5l/Atp5o/Cmpk2/Dld/Hprt/Mpc1/Nme1/Nme6/Umps	13
Down-regulated	GO:1903362	regulation of cellular protein catabolic process	13/533	246/29008	0.000683037	0.0116914	0.0102921	Alad/Atpif1/Cop1/Faf1/Hsp90aa1/Hspa1b/Psmd10/Psmd14/Psme2/Psme3/Psmf1/Ube2v2/Uchl5	13
Down-regulated	GO:0033013	tetrapyrrole metabolic process	12/533	50/29008	8.43144e-11	9.17123e-09	8.07357e-09	Abcb6/Alad/Alas1/Atpif1/Blvra/Blvrb/Clybl/Cpox/Hebp1/Slc11a2/Urod/Uros	12
Down-regulated	GO:0008033	tRNA processing	12/533	118/29008	1.91232e-06	6.51349e-05	5.73392e-05	Dtwd1/Grsf1/Mettl1/Osgepl1/Polr3k/Pop5/Qtrt1/Rpp30/Thg1l/Trmo/Trmt10c/Trmt12	12
Down-regulated	GO:0035966	response to topologically incorrect protein	12/533	138/29008	9.79793e-06	0.000277636	0.000244407	Dnajb14/Eif2s1/Hsp90aa1/Hspa1b/Hspa8/Hspd1/Hsph1/Optn/Selenos/Stt3b/Tmem33/Ube2j2	12
Down-regulated	GO:0050657	nucleic acid transport	12/533	147/29008	1.85863e-05	0.00049106	0.000432287	Ddx39a/Mrpl18/Ncbp2/Nup107/Nup35/Nup54/Ran/Sarnp/Slbp/Srsf7/Tomm20/Ybx1	12
Down-regulated	GO:0050658	RNA transport	12/533	147/29008	1.85863e-05	0.00049106	0.000432287	Ddx39a/Mrpl18/Ncbp2/Nup107/Nup35/Nup54/Ran/Sarnp/Slbp/Srsf7/Tomm20/Ybx1	12
Down-regulated	GO:0051236	establishment of RNA localization	12/533	150/29008	2.2754e-05	0.000581261	0.000511693	Ddx39a/Mrpl18/Ncbp2/Nup107/Nup35/Nup54/Ran/Sarnp/Slbp/Srsf7/Tomm20/Ybx1	12
Down-regulated	GO:0009260	ribonucleotide biosynthetic process	12/533	162/29008	4.86367e-05	0.00117988	0.00103866	Acsl5/Adsl/Atp5g1/Atp5k/Atp5l/Atp5o/Dld/Hprt/Mpc1/Nme1/Nme6/Umps	12
Down-regulated	GO:0043487	regulation of RNA stability	12/533	166/29008	6.16439e-05	0.00144349	0.00127073	Dkc1/Exosc2/Exosc3/Exosc7/Exosc8/Exosc9/Fxr1/Lsm1/Mettl3/Polr2g/Ybx1/Zcchc17	12
Down-regulated	GO:0071897	DNA biosynthetic process	12/533	170/29008	7.75508e-05	0.00175891	0.0015484	Cct5/Cct7/Cct8/Dkc1/Gar1/Hsp90aa1/Nhp2/Phb/Rfc4/Rgcc/Tcp1/Wrnip1	12
Down-regulated	GO:0046390	ribose phosphate biosynthetic process	12/533	171/29008	8.20398e-05	0.00181999	0.00160216	Acsl5/Adsl/Atp5g1/Atp5k/Atp5l/Atp5o/Dld/Hprt/Mpc1/Nme1/Nme6/Umps	12
Down-regulated	GO:0034249	negative regulation of cellular amide metabolic process	12/533	209/29008	0.000524956	0.00947289	0.00833912	Eif2s1/Exosc2/Exosc3/Exosc7/Exosc8/Exosc9/Fxr1/Lsm1/Mettl3/Ormdl2/Polr2g/Rps23rg1	12
Down-regulated	GO:0051054	positive regulation of DNA metabolic process	12/533	222/29008	0.000891978	0.014672	0.0129159	Brcc3/Cct5/Cct7/Cct8/Dkc1/Exosc3/Hsp90aa1/Rfc4/Rgcc/Spire1/Tcp1/Ube2v2	12
Down-regulated	GO:0090150	establishment of protein localization to membrane	12/533	256/29008	0.00294698	0.037641	0.0331359	Calm3/Emc4/Emc9/Hsp90aa1/Mtch2/Optn/Romo1/Timm10/Timm13/Timm22/Vamp3/Vamp5	12
Down-regulated	GO:0042168	heme metabolic process	11/533	35/29008	2.03765e-11	2.36929e-09	2.08572e-09	Abcb6/Alad/Alas1/Atpif1/Blvra/Blvrb/Cpox/Hebp1/Slc11a2/Urod/Uros	11
Down-regulated	GO:0006778	porphyrin-containing compound metabolic process	11/533	42/29008	1.86122e-10	1.96126e-08	1.72652e-08	Abcb6/Alad/Alas1/Atpif1/Blvra/Blvrb/Cpox/Hebp1/Slc11a2/Urod/Uros	11
Down-regulated	GO:0007006	mitochondrial membrane organization	11/533	108/29008	5.03586e-06	0.000152981	0.000134672	Atpif1/Calm3/Chchd3/Hsp90aa1/Micos13/Mtch2/Mtfp1/Romo1/Timm10/Timm13/Timm22	11
Down-regulated	GO:0006986	response to unfolded protein	11/533	116/29008	1.00579e-05	0.000282627	0.000248801	Eif2s1/Hsp90aa1/Hspa1b/Hspa8/Hspd1/Hsph1/Optn/Selenos/Stt3b/Tmem33/Ube2j2	11
Down-regulated	GO:1903313	positive regulation of mRNA metabolic process	11/533	129/29008	2.7486e-05	0.000691663	0.000608881	Ccnb1/Exosc2/Exosc3/Exosc7/Exosc8/Exosc9/Hspa8/Lsm1/Mettl3/Ncbp2/Polr2g	11
Down-regulated	GO:0045727	positive regulation of translation	11/533	131/29008	3.17194e-05	0.000792279	0.000697455	Coa3/Eif2b5/Eif3d/Fxr1/Mettl3/Mpv17l2/Mrps27/Polr2g/Rps27l/Trmt10c/Uqcc2	11
Down-regulated	GO:0065004	protein-DNA complex assembly	11/533	145/29008	8.03763e-05	0.00179898	0.00158367	Anp32b/Asf1a/Asf1b/Cdc45/Cenpv/Cenpx/Gtf2h5/Hat1/Psmc6/Set/Taf12	11
Down-regulated	GO:0009152	purine ribonucleotide biosynthetic process	11/533	150/29008	0.000108955	0.0023551	0.00207323	Acsl5/Adsl/Atp5g1/Atp5k/Atp5l/Atp5o/Dld/Hprt/Mpc1/Nme1/Nme6	11
Down-regulated	GO:0034250	positive regulation of cellular amide metabolic process	11/533	159/29008	0.000182402	0.00377337	0.00332175	Coa3/Eif2b5/Eif3d/Fxr1/Mettl3/Mpv17l2/Mrps27/Polr2g/Rps27l/Trmt10c/Uqcc2	11
Down-regulated	GO:0006164	purine nucleotide biosynthetic process	11/533	168/29008	0.000294122	0.00560327	0.00493264	Acsl5/Adsl/Atp5g1/Atp5k/Atp5l/Atp5o/Dld/Hprt/Mpc1/Nme1/Nme6	11
Down-regulated	GO:0072522	purine-containing compound biosynthetic process	11/533	174/29008	0.000396913	0.00731707	0.00644133	Acsl5/Adsl/Atp5g1/Atp5k/Atp5l/Atp5o/Dld/Hprt/Mpc1/Nme1/Nme6	11
Down-regulated	GO:0033044	regulation of chromosome organization	11/533	185/29008	0.000663837	0.0115385	0.0101575	Ccnb1/Cct5/Cct7/Cct8/Cenpv/Dkc1/Psmg2/Pttg1/Rmi2/Spdl1/Tcp1	11
Down-regulated	GO:0071824	protein-DNA complex subunit organization	11/533	192/29008	0.000901201	0.0147517	0.0129861	Anp32b/Asf1a/Asf1b/Cdc45/Cenpv/Cenpx/Gtf2h5/Hat1/Psmc6/Set/Taf12	11
Down-regulated	GO:1903050	regulation of proteolysis involved in cellular protein catabolic process	11/533	214/29008	0.0021425	0.0286775	0.0252453	Alad/Atpif1/Cop1/Hspa1b/Psmd10/Psmd14/Psme2/Psme3/Psmf1/Ube2v2/Uchl5	11
Down-regulated	GO:2001020	regulation of response to DNA damage stimulus	11/533	222/29008	0.00284473	0.0366123	0.0322304	Brcc3/Eef1e1/Fxr1/Kmt5a/Mtch2/Psmd10/Rmi2/Spire1/Ube2v2/Usp1/Wrnip1	11
Down-regulated	GO:0000460	maturation of 5.8S rRNA	10/533	35/29008	4.90287e-10	4.72357e-08	4.15822e-08	Exosc2/Exosc3/Exosc4/Exosc7/Exosc8/Exosc9/Fcf1/Mphosph6/Rpf1/Rrp15	10
Down-regulated	GO:0043628	ncRNA 3'-end processing	10/533	39/29008	1.58956e-09	1.37436e-07	1.20987e-07	Dkc1/Exosc2/Exosc3/Exosc4/Exosc7/Exosc8/Exosc9/Ints8/Polr3k/Trmt10c	10
Down-regulated	GO:0090501	RNA phosphodiester bond hydrolysis	10/533	72/29008	7.79184e-07	2.95215e-05	2.59882e-05	Exosc2/Exosc3/Exosc7/Exosc8/Exosc9/Fcf1/Ncbp2/Nhp2/Polr3k/Rpp30	10
Down-regulated	GO:0032200	telomere organization	10/533	130/29008	0.000150022	0.00316171	0.0027833	Ccne1/Cct5/Cct7/Cct8/Dkc1/Gar1/Hat1/Hsp90aa1/Nhp2/Tcp1	10
Down-regulated	GO:0090305	nucleic acid phosphodiester bond hydrolysis	10/533	133/29008	0.000180969	0.00376684	0.003316	Exosc2/Exosc3/Exosc7/Exosc8/Exosc9/Fcf1/Ncbp2/Nhp2/Polr3k/Rpp30	10
Down-regulated	GO:0043488	regulation of mRNA stability	10/533	152/29008	0.000528144	0.00947289	0.00833912	Exosc2/Exosc3/Exosc7/Exosc8/Exosc9/Fxr1/Lsm1/Mettl3/Polr2g/Ybx1	10
Down-regulated	GO:0061013	regulation of mRNA catabolic process	10/533	161/29008	0.00082555	0.013781	0.0121316	Exosc2/Exosc3/Exosc7/Exosc8/Exosc9/Fxr1/Lsm1/Mettl3/Polr2g/Ybx1	10
Down-regulated	GO:0051170	import into nucleus	10/533	179/29008	0.00183381	0.0259815	0.0228719	Hikeshi/Hspa8/Htatip2/Nup107/Nup35/Nup54/Pola2/Prkag1/Ran/Rangrf	10
Down-regulated	GO:0061136	regulation of proteasomal protein catabolic process	10/533	181/29008	0.00198997	0.0271668	0.0239153	Alad/Cop1/Hspa1b/Psmd10/Psmd14/Psme2/Psme3/Psmf1/Ube2v2/Uchl5	10
Down-regulated	GO:0017148	negative regulation of translation	10/533	186/29008	0.00242767	0.031977	0.0281498	Eif2s1/Exosc2/Exosc3/Exosc7/Exosc8/Exosc9/Fxr1/Lsm1/Mettl3/Polr2g	10
Down-regulated	GO:0050821	protein stabilization	10/533	190/29008	0.00283076	0.0365721	0.032195	Bag1/Cct5/Cct7/Cct8/Gtpbp4/Hsp90aa1/Hspd1/Ifi30/Phb/Tcp1	10
Down-regulated	GO:0000082	G1/S transition of mitotic cell cycle	10/533	194/29008	0.00328562	0.0402877	0.0354658	Anp32b/Brd7/Ccne1/Cdk2ap2/E2f4/Lsm10/Psme2/Psme3/Rgcc/Rps27l	10
Down-regulated	GO:0016073	snRNA metabolic process	9/533	34/29008	7.77979e-09	6.10081e-07	5.37063e-07	Dkc1/Exosc2/Exosc3/Exosc4/Exosc7/Exosc8/Exosc9/Ints8/Nhp2	9
Down-regulated	GO:0046148	pigment biosynthetic process	9/533	59/29008	1.23975e-06	4.40046e-05	3.87379e-05	Alad/Alas1/Atpif1/Cpox/Dct/Hprt/Slc11a2/Urod/Uros	9
Down-regulated	GO:0043457	regulation of cellular respiration	9/533	62/29008	1.90615e-06	6.51349e-05	5.73392e-05	Chchd4/Cisd1/Cox7a2/Cycs/Dnajc15/Gadd45gip1/Iscu/Slc25a33/Uqcc2	9
Down-regulated	GO:0042255	ribosome assembly	9/533	63/29008	2.18796e-06	7.30475e-05	6.43048e-05	Brix1/Mpv17l2/Mrpl20/Mrpl22/Mrps7/Mrto4/Nip7/Rpf2/Rps27l	9
Down-regulated	GO:1902600	proton transmembrane transport	9/533	100/29008	9.65153e-05	0.00211331	0.00186038	Atp5g1/Atp5k/Atp5l/Atp5o/Atp6v0e/Atp6v0e2/Cox17/Ndufs7/Slc11a2	9
Down-regulated	GO:0000723	telomere maintenance	9/533	125/29008	0.000518432	0.00944948	0.00831851	Ccne1/Cct5/Cct7/Cct8/Dkc1/Gar1/Hsp90aa1/Nhp2/Tcp1	9
Down-regulated	GO:0006261	DNA-dependent DNA replication	9/533	142/29008	0.00128884	0.019665	0.0173114	Ccne1/Cdc45/Cenpx/Gins1/Orc5/Pola2/Rfc4/Tipin/Wrnip1	9
Down-regulated	GO:0006120	mitochondrial electron transport, NADH to ubiquinone	8/533	29/29008	3.76839e-08	2.35315e-06	2.07151e-06	Dld/Dnajc15/Iscu/Ndufb6/Ndufb8/Ndufb9/Ndufs6/Ndufs7	8
Down-regulated	GO:0006779	porphyrin-containing compound biosynthetic process	8/533	30/29008	5.05633e-08	2.88982e-06	2.54395e-06	Abcb6/Alad/Alas1/Atpif1/Cpox/Slc11a2/Urod/Uros	8
Down-regulated	GO:0033014	tetrapyrrole biosynthetic process	8/533	30/29008	5.05633e-08	2.88982e-06	2.54395e-06	Abcb6/Alad/Alas1/Atpif1/Cpox/Slc11a2/Urod/Uros	8
Down-regulated	GO:0044743	protein transmembrane import into intracellular organelle	8/533	35/29008	1.8755e-07	9.1655e-06	8.06852e-06	Chchd4/Dnajc15/Dnajc19/Hspd1/Romo1/Timm17a/Timm21/Tomm20	8
Down-regulated	GO:0065002	intracellular protein transmembrane transport	8/533	53/29008	5.2844e-06	0.000155419	0.000136818	Chchd4/Dnajc15/Dnajc19/Hspd1/Romo1/Timm17a/Timm21/Tomm20	8
Down-regulated	GO:0071806	protein transmembrane transport	8/533	57/29008	9.23819e-06	0.000266249	0.000234383	Chchd4/Dnajc15/Dnajc19/Hspd1/Romo1/Timm17a/Timm21/Tomm20	8
Down-regulated	GO:0006278	RNA-dependent DNA biosynthetic process	8/533	60/29008	1.36313e-05	0.000367719	0.000323708	Cct5/Cct7/Cct8/Dkc1/Gar1/Hsp90aa1/Nhp2/Tcp1	8
Down-regulated	GO:0007004	telomere maintenance via telomerase	8/533	60/29008	1.36313e-05	0.000367719	0.000323708	Cct5/Cct7/Cct8/Dkc1/Gar1/Hsp90aa1/Nhp2/Tcp1	8
Down-regulated	GO:0010833	telomere maintenance via telomere lengthening	8/533	74/29008	6.41447e-05	0.0014917	0.00131316	Cct5/Cct7/Cct8/Dkc1/Gar1/Hsp90aa1/Nhp2/Tcp1	8
Down-regulated	GO:2000573	positive regulation of DNA biosynthetic process	8/533	76/29008	7.77219e-05	0.00175891	0.0015484	Cct5/Cct7/Cct8/Dkc1/Hsp90aa1/Rfc4/Rgcc/Tcp1	8
Down-regulated	GO:0061157	mRNA destabilization	8/533	82/29008	0.000133464	0.00284835	0.00250745	Exosc2/Exosc3/Exosc7/Exosc8/Exosc9/Lsm1/Mettl3/Polr2g	8
Down-regulated	GO:0050779	RNA destabilization	8/533	86/29008	0.000186387	0.00380908	0.00335319	Exosc2/Exosc3/Exosc7/Exosc8/Exosc9/Lsm1/Mettl3/Polr2g	8
Down-regulated	GO:0061014	positive regulation of mRNA catabolic process	8/533	86/29008	0.000186387	0.00380908	0.00335319	Exosc2/Exosc3/Exosc7/Exosc8/Exosc9/Lsm1/Mettl3/Polr2g	8
Down-regulated	GO:0009408	response to heat	8/533	96/29008	0.000397101	0.00731707	0.00644133	Eif2b1/Eif2b3/Eif2b5/Eif2s1/Hikeshi/Hsp90aa1/Hspa1b/Trpm2	8
Down-regulated	GO:0035967	cellular response to topologically incorrect protein	8/533	108/29008	0.00087095	0.0143963	0.0126733	Dnajb14/Eif2s1/Hspa1b/Hspa8/Hspd1/Optn/Selenos/Tmem33	8
Down-regulated	GO:0000041	transition metal ion transport	8/533	110/29008	0.000981955	0.0156186	0.0137493	Abcb6/Atp7b/Fth1/Iscu/Rep15/Slc11a2/Slc40a1/Trpm2	8
Down-regulated	GO:0009141	nucleoside triphosphate metabolic process	8/533	116/29008	0.00138434	0.0208392	0.0183451	Atp5g1/Atp5k/Atp5l/Atp5o/Cmpk2/Nme1/Nme6/Ran	8
Down-regulated	GO:0051028	mRNA transport	8/533	117/29008	0.00146256	0.0214425	0.0188761	Ddx39a/Ncbp2/Nup107/Nup35/Nup54/Sarnp/Slbp/Srsf7	8
Down-regulated	GO:2000278	regulation of DNA biosynthetic process	8/533	118/29008	0.00154426	0.022445	0.0197586	Cct5/Cct7/Cct8/Dkc1/Hsp90aa1/Rfc4/Rgcc/Tcp1	8
Down-regulated	GO:2000045	regulation of G1/S transition of mitotic cell cycle	8/533	128/29008	0.00257623	0.0338018	0.0297562	Anp32b/Brd7/Cdk2ap2/Lsm10/Psme2/Psme3/Rgcc/Rps27l	8
Down-regulated	GO:0055076	transition metal ion homeostasis	8/533	138/29008	0.00408245	0.0490197	0.0431527	Abcb6/Atp7b/Bola2/Fth1/Iscu/Rhag/Slc11a2/Slc40a1	8
Down-regulated	GO:0071025	RNA surveillance	7/533	15/29008	3.85134e-09	3.16749e-07	2.78839e-07	Exosc2/Exosc3/Exosc4/Exosc7/Exosc8/Exosc9/Pelo	7
Down-regulated	GO:0000291	nuclear-transcribed mRNA catabolic process, exonucleolytic	7/533	16/29008	6.73836e-09	5.40994e-07	4.76245e-07	Exosc2/Exosc3/Exosc4/Exosc7/Exosc8/Exosc9/Polr2g	7
Down-regulated	GO:0034472	snRNA 3'-end processing	7/533	20/29008	4.2837e-08	2.5794e-06	2.27068e-06	Exosc2/Exosc3/Exosc4/Exosc7/Exosc8/Exosc9/Ints8	7
Down-regulated	GO:0016075	rRNA catabolic process	7/533	21/29008	6.32388e-08	3.38478e-06	2.97967e-06	Exosc2/Exosc3/Exosc4/Exosc7/Exosc8/Exosc9/Pelo	7
Down-regulated	GO:0006783	heme biosynthetic process	7/533	25/29008	2.4528e-07	1.10278e-05	9.70794e-06	Alad/Alas1/Atpif1/Cpox/Slc11a2/Urod/Uros	7
Down-regulated	GO:0016180	snRNA processing	7/533	25/29008	2.4528e-07	1.10278e-05	9.70794e-06	Exosc2/Exosc3/Exosc4/Exosc7/Exosc8/Exosc9/Ints8	7
Down-regulated	GO:0090151	establishment of protein localization to mitochondrial membrane	7/533	26/29008	3.30342e-07	1.34206e-05	1.18144e-05	Calm3/Hsp90aa1/Mtch2/Romo1/Timm10/Timm13/Timm22	7
Down-regulated	GO:0000469	cleavage involved in rRNA processing	7/533	27/29008	4.38916e-07	1.76193e-05	1.55106e-05	Exosc2/Exosc3/Exosc7/Exosc8/Exosc9/Fcf1/Nhp2	7
Down-regulated	GO:0000470	maturation of LSU-rRNA	7/533	30/29008	9.59287e-07	3.44119e-05	3.02933e-05	Ddx18/Gtpbp4/Nhp2/Rpf1/Rpf2/Rrp15/Znhit3	7
Down-regulated	GO:0006458	'de novo' protein folding	7/533	37/29008	4.34036e-06	0.000133052	0.000117128	Bag1/Chchd4/Dnajb14/Hspa1b/Hspa8/Hspe1/Hsph1	7
Down-regulated	GO:0051084	'de novo' posttranslational protein folding	7/533	37/29008	4.34036e-06	0.000133052	0.000117128	Bag1/Chchd4/Dnajb14/Hspa1b/Hspa8/Hspe1/Hsph1	7
Down-regulated	GO:0034661	ncRNA catabolic process	7/533	38/29008	5.23661e-06	0.000155419	0.000136818	Exosc2/Exosc3/Exosc4/Exosc7/Exosc8/Exosc9/Pelo	7
Down-regulated	GO:0000288	nuclear-transcribed mRNA catabolic process, deadenylation-dependent decay	7/533	52/29008	4.44634e-05	0.00108645	0.000956422	Exosc2/Exosc3/Exosc7/Exosc8/Exosc9/Lsm1/Polr2g	7
Down-regulated	GO:0051205	protein insertion into membrane	7/533	53/29008	5.04255e-05	0.00119743	0.00105411	Emc4/Emc9/Hsp90aa1/Romo1/Timm10/Timm13/Timm22	7
Down-regulated	GO:0061077	chaperone-mediated protein folding	7/533	58/29008	9.08853e-05	0.00200304	0.00176331	Bag1/Dnajb14/Hspa1b/Hspa8/Hspe1/Hsph1/Ppid	7
Down-regulated	GO:0000079	regulation of cyclin-dependent protein serine/threonine kinase activity	7/533	72/29008	0.000357078	0.00668927	0.00588866	Bccip/Ccnb1/Ccnb2/Ccne1/Gtpbp4/Psmd10/Rgcc	7
Down-regulated	GO:1904029	regulation of cyclin-dependent protein kinase activity	7/533	76/29008	0.000497616	0.00911935	0.0080279	Bccip/Ccnb1/Ccnb2/Ccne1/Gtpbp4/Psmd10/Rgcc	7
Down-regulated	GO:0006400	tRNA modification	7/533	77/29008	0.000538842	0.00961362	0.00846301	Dtwd1/Mettl1/Osgepl1/Qtrt1/Thg1l/Trmo/Trmt12	7
Down-regulated	GO:0009142	nucleoside triphosphate biosynthetic process	7/533	82/29008	0.00078753	0.0132778	0.0116886	Atp5g1/Atp5k/Atp5l/Atp5o/Cmpk2/Nme1/Nme6	7
Down-regulated	GO:0051881	regulation of mitochondrial membrane potential	7/533	85/29008	0.00097546	0.0155889	0.0137231	Atp5g1/Atpif1/Mtch2/Mtln/Ppid/Prdx3/Slc25a33	7
Down-regulated	GO:0009205	purine ribonucleoside triphosphate metabolic process	7/533	87/29008	0.00111917	0.0175528	0.015452	Atp5g1/Atp5k/Atp5l/Atp5o/Nme1/Nme6/Ran	7
Down-regulated	GO:0034620	cellular response to unfolded protein	7/533	88/29008	0.00119699	0.0184651	0.0162551	Eif2s1/Hspa1b/Hspa8/Hspd1/Optn/Selenos/Tmem33	7
Down-regulated	GO:0009199	ribonucleoside triphosphate metabolic process	7/533	91/29008	0.00145612	0.0214412	0.018875	Atp5g1/Atp5k/Atp5l/Atp5o/Nme1/Nme6/Ran	7
Down-regulated	GO:1903578	regulation of ATP metabolic process	7/533	91/29008	0.00145612	0.0214412	0.018875	Atpif1/Cox7a2/Dnajc15/Gadd45gip1/Mtch2/Slc25a33/Uqcc2	7
Down-regulated	GO:0009144	purine nucleoside triphosphate metabolic process	7/533	95/29008	0.00186737	0.0261277	0.0230006	Atp5g1/Atp5k/Atp5l/Atp5o/Nme1/Nme6/Ran	7
Down-regulated	GO:0002181	cytoplasmic translation	7/533	96/29008	0.00198301	0.0271668	0.0239153	Eif2b3/Eif2s2/Eif3d/Gspt1/Mettl3/Rpl36al/Tma7	7
Down-regulated	GO:0034502	protein localization to chromosome	7/533	96/29008	0.00198301	0.0271668	0.0239153	Cct5/Cct7/Cct8/Dkc1/Ruvbl2/Spdl1/Tcp1	7
Down-regulated	GO:0034475	U4 snRNA 3'-end processing	6/533	8/29008	1.01564e-09	9.25609e-08	8.14827e-08	Exosc2/Exosc3/Exosc4/Exosc7/Exosc8/Exosc9	6
Down-regulated	GO:0034427	nuclear-transcribed mRNA catabolic process, exonucleolytic, 3'-5'	6/533	11/29008	1.59879e-08	1.05708e-06	9.30566e-07	Exosc2/Exosc3/Exosc4/Exosc7/Exosc8/Exosc9	6
Down-regulated	GO:0071027	nuclear RNA surveillance	6/533	13/29008	5.75513e-08	3.18136e-06	2.8006e-06	Exosc2/Exosc3/Exosc4/Exosc7/Exosc8/Exosc9	6
Down-regulated	GO:0071028	nuclear mRNA surveillance	6/533	13/29008	5.75513e-08	3.18136e-06	2.8006e-06	Exosc2/Exosc3/Exosc4/Exosc7/Exosc8/Exosc9	6
Down-regulated	GO:0030150	protein import into mitochondrial matrix	6/533	19/29008	8.28388e-07	3.10369e-05	2.73223e-05	Dnajc15/Dnajc19/Romo1/Timm17a/Timm21/Tomm20	6
Down-regulated	GO:0000466	maturation of 5.8S rRNA from tricistronic rRNA transcript (SSU-rRNA, 5.8S rRNA, LSU-rRNA)	6/533	24/29008	3.80062e-06	0.000118664	0.000104462	Exosc2/Exosc3/Exosc7/Exosc8/Exosc9/Fcf1	6
Down-regulated	GO:0016226	iron-sulfur cluster assembly	6/533	24/29008	3.80062e-06	0.000118664	0.000104462	Ciao2b/Ciao3/Glrx5/Iscu/Lyrm4/Nubp2	6
Down-regulated	GO:0031163	metallo-sulfur cluster assembly	6/533	24/29008	3.80062e-06	0.000118664	0.000104462	Ciao2b/Ciao3/Glrx5/Iscu/Lyrm4/Nubp2	6
Down-regulated	GO:0070199	establishment of protein localization to chromosome	6/533	26/29008	6.30127e-06	0.000183171	0.000161248	Cct5/Cct7/Cct8/Dkc1/Ruvbl2/Tcp1	6
Down-regulated	GO:0007007	inner mitochondrial membrane organization	6/533	31/29008	1.86405e-05	0.00049106	0.000432287	Chchd3/Micos13/Romo1/Timm10/Timm13/Timm22	6
Down-regulated	GO:0051085	chaperone cofactor-dependent protein refolding	6/533	32/29008	2.25876e-05	0.000581261	0.000511693	Bag1/Dnajb14/Hspa1b/Hspa8/Hspe1/Hsph1	6
Down-regulated	GO:0017004	cytochrome complex assembly	6/533	34/29008	3.24952e-05	0.00080569	0.000709261	Coa3/Cox17/Slc25a33/Surf1/Timm21/Uqcc2	6
Down-regulated	GO:1903715	regulation of aerobic respiration	6/533	35/29008	3.86129e-05	0.000950385	0.000836637	Cox7a2/Dnajc15/Gadd45gip1/Iscu/Slc25a33/Uqcc2	6
Down-regulated	GO:0006826	iron ion transport	6/533	59/29008	0.00073903	0.0125227	0.0110239	Abcb6/Fth1/Iscu/Rep15/Slc11a2/Slc40a1	6
Down-regulated	GO:0006446	regulation of translational initiation	6/533	60/29008	0.000808576	0.0135648	0.0119413	Eif2s1/Eif3b/Eif3k/Mettl3/Ncbp2/Polr2g	6
Down-regulated	GO:0009206	purine ribonucleoside triphosphate biosynthetic process	6/533	69/29008	0.00168562	0.0241869	0.0212921	Atp5g1/Atp5k/Atp5l/Atp5o/Nme1/Nme6	6
Down-regulated	GO:0001510	RNA methylation	6/533	70/29008	0.00181554	0.0258312	0.0227396	Emg1/Mettl1/Mettl3/Trmo/Trmt10c/Trmt12	6
Down-regulated	GO:0009145	purine nucleoside triphosphate biosynthetic process	6/533	70/29008	0.00181554	0.0258312	0.0227396	Atp5g1/Atp5k/Atp5l/Atp5o/Nme1/Nme6	6
Down-regulated	GO:0009201	ribonucleoside triphosphate biosynthetic process	6/533	72/29008	0.00209797	0.0282974	0.0249107	Atp5g1/Atp5k/Atp5l/Atp5o/Nme1/Nme6	6
Down-regulated	GO:0042274	ribosomal small subunit biogenesis	6/533	72/29008	0.00209797	0.0282974	0.0249107	Fcf1/Gtf2h5/Mrps7/Ngdn/Rps27l/Tsr3	6
Down-regulated	GO:0071029	nuclear ncRNA surveillance	5/533	6/29008	1.21489e-08	8.19323e-07	7.21262e-07	Exosc2/Exosc3/Exosc7/Exosc8/Exosc9	5
Down-regulated	GO:0071035	nuclear polyadenylation-dependent rRNA catabolic process	5/533	6/29008	1.21489e-08	8.19323e-07	7.21262e-07	Exosc2/Exosc3/Exosc7/Exosc8/Exosc9	5
Down-regulated	GO:0071038	nuclear polyadenylation-dependent tRNA catabolic process	5/533	6/29008	1.21489e-08	8.19323e-07	7.21262e-07	Exosc2/Exosc3/Exosc7/Exosc8/Exosc9	5
Down-regulated	GO:0071046	nuclear polyadenylation-dependent ncRNA catabolic process	5/533	6/29008	1.21489e-08	8.19323e-07	7.21262e-07	Exosc2/Exosc3/Exosc7/Exosc8/Exosc9	5
Down-regulated	GO:0106354	tRNA surveillance	5/533	6/29008	1.21489e-08	8.19323e-07	7.21262e-07	Exosc2/Exosc3/Exosc7/Exosc8/Exosc9	5
Down-regulated	GO:0043634	polyadenylation-dependent ncRNA catabolic process	5/533	7/29008	4.18764e-08	2.56741e-06	2.26012e-06	Exosc2/Exosc3/Exosc7/Exosc8/Exosc9	5
Down-regulated	GO:0043633	polyadenylation-dependent RNA catabolic process	5/533	8/29008	1.09978e-07	5.535e-06	4.87254e-06	Exosc2/Exosc3/Exosc7/Exosc8/Exosc9	5
Down-regulated	GO:0000459	exonucleolytic trimming involved in rRNA processing	5/533	9/29008	2.437e-07	1.10278e-05	9.70794e-06	Exosc2/Exosc3/Exosc7/Exosc8/Exosc9	5
Down-regulated	GO:0000467	exonucleolytic trimming to generate mature 3'-end of 5.8S rRNA from tricistronic rRNA transcript (SSU-rRNA, 5.8S rRNA, LSU-rRNA)	5/533	9/29008	2.437e-07	1.10278e-05	9.70794e-06	Exosc2/Exosc3/Exosc7/Exosc8/Exosc9	5
Down-regulated	GO:0043928	exonucleolytic catabolism of deadenylated mRNA	5/533	9/29008	2.437e-07	1.10278e-05	9.70794e-06	Exosc2/Exosc3/Exosc7/Exosc8/Exosc9	5
Down-regulated	GO:0031125	rRNA 3'-end processing	5/533	10/29008	4.80019e-07	1.88212e-05	1.65686e-05	Exosc2/Exosc3/Exosc7/Exosc8/Exosc9	5
Down-regulated	GO:1904851	positive regulation of establishment of protein localization to telomere	5/533	10/29008	4.80019e-07	1.88212e-05	1.65686e-05	Cct5/Cct7/Cct8/Dkc1/Tcp1	5
Down-regulated	GO:0016078	tRNA catabolic process	5/533	11/29008	8.66711e-07	3.17669e-05	2.79648e-05	Exosc2/Exosc3/Exosc7/Exosc8/Exosc9	5
Down-regulated	GO:0070203	regulation of establishment of protein localization to telomere	5/533	11/29008	8.66711e-07	3.17669e-05	2.79648e-05	Cct5/Cct7/Cct8/Dkc1/Tcp1	5
Down-regulated	GO:0006123	mitochondrial electron transport, cytochrome c to oxygen	5/533	12/29008	1.46331e-06	5.08687e-05	4.47805e-05	Cox4i1/Cox5a/Cox5b/Cox7c/Cycs	5
Down-regulated	GO:0070202	regulation of establishment of protein localization to chromosome	5/533	12/29008	1.46331e-06	5.08687e-05	4.47805e-05	Cct5/Cct7/Cct8/Dkc1/Tcp1	5
Down-regulated	GO:1904816	positive regulation of protein localization to chromosome, telomeric region	5/533	13/29008	2.3419e-06	7.74206e-05	6.81544e-05	Cct5/Cct7/Cct8/Dkc1/Tcp1	5
Down-regulated	GO:0043144	sno(s)RNA processing	5/533	14/29008	3.58788e-06	0.00011633	0.000102407	Dkc1/Exosc2/Exosc3/Exosc4/Rnf113a1	5
Down-regulated	GO:0090503	RNA phosphodiester bond hydrolysis, exonucleolytic	5/533	15/29008	5.30047e-06	0.000155419	0.000136818	Exosc2/Exosc3/Exosc7/Exosc8/Exosc9	5
Down-regulated	GO:1904814	regulation of protein localization to chromosome, telomeric region	5/533	15/29008	5.30047e-06	0.000155419	0.000136818	Cct5/Cct7/Cct8/Dkc1/Tcp1	5
Down-regulated	GO:0016074	sno(s)RNA metabolic process	5/533	17/29008	1.05947e-05	0.000290451	0.000255688	Dkc1/Exosc2/Exosc3/Exosc4/Rnf113a1	5
Down-regulated	GO:0070131	positive regulation of mitochondrial translation	5/533	17/29008	1.05947e-05	0.000290451	0.000255688	Coa3/Mpv17l2/Mrps27/Trmt10c/Uqcc2	5
Down-regulated	GO:0070200	establishment of protein localization to telomere	5/533	17/29008	1.05947e-05	0.000290451	0.000255688	Cct5/Cct7/Cct8/Dkc1/Tcp1	5
Down-regulated	GO:0051131	chaperone-mediated protein complex assembly	5/533	19/29008	1.93124e-05	0.000504818	0.000444398	Bbs12/Hsp90aa1/Pfdn6/Psmg2/Psmg3	5
Down-regulated	GO:0051204	protein insertion into mitochondrial membrane	5/533	20/29008	2.53615e-05	0.000643001	0.000566043	Hsp90aa1/Romo1/Timm10/Timm13/Timm22	5
Down-regulated	GO:0002082	regulation of oxidative phosphorylation	5/533	25/29008	8.05594e-05	0.00179898	0.00158367	Cox7a2/Dnajc15/Gadd45gip1/Slc25a33/Uqcc2	5
Down-regulated	GO:0070129	regulation of mitochondrial translation	5/533	26/29008	9.82399e-05	0.00213719	0.0018814	Coa3/Mpv17l2/Mrps27/Trmt10c/Uqcc2	5
Down-regulated	GO:0070198	protein localization to chromosome, telomeric region	5/533	30/29008	0.000200322	0.00404482	0.00356071	Cct5/Cct7/Cct8/Dkc1/Tcp1	5
Down-regulated	GO:0000154	rRNA modification	5/533	31/29008	0.00023526	0.00457655	0.00402881	Dkc1/Emg1/Gar1/Nhp2/Tsr3	5
Down-regulated	GO:0006270	DNA replication initiation	5/533	31/29008	0.00023526	0.00457655	0.00402881	Ccne1/Cdc45/Orc5/Pola2/Wrnip1	5
Down-regulated	GO:0062125	regulation of mitochondrial gene expression	5/533	31/29008	0.00023526	0.00457655	0.00402881	Coa3/Mpv17l2/Mrps27/Trmt10c/Uqcc2	5
Down-regulated	GO:0032212	positive regulation of telomere maintenance via telomerase	5/533	33/29008	0.000318834	0.00603993	0.00531704	Cct5/Cct7/Cct8/Dkc1/Tcp1	5
Down-regulated	GO:1904358	positive regulation of telomere maintenance via telomere lengthening	5/533	37/29008	0.000551276	0.00978369	0.00861273	Cct5/Cct7/Cct8/Dkc1/Tcp1	5
Down-regulated	GO:0048821	erythrocyte development	5/533	45/29008	0.00136989	0.0208075	0.0183172	Alas1/Klf1/Lyar/Rhag/Slc11a2	5
Down-regulated	GO:0032210	regulation of telomere maintenance via telomerase	5/533	49/29008	0.00201353	0.0273775	0.0241008	Cct5/Cct7/Cct8/Dkc1/Tcp1	5
Down-regulated	GO:0051289	protein homotetramerization	5/533	51/29008	0.0024072	0.0318317	0.0280219	Aldh1a3/Apip/Hprt/Thg1l/Trpm2	5
Down-regulated	GO:0007339	binding of sperm to zona pellucida	5/533	52/29008	0.00262371	0.0341588	0.0300705	Cct5/Cct7/Cct8/Hspa1b/Tcp1	5
Down-regulated	GO:0032206	positive regulation of telomere maintenance	5/533	52/29008	0.00262371	0.0341588	0.0300705	Cct5/Cct7/Cct8/Dkc1/Tcp1	5
Down-regulated	GO:0075525	viral translational termination-reinitiation	4/533	5/29008	5.55411e-07	2.1527e-05	1.89505e-05	Eif3b/Eif3d/Eif3g/Eif3l	4
Down-regulated	GO:0045039	protein insertion into mitochondrial inner membrane	4/533	7/29008	3.77535e-06	0.000118664	0.000104462	Romo1/Timm10/Timm13/Timm22	4
Down-regulated	GO:0031118	rRNA pseudouridine synthesis	4/533	10/29008	2.16772e-05	0.000562273	0.000494977	Dkc1/Gar1/Nhp2/Tsr3	4
Down-regulated	GO:0031126	sno(s)RNA 3'-end processing	4/533	12/29008	4.96217e-05	0.0011867	0.00104467	Dkc1/Exosc2/Exosc3/Exosc4	4
Down-regulated	GO:0043248	proteasome assembly	4/533	12/29008	4.96217e-05	0.0011867	0.00104467	Psmd10/Psmd11/Psmd5/Psmg2	4
Down-regulated	GO:0000463	maturation of LSU-rRNA from tricistronic rRNA transcript (SSU-rRNA, 5.8S rRNA, LSU-rRNA)	4/533	16/29008	0.000172088	0.00360422	0.00317285	Ddx18/Gtpbp4/Rpf2/Znhit3	4
Down-regulated	GO:0008334	histone mRNA metabolic process	4/533	17/29008	0.000221778	0.00439903	0.00387253	Exosc4/Lsm1/Lsm10/Slbp	4
Down-regulated	GO:0019081	viral translation	4/533	17/29008	0.000221778	0.00439903	0.00387253	Eif3b/Eif3d/Eif3g/Eif3l	4
Down-regulated	GO:0001522	pseudouridine synthesis	4/533	18/29008	0.000281015	0.00538399	0.0047396	Dkc1/Gar1/Nhp2/Tsr3	4
Down-regulated	GO:0042026	protein refolding	4/533	18/29008	0.000281015	0.00538399	0.0047396	Hsp90aa1/Hspa1b/Hspa8/Hspd1	4
Down-regulated	GO:0033617	mitochondrial cytochrome c oxidase assembly	4/533	21/29008	0.000526133	0.00947289	0.00833912	Coa3/Cox17/Surf1/Timm21	4
Down-regulated	GO:0015985	energy coupled proton transport, down electrochemical gradient	4/533	22/29008	0.000633765	0.0110728	0.00974758	Atp5g1/Atp5k/Atp5l/Atp5o	4
Down-regulated	GO:0015986	ATP synthesis coupled proton transport	4/533	22/29008	0.000633765	0.0110728	0.00974758	Atp5g1/Atp5k/Atp5l/Atp5o	4
Down-regulated	GO:0034755	iron ion transmembrane transport	4/533	22/29008	0.000633765	0.0110728	0.00974758	Abcb6/Iscu/Slc11a2/Slc40a1	4
Down-regulated	GO:0002183	cytoplasmic translational initiation	4/533	25/29008	0.00104924	0.016533	0.0145542	Eif2b3/Eif2s2/Eif3d/Mettl3	4
Down-regulated	GO:0008535	respiratory chain complex IV assembly	4/533	25/29008	0.00104924	0.016533	0.0145542	Coa3/Cox17/Surf1/Timm21	4
Down-regulated	GO:0006221	pyrimidine nucleotide biosynthetic process	4/533	26/29008	0.00122215	0.0187323	0.0164903	Cmpk2/Nme1/Nme6/Umps	4
Down-regulated	GO:0000027	ribosomal large subunit assembly	4/533	27/29008	0.00141405	0.0210981	0.018573	Brix1/Mrpl20/Mrto4/Rpf2	4
Down-regulated	GO:1901857	positive regulation of cellular respiration	4/533	27/29008	0.00141405	0.0210981	0.018573	Chchd4/Cycs/Gadd45gip1/Iscu	4
Down-regulated	GO:0016556	mRNA modification	4/533	29/29008	0.00185903	0.0261194	0.0229933	Dkc1/Hnrnpc/Mettl3/Trmt10c	4
Down-regulated	GO:0072528	pyrimidine-containing compound biosynthetic process	4/533	29/29008	0.00185903	0.0261194	0.0229933	Cmpk2/Nme1/Nme6/Umps	4
Down-regulated	GO:0006099	tricarboxylic acid cycle	4/533	32/29008	0.00269515	0.034954	0.0307705	Idh3b/Mdh2/Sdhb/Sucla2	4
Down-regulated	GO:0000454	snoRNA guided rRNA pseudouridine synthesis	3/533	5/29008	6.00129e-05	0.00141513	0.00124576	Dkc1/Gar1/Nhp2	3
Down-regulated	GO:0071051	polyadenylation-dependent snoRNA 3'-end processing	3/533	7/29008	0.00020434	0.0041014	0.00361052	Exosc2/Exosc3/Exosc4	3
Down-regulated	GO:0097250	mitochondrial respirasome assembly	3/533	8/29008	0.00032248	0.00607487	0.0053478	Cox7a2/Higd1a/Rab5if	3
Down-regulated	GO:0000492	box C/D snoRNP assembly	3/533	10/29008	0.000672311	0.0115665	0.0101821	Pih1d2/Ruvbl2/Znhit3	3
Down-regulated	GO:0006122	mitochondrial electron transport, ubiquinol to cytochrome c	3/533	10/29008	0.000672311	0.0115665	0.0101821	Cycs/Uqcr10/Uqcrq	3
Down-regulated	GO:0061635	regulation of protein complex stability	3/533	11/29008	0.000911839	0.0148537	0.0130759	Ecsit/Hspa8/Snf8	3
Down-regulated	GO:0000491	small nucleolar ribonucleoprotein complex assembly	3/533	12/29008	0.00119924	0.0184651	0.0162551	Pih1d2/Ruvbl2/Znhit3	3
Down-regulated	GO:0006335	DNA replication-dependent nucleosome assembly	3/533	12/29008	0.00119924	0.0184651	0.0162551	Asf1a/Asf1b/Hat1	3
Down-regulated	GO:0034723	DNA replication-dependent nucleosome organization	3/533	12/29008	0.00119924	0.0184651	0.0162551	Asf1a/Asf1b/Hat1	3
Down-regulated	GO:0060586	multicellular organismal iron ion homeostasis	3/533	13/29008	0.00153783	0.022445	0.0197586	Rhag/Slc11a2/Slc40a1	3
Down-regulated	GO:0006999	nuclear pore organization	3/533	14/29008	0.00193066	0.026681	0.0234877	Nup107/Nup35/Nup54	3
Down-regulated	GO:0009148	pyrimidine nucleoside triphosphate biosynthetic process	3/533	14/29008	0.00193066	0.026681	0.0234877	Cmpk2/Nme1/Nme6	3
Down-regulated	GO:0019321	pentose metabolic process	3/533	14/29008	0.00193066	0.026681	0.0234877	Rbks/Rpe/Rpia	3
Down-regulated	GO:0099116	tRNA 5'-end processing	3/533	15/29008	0.00238058	0.0316036	0.0278211	Pop5/Rpp30/Trmt10c	3
Down-regulated	GO:0032048	cardiolipin metabolic process	3/533	17/29008	0.00346204	0.0419928	0.0369669	Dnajc19/Ptpmt1/Tamm41	3
Down-regulated	GO:0098760	response to interleukin-7	3/533	17/29008	0.00346204	0.0419928	0.0369669	Hdgf/Hspd1/Ybx1	3
Down-regulated	GO:0098761	cellular response to interleukin-7	3/533	17/29008	0.00346204	0.0419928	0.0369669	Hdgf/Hspd1/Ybx1	3
Down-regulated	GO:0034471	ncRNA 5'-end processing	3/533	18/29008	0.00409825	0.0490197	0.0431527	Pop5/Rpp30/Trmt10c	3
Down-regulated	GO:0000960	regulation of mitochondrial RNA catabolic process	2/533	5/29008	0.00324821	0.0399743	0.03519	Grsf1/Slirp	2
Down-regulated	GO:0007253	cytoplasmic sequestering of NF-kappaB	2/533	5/29008	0.00324821	0.0399743	0.03519	Faf1/Psmd10	2
Down-regulated	GO:0009052	pentose-phosphate shunt, non-oxidative branch	2/533	5/29008	0.00324821	0.0399743	0.03519	Rpe/Rpia	2
Down-regulated	GO:0033015	tetrapyrrole catabolic process	2/533	5/29008	0.00324821	0.0399743	0.03519	Blvra/Blvrb	2
Down-regulated	GO:0035927	RNA import into mitochondrion	2/533	5/29008	0.00324821	0.0399743	0.03519	Mrpl18/Tomm20	2
Down-regulated	GO:0071033	nuclear retention of pre-mRNA at the site of transcription	2/533	5/29008	0.00324821	0.0399743	0.03519	Exosc2/Exosc3	2
Down-regulated	GO:0090666	scaRNA localization to Cajal body	2/533	5/29008	0.00324821	0.0399743	0.03519	Dkc1/Tcp1	2
Down-regulated	GO:1905232	cellular response to L-glutamate	2/533	5/29008	0.00324821	0.0399743	0.03519	Atp5g1/Bag1	2
