# Supplementary material for: Fetal liver macrophages contribute to the hematopoietic stem cell niche by controlling granulopoiesis
Source: eLife. 2024 Mar 25;13:e86493. doi: 10.7554/eLife.86493 (PMC11006421; doi:10.7554/eLife.86493)
Supplement: Supplementary file 5. [file elife-86493-supp5.xlsx]

## Sheet: Table S5
Immunofluorescence staining panel	Antibody	Fluorophore	Source	Cat#
	Goat anti-Rabbit IgG (H+L)	AF488	Thermo Fischer Scientific	A11008
	Goat anti-Rat IgG (H+L)	AF555	Thermo Fischer Scientific	A21434
	c-Kit (CD117)	BV711	BioLegend	105835
	Ter119	PE	BioLegend	116207
	Iba1	N/A	Abcam	178847
	TIM-4	N/A	BioLegend	130008
	F4/80	N/A	Bio-Rad	MCA497GA
Fetal liver macrophage antibody panel	CD11b	PE-Cy7	BioLegend	101216
	CD169	BV605	BioLegend	142413
	CD206	BV711	BioLegend	141727
	CD45	APC-Cy7	BioLegend	103116
	CD71	FITC	BioLegend	113806
	Cx3cr1	PE-Dazzle594	BioLegend	149014
	F4/80	AF700	BioLegend	123130
	Ly6C	BV510	BioLegend	128033
	Ly6G	PE	BioLegend	127607
	Ter119	BV421	BioLegend	116234
	Tim4	AF647	BioLegend	130008
	Vcam-1(CD106)	Biotin	BioLegend	105703
	Streptavidin	BV785	BD	405249
Fetal brain macrophage antibody panel	CD45	APC-Cy7	BioLegend	103116
	CD11b	PE-Cy7	BioLegend	101216
	F4/80	BV421	BioLegend	123132
	Ly6C	PE	BioLegend	128007
Fetal liver HSC antibody panel	CD11b	Biotin	BioLegend	101204
	NKp46	Biotin	BioLegend	137616
	CD3	Biotin	BioLegend	100304
	CD19	Biotin	BioLegend	115504
	Gr1	Biotin	BioLegend	108404
	Ter119	Biotin	BioLegend	116204
	c-Kit (CD117)	BV711	BioLegend	105835
	Sca1	BV510	BioLegend	108129
	CD48	AF647	BioLegend	103416
	CD150 (SLAM)	PE-Cy7	BioLegend	115914
	CD16/32 (Fcg R III/II)	APC-Cy7	BioLegend	101328
	CD34	BV421	BioLegend	119321
	CD135	PE	BioLegend	135306
	CD127	PerCP/Cy5.5	BioLegend	135022
	Streptavidin	FITC	BioLegend	405201
Macrophage heterogeneity antibody panel	Ly6C	Biotin	BioLegend	128004
	Ly6G	BUV395	BD	563978
	Vcam-1(CD106)	BUV563	BD	741246
	Ter119	BUV615	BD	751534
	CD11b	BUV737	BD	612800
	CD115	BUV661	BD	750949
	CD45	BUV805	BD	748370
	CD33	Super Bright 436	ThermoFisher Scientific	62-0331-82
	F4/80	BV510	BD	743280
	CD169	BV605	BioLegend	142413
	CD192 (Ccr2)	BV650	BD	747968
	CD182 (Cxcr2)	BV711	BD	747812
	Tim4	BV786	BD	742778
	CD63	PerCP/Cy5.5	BioLegend	143912
	CD369 (Clec7a)	PE	ThermoFisher Scientific	12-5859-82
	Cx3cr1	PE/Dazzle™ 594	BioLegend	149013
	CD204	PE-Cy7	ThermoFisher Scientific	25-2046-82
	Clec4f	AF647	BioLegend	156804
	CD206 (Mmr)	AF700	BioLegend	141734
	CD16/32 (Fcg R III/II)	-	BioLegend	101302
	Streptavidin	BUV496	BD	612775
Macrophage sorting antibody panel	F4/80	AF700	BioLegend	123130
	CD11b	PE-Cy7	BioLegend	101216
	CD45	APC-Cy7	BioLegend	103116
HSC sorting antibody panel	CD11b	Biotin	BioLegend	101204
	NKp46	Biotin	BioLegend	137616
	CD3	Biotin	BioLegend	100304
	CD19	Biotin	BioLegend	115504
	Gr1	Biotin	BioLegend	108404
	Ter119	Biotin	BioLegend	116204
	c-Kit (CD117)	APC-Cy7	BioLegend	105825
	Sca1	BV510	BioLegend	108129
	CD48	AF647	BioLegend	103416
	CD150 (SLAM)	PE-Cy7	BioLegend	115914
	Streptavidin	FITC	BioLegend	405201
Antibody panel for CODEX	Goat anti-mouse Clec4f	N/A	R&D systems	AF2784
	Goat anti-mouse IBA1	N/A	Novus Biologicals	NB100-1028
	Mouse anti-mouse ATPase	N/A	Abcam	ab237969
	Mouse anti-mouse SMA	N/A	Biolegend	904601
	Rabbit anti-mouse Apolipoprotein E	N/A	Abcam	ab271944
	Rat anti-mouse CD106	N/A	Biolegend	105702
	Rat anti-mouse CD115	N/A	Biolegend	135502
	Rat anti-mouse CD150	N/A	BioRad	MCA2274GA
	Rat anti-mouse CD169	N/A	Biolegend	142402
	Rat anti-mouse CD204	N/A	Biolegend	154702
	Rat anti-mouse CD206	N/A	BioRad	MCA2235GA
	Rat anti-mouse CD31	N/A	Biolegend	102502
	Rat anti-mouse CD45	N/A	Biolegend	103102
	Rat anti-mouse CD63	N/A	Biolegend	143902
	Rat anti-mouse c-kit	N/A	Biolegend	105802
	Rat anti-mouse CX3CR1	N/A	Biolegend	149002
	Rat anti-mouse Dectin-1	N/A	BioRad	MCA2289GA
	Rat anti-mouse F4/80	N/A	ThermoFisher Scientific	14-4801-95
	Rat anti-mouse Ly6C	N/A	Biolegend	128002
	Rat anti-mouse Ly6G	N/A	Biolegend	127602
	Rat anti-mouse Ter119	N/A	Biolegend	116202
	Rat anti-mouse Tim4	N/A	ThermoFisher Scientific	MA5-28256
	Rat anti-YFP	N/A	Antibodies Online	ABIN2685914
	Rat anti-mouse CD41	N/A	Biolegend	133902
Adoptive transfer blood FACS antibody panel	CD19	BV421	BioLegend	115537
	Ly6C	BV510	BioLegend	128033
	CD45.2	FITC	BioLegend	109806
	CD45.1	PerCP/Cy5.5	BioLegend	110728
	Ly6G	PE	BioLegend	127607
	CD11b	PE-Cy7	BioLegend	101216
	CD115	APC	BioLegend	135510
	CD3	APC-Cy7	BioLegend	100330
