# Supplementary material for: Fetal liver macrophages contribute to the hematopoietic stem cell niche by controlling granulopoiesis
Source: eLife. 2024 Mar 25;13:e86493. doi: 10.7554/eLife.86493 (PMC11006421; doi:10.7554/eLife.86493)
Supplement: Supplementary file 6. [file elife-86493-supp6.xlsx]

## Sheet: Table S6
Barcodes and reporters for CODEX
Barcode	Source	Cat#
BX004 – RX004	Akoya Biosciences	Cat# 5450014
BX005 – RX005	Akoya Biosciences	Cat# 5450024
BX006 – RX006	Akoya Biosciences	Cat# 5450027
BX013 – RX013	Akoya Biosciences	Cat# 5450017
BX015 – RX015	Akoya Biosciences	Cat# 5350001
BX016 – RX016	Akoya Biosciences	Cat# 5150001
BX017 – RX017	Akoya Biosciences	Cat# 5250001
BX019 – RX019	Akoya Biosciences	Cat# 5450002
BX021 – RX021	Akoya Biosciences	Cat# 5350002
BX022 – RX022	Akoya Biosciences	Cat# 5150003
BX023 – RX023	Akoya Biosciences	Cat# 5250003
BX024 – RX024	Akoya Biosciences	Cat# 5350003
BX026 – RX026	Akoya Biosciences	Cat# 5250004
BX027 – RX027	Akoya Biosciences	Cat# 5350004
BX028 – RX028	Akoya Biosciences	Cat# 5450005
BX032 – RX032	Akoya Biosciences	Cat# 5250006
BX037 – RX037	Akoya Biosciences	Cat# 5150008
BX040 – RX040	Akoya Biosciences	Cat# 5450009
BX041 – RX041	Akoya Biosciences	Cat# 5250008
BX042 – RX042	Akoya Biosciences	Cat# 5350008
BX043 – RX043	Akoya Biosciences	Cat# 5150010
BX049 – RX049	Akoya Biosciences	Cat# 5450012
